# Supplementary material for: Carboxylic acid-capped ruthenium nanoparticles: experimental and theoretical case study with ethanoic acid
Source: Royal Society of Chemistry journal article supplement (doi:10.1039/c9nr00391f), 2019-01-01
Supplement: c9nr00391f1.pdf [file c9nr00391f1.pdf]

## ***Carboxylic acid-capped ruthenium nanoparticles: experimental and theoretical case study with ethanoic acid***

González-Gómez, Roberto<sup>(a,b)</sup>; Cusinato, Lucy<sup>(a)</sup>; Bijani, Christian<sup>(b)</sup>; Coppel, Yannick<sup>(b)</sup>; Lecante, Pierre<sup>(c)</sup>; Amiens, Catherine<sup>(b)</sup>; del Rosal, Iker<sup>(a)</sup>; Philippot, Karine<sup>(b,\*)</sup>; Poteau, Romuald<sup>(a,\*)</sup>

(a) LPCNO (IRSAMC), Université de Toulouse; INSA, UPS, CNRS (UMR 5215); Institut National des Sciences Appliquées, 135 avenue de Rangueil, F-31077 Toulouse, France; (\*) romuald.poteau@univ-tlse3.fr (b) LCC-CNRS, Université de Toulouse, UPS, 205 route de Narbonne, BP 44099, F-31077-Toulouse Cedex 4, France; (\*) karine.philippot@lcc-toulouse.fr (c) CEMES-CNRS, 29 rue Jeanne Marvig BP4347, 31055 Toulouse Cedex, France.

**P2: Figure SI.1.** a) TEM images and b) corresponding size histogram of  $\text{Ru}_x(\text{CH}_3\text{COOH})_{0.2y}$  NPs.

**P3: Figure SI.2.** a) TEM and b) HRTEM images of  $\text{Ru}_x(\text{CH}_3\text{COOH})_{0.4y}$  NPs.

**PP4-10: Figure SI.3.** EDX data recorded for  $\text{Ru}_x(\text{CH}_3\text{COOH})_{0.4y}$  NPs.

**P11: Table SI.4.** Summary of EDX data for  $\text{Ru}_x(\text{CH}_3\text{COOH})_{0.4y}$  NPs and determination of the  $[\text{CH}_3\text{COOH}]/[\text{Ru}_{\text{surf}}]$  ratio with comparison with data obtained by experimental NMR quantification and theoretical titration at 300 K

**P12: Figure SI.5.** WAXS diagram of  $\text{Ru}_x(\text{CH}_3\text{COOH})_{0.4y}$  NPs (experimental data obtained in solid state).

**P13: Figure SI.6.** RDF of  $\text{Ru}_x(\text{CH}_3\text{COOH})_{0.4y}$  NPs (red profile: experimental data obtained in solid state; green profile: computed Ru hcp crystallite (30 atoms).

**P14: Figure SI.7.** Experimental  $^1\text{H}$  NMR spectrum ( $\text{THF-}d^8$ ) of  $\text{Ru}_x(\text{CH}_3\text{COOH})_{0.4y}$  NPs (in solid green) in comparison with that of free  $\text{CH}_3\text{COOH}$  (in dotted burgundy). The DFT  $^1\text{H}$ -NMR chemical shifts of the methyl group in different models ( $(\text{CH}_3\text{COOH})_2$ ,  $\text{CH}_3\text{COO}^-$ ,  $[\text{Ru}_6]$  clusters) are given on top of the figure. The DFT results are positioned by the blue thick horizontal lines.

**P15: Table SI.8.** Comparison of the  $^1\text{H}$  and  $^{13}\text{C}$  NMR chemical shieldings calculated for different carboxylic-based compounds and basis set.

**P16: Table SI.9.** Energies (in eV), labelling and coordination of the surface species in the 44 models used within the *ab initio* thermodynamics method.

**P17 and beyond:** Cartesian coordinates of all RuNPs studied in this work by DFT.

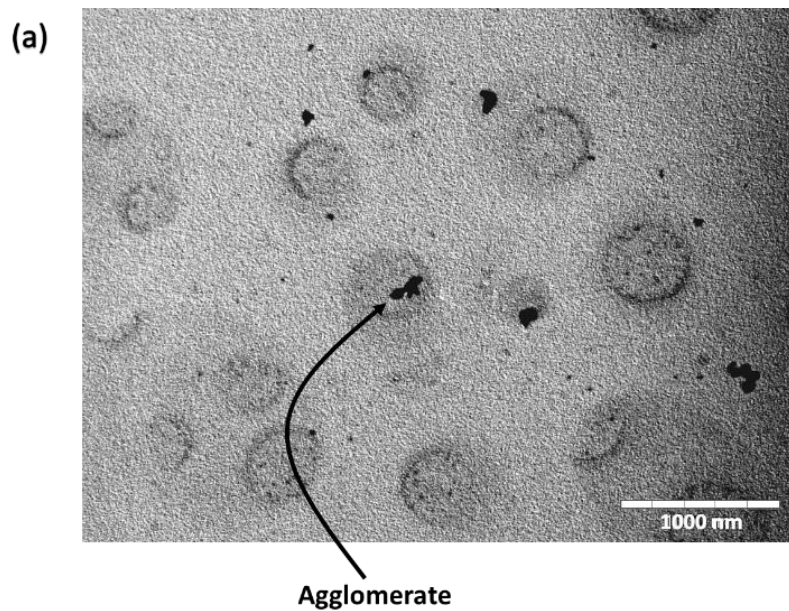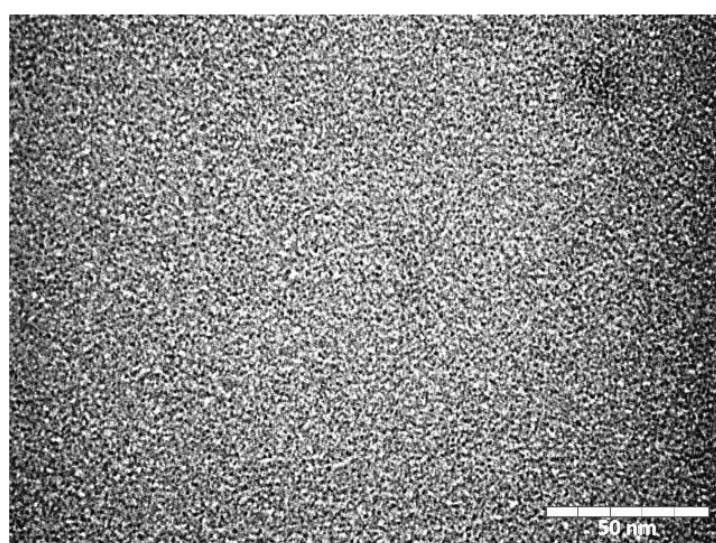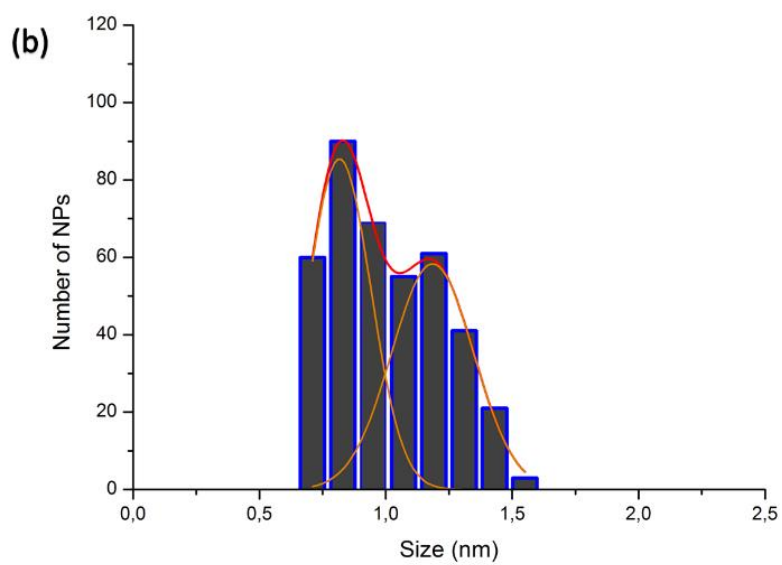

**Figure SI.1.** a) TEM images and b) corresponding size histogram of  $\text{Ru}_x(\text{CH}_3\text{COOH})_{0.2y}$  NPs.

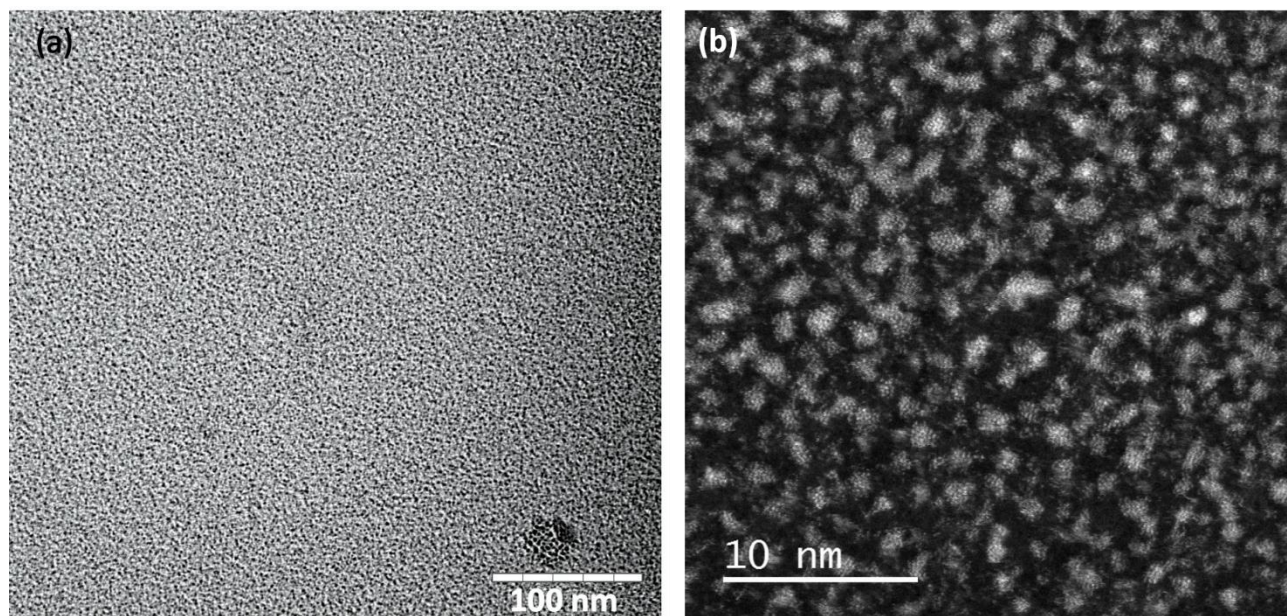

**Figure SI.2.** a) TEM and b) HRTEM images of Ru<sub>x</sub>(CH<sub>3</sub>COOH)<sub>0.4y</sub> NPs.

**Figure SI.3.** EDX data recorded for  $\text{Ru}_x(\text{CH}_3\text{COOH})_{0.4y}$  NPs.

Title :  $\text{Ru}_x(\text{CH}_3\text{COOH})_{0.4y}$   
 -----  
 Instrument : JEM-ARM200F (URP)  
 Volt : 200,00 kV  
 Mag. : x 5,000,000  
 Date : 2017/04/25  
 Pixel : 512 x 512

View **001** (in a group of NPs)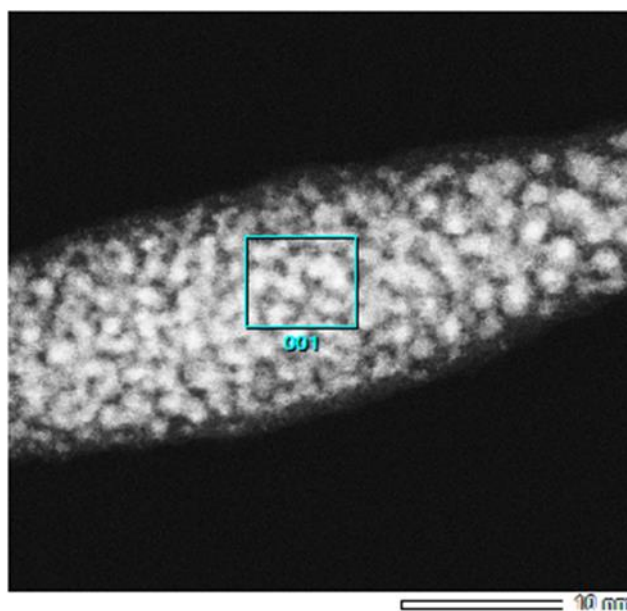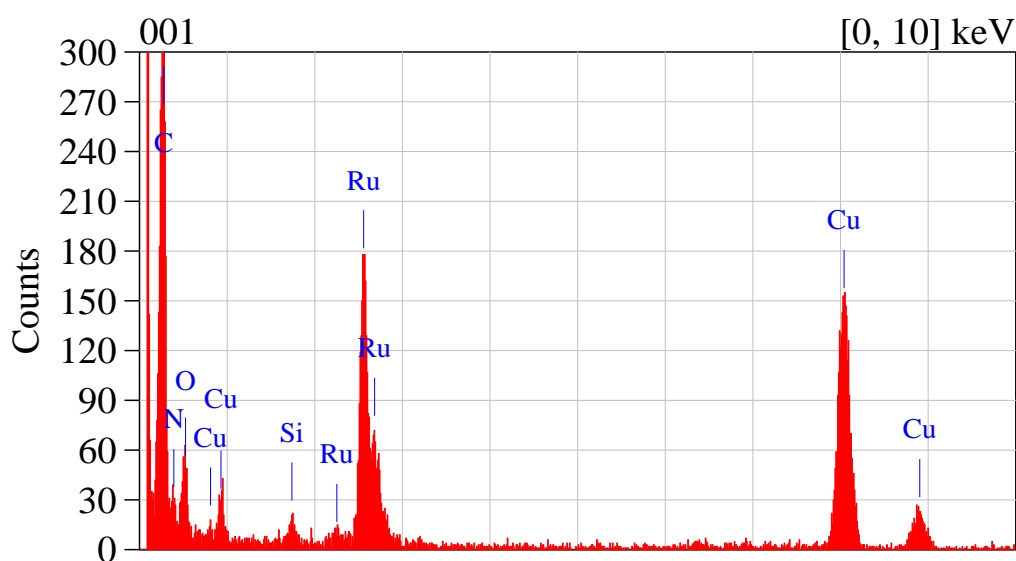

Thin Film Standardless Standardless Quantitative Analysis

Fitting Coefficient: 0.6664

| Element    | (keV) | Mass% | Counts | Sigma | Atom% | Compound | Mass% | Cation | K      |
|------------|-------|-------|--------|-------|-------|----------|-------|--------|--------|
| C K (Ref.) | 0.277 | 56.6  | 2322.9 | 0.8   | 84.3  |          |       |        | 1.0000 |
| N K !      | 0.392 | 5.2   | 317.1  | 0.4   | 6.7   |          |       |        | 0.6760 |
| O K !      | 0.525 | 2.4   | 191.5  | 0.3   | 2.7   |          |       |        | 0.5110 |
| Ru L       | 2.558 | 35.8  | 1612.6 | 1.2   | 6.3   |          |       |        | 0.9117 |
| Total      |       | 100.0 |        |       | 100.0 |          |       |        |        |



Views 002 (outside a group of NPs) and 003 (in a group of NPs)

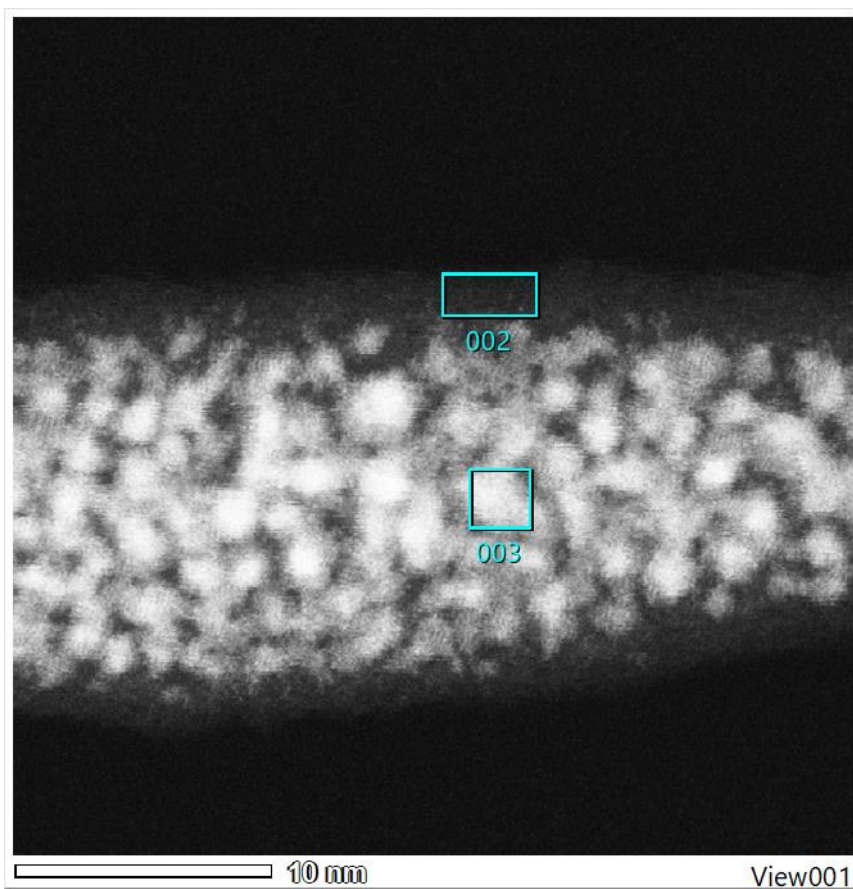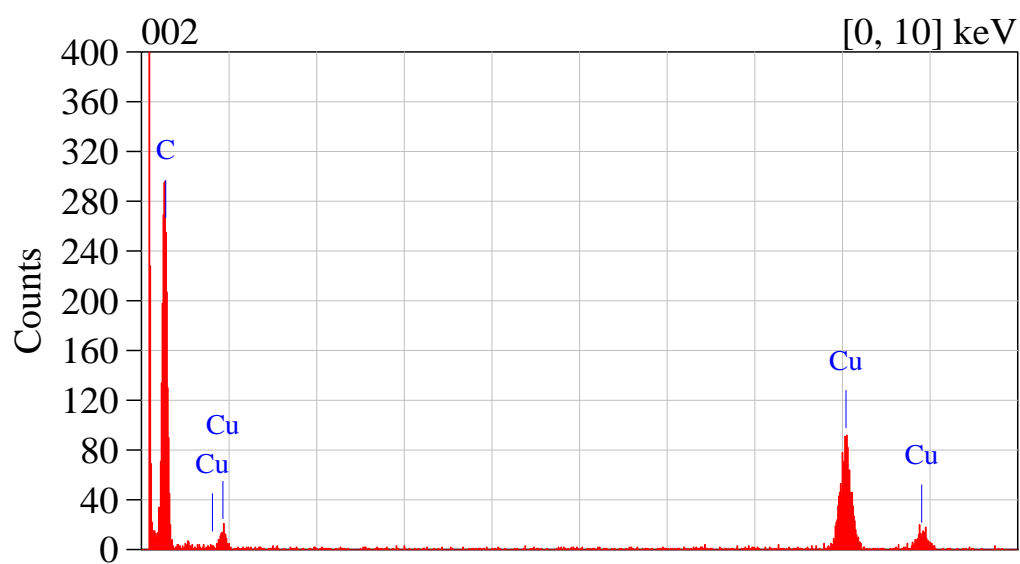

003

VFS = 1000 count

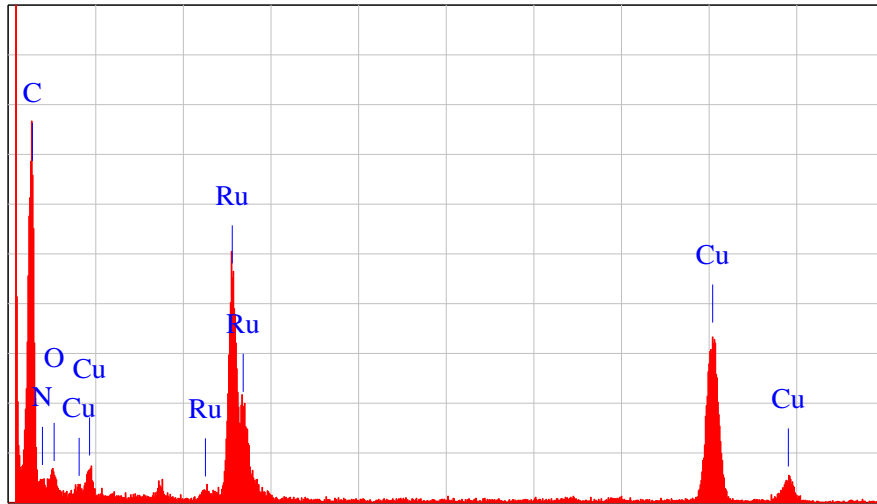

## Thin Film Standardless Standardless Quantitative Analysis

Fitting Coefficient: 0.6788

| Element    | (keV) | Mass% | Counts | Sigma | Atom% | Compound | Mass% | Cation | K      |
|------------|-------|-------|--------|-------|-------|----------|-------|--------|--------|
| C K (Ref.) | 0.277 | 54.2  | 3284.4 | 0.7   | 85.9  |          |       |        | 1.0000 |
| N K !      | 0.392 | 4.1   | 366.7  | 0.3   | 5.6   |          |       |        | 0.6760 |
| O K !      | 0.525 | 0.7   | 85.4   | 0.1   | 0.9   |          |       |        | 0.5110 |
| Ru L       | 2.558 | 41.0  | 2728.6 | 1.1   | 7.7   |          |       |        | 0.9117 |
| Total      |       | 100.0 |        |       | 100.0 |          |       |        |        |

Views 004 (outside a group of NPs) and 005 (in a group of NPs)

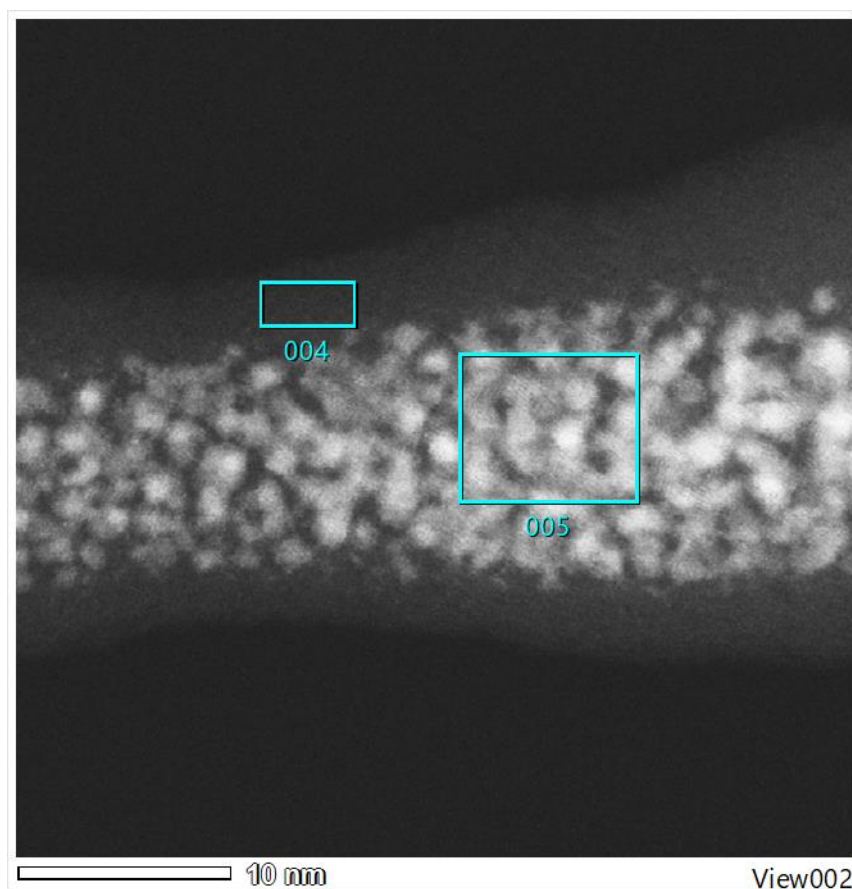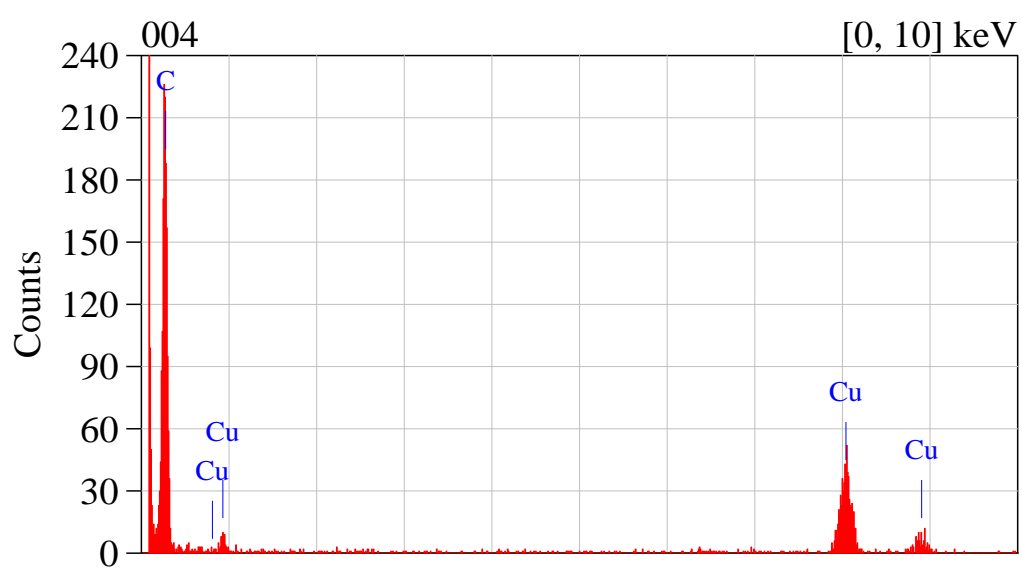

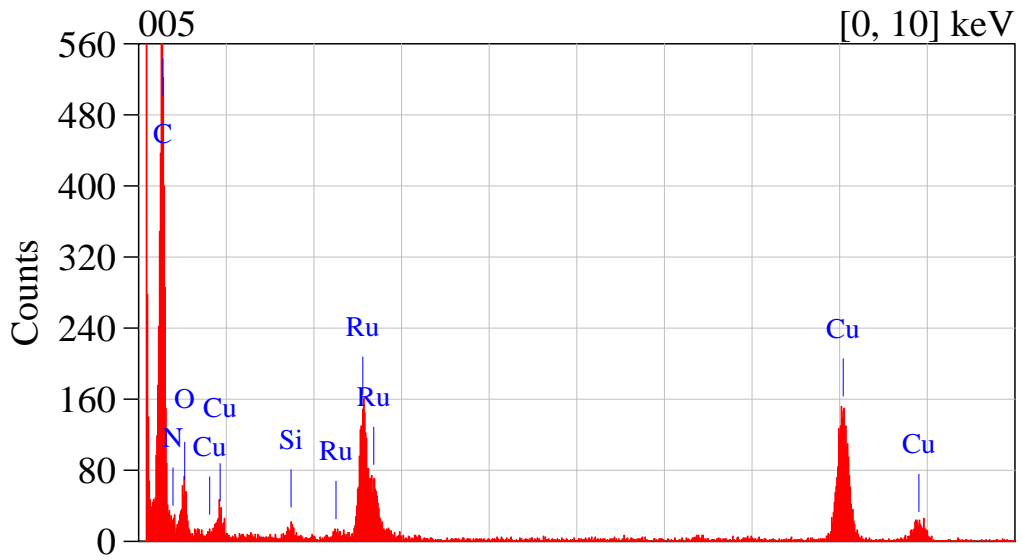

Thin Film Standardless Standardless Quantitative Analysis  
 Fitting Coefficient: 0.6107

| Element    | (keV) | Mass% | Counts | Sigma | Atom% | Compound | Mass% | Cation | K      |
|------------|-------|-------|--------|-------|-------|----------|-------|--------|--------|
| C K (Ref.) | 0.277 | 71.6  | 3907.5 | 0.8   | 89.6  |          |       |        | 1.0000 |
| N K !      | 0.392 | 5.4   | 432.4  | 0.4   | 5.7   |          |       |        | 0.6760 |
| O K !      | 0.525 | 1.6   | 168.2  | 0.2   | 1.5   |          |       |        | 0.5110 |
| Ru L       | 2.558 | 21.5  | 1287.5 | 0.9   | 3.2   |          |       |        | 0.9117 |
| Total      |       | 100.0 |        |       | 100.0 |          |       |        |        |



Views **006** (outside a group of NPs) and **007** (in a group of NPs)

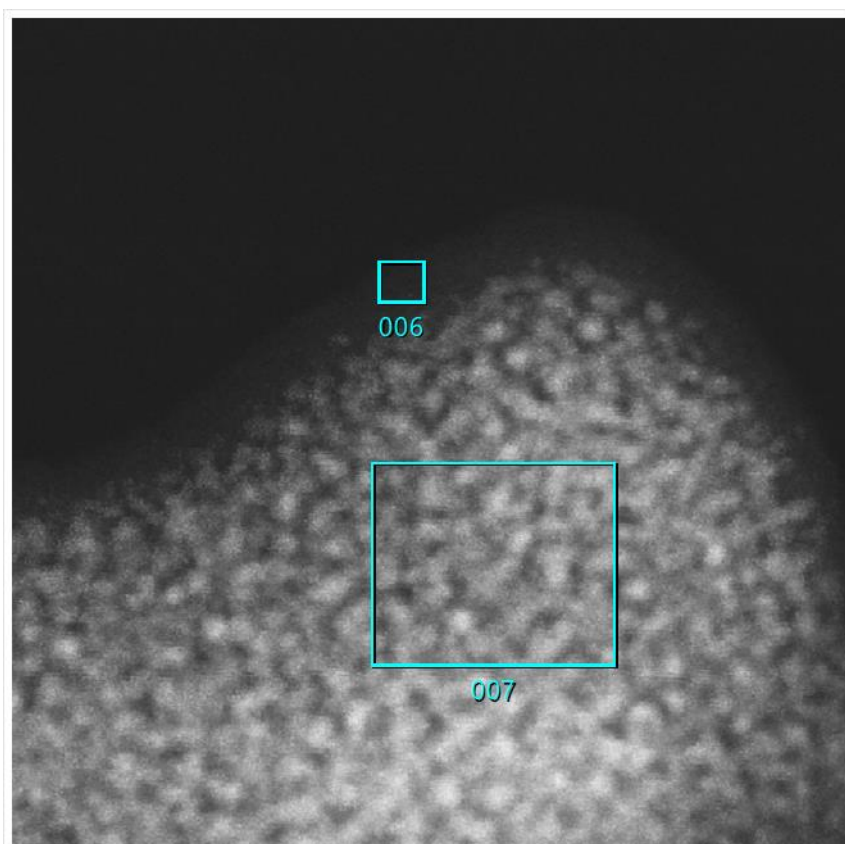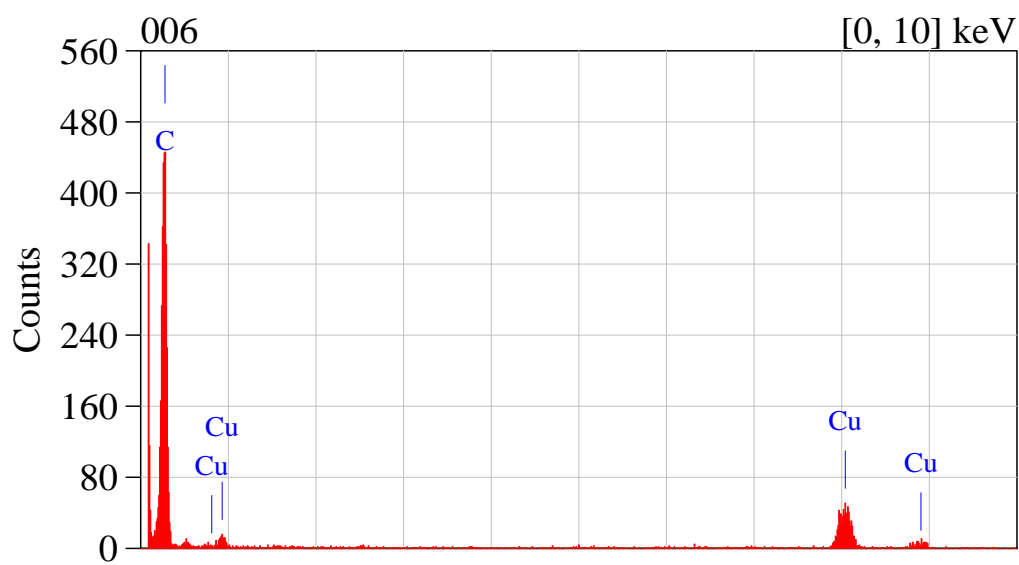

007

VFS = 1000 count

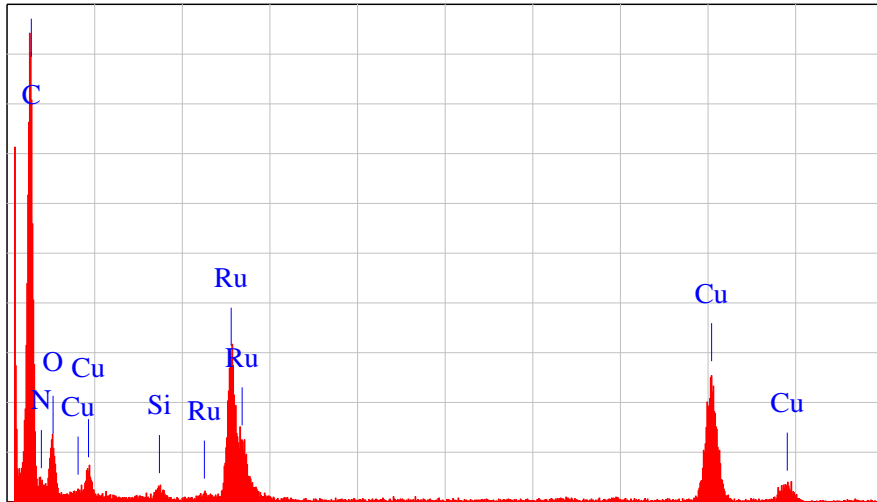

## Thin Film Standardless Standardless Quantitative Analysis

Fitting Coefficient : 0.5964

| Element    | (keV) | Mass% | Counts | Sigma | Atom% | Compound | Mass% | Cation | K      |
|------------|-------|-------|--------|-------|-------|----------|-------|--------|--------|
| C K (Ref.) | 0.277 | 66.3  | 6249.6 | 0.6   | 88.0  |          |       |        | 1.0000 |
| N K !      | 0.392 | 5.1   | 705.0  | 0.3   | 5.8   |          |       |        | 0.6760 |
| O K !      | 0.525 | 2.1   | 388.8  | 0.2   | 2.1   |          |       |        | 0.5110 |
| Ru L       | 2.558 | 26.6  | 2746.2 | 0.7   | 4.2   |          |       |        | 0.9117 |
| Total      |       | 100.0 |        |       | 100.0 |          |       |        |        |

| EDX data                                                        |          |          |          |          |           |                                     |                          |                               |                                  |
|-----------------------------------------------------------------|----------|----------|----------|----------|-----------|-------------------------------------|--------------------------|-------------------------------|----------------------------------|
| % Mass                                                          | View 001 | View 003 | View 005 | View 007 | $\bar{X}$ | [mmol]                              |                          | [O]/[Ru]                      | [CH <sub>3</sub> COOH]/[Ru]      |
| %C                                                              | 56,60    | 54,20    | 71,60    | 66,30    | 62,18     | 51,77                               |                          | 0,34                          | 0,17                             |
| %O                                                              | 2,40     | 0,70     | 1,60     | 2,10     | 1,70      | 1,06                                |                          |                               |                                  |
| %Ru                                                             | 35,80    | 41,00    | 21,50    | 26,60    | 31,23     | 3,09                                |                          |                               |                                  |
| %N                                                              | 5,20     | 4,10     | 5,40     | 5,10     | 4,95      | 3,54                                |                          |                               |                                  |
| Total                                                           | 100,00   | 100,00   | 100,00   | 100,00   |           |                                     |                          |                               |                                  |
| RuNP description                                                |          |          |          |          |           | Experimental quantification         |                          | Theoretical titration (300 K) |                                  |
| Total number of Ru atoms ( $d_{\text{mean}} = 1.5 \text{ nm}$ ) |          |          |          | 147      |           | H <sup>a</sup>                      | 0.3 H/Ru <sub>surf</sub> | H <sup>a</sup>                | [0.4 - 0.6] H/Ru <sub>surf</sub> |
| Number of Ru surface atoms (63.0 %)                             |          |          |          | 92       |           | CH <sub>3</sub> COOH (L)            | 0.3 L/Ru <sub>surf</sub> | CH <sub>3</sub> COOH (L)      | 0.4 L/Ru <sub>surf</sub>         |
|                                                                 |          |          |          |          |           | <sup>a</sup> %H is not known by EDX |                          |                               |                                  |
| [CH <sub>3</sub> COOH]/[Ru <sub>surf</sub> ]                    |          |          |          |          |           |                                     |                          |                               |                                  |
| 0,27                                                            |          |          |          |          |           |                                     |                          |                               |                                  |

**Table SI.4.** Summary of EDX data for Ru<sub>x</sub>(CH<sub>3</sub>COOH)<sub>0.4y</sub> NPs and determination of the [CH<sub>3</sub>COOH]/[Ru<sub>surf</sub>] ratio with comparison with data obtained by experimental NMR quantification and theoretical titration at 300 K.

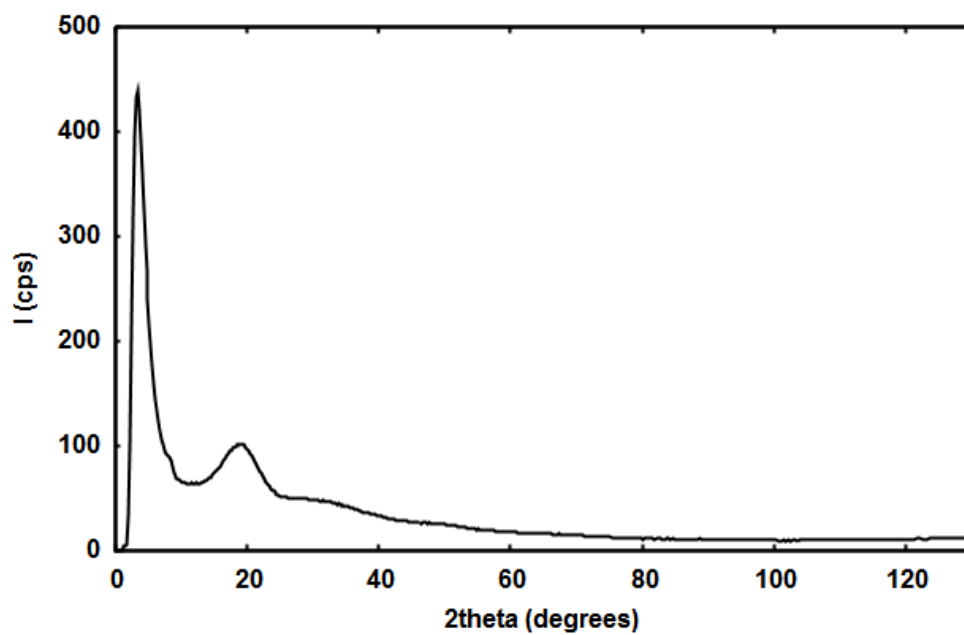

**Figure SI.5.** WAXS diagram of  $\text{Ru}_x(\text{CH}_3\text{COOH})_{0.4y}$  NPs (experimental data obtained in solid state).

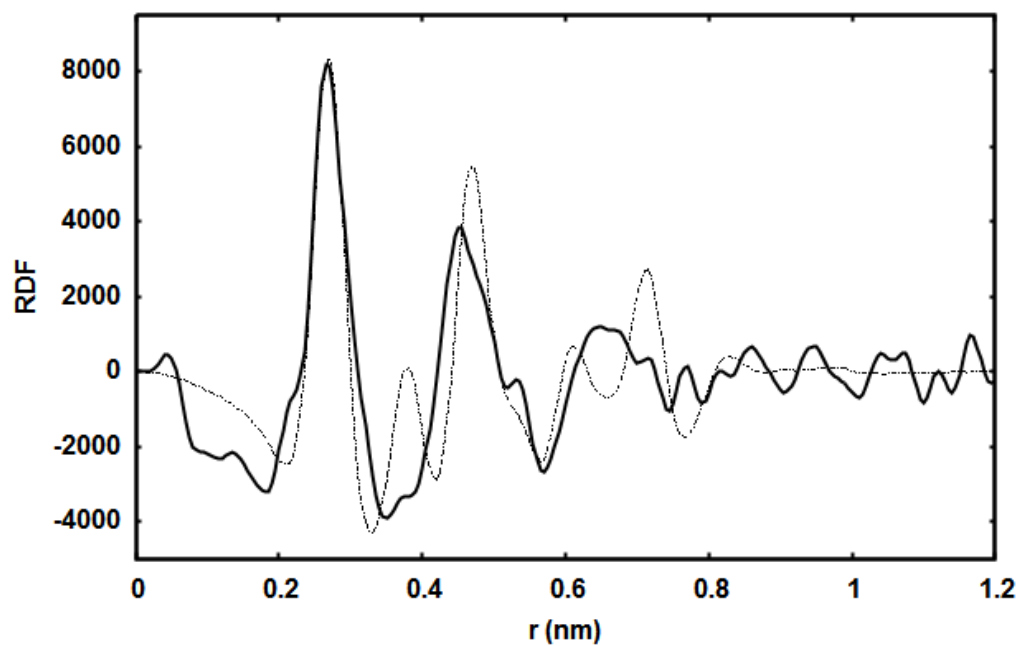

**Figure SI.6.** RDF of  $\text{Ru}_x(\text{CH}_3\text{COOH})_{0.4y}$  NPs (plain line: experimental data obtained in solid state; dashed line: computed Ru hcp crystallite (30 atoms)).

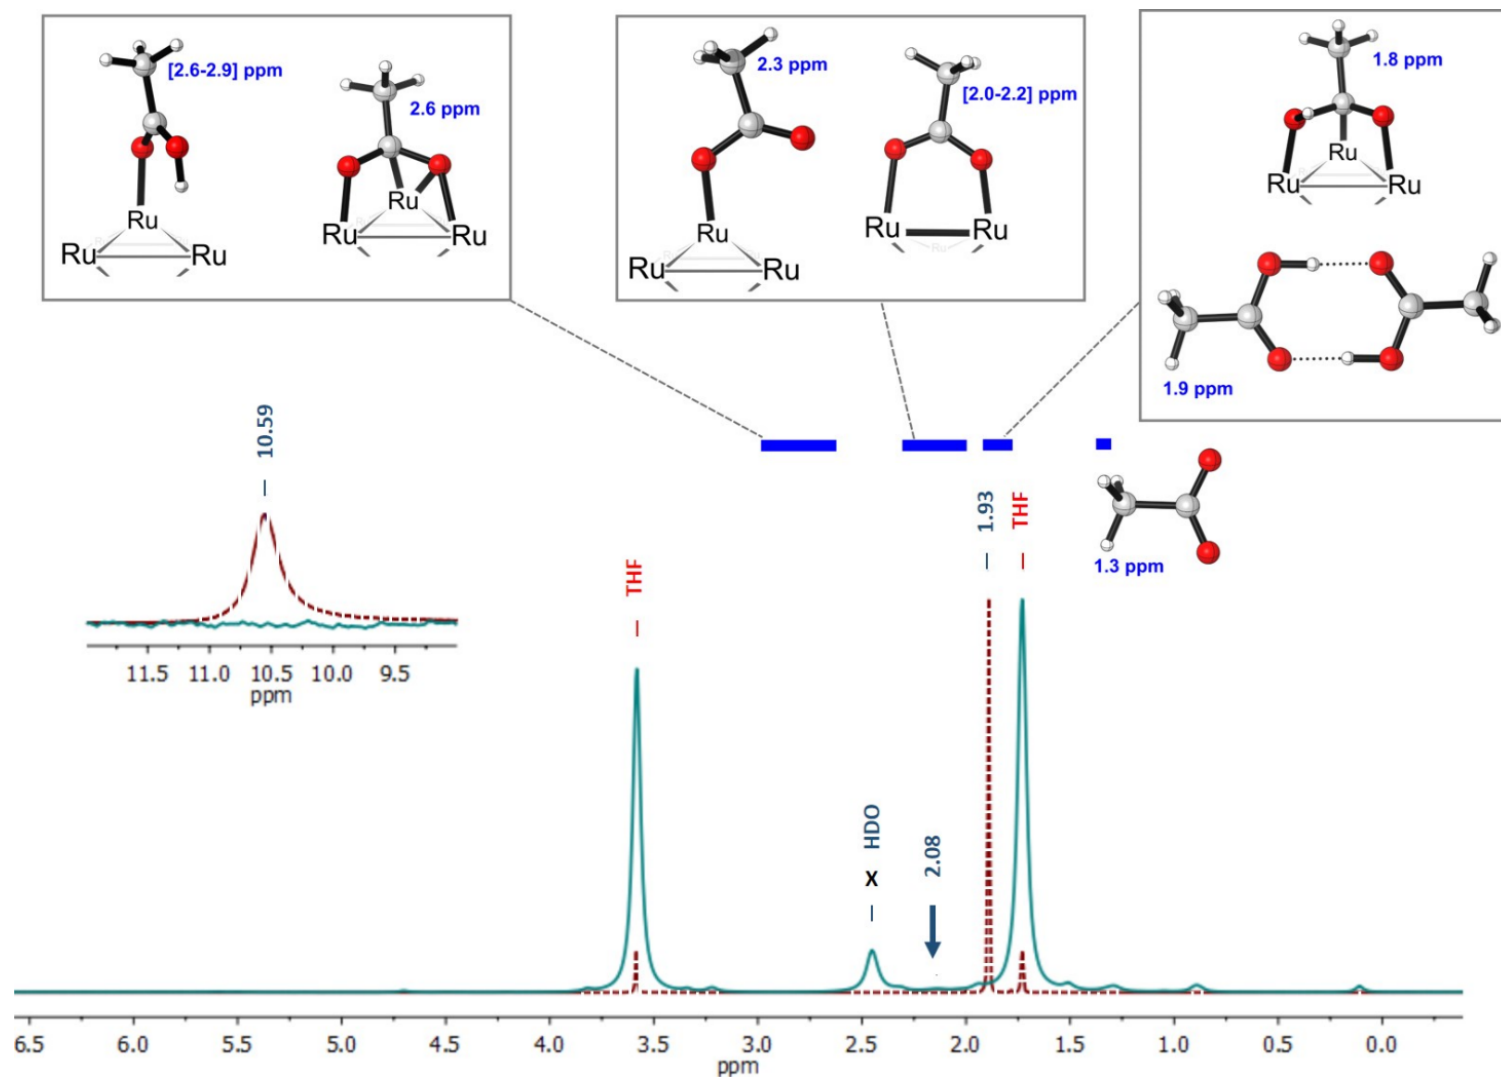

**Figure SI.7.** Experimental  $^1\text{H}$  NMR spectrum ( $\text{THF-d}^8$ ) of  $\text{Ru}_x(\text{CH}_3\text{COOH})_{0.4y}$  NPs (in solid green) in comparison with that of free  $\text{CH}_3\text{COOH}$  (in dotted burgundy). The DFT  $^1\text{H}$  NMR chemical shifts of the methyl group in different models ( $(\text{CH}_3\text{COOH})_2$ ,  $\text{CH}_3\text{COO}^-$ ,  $[\text{Ru}_6]$  clusters) are given on top of the figure. The DFT results are positioned by the blue thick horizontal lines.



|                                                                                                               |                 | 6-31G** |                |                 | cc-pvtz        |                 |
|---------------------------------------------------------------------------------------------------------------|-----------------|---------|----------------|-----------------|----------------|-----------------|
|                                                                                                               |                 | E       | <sup>1</sup> H | <sup>13</sup> C | <sup>1</sup> H | <sup>13</sup> C |
| TMS                                                                                                           |                 | σ       | 31.7           | 196.8           | 31.6           | 189.2           |
| <br><chem>(CH3COOH)2</chem>  | CH <sub>3</sub> | σ       | 29.7           | 175.3           | 29.6           | 167.5           |
|                                                                                                               |                 | δ       | 1.9            | 21.5            | 2.0            | 21.7            |
|                                                                                                               | C(OOH)          | σ       |                | 24.6            |                | 4.2             |
|                                                                                                               |                 | δ       |                |                 | 172.3          | 185.0           |
| <br><chem>(CH3COO)^-</chem>  | CH <sub>3</sub> | σ       | 30.7           | 169.7           | 30.3           | 163.4           |
|                                                                                                               |                 | δ       | 0.9            | 27.1            | 1.3            | 25.8            |
|                                                                                                               | C(OO)           | σ       |                | 39.4            |                | 18.2            |
|                                                                                                               |                 | δ       |                |                 | 157.4          | 171.0           |
| <br><chem>CH3COONa</chem>    | CH <sub>3</sub> | σ       | 29.9           | 172.7           | 29.7           | 165.8           |
|                                                                                                               |                 | δ       | 1.8            | 24.1            | 1.9            | 23.4            |
|                                                                                                               | C(OO)           | σ       |                | 21.1            |                | 1.4             |
|                                                                                                               |                 | δ       |                |                 | 175.7          | 187.8           |
| <br><chem>Mg(CH3COO)2</chem> | CH <sub>3</sub> | σ       | 29.6           | 175.7           | 29.5           | 167.9           |
|                                                                                                               |                 | δ       | 2.1            | 21.1            | 2.1            | 21.3            |
|                                                                                                               | C(OO)           | σ       |                | 11.8            |                | -7.2            |
|                                                                                                               |                 | δ       |                |                 | 185.0          | 196.4           |
| <br><chem>CH3COOH</chem>   | CH <sub>3</sub> | σ       | 29.8           | 177.5           | 29.6           | 169.7           |
|                                                                                                               |                 | δ       | 1.9            | 172.3           | 1.9            | 19.5            |
|                                                                                                               | C(OOH)          | σ       |                | 34.3            |                | 14.7            |
|                                                                                                               |                 | δ       |                |                 | 162.5          | 174.4           |

**Table SI.8.** Comparison of the <sup>1</sup>H and <sup>13</sup>C NMR chemical shieldings calculated for different carboxylic-based compounds and basis set.

**Table SI.9.** Energies (in eV), labelling and coordination of the surface species in the 44 models used within the *ab initio* thermodynamics method (the generation process of the geometries is explained in the “methods” section of the article).

| #  | E         | nH (a) | nH/Ru_surf (a) | nH* (b) | nH*/Ru_surf (b) | nCH <sub>3</sub> COOH | nCOO-* | nCOOH* | Name in Fig. 8                                                                          | xyz name         |
|----|-----------|--------|----------------|---------|-----------------|-----------------------|--------|--------|-----------------------------------------------------------------------------------------|------------------|
| 1  | -424.37   | 0      | 0.0            | 0       | 0.0             | 0                     | 0      | 0      | Ru <sub>55</sub>                                                                        | Ru_55            |
| 2  | -492.69   | 17     | 0.4            | 17      | 0.4             | 0                     | 0      | 0      | H <sub>17</sub>                                                                         | Ru_55-H_0.4      |
| 3  | -564.41   | 35     | 0.8            | 35      | 0.8             | 0                     | 0      | 0      | H <sub>35</sub>                                                                         | Ru_55-H_0.8      |
| 4  | -634.19   | 53     | 1.2            | 53      | 1.2             | 0                     | 0      | 0      | H <sub>53</sub>                                                                         | Ru_55-H_1.2      |
| 5  | -697.69   | 70     | 1.6            | 70      | 1.6             | 0                     | 0      | 0      | H <sub>70</sub>                                                                         | Ru_55-H_1.6      |
| 6  | -612.81   | 35     | 0.8            | 36      | 0.8             | 1                     | 1      | 0      | (CH <sub>3</sub> COO) H <sub>36</sub>                                                   | CH3COOH-H_0.8    |
| 7  | -682.91   | 53     | 1.2            | 54      | 1.2             | 1                     | 1      | 0      | (CH <sub>3</sub> COO) H <sub>54</sub>                                                   | CH3COOH-H_1.2    |
| 8  | -745.93   | 70     | 1.6            | 71      | 1.6             | 1                     | 1      | 0      | (CH <sub>3</sub> COO) H <sub>71</sub>                                                   | CH3COOH-H_1.6    |
| 9  | -660.00   | 35     | 0.8            | 37      | 0.8             | 2                     | 2      | 0      | (CH <sub>3</sub> COO) <sub>2</sub> H <sub>37</sub>                                      | CH3COOH_2-H_0.8  |
| 10 | -729.60   | 53     | 1.2            | 55      | 1.3             | 2                     | 2      | 0      | (CH <sub>3</sub> COO) <sub>2</sub> H <sub>55</sub>                                      | CH3COOH_2-H_1.2  |
| 11 | -793.09   | 70     | 1.6            | 72      | 1.6             | 2                     | 2      | 0      | (CH <sub>3</sub> COO) <sub>2</sub> H <sub>72</sub>                                      | CH3COOH_2-H_1.6  |
| 12 | -708.14   | 35     | 0.8            | 38      | 0.9             | 3                     | 3      | 0      | (CH <sub>3</sub> COO) <sub>3</sub> H <sub>38</sub>                                      | CH_3COOH_3-H_0.8 |
| 13 | -777.89   | 53     | 1.2            | 56      | 1.3             | 3                     | 3      | 0      | (CH <sub>3</sub> COO) <sub>3</sub> H <sub>56</sub>                                      | CH_3COOH_3-H_1.2 |
| 14 | -840.62   | 70     | 1.6            | 73      | 1.7             | 3                     | 3      | 0      | (CH <sub>3</sub> COO) <sub>3</sub> H <sub>73</sub>                                      | CH_3COOH_3-H_1.6 |
| 15 | -618.99   | 0      | 0.0            | 4       | 0.1             | 4                     | 4      | 0      | (CH <sub>3</sub> COO) <sub>4</sub> H <sub>4</sub>                                       | CH3COOH_4        |
| 16 | -670.85   | 13     | 0.3            | 17      | 0.4             | 4                     | 4      | 0      | (CH <sub>3</sub> COO) <sub>4</sub> H <sub>17</sub>                                      | CH3COOH_4-H_0.4  |
| 17 | -756.37   | 35     | 0.8            | 39      | 0.9             | 4                     | 4      | 0      | (CH <sub>3</sub> COO) <sub>4</sub> H <sub>39</sub>                                      | CH3COOH_4-H_0.8  |
| 18 | -826.00   | 53     | 1.2            | 57      | 1.3             | 4                     | 4      | 0      | (CH <sub>3</sub> COO) <sub>4</sub> H <sub>57</sub>                                      | CH3COOH_4-H_1.2  |
| 19 | -888.47   | 70     | 1.6            | 74      | 1.7             | 4                     | 4      | 0      | (CH <sub>3</sub> COO) <sub>4</sub> H <sub>74</sub>                                      | CH3COOH_4-H_1.6  |
| 20 | -814.00   | 0      | 0.0            | 8       | 0.2             | 8                     | 8      | 0      | (CH <sub>3</sub> COO) <sub>8</sub> H <sub>8</sub>                                       | CH3COOH_8        |
| 21 | -848.65   | 9      | 0.2            | 17      | 0.4             | 8                     | 8      | 0      | (CH <sub>3</sub> COO) <sub>8</sub> H <sub>17</sub>                                      | CH3COOH_8-H_0.2  |
| 22 | -863.98   | 13     | 0.3            | 21      | 0.5             | 8                     | 8      | 0      | (CH <sub>3</sub> COO) <sub>8</sub> H <sub>21</sub>                                      | CH3COOH_8-H_0.3  |
| 23 | -880.14   | 17     | 0.4            | 25      | 0.6             | 8                     | 8      | 0      | (CH <sub>3</sub> COO) <sub>8</sub> H <sub>25</sub>                                      | CH3COOH_8-H_0.4  |
| 24 | -947.36   | 35     | 0.8            | 43      | 1.0             | 8                     | 8      | 0      | (CH <sub>3</sub> COO) <sub>8</sub> H <sub>43</sub>                                      | CH3COOH_8-H_0.8  |
| 25 | -1,014.50 | 53     | 1.2            | 61      | 1.4             | 8                     | 8      | 0      | (CH <sub>3</sub> COO) <sub>8</sub> H <sub>61</sub>                                      | CH3COOH_8-H_1.2  |
| 26 | -1,074.53 | 70     | 1.6            | 78      | 1.8             | 8                     | 8      | 0      | (CH <sub>3</sub> COO) <sub>8</sub> H <sub>78</sub>                                      | CH3COOH_8-H_1.6  |
| 27 | -912.05   | 0      | 0.0            | 10      | 0.2             | 10                    | 10     | 0      | (CH <sub>3</sub> COO) <sub>10</sub> H <sub>10</sub>                                     | CH3COOH_10       |
| 28 | -976.91   | 17     | 0.4            | 27      | 0.6             | 10                    | 10     | 0      | (CH <sub>3</sub> COO) <sub>10</sub> H <sub>27</sub>                                     | CH3COOH_10-H_0.4 |
| 29 | -1,043.37 | 35     | 0.8            | 45      | 1.0             | 10                    | 10     | 0      | (CH <sub>3</sub> COO) <sub>10</sub> H <sub>45</sub>                                     | CH3COOH_10-H_0.8 |
| 30 | -1,106.51 | 53     | 1.2            | 63      | 1.4             | 10                    | 10     | 0      | (CH <sub>3</sub> COO) <sub>10</sub> H <sub>63</sub>                                     | CH3COOH_10-H_1.2 |
| 31 | -1,168.13 | 70     | 1.6            | 79      | 1.8             | 10                    | 9      | 1      | (CH <sub>3</sub> COO) <sub>9</sub> (CH <sub>3</sub> COOH) H <sub>79</sub>               | CH3COOH_10-H_1.6 |
| 32 | -1,009.28 | 0      | 0.0            | 12      | 0.3             | 12                    | 12     | 0      | (CH <sub>3</sub> COO) <sub>12</sub> H <sub>12</sub>                                     | CH3COOH_12       |
| 33 | -1,072.83 | 17     | 0.4            | 29      | 0.7             | 12                    | 12     | 0      | (CH <sub>3</sub> COO) <sub>12</sub> H <sub>29</sub>                                     | CH3COOH_12-H_0.4 |
| 34 | -1,137.82 | 35     | 0.8            | 47      | 1.1             | 12                    | 12     | 0      | (CH <sub>3</sub> COO) <sub>12</sub> H <sub>47</sub>                                     | CH3COOH_12-H_0.8 |
| 35 | -1,204.67 | 53     | 1.2            | 65      | 1.5             | 12                    | 12     | 0      | (CH <sub>3</sub> COO) <sub>12</sub> H <sub>65</sub>                                     | CH3COOH_12-H_1.2 |
| 36 | -1,262.42 | 70     | 1.6            | 80      | 1.8             | 12                    | 10     | 2      | (CH <sub>3</sub> COO) <sub>10</sub> (CH <sub>3</sub> COOH) <sub>2</sub> H <sub>80</sub> | CH3COOH_12-H_1.6 |
| 37 | -1,106.85 | 0      | 0.0            | 14      | 0.3             | 14                    | 14     | 0      | (CH <sub>3</sub> COO) <sub>14</sub> H <sub>14</sub>                                     | CH3COOH_14       |
| 38 | -1,168.63 | 17     | 0.4            | 31      | 0.7             | 14                    | 14     | 0      | (CH <sub>3</sub> COO) <sub>14</sub> H <sub>31</sub>                                     | CH3COOH_14-H_0.4 |
| 39 | -1,202.18 | 0      | 0.0            | 16      | 0.4             | 16                    | 16     | 0      | (CH <sub>3</sub> COO) <sub>16</sub> H <sub>16</sub>                                     | CH3COOH_16       |
| 40 | -1,235.95 | 9      | 0.2            | 25      | 0.6             | 16                    | 16     | 0      | (CH <sub>3</sub> COO) <sub>16</sub> H <sub>25</sub>                                     | CH3COOH_16-H_0.2 |
| 41 | -1,264.48 | 17     | 0.4            | 33      | 0.8             | 16                    | 16     | 0      | (CH <sub>3</sub> COO) <sub>16</sub> H <sub>33</sub>                                     | CH3COOH_16-H_0.4 |
| 42 | -1,326.98 | 35     | 0.8            | 51      | 1.2             | 16                    | 16     | 0      | (CH <sub>3</sub> COO) <sub>16</sub> H <sub>51</sub>                                     | CH3COOH_16-H_0.8 |
| 43 | -1,391.54 | 53     | 1.2            | 69      | 1.6             | 16                    | 16     | 0      | (CH <sub>3</sub> COO) <sub>16</sub> H <sub>69</sub>                                     | CH3COOH_16-H_1.2 |
| 44 | -1,449.19 | 70     | 1.6            | 84      | 1.9             | 16                    | 14     | 2      | (CH <sub>3</sub> COO) <sub>14</sub> (CH <sub>3</sub> COOH) <sub>2</sub> H <sub>84</sub> | CH3COOH_16-H_1.6 |

(a) Number of hydrides that come only from the dissociative adsorption of H<sub>2</sub>

(b) Total number of hydrides, i.e. that come from the dissociative adsorption of H<sub>2</sub> and from CH<sub>3</sub>COOH

63

```

-./_Model_1COOH_472.13976406.xyz
Ru 11.07601281969288 9.28375286938952 9.64262095429748
Ru 12.33716817368049 11.480963622274644 9.98999971377968
Ru 12.37741601832162 6.97209759395201 9.19450598935777
Ru 13.48033116468226 13.69138026863234 10.3385896455873
Ru 13.419796925667 0.03879401580595 4.44503128712020
Ru 12.20115085269931 8.85645156408889 7.41674589131923
Ru 13.62342188231989 9.29942102125659 9.51028385621674
Ru 12.44658846730270 8.15115695372516 11.44820092847402
Ru 13.89232467892823 8.49230604120504 13.51178161910180
Ru 14.56653146246980 12.34889789322135 5.77138572239983
Ru 13.419329557739 11.16478488390854 7.710837998115
Ru 14.92820533997459 11.64592676681506 9.8430810110278
Ru 13.72741769236985 10.41179992313168 11.83461633943451
Ru 15.08059360510069 10.79949139047559 13.95230517802439
Ru 14.66236167120492 13.43318432409488 8.06958260413475
Ru 16.10796844679998 13.93202741930397 10.99055082144356
Ru 14.97621557082528 12.70957909106681 12.130587196785555
Ru 13.76349994250215 4.85190952742307 8.7130986421042
Ru 14.67811303661796 7.82954867846371 4.95927146398242
Ru 13.54603588474280 6.69135009910592 6.91324527025295
Ru 14.97985139242803 7.06167930460430 8.98751995057485
Ru 13.89029769451319 5.94455939854245 10.97125203945317
Ru 15.3513342523535 6.3425756723518 13.0921945040994
Ru 15.8966962037681 10.16364182377587 5.18255137990022
Ru 14.82057681803079 9.01288180542226 7.17759184115188
Ru 16.31187783348464 9.42523576917464 9.32884688634772
Ru 15.15060805452128 8.18312304684088 11.39148574985509
Ru 16.48798482054174 8.66573992169356 13.49031652925322
Ru 17.13689591568718 12.38042864569469 5.421562822338
Ru 16.11515700248746 11.30413414623887 7.46606358487340
Ru 17.60385879761155 11.84186325075682 9.67539905370359
Ru 16.40088418486776 10.53521750312460 11.73447090210798
Ru 17.78977613639120 10.87543987471557 13.79830952612692
Ru 17.27159837429449 13.52308086102873 7.84953844920359
Ru 17.51478025639660 12.79972481882222 12.92335211099422
Ru 16.53090781529511 4.93443953698099 8.576905324241
Ru 15.29276537239453 3.85155929139257 10.3980949662851
Ru 17.22189355877682 7.92689455484190 4.73622710654810
Ru 16.22711409493020 6.76513404743771 6.73003469840550
Ru 17.74365178538973 7.23134789938798 8.85387949515283
Ru 16.52094350712805 5.98157711158028 10.86356879888891
Ru 17.05132447094802 6.52779845575891 12.27812735105245
Ru 18.48366893634192 10.26551726318052 4.9566028487561
Ru 17.46417897677875 9.08864875756523 6.9386274868256
Ru 19.04491361054717 9.56969437266578 9.15041965485357
Ru 17.82116835709664 8.43978931271430 11.23578915970906
Ru 19.07414441676738 8.78113756811568 13.37879668966634
Ru 18.65483490662227 11.35480470058005 7.3142629362328
Ru 18.07487094464273 10.68703486571168 8.687037619184
Ru 18.94173516514441 5.04424404310591 8.35656832413662
Ru 18.79333853973226 6.87821582469963 6.57466113504570
Ru 20.29510328291958 7.34171622074426 8.62544049212437
Ru 19.15506295532721 6.18964928277654 10.65347335236291
Ru 20.01525983206556 9.150939686060524 6.8624689189077
Ru 19.30915134775310 8.41111036093941 11.04209237985330
C 14.35047811813502 10.75913604583237 18.32785354952870
C 14.68789854633208 10.36094491805664 16.92723610082916
O 15.02885495709508 9.09664395151185 16.77374060795636
O 14.63860844117637 11.18612277784209 15.97950864755235
H 14.09266428159936 11.82068026162287 18.36971487741751
H 15.20437675241714 10.54980808909809 18.90697849512568
H 13.50934926455246 10.15083542571951 18.6891227919116
H 15.2124960099834 8.91818208543252 15.77653015073104

```

63

```

-./_Model_1COO_H_473.58986934.xyz
Ru 11.23115260898545 9.47337373101749 10.19487314382279
Ru 12.50499709951831 11.63809135411501 10.37475178233317
Ru 12.39648704973296 7.14299237091653 9.63434680910711
Ru 13.80999738598598 13.82376488097480 10.57739396098594
Ru 13.06224913634248 10.06533549629255 5.79771283500230
Ru 12.13570267556022 8.98308620864140 7.86721504336599
Ru 13.75134819326731 9.40814948180150 9.82049473526790
Ru 12.7291333977396 8.33683496777804 10.87397217130725
Ru 14.7517237956429 13.49512217133767 8.225493867933
Ru 14.38584837786905 12.32551787068078 9.6946406536079
Ru 13.44412194196483 11.26503843626183 8.02477756951028
Ru 15.15863543384402 11.72709272316129 9.99387449423839
Ru 14.12073227806337 10.56138385487959 12.11476848386850
Ru 15.66109945618324 10.9883998524192 14.07286190928445
Ru 14.094362675418621 13.49512217133767 9.20096240997451
Ru 16.4204885651660 13.97541112472869 10.13270371908548
Ru 15.43048578536314 12.82302209137970 12.25701121905129
Ru 13.68857320471538 4.95746098201140 9.04436234337702
Ru 14.33938745096981 7.86156247042088 5.18391373337894
Ru 13.3806909433617 6.77633031988713 7.26258409085819
Ru 14.7517237956429 13.49512217133767 9.20096240997451
Ru 14.01784264465826 10.093895907460 11.27211894610729
Ru 15.57721373577019 6.47190808242531 13.24515213625792
Ru 15.65720133914276 10.14557052812966 5.26330102453885
Ru 14.73641560967680 9.04447057911128 7.37694931568189
Ru 16.41177669299724 9.46831955255254 9.36781164675816
Ru 15.391800186145724 11.548180327000629 9.09642865350146
Ru 16.90260903736799 7.3550908958796 13.52780795966639
Ru 16.98202517486105 12.3402561631265 5.39799796027618

```

```

Ru 16.07487245942291 11.31534688367459 7.48467351522019
Ru 17.80630557693898 11.83341527749924 9.58763477134394
Ru 16.76855308455362 10.60214755416512 11.72008026973349
Ru 18.25968620932782 10.94295145706739 13.68470402366385
Ru 17.32363317354178 13.50503264753490 7.78612674033635
Ru 17.96081520621180 12.844096161935298 11.90621669720984
Ru 16.42661489015400 4.96429738661802 8.70257661802
Ru 15.31240277449097 3.94633890311149 10.63816886573860
Ru 16.87266836801935 7.87560175892216 4.74467191972758
Ru 16.01707896704110 6.77503792306748 6.83449937585135
Ru 17.71630796648230 7.21850416423156 8.9710384717507
Ru 16.65019331357420 6.0390801716014 10.96754091641413
Ru 18.251279398398115 7.710837998115 6.54902589586463
Ru 18.21456566153399 10.22514216341148 4.85373514684105
Ru 17.34084439754092 9.07692611323848 6.88288154807056
Ru 19.12022278639365 9.51797117431255 8.97543449961697
Ru 18.06008058266560 8.43308791986651 11.18989596808618
Ru 19.47687036486956 8.78644566471742 13.19928456751073
Ru 18.62190604067646 11.29358402637852 7.15316421439640
Ru 19.30097994164879 10.65386709308518 11.36520040727735
Ru 18.82022610817353 5.00171887348846 8.22098473257942
Ru 18.57343505097124 6.81052200807287 6.44716411956534
Ru 20.24791125293938 7.24768673041375 8.39265736871105
Ru 19.22565890326366 6.149484537528459 10.50585706464087
Ru 19.87081061374525 9.05319920156576 6.6092005999941
Ru 20.50576247050809 8.34811973135382 10.74376633994796
C 13.24771815577873 10.61164316768746 17.66917703811207
C 13.86894165807290 10.33515253574261 16.32974450071961
O 13.54343214728610 9.25732571443313 15.71387269040667
O 14.69723252311764 11.20173709575163 15.86926200099463
H 12.92239075235327 11.65892831952431 17.71742559297928
H 14.00532151677665 10.46729280170304 16.45480097910426
H 12.4058082627548 9.93846303200925 17.8519903263900
H 17.06805018639284 7.00172725195261 14.33869593241451

```

63

```

-./_Model_1TS_471.89777148.xyz
Ru 11.07971066120609 9.27469889536402 9.7266762719006
Ru 12.34443099748013 11.4774805525325 10.03744405639080
Ru 11.88413674743278 6.98539849501226 9.22936840546077
Ru 13.47882030958878 13.69386059443762 10.33483455045731
Ru 13.29963558221908 10.04904130645537 5.49419488077592
Ru 12.18814162450930 8.87155231800372 7.48100224615713
Ru 13.62367602620204 9.28532753727275 9.558060924029102
Ru 12.46401802185362 8.13696509490663 11.512320331330
Ru 13.91277004132933 8.50882835916171 13.5638088760426
Ru 14.586870439337 12.33845636893051 5.82910479339654
Ru 13.41697622694235 11.16815827742084 7.76523470408824
Ru 14.93850169068345 11.65258369750729 9.86046960604641
Ru 13.74629919628302 10.411442286336364 11.87146528603155
Ru 15.09583557451387 10.88361961164500 13.94626483516661
Ru 14.545497551204 11.523837619184 4.447272324985
Ru 16.12540441352753 13.91144474445474 10.17774015745271
Ru 14.97890931134615 12.69971056788749 12.15255290846795
Ru 13.75460852980952 4.85345475294441 8.76003425842167
Ru 14.62907175062908 7.83396132734167 4.99023628066978
Ru 13.53802096094616 6.70163019820330 6.95279225291197
Ru 14.00627023230404 7.06601615749581 9.02215611942210
Ru 13.90317636420967 5.95877437382437 11.0148917275432
Ru 15.40322062290842 6.35327282292470 13.12838012976310
Ru 15.87726645289534 10.13812674177881 5.19749297002143
Ru 14.81485729984962 9.00200468112538 7.21127613788975
Ru 16.31204343613354 9.41610727759438 9.35471990992611
Ru 17.0032225170408 10.89598084896307 13.81361607346658
Ru 17.25418301552074 13.50776100213278 7.0767231937548
Ru 17.56138237917162 12.8136737093472 12.02193334955706
Ru 16.52661536270388 4.93891644339036 8.58718768187243
Ru 15.29734914571236 3.84944794933985 10.4166947230661
Ru 17.19584427718426 7.93854658319470 4.75013963304070
Ru 16.21511807449920 6.77533179655210 6.74081815462052
Ru 17.0211471687892 8.255897095254 8.85679095254
Ru 16.52457165177647 5.98188815451804 10.87778837262803
Ru 17.95907701562985 6.5309486012401 12.88326836225271
Ru 18.45555600566884 10.30105981345474 5.00296441183613
Ru 17.46081394020273 9.0972724102723 6.94048030294484
Ru 19.05542047148960 9.56406427650123 9.17477391760812
Ru 17.8308408394906 8.4397006200082 11.23146239403543
Ru 19.07364193819866 8.79908551689175 13.3079551012019
Ru 18.67348598311085 11.34106014417060 7.35085241262422
Ru 18.99246182779612 10.68214498954396 11.56637362891771
Ru 18.93694687569202 5.04314475906021 8.34975310740638
Ru 18.79447779950286 6.87459518617516 6.57213857088036
Ru 20.28727570504006 7.23909210768908 8.65142323040345
Ru 19.15553420686301 6.18246158408420 10.6618521691811
Ru 20.00656446921182 9.13993806523007 6.87879982564681
Ru 20.32415353622264 8.40565836395712 11.06351411935347
C 14.31823476651021 10.69847389894589 18.19076649860787
C 14.6541154026082 10.31982019964844 16.77617445277274
O 14.809017430696309 9.09642865350146 16.50620040727735
O 14.68327421993620 11.2735067042511 15.913957980041
H 14.06481362869200 11.76158563478518 18.24424936975744

```

H 15.18261536339446 10.49015812404553 18.83633965600872  
H 13.48138279576007 10.08848785602689 18.55419244870108  
H 15.21463150355007 9.00656349858119 15.17822712515372

192

./\_Model\_2\_-1217.56438766.xyz

Ru 15.148677792986450 12.69126399438274 15.67982818366258  
Ru 15.12229209796338 12.68525641725055 11.33427938170476  
Ru 15.16792585459864 11.13338029506685 13.47303591665101  
Ru 13.78324312665883 14.97453756439840 15.81255990830758  
Ru 13.67169209220113 15.01302156178548 11.43246627733658  
Ru 12.41832689063042 12.56484131354101 15.69822898678403  
Ru 13.81775231966333 13.44658577084173 15.58689671888990  
Ru 12.3814718552142 12.68322904108662 11.38676516639096  
Ru 12.37486577550283 10.98026234076205 13.52074603242633  
Ru 12.45214786855959 15.74452961447926 13.63744567867148  
Ru 11.13352912220705 13.31241665830752 13.56453257013521  
Ru 8.5380571640186 13.42952243330507 13.553058523154636  
Ru 9.71420093405979 15.49778162449357 13.76621100340484  
Ru 9.61191217304935 10.94508339151590 13.6984323424642  
Ru 10.86908022500342 17.73638019094821 13.62885061604040  
Ru 10.93826141552923 13.29743253164986 9.38699681408823  
Ru 9.83176477932899 12.46880263375414 11.59925242761839  
Ru 9.84828622711342 12.54086641382050 15.72538505311061  
Ru 11.20010629343555 13.25859161350914 17.76210742256626  
Ru 12.3776125582757 15.62212245437937 9.4156435523216  
Ru 18.97517508057777 14.93418106785544 11.51664356096866  
Ru 11.10012211420045 14.83548877265804 15.71309208973150  
Ru 12.45255818530588 15.51719496918463 17.89086641941988  
Ru 12.25236299931706 17.31635392160820 11.54453626943413  
Ru 13.65740144010498 18.11216256141035 13.66980931201694  
Ru 12.37663492161387 17.18906789526920 15.76195251604051  
Ru 11.189766764753262 8.6868294794376 13.62835003948079  
Ru 12.30870996904796 11.23372343697251 9.22661154526464  
Ru 11.06477617966032 10.33807882278566 11.44263146827254  
Ru 11.21746475884658 10.19492823021868 15.71533912094823  
Ru 12.64817517007894 11.00897856094330 17.7955520519375  
Ru 13.66153602481047 13.51834845964399 9.26675966920952  
Ru 13.84256591093792 13.36463531363662 17.78727734721117  
Ru 15.8909431358880 15.71583340875405 9.22612430258644  
Ru 15.03774682140943 15.74897275524745 13.53438629735123  
Ru 15.05911903325637 15.71866015769469 17.8358526671740  
Ru 15.00836735117738 17.24710647660097 11.43461975669593  
Ru 15.0282463977958 17.24055023532875 15.68290271633263  
Ru 13.07881037385187 8.8157387810445 13.4944060307753  
Ru 12.99486815085477 8.02768778618450 15.60838364023148  
Ru 15.04939563573988 11.19908064611279 9.1678667032603  
Ru 13.7148341028910 10.33874041358699 11.2777499664109  
Ru 13.84117959562031 10.32926065298002 15.66232141458245  
Ru 15.19439826138458 11.13263476608041 17.75499558018005  
Ru 16.324184201838 13.4807803688548 9.1781490836604121  
Ru 15.565093168890 13.4567792065943 13.4559261688681  
Ru 16.49135477407285 13.41554011536130 17.74033463597948  
Ru 16.31465709526466 15.05382641211353 11.27812599197305  
Ru 16.42905342467103 15.02317382369277 15.66255112343330  
Ru 16.28570230566311 8.81064938128794 13.53671718638424  
Ru 16.41121231674772 10.38086761276846 11.28377756718310  
Ru 17.0445902911492 10.96535973378761 13.38018095121368  
Ru 16.5291735920132 10.48753925540145 15.56070367016533  
Ru 17.71431363836679 12.83748938764073 11.33670002557373  
Ru 17.79998272900321 12.6371717553220 15.4795551736033  
C 5.16921452707271 10.76402016413462 13.44711459920135  
C 1.569344880895949 11.31444638939271 13.59557463798302  
C 17.89797096319525 11.14672958521219 21.2060460806865  
C 17.20740867168168 11.54824837690022 19.93095809634159  
C 20.53884765697492 13.07015154216335 7.99103345552405  
C 19.28357104126425 12.97089472791805 8.82008867472347  
C 7.22923566206540 15.66027647959738 9.23580429854856  
C 8.55787639113565 15.08485536962832 9.65197927680442  
C 9.72391491194443 20.460671903420046 15.83927462315081  
C 10.36715907896975 19.33053915035251 16.08292075698101  
C 19.20415707285501 18.12850408607292 14.4296975313377  
C 17.98739762144125 17.39558481419856 14.92329274373340  
C 16.26417266001720 5.11566682204916 15.98600286092337  
C 15.58070463475569 6.346456093934652 15.44523771365240  
C 13.51067632636412 8.92000669876247 5.72403634902992  
C 15.5045350047530 7.4256768874904 9.8031265216260  
C 21.9919736924400 11.61874143996994 14.7061905054826  
C 20.49121191125322 11.67755239483379 14.58955248875610  
C 8.73206063193933 6.70122476017876 10.61074069936064  
C 9.66075288724073 7.68323577140918 11.27427083000992  
C 9.06194291791543 9.19860163473390 19.49308610435156  
C 15.0044513978516 9.06798319087852 18.50148128502582  
C 15.8324720119844 19.80662173285793 7.99673435472931  
C 15.5873777859917 18.63708100491690 8.82526630913232  
C 16.27503664129386 19.76712294259296 19.07019736509062  
C 15.77796291672853 18.58486082790602 18.27515231313721  
C 12.63057905267203 21.70422219182843 11.40241836497970  
C 12.74187486724686 20.2578507914534 11.0051229504458  
C 12.97527914945030 15.03226719684255 5.16133660086098  
C 13.03471876302039 14.90295617972973 6.66031882103132  
C 6.68685905655728 12.54384302211840 13.92427143987420  
C 7.53390412534388 10.53847983458366 13.25119957582779  
C 17.4612736355732 12.69706785166139 19.43943597349818  
C 16.3040543237285 10.7151797709094 19.4087249806653  
C 18.17765974369263 13.26913481996166 8.2384634375126  
C 19.38878025999914 12.61754288388121 10.03780576681170

O 9.14663972085348 15.62874076074390 10.64667197204230  
O 9.00259420820534 14.07644529189029 8.99796572601044  
O 11.08331137296084 18.49712296296534 16.74049321756693  
O 10.18006531135999 19.27545394692066 14.81606516018834  
O 16.92104687334059 18.06369396975221 15.13479525857809  
O 18.089362983088 16.127433941814278 15.09418147693029  
O 14.4771115803061 16.039194454546 16.0130606576954  
O 16.14223424636083 6.93861479605768 14.47025411156740  
O 14.72709715009519 9.95305313387928 7.50534078561442  
O 12.47385600252012 10.17590287233561 7.46275613011832  
O 19.87570721606540 12.48590030377854 15.37792582045492  
O 19.92318996726051 10.91609652254275 13.7425673228609  
O 10.1579729562185 7.36618589876527 12.4080992813012  
O 9.88967106608854 8.78888581822231 10.67591795829748  
O 9.88577380347322 9.47667240336381 17.26458578529648  
O 11.13223675875498 10.26476993366069 18.97984773679965  
O 15.49232587382387 18.84604653177540 10.07302136171259  
O 15.48195195801460 17.48115722125570 8.25341509924748  
O 15.80740856416694 17.42640015936381 18.80760117220208  
O 15.29406420049808 18.80920798027817 17.11545483380442  
O 12.17585114984785 19.38407319313535 11.06997150076574  
O 13.37386015675250 19.9944255049183 12.88871821678538  
O 12.715070828399236 15.94259938463169 7.34865064187020  
O 13.37820661080002 13.78096420860956 7.15761241424204  
H 9.11739552211272 17.151955239126 13.4457187168193  
H 11.02214318046869 15.02547812585299 8.77485163179903  
H 8.1770992000275 13.15151433313892 11.81612508751977  
H 8.94068463239365 11.00973044918215 15.30268461773961  
H 15.29194708284699 18.25597646488177 12.81256427622004  
H 13.16082998473582 18.73039261607996 15.21374866533882  
H 12.56416570966107 9.46530174228163 10.36609457656809  
H 13.92499054318928 10.20442995112666 17.79939324664650  
H 16.75333441479506 16.76599201873613 11.58671436019993  
H 12.52764634126115 7.54670873567390 13.51548164471556  
H 15.76553888311194 12.28490089106651 7.96610787725340  
H 16.66643409987195 10.50543528866977 9.46771420311986  
H 15.2208533679927 14.09284049992428 18.88819245626648  
H 15.0491113565180 15.32611560907574 17.39038088159909  
H 18.26401460199395 12.76890916835207 13.08722130874303  
H 17.80507732028664 9.50800042138147 14.48871666089169  
H 5.16550412554275 9.68171153765991 13.61499967534692  
H 4.79481850887449 10.95695112339538 12.43032028337542  
H 4.50419241292645 17.2718320430247 14.1550363136599  
H 18.13067040535284 10.0764373041723 21.13806371713802  
H 17.21427362058712 11.32462321309092 22.04971154408546  
H 18.8035248294123 11.74318285840307 21.35821024854580  
H 21.31625290717335 12.41343050324522 8.3959370403334  
H 20.90447087961979 14.10728186906806 8.03240680590254  
H 20.3285554742253 12.82676414342964 6.94367124398915  
H 6.972397917143030 15.34048664014121 8.21822121810264  
H 9.4597037788089 13.4559261688681 13.814001231745653  
H 6.45565458537196 15.29415225240830 9.92732043693281  
H 8.80355328460959 20.78397858198947 16.34104244040656  
H 10.42287160599937 21.3105664415363 16.85990446945740  
H 9.52267714541783 20.16091521846417 17.87346579632062  
H 20.11923574973648 17.64536793450961 14.78996044297953  
H 19.17000421743871 18.020191524164585 18.003911549645025  
H 19.20406676889099 18.00451059859592 13.32999166740639  
H 16.47016772780058 4.4184378414095 15.16278614306308  
H 15.65051379863768 4.62890001470303 16.75007924166691  
H 17.23296099710101 5.40393960910815 16.41856802944290  
H 12.94105848589814 9.46816324971729 4.96178164847793  
H 12.96590281542540 7.98810875586313 5.93070266272446  
H 14.51334652554477 8.68637883948666 5.35372087955461  
H 18.05598445389320 14.54676370925751 11.18683519499519  
H 17.15511483317806 8.86495535202237 12.02538900807521  
H 13.72263433368649 16.97408037861274 10.00645528280354  
H 10.68405663749347 15.14284390641470 17.54161987444273  
H 11.3293251447389 17.1703853825633 10.04606514660037  
H 13.71007635574158 16.23309357608878 18.92388723571500  
H 9.50219316930040 12.7371671061675 17.47911320886286  
H 18.10128091914941 10.94641143749291 11.46997469953802  
H 22.42910923682879 11.13078581627981 13.82936497985441  
H 22.25649760613486 11.04394581133763 15.60857787279261  
H 22.39671930814516 12.6304305764016 14.33069695629161  
H 5.44055967059566 9.24072670212193 14.0594584424292  
H 8.78252842087156 6.80068287454749 9.52096093881603  
H 7.70326894856191 6.9299808059918 10.92809532244866  
H 8.96676038065150 5.6774014194209 10.92168303591012  
H 18.18206028559828 13.21206939738098 17.03587556880807  
H 15.04996059690823 9.57550957668095 10.35821605461430  
H 9.54461528903068 8.0545335658089 20.41527000000000  
H 8.4440370883544 8.40633854370659 19.05785764469428  
H 8.41148592728826 10.04835606933030 19.7494117170324  
H 16.12098040886391 14.84284622508370 8.06515249712985  
H 16.59985345824386 19.55076195951636 7.16572430004804  
H 16.13067157120965 20.69030318447536 8.47957395911217  
H 5.44055967059566 9.24072670212193 14.0594584424292  
H 8.78252842087156 6.80068287454749 9.52096093881603  
H 15.76469035949575 20.68231043263813 18.75085675611065  
H 17.35146528722274 19.89011915918210 18.87940212882393  
H 16.13689480780657 19.59622802823464 20.1436205241069  
H 10.68814011649231 11.74096053259773 6.66801228144974  
H 13.429750765337285 19.4087249806653 11.052309222189  
H 11.66170903864129 22.09368931693533 11.74945485468524  
H 12.65816146771991 21.79541762867405 10.3105841672400

H 16.0787515226990 9.49116554233645 16.83561719077609  
H 13.59310103874372 14.26467087608594 6.68444100478544  
H 13.29611357874269 16.03522734776984 4.85640352540456  
H 11.93209061126026 14.89956045778623 4.83755398476516  
H 13.88066141907166 8.61623738088711 11.76885982234252

295

/ Model\_2\_AdsorptionTHF\_1290.09489327.xyz  
Ru 15.16815926855617 12.71832196703852 15.68506705977967  
Ru 15.12484381293919 12.69950957394347 11.33171663782793  
Ru 15.15272621098321 11.15749214296566 13.48138360425024  
Ru 13.77865957043998 15.00904081995625 15.79501635217989  
Ru 13.68227015198991 15.03815130843852 11.42278640816069  
Ru 12.40893104825960 12.60176623381322 15.69349095043933  
Ru 13.81788947361157 13.47913931515686 13.58244526493179  
Ru 12.38816813198741 12.70931422758845 11.37782069134572  
Ru 12.35393561743128 11.01126174789298 13.51376409359763  
Ru 12.46390102379925 15.78421063303809 13.61679808946785  
Ru 11.13591789911869 13.34818389375747 13.55178552137242  
Ru 9.54360404303391 13.47494450717633 13.53741067257473  
Ru 9.72032599920111 15.53586389749555 13.73782858098966  
Ru 9.59853664045490 10.98113949321066 13.67942203413531  
Ru 10.88632026558289 17.77330190395719 13.59184292864474  
Ru 9.94121651409620 13.32020015700038 9.37781455059786  
Ru 9.83446226842522 12.50935543785159 11.57951929781843  
Ru 9.84717072761440 12.57741107523137 15.68736987899865  
Ru 11.15888413993801 13.3204899277105 17.78736987899865  
Ru 12.38979753757507 15.83804247179453 9.40065197645148  
Ru 10.9855458859006 14.96424991456793 11.49588734466287  
Ru 11.10090427572126 14.88258586190422 15.69555713838756  
Ru 12.45475966024820 15.57767819582149 17.85545654577196  
Ru 12.27345188797874 17.34630174846624 11.50876435024653  
Ru 13.69256899744203 18.13869630011621 13.63608191134887  
Ru 12.38353127918435 17.23221406454914 15.73334688660822  
Ru 11.17168193657812 8.72122504837803 13.63178506683101  
Ru 12.30469703899754 11.25405239273266 9.21903165868526  
Ru 11.04974552739356 10.37774335038626 11.43676053117376  
Ru 11.18826782695809 10.24703781409674 15.71173026135782  
Ru 15.2631809529282 11.07806343176849 17.80161027408783  
Ru 13.67539258639218 13.53086823524159 9.25584400748440  
Ru 13.82093674675927 13.40710225852720 17.78262873634936  
Ru 15.10435253046977 15.72191017697020 9.20775171021866  
Ru 15.04950125581367 15.77635925557430 13.51678376583853  
Ru 15.05634247609577 15.75286028483398 17.84771102929727  
Ru 15.0832304901559 17.2582836765705 11.40963129773505  
Ru 15.93623391353395 17.26719879476951 15.65750657937935  
Ru 13.86577578238165 8.84649980668507 13.50257872191488  
Ru 12.95562246402167 8.05111129352644 15.61004481205175  
Ru 15.05503572896084 11.20125245077069 9.17058411019161  
Ru 13.70515912477113 10.36664314277359 11.279964565805151  
Ru 13.81083344118033 10.35517463570702 15.67123398176393  
Ru 15.15066171539637 11.17251194223318 17.761494987856410  
Ru 16.32856607251606 13.47969211988865 9.17105392738169  
Ru 16.46809052829801 13.46545484171224 13.45619728420562  
Ru 16.46947037937860 13.44195063693574 17.74725761738696  
Ru 16.32563164080860 15.05419242539402 11.26474294095716  
Ru 16.42742035907317 15.94110592367842 15.65508639917649  
Ru 15.8301809152899 16.83081271459342 13.546718209402991  
Ru 16.39809076687053 10.38498957663222 11.29707644642272  
Ru 17.83133647120241 10.98336386833938 13.40147827165903  
Ru 16.5013634467895 10.51399913975108 15.57231515099148  
Ru 17.71415855174946 12.8395622641141 11.33526997522804  
Ru 17.78538464139194 12.65175768192108 15.49191976631191  
C 5.14427297305096 10.8485731214029 13.4806080659322  
C 6.55254899267337 11.38276038027741 13.57122648969712  
C 17.85271748259978 11.14730757943374 21.21355973172146  
C 17.15428723431763 11.56519816698150 19.94674613039979  
C 20.53621797012161 13.00653162523253 7.978958080805038  
C 19.28028797068201 12.93139517279034 8.81033151558965  
C 7.19080782924573 15.64064053406420 9.26737432351032  
C 8.5521225348691 15.09662877134113 9.64855728525187  
C 9.74278806014185 20.53042513853359 16.78225977045621  
C 10.38164229763932 19.38830030667581 16.03823263691890  
C 19.2333392872532 14.260894517962 14.35293887751808  
C 18.00747223682918 17.40611768482751 14.92768874496859  
C 16.262812361765734 15.18134187942182 16.05738876566496  
C 15.16405088080651 307852174739561 15.4832370810901  
C 13.52281654960132 8.85097348049095 5.7707801868086  
C 13.59203634878002 9.71384003865995 7.00892660176480  
C 21.97902681908743 11.63522838083522 14.72142174927574  
C 20.47760499895256 11.69041017339013 14.60674286903743  
C 8.81510437395953 6.6878280428631 10.56593932471898  
C 9.718632376125195 7.6825278418380 11.24569105971486  
C 9.04703937836608 9.1934407577045 19.49457444373006  
C 10.07075843753408 9.68782339424695 18.50338579290983  
C 15.81676345109382 19.81163678711662 7.86430844002300  
C 15.58492362080648 18.64432200724092 8.78993029975197  
C 16.26109587633193 19.80989699262263 19.04787752256744  
C 15.77602155907351 18.6215502119569 18.251328332024  
C 12.67057127493935 21.73243505747782 11.3096449544108  
C 12.77003007218725 20.28661886670400 11.77803122841095  
C 12.95055734978086 15.01798508150916 5.14566281837785  
C 13.03005292205581 14.90183260597804 6.64538038957731  
C 8.9823070731837 14.29602369426976 19.96072785998780  
C 16.161531283539 15.1395287214923 21.2510214606642  
C 10.0903465747866 14.26001555235782 22.07339848822193  
C 11.03873378869159 13.67955890167968 11.03302711060589

O 6.68648789959837 12.61171302976155 13.93684932943421  
O 7.50355104502515 10.59640008984754 13.25449837082229  
O 17.42546303622642 12.70825085954166 19.45229017897034  
O 16.30979357467312 10.74639212796202 19.43486207026035  
O 18.17938095414226 13.24534527345415 8.22797845214675  
O 19.3812614495215 12.58157729337473 10.0292766679425  
O 1.15046356700626 15.65110334949128 10.6318415170560  
O 0.00139433368457 14.09777843479984 8.98408249996222  
O 11.09368693699041 18.56087801520447 16.70552358834420  
O 10.19252811204051 19.32047055676059 14.77282010976073  
O 16.94609629662323 18.0775464403833 15.12793511357725  
O 18.09941408808951 16.13204032307367 15.09281009312219  
O 14.45552329232044 6.73946030850276 16.00474409470686  
O 0.00139433368457 14.09777843479984 8.98408249996222  
O 11.09368693699041 18.56087801520447 16.70552358834420  
O 10.19252811204051 19.32047055676059 14.77282010976073  
O 16.94609629662323 18.0775464403833 15.12793511357725  
O 18.09941408808951 16.13204032307367 15.09281009312219  
O 14.45552329232044 6.73946030850276 16.00474409470686  
O 16.11749730976240 9.96079398587524 14.49318618573326  
O 14.73455551412381 9.92384634652413 7.5350089884971  
O 12.48381485173284 10.17144039467171 7.46609174950781  
O 19.86178003718995 12.4925765668510 15.401146130084173  
O 19.91160863235778 10.93435728441290 13.75382846028038  
O 10.20756206764587 7.3640541852145 12.3036110646264  
O 9.93480190905790 8.79477093718894 10.65368049258465  
O 9.8528293790016 9.51541746347573 17.26639891898312  
O 11.10709939378211 10.28142659797722 18.98787382644746  
O 15.49112963572618 18.8606466077648 10.03616088676663  
O 15.4890898339071 17.48417996504832 8.22402693794385  
O 15.95492327712460 17.46609592132086 19.70940307976163  
O 15.29982581265088 8.84178256748311 17.0888573483589  
O 12.16992477119517 19.4177853375287 11.06297459617838  
O 13.4265834902187 20.01922834557522 12.84511012360997  
O 12.71743792845436 15.94612864633575 7.32834636972976  
O 13.3791416949777 13.78294931787306 7.14601946099360  
O 10.22334298339528 13.52207250528249 19.5244224571334  
H 9.19624375204946 17.2389238640748 13.4224707926923  
H 11.0240285397260 15.0525675239126 8.76925080012786  
H 8.15674850941042 13.14952119267391 11.81672599230632  
H 8.96539420484820 11.01076759541449 15.29351559754995  
H 15.33203016673047 18.26630426142024 12.78518334994574  
H 13.17277605373947 18.7643429029560 15.17230165234495  
H 11.07806343176849 17.80161027408783 10.3125617559066  
H 13.87829424030933 10.15935564827937 18.61879359218547  
H 16.7731242266634 16.78946970343524 11.52201449507035  
H 12.52350178474939 7.55585487633933 13.68104065656306  
H 15.76613251080524 12.27916684699677 7.96197849158020  
H 16.66751155341681 10.49989095011623 9.48552206993162  
H 15.252591401977 14.140381308155322 18.0853809022066  
H 15.84588180240848 5.35178501456842 17.3841909796637  
H 18.26841719546685 12.77863819583854 13.08318980934854  
H 17.78391255761457 9.53572119110791 14.51007799736975  
H 5.13222478509142 9.76363138456109 13.62976232186557  
H 4.75152962956887 11.06412124967719 12.47549113618054  
H 4.49862741778255 11.3506583234725 14.2103766748223  
H 15.84588180240848 5.35178501456842 17.3841909796637  
H 17.16572541249301 11.28488159736316 22.06179351806167  
H 18.74611129858599 11.75757970692487 21.38068792729286  
H 21.30432426790233 12.34073209918205 8.38677487324906  
H 20.91758498132254 14.03832936648187 8.01273842920475  
H 20.32071074651468 12.75958270833183 6.93341401534977  
H 9.9251911109542 13.546718209402991 15.115714412  
H 7.19660508909454 16.73368563921099 9.35245632618563  
H 6.45536523400776 15.2479789963747 9.97647318663767  
H 8.17392965086445 20.8444215073201 16.28723430374311  
H 4.43995309975687 21.38198869374320 16.78324888528113  
H 9.5508811385469 20.24745320945931 17.823006128413  
H 20.14262129157379 17.6227244568908 14.784183384909679  
H 19.21515662932162 19.17181544218097 14.7557631300910  
H 19.2286003822732 18.10060208378763 13.33499644307608  
H 16.55878937711086 4.50404463669116 15.24602723375031  
H 15.62432263018304 4.66038815000847 16.77753470729219  
H 17.18387781540181 5.51150549552397 16.55962729974977  
H 12.98100453962465 9.39932913199962 4.9830549506913  
H 12.95229632173234 7.94616060552589 5.99189032163817  
H 14.52656081785618 8.59271582385991 5.42601707846649  
H 18.0782630922559 14.54160660478917 11.17362732885734  
H 17.11715511929988 8.84922814583046 12.02307205147797  
H 13.74045661335195 16.98583393792329 9.98541989504568  
H 10.69123687696490 15.32461500895959 17.4418736297679  
H 11.20711665791078 15.207161020292928 10.91271032920417  
H 13.69879426315375 16.2727903993208 18.9131512918712  
H 9.416975347221278 12.92646427419692 17.35891141952402  
H 18.09283939032951 10.93674526958211 11.49163780043919  
H 22.41413683252449 11.118115420550462 13.86052700802762  
H 22.24743786864229 11.09548843533018 15.64125051349335  
H 22.38255766180232 12.6516844224058 14.806302745242  
H 9.50634370116226 9.2694553306706 13.98348834765991  
H 8.88439737629918 6.78651359311905 9.47714171966827  
H 7.77768173940652 6.90435843389259 10.86326827977853  
H 9.05679742364526 5.66778464406883 10.88317143022723  
H 18.16067196868820 13.26839152249394 17.056299046694  
H 15.04430759091443 9.5721391767544 10.3083302745242  
H 9.53845571201815 8.82683660480111 20.4034933308900  
H 8.4256503201441 8.4109005494708 19.04703344061458  
H 8.39764822673730 10.03576761256654 19.7712327656309  
H 16.1479260001402 14.85088236827883 8.0616780311487  
H 16.5763515157992 19.55565279799882 7.11542985208875  
H 16.11843735042124 20.69872385447728 8.43084353709004  
H 14.88198203841266 8.0266316611067 7.3259455061112  
H 11.24580403517444 8.32061932164536 15.51389336930602

H 15. 73063363366635 20. 71650797646273 18. 74043019891224  
H 17. 33290224784420 19. 95389543142966 18. 84316223555797  
H 16. 14090185005703 19. 62989102041138 20. 12264690218768  
H 10. 63282730840651 11. 76754915645038 8. 62487649933484  
H 13. 49323786489859 22. 31119542324601 11. 80240278944945  
H 17. 19497860483379 22. 14052231427964 11. 74349568189556  
H 11. 67141153925418 21. 81729217169773 10. 277018649056746  
H 16. 04620462683474 9. 52066527283372 16. 84627896412467  
H 13. 57243176326786 14. 254618037053744 4. 66723140353114  
H 13. 25238254957095 16. 02258940075317 4. 82741494431269  
H 11. 90593238548759 14. 86636153101487 4. 55759037161188  
H 13. 81131815663932 8. 64281148243704 11. 77154706386482  
H 8. 15913013715594 13. 57452304471458 20. 05416567458683  
H 11. 44286397464677 12. 68896589093364 21. 27653431170746  
H 9. 51561226423620 13. 46187894776638 22. 56632219671094  
H 8. 84874341728123 14. 88050163963693 19. 04188360650144  
H 8. 21267289683962 15. 37087928646422 21. 70186693576008  
H 11. 86969592192560 14. 3651669419149 20. 79814155519113  
H 10. 62583427313981 14. 83609648391417 22. 84632179063390  
H 9. 66637618894947 16. 089046767210201 20. 96769398314409  
200  
./\_Model\_2COOH\_1264. 90134369. xyz  
R 15. 18755034551378 12. 69403848966367 15. 67620545414809  
Ru 15. 137573132333141 12. 67146820945306 11. 32972458299071  
Ru 15. 14547471380585 11. 11440181671144 13. 46257090195453  
Ru 13. 77648306832686 14. 98278854239015 15. 81433142066997  
Ru 13. 67922249389375 15. 00604367016514 11. 44383772090828  
Ru 12. 39736819835435 22. 55027885165354 15. 69099606403769  
Ru 13. 80854924961119 13. 44110815681957 13. 58934726410812  
Ru 12. 38501094971278 12. 67737649406264 11. 41325677875238  
Ru 12. 40497117565760 10. 9743425159262 13. 52630417543680  
Ru 12. 43166168128213 15. 73619487051319 13. 63468290125757  
Ru 11. 1126599597399 13. 28561623808986 13. 57024026385331  
Ru 8. 52912952529327 13. 41788931631913 13. 52367391056149  
Ru 9. 7249101733103 15. 48747085370793 13. 74263814827108  
Ru 9. 59061531484089 10. 93392092806991 13. 68294540487416  
Ru 10. 85975585246672 17. 73480576689779 13. 62469291920976  
Ru 10. 93760478199657 13. 27166530611318 9. 3772250393490  
Ru 9. 8216085119664 12. 44716278969341 11. 58396876221606  
Ru 9. 83752266995272 12. 51150896532552 15. 71573453169259  
Ru 11. 17751689653211 13. 23347680792110 17. 74074210731503  
Ru 12. 41096026057196 15. 82016157151256 9. 40696664943104  
Ru 11. 00176654783936 14. 89999585464303 11. 50042469663876  
Ru 11. 100320845049873 14. 82188904905110 15. 70847533078023  
Ru 12. 39547207890948 15. 56194890924505 17. 96840058292834  
Ru 12. 25191952418785 17. 30727543502701 11. 54052542446704  
Ru 13. 61969940141694 18. 11565693746238 13. 66449597539311  
Ru 12. 37078401737816 17. 17482943845967 15. 5426312329023  
Ru 11. 19420047406215 8. 691118380357166 13. 63699434917168  
Ru 12. 35154623208087 11. 23279555149490 9. 24366440983608  
Ru 11. 0911221710806024 18. 3111740417081914 11. 45034708182973  
Ru 11. 21828529434576 10. 19422831449300 15. 71245107405786  
Ru 12. 66006851543690 11. 02264530307063 17. 80552270253791  
Ru 13. 69278623739776 13. 51001181315421 9. 26409148656848  
Ru 13. 80236766501764 13. 36900764157672 17. 80067339381158  
Ru 15. 10219111550959 15. 70830216224871 9. 2402954718945  
Ru 15. 04113705424819 15. 73516462693570 13. 52909315019757  
Ru 15. 10579962663584 15. 71044776376928 17. 83771962415383  
Ru 15. 00003463083496 17. 2309502777164 11. 44753805903143  
Ru 15. 01664322677497 17. 25498856466940 15. 66557730719042  
Ru 13. 88166838095193 8. 80708480844027 13. 50726630529443  
Ru 13. 00994447165774 8. 02756832602895 15. 61245840291446  
Ru 15. 0411709040114 11. 1977595406251 9. 1721698382975  
Ru 13. 73036270498661 10. 32186433624138 11. 26752031342266  
Ru 13. 84990835988165 10. 33425208042428 15. 66660647180998  
Ru 15. 20709375221172 11. 15339230143330 17. 7595533703847  
Ru 16. 32325771314832 13. 46987198906707 9. 17905666610755  
Ru 16. 44401896616473 13. 47302012521482 13. 46223696176306  
Ru 16. 47687237610708 13. 44119442743241 17. 74245333080598  
Ru 16. 32904216119085 15. 0465896659682 11. 27389211001330  
Ru 16. 41767061715124 15. 04476074082220 15. 64655376603192  
Ru 16. 30189609909658 8. 81119001091990 13. 54706157619205  
Ru 16. 43239986905828 10. 36790880464642 11. 28142734729161  
Ru 17. 85004281107918 10. 96129451089414 13. 41109788287097  
Ru 16. 52116507091000 10. 49064008993437 15. 575706405274003  
Ru 17. 78226197627979 12. 8283637703670 8. 0146407690437  
Ru 17. 78978615166294 12. 65532194759528 15. 48193527031584  
C 5. 16419608380520 10. 75511044561422 13. 35452117624587  
C 6. 56181768158231 11. 29751767002274 13. 51730813499888  
C 17. 94308881856428 11. 18447981842675 21. 18985054930380  
C 17. 22949934815850 11. 58151582060935 19. 92514321874948  
C 20. 56601354758061 13. 1217727845112 8. 0146407690437  
C 19. 29787317034732 13. 01969558812683 8. 83961704943759  
C 7. 29441094579674 15. 71389865381599 9. 18064696062387  
C 8. 60806190953555 15. 11149486263313 9. 60757855763156  
C 9. 75498509175661 20. 47106699255907 16. 84054802922773  
C 10. 30078708384454 19. 33564618935168 16. 07889386246939  
C 19. 1856909097103 18. 1246246404667 14. 34758235133903  
C 17. 97260214465137 17. 40491056143712 14. 8743692659521  
C 16. 22497241200555 5. 04977532643919 15. 89726590397976  
C 15. 56781775385789 6. 31715423349975 15. 41027973383768  
C 13. 44654430323237 8. 96991621041986 5. 70018184947582  
C 13. 53667839816210 9. 77786007789366 6. 96759457404895  
C 21. 90993839930150 11. 6288145840993 14. 7476785499950  
C 20. 48987056269087 11. 69185987946601 14. 62285182338716  
C 8. 64968947426091 6. 72070950187053 10. 68114982388671

C 9. 61027135455299 7. 68985964457076 11. 31997620580999  
C 10. 76572141064436 16. 01990483895811 22. 09435951285440  
C 11. 39643943180006 15. 49056950301615 20. 84612609794179  
C 9. 11420211638740 9. 13194555793303 19. 506618128502136  
C 10. 13391483432614 9. 62018323006190 18. 50960012912886  
C 15. 83257410039582 19. 79917335768921 7. 91791027162937  
C 15. 6875170504717507 18. 62761604478290908  
C 16. 31936165316757 19. 7481764792377 19. 08076039656201  
C 15. 79442218390850 18. 57718997608302 18. 28543910762459  
C 12. 56595716332563 21. 70264189884408 11. 41053426062233  
C 12. 69024950169062 20. 257155803573737 11. 81350423222626  
C 13. 81338434825671 15. 04408447814369 5. 15771031464257  
C 13. 80232298552801 14. 9137625726968 6. 6567415655330  
D 6. 67656568338791 12. 52720225278459 13. 88307190842957  
D 7. 53144960780729 10. 51282876921146 13. 24914828292006  
D 17. 47363167515179 12. 73143385357049 19. 42881511280944  
D 16. 40202123198384 10. 74589974895614 19. 41633546514744  
D 18. 19867256314905 13. 35181493174235 8. 26496004823022  
D 19. 39424066803066 12. 6281685097462 10. 94609049056744  
D 9. 18172281419960 15. 61855368641674 10. 62980361689612  
D 9. 85285129949276 14. 11545277804953 8. 9363796714510  
D 11. 08779969267478 18. 49173857304193 16. 73146753969541  
D 10. 18952881969308 19. 28666971891001 14. 81088560570224  
D 10. 16053684634672 18. 07305126206819 15. 06147728799444  
D 18. 08256758474535 15. 14194900520279 15. 00223532379786  
D 14. 47443299204334 6. 67137250067295 15. 99503131549833  
D 16. 13800992937322 6. 93228607576982 14. 4546536180910  
D 14. 68115085933847 9. 95508550361331 7. 49470871247560  
D 12. 43094108119451 10. 22818229528727 7. 45177232151048  
D 19. 87080604769137 12. 50576813532040 15. 40134877643035  
D 19. 92479862678266 10. 92375128662920 13. 77960406160733  
D 10. 12759158760646 7. 35714848850322 12. 4425509740208  
D 9. 84086780912498 8. 79106628430722 10. 1739813488254  
D 11. 40585398785205 16. 14573344584962 19. 78172948042875  
D 11. 93542381928030 14. 28423755349900 20. 96180947372925  
D 9. 91958830608666 9. 43303173644163 17. 27421281340073  
D 11. 16484338771972 10. 23122416955034 18. 98593903031636  
D 15. 40411303702536 18. 3356901093915 10. 00154719138110  
D 10. 4883984801597 17. 42739462208868 8. 26181313091305  
D 15. 84784832565608 17. 42326789597891 18. 83701042639093  
D 15. 34778944491467 18. 80632225751235 17. 11404313320390  
D 12. 13446467348374 19. 37830509079800 11. 07538769761259  
D 13. 32578965882835 19. 99882071266836 12. 89652297970612  
D 12. 79522127125466 15. 9624356195010 7. 3466705457211  
D 13. 39742294529019 3. 78266738377970 7. 15109916187351  
H 9. 16112143729918 17. 1709200678339 13. 44788595755866  
H 11. 13549227710427 14. 93302730127964 8. 68161829330782  
H 8. 18298524375578 13. 1698509389625 11. 77488147257781  
H 8. 920809495270277 11. 02268857292323 15. 31616779664086  
H 15. 25065263770937 18. 25008515661779 12. 62819000802823  
H 13. 26357721543683 6. 09157255823279 15. 271883809000  
H 12. 49609463088854 9. 41524617939691 10. 45934642099992  
H 12. 300882467610283 14. 00692283572769 20. 05333500354357  
H 13. 9406789617903 10. 2218588231616 18. 7169231222938  
H 16. 74478346467105 16. 77197207605645 11. 59621751702421  
H 12. 5160965885750 7. 57052327740796 13. 39858967880925  
H 15. 919595798195223 13. 52909315019757 17. 903717219190  
H 16. 65748128264960 10. 49854023369530 9. 45670723391343  
H 15. 1760804055953 14. 08822366839917 18. 88940093011650  
H 16. 84139053451537 15. 38392457345390 17. 42451692843738  
H 18. 26122529528748 12. 7684775203955 13. 10086902094897  
H 17. 08944456080376 9. 49651489680587 14. 50057387354411  
H 5. 14203914309073 9. 6770786302741 13. 54715266314805  
H 4. 84421080973283 10. 92481596241768 12. 3150867246365  
H 4. 46886250426068 11. 28460401622441 14. 01494023257074  
H 18. 16217055657921 10. 11053332436964 21. 18047428829709  
H 17. 28367306713470 11. 38592623169542 22. 04723234000279  
H 18. 86176351461019 11. 76768002504507 21. 31213489877771  
H 21. 33282090955577 12. 4051349441505 8. 420500543806  
D 20. 9198775319753 14. 15953879308121 8. 05485609180163  
D 20. 34791674220810 12. 87782149385053 6. 96668717215566  
D 7. 04585275429673 15. 41819396284622 8. 15619531718704  
D 7. 33668211549876 16. 80858535953788 9. 27127257103118  
D 6. 50610403856154 15. 352979622834 9. 85797419965732  
D 8. 8269794593496 20. 80091343289153 16. 34772632308211  
D 13. 2633789642864 21. 3114918127917 16. 0624080265730  
D 9. 5541722970793 20. 1688392911113 17. 87416196441593  
D 20. 10355909930545 17. 60730026025633 14. 72143158638898  
D 19. 14867364655805 19. 18623428692166 14. 61401844784515  
D 19. 18301556818055 18. 04249771921827 13. 24994740509622  
D 16. 3516635112851 4. 3589210564462 15. 05243420808225  
D 15. 62905478759086 4. 5727353522732 16. 603516483493  
D 17. 22869066974787 5. 28373430880809 16. 2784298554918  
D 12. 84722361270052 9. 51267598988854 4. 95755474890087  
D 12. 92679848673638 8. 02449154208260 5. 91190192249011  
D 14. 4445370210043 8. 75727378373648 5. 30488537275096  
D 18. 07657109908100 14. 53960477258900 11. 27390606789141  
D 17. 19032094590006 6. 87878489576087 12. 040900703341  
D 13. 6452956284370 14. 04025181823679 10. 0384802993841  
D 10. 67388925367081 15. 15661498339308 17. 46661120110596  
D 11. 33915607168821 17. 14494126048710 10. 02206444862478  
D 13. 7321742605156 16. 25635089654596 18. 84036208405241  
D 9. 409092106786991 12. 68256133902292 17. 46968247234461  
D 18. 13475029170179 10. 9529217018779 11. 404154545224  
D 4. 8386681787784 11. 17623267437523 13. 8553702830722  
D 22. 2464642846264 11. 01376682248262 15. 62303141331945





H 18.03751959119145 14.61876029792260 11.28560157373554  
H 17.64140091906733 9.29811778623533 12.38234382143810  
H 13.53390559156213 17.08625352875497 10.02112613637771  
H 10.68588519878162 15.57893317132469 17.24989691299793  
H 11.32997379254825 17.12401923216073 9.8998087599323  
H 13.709959976908172 16.24456097155093 18.8938082527527  
H 8.66276117081439 13.55619092509315 16.21382330488051  
H 18.14853815725369 11.09958913012292 11.44121079696527  
H 22.41221360298718 10.94831304631299 14.05076607481991  
H 22.11036841840228 10.69172118218576 15.78828082066387  
H 22.41872698061361 12.33799725028335 15.20214799976650  
H 9.70212421698713 9.24373894617511 14.49391769759328  
H 8.41901891780053 6.92842290272033 9.75151089314028  
H 7.50335806914814 6.98750541109313 11.28032661301437  
H 8.74437985486464 5.73688268538795 11.06597865849644  
H 18.15607348105874 13.31745875756635 17.06492161681826  
H 8.79616653080559 15.06631003856305 21.4241732883178  
H 10.23128823282894 15.96572825080919 22.0188999056165  
H 10.10420643403583 14.18579503908138 22.22552905164310  
H 15.25835778680655 9.39856705703598 10.57098140418390  
H 9.82297962973220 8.63344081178630 20.51295029768440  
H 8.81400377633975 7.96436123606350 19.17659471098925  
H 8.46413376936281 9.57211299166080 19.84835645846692  
H 16.15917401211200 14.81346404874401 8.89918739691651  
H 16.50570610413346 19.59248026636373 7.14355455918089  
H 16.06562044250803 20.65384234838919 8.45845649973736  
H 14.81800400461506 19.99701019894843 7.35964105721100  
H 11.26860035287345 8.24935415188750 15.63553950539172  
H 15.98589553054161 20.63213227040301 18.75347759947392  
H 17.51742497938499 19.74616686218946 18.93143060140057  
H 16.25401206423990 19.54083633350491 20.16596903603563  
H 10.11189297869995 11.7784578192576 9.80078659744025  
H 13.14614572003411 22.30550482134558 12.00689677145748  
H 11.42964738307940 22.01116367677002 11.60028044701988  
H 12.66656536668238 21.77804158485832 10.35321416285199  
H 16.20200963340055 9.72676589651397 17.03477293368551  
H 13.63739735992125 14.20040818570805 4.69188482122949  
H 13.37877662396832 15.978730849409958 4.04171750194541  
H 11.99073099551498 14.87293264744798 4.83683353056321  
H 13.89049687339343 8.56153687807117 11.78150177762515  
S  
./\_Model\_Free-CH3COOH--46.73013402.xyz  
C 11.78651873507641 11.99999998909077 11.45440586523039  
C 11.8555186365367876 11.99999998909077 12.95729814969187  
O 13.83602350527017 12.00802441523257 10.89294780381789  
O 10.77135215052428 11.99999155870293 10.77968250767098  
H 12.89613571666792 11.99999664258211 9.92333187651322  
H 10.84388609819671 12.0000090866530 13.37171237665253  
H 12.40527959578417 11.11681891443837 13.309809165222735  
H 12.40528556193241 12.88316994458534 13.30981225520084  
Z  
./\_Model\_Free-H2--6.77123711.xyz  
H 10.00000005074525 10.00000027296230 10.04986321538614  
H 9.99999994925493 9.99999972703787 10.80013678461385  
13  
./\_Model\_Free-THF--71.97975577.xyz  
C 12.97477466290835 11.272970885491359 11.4125720801792  
C 12.89212511097767 12.3278112666025 12.51570700868503  
C 11.48475034097510 12.89718024469459 12.28615370656702  
C 10.69764372369229 11.64517975165955 11.89092075052311  
O 11.63853659304489 10.75407936508383 11.2523048345085  
H 13.31144394277926 11.72017824788133 10.45789691800731  
H 9.87095315362622 11.05571431654932 11.185381804905647  
H 11.49767406664490 13.61688422963154 11.4538061222352  
H 13.64198442125421 10.43184889124600 11.65277348304237  
H 13.68449416676502 13.08475857052795 12.44330890431263  
H 10.27058217639441 11.13670535856841 12.77454946144861  
H 11.06792988205338 13.40225505392747 13.16757240765906  
H 12.95900276364197 11.85443388865613 13.50705231631544  
55  
./\_Model\_Ru55\_akal--424.372067.xyz  
Ru 11.01770 9.51963 8.72138  
Ru 12.34325 11.71065 8.76278  
Ru 12.24774 7.13183 8.79675  
Ru 13.55034 13.91802 8.77401  
Ru 13.54119 9.40618 4.63987  
Ru 12.27542 8.65418 6.70429  
Ru 13.56662 9.44930 8.77221  
Ru 12.22146 8.72221 10.79338  
Ru 13.54201 9.44255 12.89627  
Ru 14.87579 11.70853 4.60925  
Ru 13.56202 10.94753 6.65938  
Ru 14.94223 11.76648 8.77896  
Ru 13.56268 10.96542 10.86368  
Ru 14.85373 11.70229 12.90676  
Ru 14.86026 13.20408 6.70118  
Ru 16.19521 14.03181 8.73057  
Ru 14.86082 13.23069 10.83596  
Ru 13.58380 4.92048 8.80220  
Ru 14.87478 7.14142 4.64398  
Ru 13.58162 6.38907 6.69908  
Ru 14.87122 7.11350 8.77514  
Ru 13.59124 6.39924 10.82691  
Ru 14.89779 7.12905 12.94770  
Ru 15.15932 9.42862 4.54817  
Ru 14.89919 8.69425 6.63932

Ru 16.26862 9.45669 8.79118  
Ru 14.88045 8.64786 10.94473  
Ru 16.13626 9.39954 13.00175  
Ru 17.44308 11.64713 4.48768  
Ru 16.25016 10.96662 6.58901  
Ru 17.61947 11.86061 8.79133  
Ru 16.27192 10.98409 10.95292  
Ru 17.46316 11.63870 13.05366  
Ru 17.46567 13.18969 6.66352  
Ru 17.41572 13.22355 10.92274  
Ru 16.34582 4.91105 8.87181  
Ru 14.94896 4.21480 10.77134  
Ru 17.42771 7.13423 4.60187  
Ru 16.24538 6.37566 6.69616  
Ru 17.63390 7.17587 8.80078  
Ru 16.23003 6.35222 10.92350  
Ru 17.54355 7.18438 12.91690  
Ru 18.75908 9.46253 4.53054  
Ru 17.56342 8.66450 6.57017  
Ru 19.01388 9.49218 8.77825  
Ru 17.60669 8.76930 10.95891  
Ru 18.72031 9.47479 13.07190  
Ru 18.80325 10.92580 6.64406  
Ru 18.81801 11.00788 10.90708  
Ru 18.70135 4.90846 8.79353  
Ru 18.83080 8.39158 6.78839  
Ru 20.19566 7.17824 8.75514  
Ru 18.86569 6.42386 10.86316  
Ru 20.10256 8.65380 6.66186  
Ru 20.09350 8.65307 10.92158  
183  
./Thermo-and-HER\_CH3COOH\_16-Domain1.xyz  
Ru 15.01738 12.74650 15.84440  
Ru 15.24270 12.68150 11.47900  
Ru 15.21800 11.18520 13.66870  
Ru 13.57930 14.92750 15.75290  
Ru 13.70900 14.92480 11.44390  
Ru 12.35500 12.40650 15.69070  
Ru 13.80600 13.40530 13.58660  
Ru 12.50300 12.54100 11.38750  
Ru 12.46480 10.94030 13.55670  
Ru 12.31100 15.65250 13.54290  
Ru 11.15150 13.22630 13.46410  
Ru 8.50930 13.07020 13.39490  
Ru 9.63900 15.29900 13.52570  
Ru 9.80700 10.73000 13.50830  
Ru 10.67100 17.61150 13.46640  
Ru 11.12600 13.09120 9.28690  
Ru 9.88450 12.31630 11.48760  
Ru 9.73680 12.35350 15.47440  
Ru 10.82530 13.15450 17.63870  
Ru 12.52030 15.72480 9.35900  
Ru 11.00300 14.71750 11.34850  
Ru 10.90300 14.68480 15.58410  
Ru 12.02100 15.55830 17.82170  
Ru 12.18700 17.18550 11.50160  
Ru 13.49300 18.00900 13.62820  
Ru 12.02800 17.09580 15.63330  
Ru 11.41650 8.59470 13.57980  
Ru 12.71050 11.03720 9.32670  
Ru 11.29700 10.15380 11.42650  
Ru 11.21680 10.06930 15.65040  
Ru 12.42680 10.95930 17.75150  
Ru 13.85230 13.42780 9.31550  
Ru 13.52400 13.39880 17.87550  
Ru 15.21380 15.60500 9.41590  
Ru 14.99250 15.81730 13.61020  
Ru 14.63950 15.74530 17.90230  
Ru 14.83430 17.29050 11.47300  
Ru 14.50700 17.30730 15.68740  
Ru 14.08380 8.89080 13.54890  
Ru 13.04000 7.90880 15.48220  
Ru 15.24130 11.07130 9.45230  
Ru 13.94300 10.30450 11.44880  
Ru 13.80850 10.25930 15.72530  
Ru 14.92600 11.16500 17.84460  
Ru 16.44130 13.54230 9.40580  
Ru 16.48300 13.48450 13.72720  
Ru 16.09000 13.68200 17.91530  
Ru 16.37550 14.97300 11.52400  
Ru 16.20950 15.06130 15.92550  
C 5.42630 10.81090 13.95630  
Ru 16.57500 10.40880 11.70390  
Ru 17.87250 11.21630 13.78730  
Ru 16.46580 10.54770 15.81450  
Ru 17.77050 12.82000 11.62280  
Ru 17.63330 12.75070 15.97260  
C 5.42630 10.81090 13.95630  
C 6.75500 10.72820 13.50470  
C 14.19050 12.00580 22.07480  
C 14.24100 12.13930 20.57410  
C 20.40000 12.69830 8.10520  
C 19.25900 12.78230 8.98120  
C 8.38350 15.31300 8.79940  
C 6.68180 14.77300 9.34310  
C 9.67820 20.68050 16.41430

|   |          |          |          |
|---|----------|----------|----------|
| C | 10.22350 | 19.45600 | 15.75600 |
| C | 19.17650 | 17.66630 | 14.15280 |
| C | 17.88720 | 16.94630 | 14.45000 |
| C | 16.30370 | 4.92780  | 15.78670 |
| C | 15.70800 | 6.24520  | 15.36000 |
| C | 14.17530 | 9.50940  | 5.50940  |
| C | 14.07800 | 10.67370 | 6.69990  |
| C | 21.88830 | 11.89880 | 15.39280 |
| C | 20.39900 | 11.93650 | 15.18220 |
| C | 9.01120  | 6.44070  | 10.66260 |
| C | 9.85030  | 7.51180  | 11.30820 |
| C | 9.07830  | 8.70980  | 19.31750 |
| C | 10.03030 | 9.36530  | 18.35860 |
| C | 10.02550 | 14.73500 | 21.63690 |
| C | 10.51780 | 14.58870 | 20.22020 |
| C | 17.40300 | 19.25750 | 8.50720  |
| C | 16.52480 | 18.22800 | 9.16920  |
| C | 16.88400 | 19.43950 | 18.68570 |
| C | 16.00700 | 18.36000 | 18.00010 |
| C | 12.11350 | 21.64750 | 11.59900 |
| C | 12.35780 | 20.21320 | 11.90510 |
| C | 13.38450 | 14.88150 | 5.15890  |
| C | 13.40250 | 14.78650 | 6.66250  |
| D | 6.72230  | 12.01650 | 13.48020 |
| D | 7.01630  | 10.01670 | 13.40930 |
| D | 13.52550 | 13.04780 | 20.02730 |
| D | 14.98880 | 11.30100 | 19.94120 |
| D | 10.14850 | 13.09030 | 8.39440  |
| D | 19.37300 | 12.56380 | 10.22580 |
| D | 9.16230  | 15.32750 | 10.38620 |
| D | 9.21120  | 13.77980 | 8.74928  |
| D | 10.97050 | 18.58130 | 16.46140 |
| D | 9.92730  | 19.23700 | 14.53060 |
| D | 16.92880 | 17.04770 | 13.62450 |
| D | 17.84130 | 16.23630 | 15.52380 |
| D | 14.53270 | 6.52900  | 15.78120 |
| D | 16.43530 | 6.97980  | 14.60116 |
| D | 15.17230 | 10.29770 | 7.53060  |
| D | 12.91530 | 10.26430 | 7.40170  |
| D | 19.70550 | 12.63600 | 16.00200 |
| D | 19.90200 | 11.26100 | 14.21630 |
| D | 10.33980 | 7.25180  | 12.47270 |
| D | 10.02170 | 8.60880  | 10.69430 |
| D | 9.80180  | 9.30300  | 17.11350 |
| D | 11.05850 | 9.05430  | 18.87730 |
| D | 10.22530 | 13.05000 | 19.60530 |
| D | 11.16950 | 15.57080 | 19.71480 |
| D | 16.18300 | 18.45030 | 10.38360 |
| D | 16.18930 | 17.19430 | 8.48980  |
| D | 15.84850 | 17.29400 | 18.65400 |
| D | 15.68300 | 16.58650 | 16.79060 |
| D | 11.97630 | 19.30450 | 11.09450 |
| D | 12.92450 | 19.99800 | 13.03560 |
| D | 13.06700 | 15.84100 | 7.31510  |
| D | 13.73380 | 13.67150 | 7.19130  |
| H | 5.56400  | 8.93630  | 13.62170 |
| H | 4.05500  | 10.26050 | 12.63960 |
| H | 4.84250  | 10.38400 | 14.40320 |
| H | 15.14930 | 11.63750 | 22.45750 |
| H | 13.41730 | 11.26650 | 22.33430 |
| H | 13.92550 | 12.96150 | 22.53890 |
| H | 21.31050 | 12.22980 | 8.64370  |
| H | 20.77400 | 13.71450 | 7.80290  |
| H | 20.25000 | 12.13780 | 7.19080  |
| H | 7.19100  | 14.92450 | 7.79430  |
| H | 7.41330  | 16.40950 | 8.79090  |
| H | 6.56300  | 15.00980 | 9.46630  |
| H | 8.76730  | 21.02530 | 15.90910 |
| H | 10.43320 | 21.40580 | 16.34130 |
| H | 9.48880  | 20.50230 | 17.47770 |
| H | 19.76150 | 17.81550 | 15.06700 |
| H | 18.97000 | 18.62330 | 13.65940 |
| H | 19.76430 | 17.04630 | 13.45810 |
| H | 16.72700 | 4.41480  | 14.91360 |
| H | 15.55230 | 4.29830  | 16.27200 |
| H | 17.13000 | 5.11450  | 16.48740 |
| H | 13.22550 | 9.62100  | 4.97690  |
| H | 14.41150 | 8.43350  | 5.58170  |
| H | 14.99180 | 9.98780  | 4.95900  |
| H | 10.13230 | 14.58480 | 11.63660 |
| H | 16.22680 | 9.66970  | 10.13010 |
| H | 13.70730 | 17.01300 | 9.85060  |
| H | 10.31150 | 14.94830 | 17.31830 |
| H | 11.29680 | 16.93950 | 9.99490  |
| H | 13.25350 | 16.60430 | 18.62070 |
| H | 9.32400  | 12.27950 | 17.24610 |
| H | 10.31250 | 10.93170 | 12.02030 |
| H | 22.39180 | 11.48450 | 14.50980 |
| H | 22.10680 | 11.24780 | 16.25830 |
| H | 22.26500 | 12.89430 | 15.62550 |
| H | 17.82650 | 13.22030 | 17.70520 |
| H | 8.92820  | 6.61530  | 9.58460  |
| H | 8.00380  | 6.46550  | 11.10410 |
| H | 9.43830  | 5.45130  | 10.06300 |
| H | 9.01680  | 17.00450 | 13.28390 |
| H | 8.89480  | 9.35950  | 20.18200 |

|   |          |          |          |
|---|----------|----------|----------|
| H | 9.53720  | 7.77280  | 19.69010 |
| H | 8.13850  | 8.45450  | 18.81360 |
| H | 11.30970 | 14.74230 | 8.59380  |
| H | 10.54820 | 15.55100 | 22.14600 |
| H | 10.16130 | 13.79080 | 22.17830 |
| H | 8.94780  | 14.95600 | 21.62060 |
| H | 14.90650 | 18.51970 | 12.71060 |
| H | 17.53500 | 19.03150 | 7.44430  |
| H | 18.38400 | 19.26000 | 9.00510  |
| H | 16.97050 | 20.25850 | 8.63560  |
| H | 11.31630 | 8.14430  | 15.44630 |
| H | 17.08080 | 20.27450 | 18.00660 |
| H | 17.82900 | 19.01930 | 19.05490 |
| H | 16.32380 | 19.79900 | 19.56010 |
| H | 10.53480 | 11.46800 | 9.76460  |
| H | 12.56830 | 22.33380 | 12.23040 |
| H | 11.03080 | 21.82830 | 11.46050 |
| H | 12.52030 | 21.82650 | 10.50630 |
| H | 16.22580 | 9.04230  | 17.40340 |
| H | 13.92580 | 14.04230 | 4.71070  |
| H | 13.81800 | 15.83650 | 4.83890  |
| H | 12.33950 | 14.86050 | 4.81600  |
| H | 12.60720 | 9.36200  | 10.45720 |

116

./Thermo-and-HER\_CH3COOH-H\_1\_2-Domain4.xyz

|    |          |          |          |
|----|----------|----------|----------|
| Ru | 15.25553 | 13.23005 | 15.29992 |
| Ru | 15.27287 | 13.47170 | 10.90189 |
| Ru | 15.32763 | 11.83864 | 13.02533 |
| Ru | 13.74322 | 15.52744 | 15.45353 |
| Ru | 13.70818 | 15.85144 | 11.02650 |
| Ru | 12.48075 | 13.15444 | 15.30143 |
| Ru | 13.91771 | 14.14965 | 13.14282 |
| Ru | 12.50866 | 13.45724 | 10.90442 |
| Ru | 12.66197 | 11.80284 | 12.96676 |
| Ru | 12.41812 | 16.42222 | 13.30978 |
| Ru | 11.24458 | 14.03441 | 13.13171 |
| Ru | 8.49293  | 13.95873 | 13.03401 |
| Ru | 9.70901  | 16.18117 | 13.31891 |
| Ru | 9.75721  | 11.52486 | 12.99312 |
| Ru | 10.91898 | 18.45629 | 13.41055 |
| Ru | 11.10749 | 14.21943 | 8.94692  |
| Ru | 9.92786  | 13.17540 | 11.06818 |
| Ru | 9.89993  | 13.00552 | 15.05253 |
| Ru | 11.12622 | 13.64078 | 17.34120 |
| Ru | 12.32306 | 16.60741 | 9.95379  |
| Ru | 11.05319 | 15.65902 | 11.16948 |
| Ru | 11.09251 | 15.37607 | 15.34771 |
| Ru | 12.37456 | 16.04022 | 17.52508 |
| Ru | 12.30971 | 18.03090 | 11.23519 |
| Ru | 13.52390 | 18.07011 | 13.45062 |
| Ru | 12.35940 | 17.74097 | 15.54110 |
| Ru | 11.30174 | 9.30375  | 12.88662 |
| Ru | 12.56929 | 12.01211 | 8.81703  |
| Ru | 11.27131 | 11.07206 | 10.92550 |
| Ru | 11.31672 | 10.83291 | 14.90075 |
| Ru | 12.49674 | 11.38706 | 17.22893 |
| Ru | 13.75041 | 14.34524 | 8.82222  |
| Ru | 13.79170 | 13.73620 | 17.48171 |
| Ru | 14.95441 | 16.74774 | 9.02779  |
| Ru | 15.07557 | 16.56835 | 13.30377 |
| Ru | 14.98073 | 16.15997 | 17.57425 |
| Ru | 14.85144 | 18.10990 | 11.29160 |
| Ru | 14.86943 | 17.83641 | 15.51374 |
| Ru | 14.04801 | 9.45127  | 12.99504 |
| Ru | 12.55298 | 8.70731  | 15.16983 |
| Ru | 15.16196 | 12.18924 | 8.75597  |
| Ru | 14.01639 | 11.09526 | 10.86637 |
| Ru | 13.93156 | 10.89742 | 15.07888 |
| Ru | 15.20253 | 11.50437 | 17.19141 |
| Ru | 16.38522 | 14.51933 | 8.88231  |
| Ru | 16.55791 | 14.35048 | 13.16839 |
| Ru | 16.45767 | 13.93554 | 17.39301 |
| Ru | 16.38806 | 15.96574 | 11.16879 |
| Ru | 16.37200 | 15.66812 | 15.34297 |
| Ru | 16.54524 | 9.64382  | 12.82671 |
| Ru | 16.65329 | 11.32060 | 10.75392 |
| Ru | 18.01269 | 11.91179 | 12.93151 |
| Ru | 16.65629 | 11.04894 | 15.05748 |
| Ru | 17.79960 | 13.76291 | 10.99731 |
| Ru | 17.77547 | 13.39777 | 15.16882 |
| C  | 12.38868 | 7.44750  | 19.33963 |
| C  | 12.44858 | 8.42450  | 18.19572 |
| O  | 12.36245 | 7.91450  | 17.00985 |
| O  | 12.58096 | 9.65799  | 18.45285 |
| H  | 6.88617  | 13.94333 | 13.10674 |
| H  | 10.51151 | 8.01060  | 13.46342 |
| H  | 8.00858  | 15.58721 | 13.49609 |
| H  | 9.59696  | 17.70511 | 14.35706 |
| H  | 8.30813  | 12.45526 | 12.07000 |
| H  | 9.48552  | 13.24754 | 16.79693 |
| H  | 10.57135 | 15.98066 | 9.35178  |
| H  | 9.65044  | 17.73158 | 12.34891 |
| H  | 9.46163  | 13.67014 | 9.42075  |
| H  | 10.59736 | 15.42302 | 17.16738 |
| H  | 11.79019 | 18.22408 | 9.50463  |
| H  | 12.02425 | 19.50813 | 12.37493 |

H 11.74496 17.67882 17.23425  
H 11.18970 12.74537 7.92784  
H 10.51271 9.48133 11.26258  
H 11.49333 10.58497 9.23673  
H 9.65969 9.68478 13.26327  
H 11.90799 10.70201 16.70988  
H 12.95773 15.09859 7.83936  
H 12.40948 14.37706 18.53288  
H 13.62304 17.48708 8.12952  
H 13.67734 16.86243 18.51601  
H 14.82745 19.50191 12.43878  
H 15.25100 18.39523 9.53336  
H 16.65439 17.64783 11.61537  
H 14.76700 19.40388 14.61207  
H 13.94931 10.77842 8.96725  
H 12.81725 9.63519 11.70277  
H 14.16373 9.12992 15.48137  
H 13.88024 12.09919 18.34638  
H 15.11219 15.27891 7.81223  
H 16.59729 12.35917 18.20869  
H 18.09636 15.53238 11.35803  
H 15.39093 17.85317 17.23541  
H 15.44155 8.31709 13.16133  
H 16.61596 11.12278 8.98323  
H 15.47758 9.94588 10.88963  
H 18.23721 10.22641 12.42986  
H 16.46973 10.34834 16.69353  
H 17.27498 9.36640 14.33292  
H 18.07944 14.11504 9.26140  
H 18.39428 12.01680 11.09492  
H 18.46050 13.58848 13.36292  
H 18.46095 11.61151 14.62500  
H 8.10628 12.98862 14.36184  
H 11.94005 19.34283 14.62194  
H 11.12595 12.14519 18.23348  
H 15.13220 14.56143 18.56043  
H 12.72687 8.17915 13.42216  
H 16.41908 13.12035 7.81309  
H 16.77030 16.33161 9.39590  
H 16.81203 15.78352 17.15340  
H 18.14661 13.69141 16.90292  
H 12.57130 7.95281 20.29254  
H 13.12775 6.65981 19.18117  
H 11.39734 6.97210 19.35623  
H 16.61722 17.38545 14.97345

152

./Thermo\_CH3COOH\_10-H\_0\_4.xyz

Ru 15.10700 13.54560 15.81830  
Ru 15.17560 13.44090 11.48590  
Ru 15.19070 11.97180 13.68476  
Ru 13.61070 15.67670 15.08690  
Ru 13.55450 15.73720 11.44610  
Ru 12.28960 13.36390 15.77660  
Ru 13.76380 14.20150 13.65560  
Ru 12.39440 13.32500 11.55140  
Ru 12.40380 11.74500 13.67040  
Ru 12.27640 16.47350 13.63380  
Ru 11.03730 14.04920 13.59340  
Ru 8.39840 14.12960 13.50410  
Ru 9.54990 16.21780 13.65250  
Ru 9.44270 11.66620 13.63430  
Ru 10.71120 18.48850 13.63180  
Ru 11.02630 13.91260 9.45950  
Ru 9.79780 13.14710 11.59760  
Ru 9.65660 13.31750 15.63630  
Ru 10.99740 13.96760 17.83120  
Ru 12.36220 16.40300 9.36540  
Ru 10.89400 15.55690 11.50240  
Ru 10.99670 15.59090 15.67940  
Ru 12.21130 16.28340 17.88860  
Ru 12.14410 17.90510 11.58090  
Ru 13.37340 18.80630 13.68360  
Ru 12.13330 17.92310 15.79280  
Ru 11.24040 9.41870 13.76870  
Ru 12.48910 11.78630 9.44590  
Ru 11.13640 10.97960 11.62170  
Ru 10.88940 11.02300 15.64890  
Ru 12.30340 11.62730 17.70970  
Ru 13.64820 14.05130 9.42560  
Ru 13.61800 14.05080 17.94270  
Ru 14.90540 16.29040 9.37890  
Ru 14.91210 16.67250 13.71190  
Ru 14.74310 16.43220 17.98270  
Ru 14.74930 17.99440 11.56930  
Ru 14.55460 18.04550 15.98210  
Ru 13.93360 9.60170 13.79310  
Ru 12.56690 9.34360 16.23800  
Ru 15.05030 11.91560 9.37660  
Ru 13.85560 11.07270 11.56430  
Ru 13.96900 11.13990 15.76620  
Ru 15.02440 11.95830 17.92060  
Ru 16.26530 14.31490 9.36990  
Ru 16.42520 14.31840 13.67690  
Ru 16.27700 14.27950 17.90490  
Ru 16.24430 15.81770 11.57350  
Ru 16.23400 15.91350 15.83650

Ru 16.40390 9.72410 13.74860  
Ru 16.48270 11.16450 11.54690  
Ru 17.79950 11.94450 13.62650  
Ru 16.49570 11.34190 15.77270  
Ru 17.73040 13.70890 11.57040  
Ru 17.75010 13.59400 15.79650  
C 5.08010 11.37050 14.04840  
C 6.44870 11.97210 13.87010  
C 13.73900 12.41490 22.04800  
C 13.97630 12.64110 20.57920  
C 20.49110 14.53190 8.27690  
C 19.23620 14.20070 9.04010  
C 7.52170 16.40140 8.75560  
C 8.79310 15.83930 9.33020  
C 9.71950 21.40340 16.74340  
C 10.29780 20.22000 16.01940  
C 18.80520 18.97480 14.05150  
C 17.67260 18.01740 14.30550  
C 15.50530 6.04030 15.93510  
C 14.65940 7.21310 15.49580  
C 13.69170 9.49510 5.96960  
C 13.70390 10.31510 7.22990  
C 21.63730 11.53870 15.70440  
C 20.26950 12.00040 15.30480  
C 8.74450 7.34370 10.86570  
C 9.63600 8.37410 11.50800  
O 6.53910 13.24860 13.85970  
O 7.43390 11.15880 13.72140  
O 13.65420 13.76760 20.07960  
O 14.47710 11.66160 19.90350  
O 18.11670 14.48580 8.47590  
O 19.34520 13.68230 10.19820  
O 9.22270 16.33500 10.42440  
O 9.37280 14.88650 8.69370  
O 11.02570 19.40600 16.69950  
O 10.06130 20.09390 14.77140  
O 16.76510 17.90020 13.41560  
O 17.66120 17.37990 15.42040  
O 13.62340 7.49250 16.18260  
O 15.02770 7.86160 14.43740  
O 14.82650 10.54510 7.78820  
O 12.57580 10.74380 7.68210  
O 19.69600 12.87790 16.05100  
O 19.73000 11.47450 14.26660  
O 10.15580 8.07250 12.64310  
O 9.82960 9.47840 10.90320  
H 8.98670 17.92130 13.53040  
H 12.35490 14.86570 8.33200  
H 8.17830 13.78400 11.63740  
H 9.45950 11.75550 16.43660  
H 10.40110 12.03120 12.03120  
H 14.55300 19.50260 14.93020  
H 12.40060 10.17360 10.66350  
H 11.10730 12.50020 18.82270  
H 12.17240 9.81940 17.94690  
H 16.02290 17.53600 10.41570  
H 12.59000 8.32900 13.45790  
H 15.95320 13.00400 8.21300  
H 16.66120 11.13180 9.77280  
H 16.54260 12.64570 18.62060  
H 16.62610 16.08040 17.69940  
H 18.24770 13.73650 14.01120  
H 17.20930 9.65870 15.28520  
H 5.15270 10.34880 14.43570  
H 4.57650 11.33890 13.07040  
H 4.47690 11.99800 14.71510  
H 14.43660 11.66860 22.44340  
H 12.71400 12.03710 22.18270  
H 13.82590 13.35960 22.59570  
H 21.33240 13.93580 8.64390  
H 20.72200 15.59680 8.43420  
H 20.34150 14.37780 7.20160  
H 7.40020 16.09660 7.71120  
H 7.52110 17.49470 8.84380  
H 6.67220 16.02050 9.34190  
H 8.08760 21.83520 16.17810  
H 10.50600 22.16540 16.85430  
H 9.39740 21.11160 17.74950  
H 19.62870 18.79820 14.75070  
H 18.43700 20.00320 14.18340  
H 19.15080 18.07810 13.01470  
H 16.36200 5.90760 15.26870  
H 14.89190 5.13860 15.95550  
H 15.85470 6.22760 16.96160  
H 12.66650 9.32850 5.62520  
H 14.19120 8.53360 6.19050  
H 14.26460 10.01860 5.19150  
H 17.99470 15.45240 11.52090  
H 15.33360 9.90200 11.26720  
H 13.62660 17.14580 8.34850  
H 10.43820 15.72530 17.52910  
H 11.71720 17.98610 9.79360  
H 13.45490 17.23790 18.87450  
H 9.26690 13.73660 17.32280  
H 18.19040 11.86730 11.77200  
H 22.13060 11.02900 14.87050

H 21.54410 10.83540 16.54580  
H 22.23720 12.38900 16.05040  
H 9.69110 10.01650 14.52220  
H 8.47940 7.64400 9.84760  
H 7.82970 7.23280 11.46520  
H 9.24990 6.36930 10.85560  
H 17.99120 14.06940 17.50480

170

./Thermo\_CH3COOH\_10-H\_0.8.xyz

Ru 14.99990 13.27540 15.79620  
Ru 15.14030 13.17680 11.45790  
Ru 15.04520 11.71910 13.63240  
Ru 13.67950 15.63250 15.78560  
Ru 13.72190 15.58710 11.39070  
Ru 12.24260 13.32690 15.76120  
Ru 13.72030 14.07130 13.62420  
Ru 12.30170 13.31420 11.45820  
Ru 12.20320 11.73880 13.54670  
Ru 12.40020 15.45600 13.62940  
Ru 10.97090 14.11290 13.59040  
Ru 8.33380 14.14560 13.50410  
Ru 9.57770 16.37470 13.60970  
Ru 9.51160 11.77340 13.61220  
Ru 11.04270 18.55310 13.40890  
Ru 11.00440 14.63240 9.28930  
Ru 9.74350 13.27080 11.53070  
Ru 9.62930 13.39630 15.69340  
Ru 10.97680 14.10320 17.80070  
Ru 12.63110 16.33580 9.25990  
Ru 10.97420 15.73260 11.53770  
Ru 10.92800 15.73800 15.63600  
Ru 12.36200 15.36340 17.81860  
Ru 12.60870 17.87750 11.40220  
Ru 13.71060 18.76010 13.59200  
Ru 12.23320 18.10320 15.73570  
Ru 10.95440 9.46860 13.66880  
Ru 12.26530 11.78930 9.24530  
Ru 10.90800 11.03710 11.45450  
Ru 10.87750 11.02250 15.70720  
Ru 12.26040 11.74360 17.82090  
Ru 13.69660 13.90180 9.38590  
Ru 13.62420 14.01490 17.99810  
Ru 15.19130 16.11600 9.39400  
Ru 15.14460 16.34690 13.06150  
Ru 14.96150 16.27160 17.89340  
Ru 15.10430 17.75010 11.48700  
Ru 15.08060 17.87430 15.83460  
Ru 13.59210 9.53070 13.67440  
Ru 12.51450 8.83680 15.88750  
Ru 14.91560 11.72500 9.29070  
Ru 13.64420 10.96470 11.51420  
Ru 13.53130 11.03920 15.69200  
Ru 14.82730 11.73150 17.85980  
Ru 16.39170 13.83700 9.36490  
Ru 16.36520 13.97550 13.71330  
Ru 16.22400 14.00630 17.93790  
Ru 16.42220 15.45100 11.60010  
Ru 16.42570 15.58600 15.86340  
Ru 16.01640 9.38030 13.73480  
Ru 16.27750 10.84100 11.58950  
Ru 17.75900 11.36670 13.75250  
Ru 16.14710 10.84890 15.85190  
Ru 17.08740 13.15550 11.06780  
Ru 17.60860 13.05100 15.86310  
C 16.12330 6.51970 17.13240  
C 15.42270 7.65020 16.42030  
C 19.53960 17.55970 13.45040  
C 18.22880 17.00490 13.92920  
C 13.56100 9.13240 5.98190  
C 13.57830 10.12150 7.15710  
C 6.92280 18.56010 14.94160  
C 8.20750 19.21480 14.50850  
C 20.70120 13.59800 8.49690  
C 19.40250 13.51780 9.25820  
C 7.55730 16.80890 8.84830  
C 0.77550 15.09200 9.37830  
C 5.09600 11.23660 13.69980  
C 6.45350 11.88270 13.58310  
C 15.21600 12.90600 21.98030  
C 14.96100 13.13710 20.52090  
C 21.86870 12.41220 14.97270  
C 20.36370 12.34520 14.88540  
C 10.01270 6.93930 10.19930  
C 10.45220 8.09920 11.05270  
O 9.02880 18.38810 13.78270  
O 8.52550 20.36990 14.72320  
O 12.45190 10.59050 7.56030  
O 14.71010 10.41040 7.67620  
O 17.20330 17.13180 13.15050  
O 18.18530 16.43950 15.06760  
O 16.19730 8.48880 15.80040  
O 14.15850 7.70850 16.52500  
O 18.35110 13.94770 8.66290  
O 19.41300 13.01400 10.42920  
O 9.15460 16.41630 10.56240  
O 9.33610 15.23800 8.60890

O 7.46660 11.11940 13.45990  
O 6.49840 13.16330 13.64080  
O 15.84500 12.64840 19.67730  
O 13.93040 13.75490 20.14800  
O 19.70680 13.13200 15.65870  
O 19.85930 11.50170 14.06830  
O 10.59080 7.90050 12.30490  
O 10.62480 9.23240 10.46700  
H 7.93020 15.92970 13.38430  
H 11.25310 19.41440 14.91250  
H 12.03800 18.09680 17.51570  
H 11.03920 12.69190 18.83360  
H 8.11110 14.00490 11.73700  
H 8.15590 14.28190 15.31320  
H 9.58740 13.14470 9.73950  
H 11.04170 15.83470 9.77420  
H 12.17970 14.93150 18.93560  
H 12.40970 19.46130 12.53560  
H 14.92510 19.29310 12.44320  
H 13.12790 19.49210 15.11130  
H 9.66650 10.17660 12.64400  
H 10.92340 12.60170 8.29750  
H 13.46790 10.50490 9.82160  
H 10.81590 9.10630 15.61450  
H 13.96790 16.93330 8.29060  
H 13.63720 17.06780 18.86700  
H 13.53460 10.83730 18.74070  
H 15.21690 19.08010 14.55130  
H 16.10500 15.45100 19.00300  
H 15.60220 17.80490 9.71630  
H 15.73320 17.85940 17.47260  
H 10.87090 10.66820 17.49330  
H 12.40810 8.15890 14.31640  
H 16.36010 12.33440 8.44310  
H 15.02330 9.76000 11.07710  
H 16.14410 10.55510 17.63610  
H 17.67340 14.63810 16.80310  
H 18.09950 14.89750 11.61380  
H 17.60210 12.86660 17.63050  
H 18.08300 13.21730 13.48620  
H 17.94020 9.68460 13.71610  
H 18.06410 11.29550 11.96020  
H 17.94930 11.23790 15.56070  
H 15.46590 5.64760 17.21720  
H 16.37600 6.86040 18.14880  
H 17.05780 6.26290 16.62190  
H 16.62230 18.18690 15.57610  
H 20.31970 17.41150 14.20330  
H 19.42460 18.63030 13.23200  
H 19.82310 17.06050 12.51260  
H 10.51840 15.85640 17.44710  
H 14.38100 8.45990 6.06120  
H 13.70950 9.76590 5.06100  
H 12.59440 8.67210 5.91280  
H 13.57530 18.52610 16.69300  
H 6.34850 19.26050 15.55510  
H 7.12040 17.64150 15.50720  
H 6.33530 18.26960 14.05910  
H 9.33690 13.56890 17.46610  
H 21.55220 13.49780 9.17780  
H 20.75650 14.54270 7.94300  
H 20.73570 12.78020 7.76240  
H 19.61720 17.50220 15.98630  
H 7.24090 16.37930 7.89290  
H 7.79840 17.87270 8.71360  
H 6.74540 16.74460 9.58410  
H 9.10410 11.62210 15.42600  
H 4.31570 11.90400 13.31820  
H 4.09300 11.94410 14.76410  
H 5.08220 10.27700 13.17180  
H 12.43810 14.75470 8.24770  
H 14.64670 13.61660 22.58680  
H 16.28990 12.97780 22.19360  
H 14.89270 11.88490 22.23400  
H 12.21800 18.02660 9.67120  
H 22.32170 11.83110 14.16940  
H 22.18640 12.01010 15.94540  
H 22.19560 13.45870 14.92930  
H 16.91040 15.70510 9.83560  
H 10.22250 7.13180 9.14230  
H 8.92700 6.08010 10.32360  
H 14.80960 6.01520 10.53250  
H 14.80060 8.19560 13.28990

188

./Thermo\_CH3COOH\_10-H\_1.2.xyz

Ru 15.29330 13.39200 15.62620  
Ru 15.10920 13.50510 11.29550  
Ru 15.37050 11.91400 13.46580  
Ru 13.64800 15.52180 15.80800  
Ru 13.37880 15.74210 11.46630  
Ru 12.52990 12.99810 15.70020  
Ru 13.74350 14.06840 13.57550  
Ru 12.32200 13.20300 11.30900  
Ru 12.57610 11.57900 13.45990  
Ru 12.94520 16.23350 13.70610  
Ru 11.00890 13.77970 13.65080

|    |          |          |          |
|----|----------|----------|----------|
| Ru | 8.28790  | 13.41310 | 13.54110 |
| Ru | 9.35470  | 15.90330 | 13.63460 |
| Ru | 9.81500  | 11.21720 | 13.65920 |
| Ru | 10.40360 | 18.22090 | 13.93500 |
| Ru | 10.84130 | 13.82240 | 9.36260  |
| Ru | 9.83450  | 12.75290 | 11.61660 |
| Ru | 9.88790  | 12.72000 | 15.75360 |
| Ru | 11.30710 | 13.42440 | 17.92870 |
| Ru | 11.95720 | 16.32850 | 9.37830  |
| Ru | 10.67690 | 15.31900 | 11.51220 |
| Ru | 10.80730 | 15.19340 | 15.95780 |
| Ru | 12.35550 | 15.82420 | 18.81300 |
| Ru | 11.72560 | 17.76840 | 11.76780 |
| Ru | 12.99380 | 18.63220 | 13.89780 |
| Ru | 11.81710 | 17.74330 | 16.11200 |
| Ru | 11.49770 | 9.07580  | 13.55450 |
| Ru | 12.41490 | 11.77960 | 9.12600  |
| Ru | 11.22900 | 10.66850 | 11.30530 |
| Ru | 11.46580 | 10.65500 | 15.59070 |
| Ru | 12.75260 | 11.30760 | 17.81640 |
| Ru | 13.48490 | 14.20850 | 9.33690  |
| Ru | 13.93770 | 13.76060 | 17.83740 |
| Ru | 14.47790 | 16.59720 | 9.33830  |
| Ru | 14.91590 | 16.55560 | 13.69400 |
| Ru | 14.93050 | 16.19650 | 17.90490 |
| Ru | 14.43970 | 18.05460 | 11.59620 |
| Ru | 14.57950 | 17.92450 | 15.94400 |
| Ru | 14.23490 | 9.45700  | 13.41030 |
| Ru | 13.61080 | 8.54980  | 15.69680 |
| Ru | 15.11060 | 12.13620 | 9.03360  |
| Ru | 13.99980 | 11.04080 | 11.24200 |
| Ru | 14.16530 | 10.88610 | 15.62060 |
| Ru | 15.51740 | 11.64290 | 17.78000 |
| Ru | 16.15360 | 14.51600 | 9.15820  |
| Ru | 16.35040 | 14.41800 | 13.48260 |
| Ru | 16.52430 | 14.11800 | 17.70380 |
| Ru | 16.94850 | 16.04260 | 11.41870 |
| Ru | 16.39440 | 15.90790 | 15.74940 |
| Ru | 16.80400 | 9.82940  | 13.30080 |
| Ru | 16.66030 | 11.36050 | 11.21540 |
| Ru | 18.13270 | 12.09870 | 13.34280 |
| Ru | 16.82400 | 11.25090 | 15.49880 |
| Ru | 17.66560 | 13.94870 | 11.34530 |
| Ru | 17.95420 | 13.67170 | 15.40930 |
| C  | 9.38280  | 7.56650  | 19.74840 |
| C  | 12.65460 | 8.41430  | 18.73260 |
| C  | 14.08100 | 9.17650  | 5.96850  |
| C  | 13.93980 | 10.12500 | 7.13100  |
| C  | 8.81330  | 20.81810 | 17.05230 |
| C  | 9.04660  | 19.79400 | 16.22850 |
| C  | 19.12410 | 18.74610 | 13.95880 |
| C  | 17.92150 | 17.88720 | 14.25980 |
| C  | 20.40470 | 15.14940 | 8.11130  |
| C  | 19.16080 | 14.77220 | 8.87800  |
| C  | 7.32650  | 16.28020 | 8.69060  |
| C  | 8.55200  | 15.61900 | 9.26180  |
| C  | 5.55660  | 10.03430 | 14.05490 |
| C  | 6.77240  | 10.89340 | 13.81740 |
| C  | 15.88550 | 9.87550  | 21.69720 |
| C  | 15.43350 | 10.84750 | 20.62340 |
| C  | 22.17750 | 13.53940 | 14.27640 |
| C  | 20.68550 | 13.32340 | 14.29370 |
| C  | 10.36500 | 6.49970  | 10.17550 |
| C  | 10.81270 | 7.67020  | 11.01180 |
| O  | 10.69900 | 19.36250 | 16.90160 |
| O  | 9.22430  | 19.40250 | 15.17800 |
| O  | 15.02550 | 10.57750 | 7.64430  |
| O  | 12.75970 | 10.42630 | 7.51300  |
| O  | 12.90290 | 7.91290  | 17.49100 |
| O  | 12.90380 | 9.69460  | 18.96020 |
| O  | 17.99600 | 17.16340 | 15.32190 |
| O  | 16.91870 | 17.91940 | 13.49180 |
| O  | 18.04030 | 14.98340 | 8.29670  |
| O  | 19.31660 | 14.27900 | 10.04840 |
| O  | 8.94730  | 16.90590 | 10.41320 |
| O  | 9.14090  | 14.73230 | 8.55680  |
| O  | 7.91100  | 10.30890 | 13.83090 |
| O  | 6.59150  | 12.14350 | 13.63290 |
| O  | 14.78140 | 11.85890 | 20.89530 |
| O  | 15.83170 | 10.48730 | 19.40680 |
| O  | 20.21330 | 12.47530 | 13.46240 |
| O  | 20.00460 | 13.99220 | 15.15220 |
| O  | 11.06000 | 7.46550  | 12.24360 |
| O  | 10.89260 | 8.80900  | 10.41400 |
| H  | 7.37610  | 14.09800 | 12.29540 |
| H  | 11.47850 | 7.92830  | 14.85340 |
| H  | 7.83080  | 15.18240 | 13.98660 |
| H  | 8.70670  | 17.47250 | 13.67320 |
| H  | 8.01660  | 13.54810 | 11.79330 |
| H  | 9.82400  | 12.54100 | 17.54700 |
| H  | 10.71060 | 16.90420 | 8.51900  |
| H  | 8.36510  | 16.18680 | 12.43000 |
| H  | 9.54910  | 12.74480 | 9.86360  |
| H  | 10.60400 | 15.28230 | 17.78030 |
| H  | 11.42370 | 17.89720 | 9.94700  |
| H  | 12.89570 | 19.23560 | 12.18560 |

|   |          |          |          |
|---|----------|----------|----------|
| H | 11.96450 | 17.53160 | 17.85280 |
| H | 11.18990 | 12.44110 | 8.12530  |
| H | 10.13500 | 9.79370  | 12.50700 |
| H | 10.99120 | 10.96420 | 9.47380  |
| H | 10.19840 | 9.67090  | 14.77700 |
| H | 11.29570 | 10.50760 | 17.39020 |
| H | 11.95210 | 14.90480 | 8.26980  |
| H | 12.49100 | 14.30460 | 19.04110 |
| H | 13.16200 | 17.26250 | 8.37560  |
| H | 13.60310 | 16.70680 | 18.97870 |
| H | 14.68750 | 18.66210 | 13.20280 |
| H | 14.41920 | 18.29410 | 9.82770  |
| H | 16.07770 | 17.85400 | 11.37220 |
| H | 14.26440 | 19.38550 | 15.06060 |
| H | 13.36960 | 10.33370 | 9.84870  |
| H | 12.62630 | 9.68950  | 12.29590 |
| H | 14.60780 | 9.01910  | 15.15330 |
| H | 14.15990 | 12.21530 | 18.85440 |
| H | 14.97200 | 15.38500 | 8.08390  |
| H | 16.76400 | 12.65810 | 18.62980 |
| H | 17.78650 | 15.74420 | 11.42230 |
| H | 15.24990 | 17.95340 | 17.56720 |
| H | 15.70020 | 8.44720  | 13.17680 |
| H | 16.70970 | 11.34270 | 9.44940  |
| H | 15.47370 | 10.27730 | 10.55130 |
| H | 18.55760 | 10.42900 | 13.34680 |
| H | 16.99190 | 10.78760 | 17.19260 |
| H | 16.96570 | 9.55290  | 15.12030 |
| H | 17.10640 | 13.18250 | 9.87780  |
| H | 18.35890 | 12.09520 | 11.53850 |
| H | 18.17880 | 13.99220 | 13.18880 |
| H | 18.50850 | 11.94520 | 15.13220 |
| H | 8.25150  | 13.00940 | 15.27290 |
| H | 11.60540 | 19.57660 | 14.27270 |
| H | 11.43340 | 12.06580 | 18.95430 |
| H | 15.26420 | 14.63020 | 18.92910 |
| H | 13.20960 | 8.04680  | 14.00980 |
| H | 16.04400 | 13.26080 | 7.94060  |
| H | 16.35770 | 16.38330 | 9.69530  |
| H | 16.74570 | 15.99640 | 17.63470 |
| H | 18.13590 | 13.46440 | 17.22560 |
| H | 12.18050 | 6.50540  | 19.54900 |
| H | 12.15650 | 7.95610  | 20.75220 |
| H | 15.95130 | 18.67000 | 15.63160 |
| H | 9.25340  | 15.68480 | 15.46270 |
| H | 13.16470 | 8.59360  | 5.83240  |
| H | 14.94530 | 8.51900  | 6.11800  |
| H | 14.26250 | 9.76560  | 5.05710  |
| H | 13.13150 | 18.63490 | 16.78150 |
| H | 7.90640  | 20.32610 | 17.43390 |
| H | 8.49530  | 21.60510 | 16.35790 |
| H | 9.36900  | 21.24330 | 17.89340 |
| H | 9.35600  | 14.24600 | 16.43400 |
| H | 19.05580 | 19.16490 | 12.95000 |
| H | 20.04100 | 18.15350 | 14.06940 |
| H | 19.16870 | 19.56560 | 14.69050 |
| H | 10.30870 | 16.86300 | 16.30470 |
| H | 21.29190 | 14.69750 | 8.56550  |
| H | 20.51060 | 16.24400 | 8.12870  |
| H | 20.30670 | 14.84350 | 7.06270  |
| H | 10.30160 | 18.74560 | 12.19930 |
| H | 6.90930  | 15.68110 | 7.87470  |
| H | 7.62070  | 17.26380 | 8.29500  |
| H | 6.57960  | 16.44620 | 9.47580  |
| H | 18.04460 | 15.15890 | 16.27980 |
| H | 4.65670  | 10.52140 | 13.66570 |
| H | 5.43700  | 9.89230  | 15.13930 |
| H | 5.69350  | 9.04610  | 13.60160 |
| H | 14.71180 | 10.18010 | 17.13380 |
| H | 16.38710 | 8.99720  | 21.27860 |
| H | 15.01090 | 9.56850  | 22.28490 |
| H | 16.57040 | 10.40390 | 22.37510 |
| H | 17.13280 | 9.62930  | 11.55920 |
| H | 22.43860 | 14.46310 | 14.80220 |
| H | 22.54420 | 13.56020 | 13.24340 |
| H | 22.66630 | 12.69270 | 14.78620 |
| H | 14.39860 | 9.37630  | 11.62140 |
| H | 10.60640 | 6.66360  | 9.12020  |
| H | 9.27290  | 6.40280  | 10.26900 |
| H | 10.82050 | 5.57360  | 10.54340 |
| H | 13.68680 | 12.75290 | 8.11830  |

205  
./Thermo\_CH3COOH\_10-H\_1.6.xyz

|    |          |          |          |
|----|----------|----------|----------|
| Ru | 15.43540 | 12.99290 | 15.40250 |
| Ru | 15.00170 | 13.34180 | 11.06000 |
| Ru | 15.13730 | 11.61780 | 13.13480 |
| Ru | 14.09750 | 15.33740 | 15.78020 |
| Ru | 13.63010 | 15.78100 | 11.41620 |
| Ru | 12.62440 | 13.01910 | 15.62710 |
| Ru | 13.87560 | 13.98220 | 13.45120 |
| Ru | 12.17890 | 13.43360 | 11.41220 |
| Ru | 12.32150 | 11.68260 | 13.37530 |
| Ru | 12.49180 | 16.34420 | 13.81910 |
| Ru | 11.03730 | 14.11210 | 13.72480 |
| Ru | 8.13190  | 14.08910 | 14.02970 |
| Ru | 9.84660  | 16.55340 | 13.99640 |



Ru 9.54720 11.54280 13.65700  
Ru 11.36670 18.64380 14.14700  
Ru 10.63500 14.50360 9.40350  
Ru 9.64490 13.45950 11.66870  
Ru 9.97600 13.08100 15.85360  
Ru 11.61000 13.61420 17.92500  
Ru 12.16110 15.66090 9.51920  
Ru 10.95470 15.80310 11.73230  
Ru 11.24790 15.52010 16.05210  
Ru 12.99860 15.80090 18.03980  
Ru 12.42350 18.10780 11.82660  
Ru 13.98470 18.74690 13.90120  
Ru 12.96000 17.67450 16.13020  
Ru 11.14370 9.25610 13.35880  
Ru 11.86250 12.26750 9.05100  
Ru 10.79460 11.10830 11.26830  
Ru 11.26680 10.77080 15.50890  
Ru 12.72730 11.25950 17.64110  
Ru 13.41390 14.39130 9.25570  
Ru 14.22820 13.47600 17.78700  
Ru 14.74250 16.63250 9.26410  
Ru 15.15860 16.27800 13.51730  
Ru 15.59600 15.78070 17.78530  
Ru 15.16320 18.04250 11.50720  
Ru 15.61140 17.62700 15.85250  
Ru 13.78920 9.33850 13.12110  
Ru 12.69030 8.42850 15.51560  
Ru 14.56810 12.10170 8.76340  
Ru 13.50920 11.07680 11.05580  
Ru 13.92040 10.69980 15.30650  
Ru 15.56010 11.14400 17.50500  
Ru 15.97400 14.25300 8.82310  
Ru 16.51320 13.89280 13.17930  
Ru 16.86200 13.53480 17.40790  
Ru 16.33720 15.67130 11.21010  
Ru 16.81800 15.30250 15.49240  
Ru 16.26200 9.34630 12.74390  
Ru 16.13900 10.96800 10.77240  
Ru 17.94740 11.42990 12.74200  
Ru 16.69870 10.58890 15.03990  
Ru 17.59400 13.34610 10.80880  
Ru 18.09490 12.93730 15.16620  
C 12.54450 7.35780 19.78960  
C 12.66250 8.21710 18.62920  
C 19.89010 18.56600 15.91910  
C 18.56710 17.84110 15.83200  
C 12.76590 9.03180 6.19140  
C 12.89840 10.16740 7.17330  
C 7.65480 19.63980 16.26830  
C 8.72800 18.90780 15.50700  
C 20.18280 14.59050 7.47960  
C 18.97670 14.26190 8.32550  
C 7.27380 16.00320 7.09740  
C 8.01770 15.40730 8.27790  
C 5.15730 10.79970 14.17050  
C 6.47220 11.53520 14.02830  
C 15.02540 11.63130 21.93830  
C 15.37650 11.88730 20.46440  
C 22.49130 14.17770 15.19170  
C 21.05220 13.98110 14.83190  
C 8.72050 7.32940 10.22840  
C 9.55210 8.33680 10.98470  
D 9.03420 19.51480 15.29720  
D 8.48150 17.70530 15.13850  
D 14.08970 10.49220 7.52470  
D 11.83250 10.72040 7.59860  
D 18.60460 16.57960 15.64390  
D 17.50980 18.55360 15.96670  
D 12.54370 9.55610 18.08660  
D 12.90950 7.78220 17.48600  
D 17.84190 14.67050 7.89290  
D 19.18130 13.61480 9.41000  
D 9.29480 15.18240 8.01420  
D 7.45850 15.20240 9.36350  
D 7.51730 10.80890 13.93200  
D 6.41840 12.81070 14.01760  
D 14.76170 12.95080 20.15130  
D 15.80850 10.97420 19.66160  
D 20.29560 13.25750 15.50580  
D 20.67150 14.62730 13.73460  
D 9.76000 9.46650 10.41430  
H 10.01460 7.97660 12.12120  
H 7.20140 15.16510 13.05560  
H 13.78190 20.27210 13.19080  
H 11.44720 7.83190 14.40880  
H 15.99350 19.38630 11.21600  
H 8.77850 15.43080 14.80840  
H 8.40450 12.74700 12.88250  
H 9.97460 18.17910 13.25020  
H 7.57860 14.63720 12.43700  
H 9.07470 14.31160 10.25280  
H 8.23960 13.45840 15.64500  
H 9.30450 16.02210 12.45440  
H 11.20420 15.53360 17.09900  
H 12.64920 17.55970 17.86290  
H 10.82270 17.63560 11.51720

H 12.17480 18.37970 10.10350  
H 11.55110 19.52370 12.65520  
H 12.77750 19.36630 15.12670  
H 9.62930 9.81640 14.04590  
H 11.91320 9.92930 11.97870  
H 10.29270 11.80900 9.63650  
H 11.70450 12.13730 18.06790  
H 11.10190 10.80220 17.31770  
H 13.38580 17.53650 8.55510  
H 14.41530 16.40360 18.97500  
H 15.20420 18.31110 9.80590  
H 14.31460 20.41390 13.94320  
H 15.96160 17.47870 17.59830  
H 13.17840 12.93000 7.94330  
H 13.68120 9.36220 11.33440  
H 14.73340 10.18580 10.09460  
H 15.68050 9.57100 17.77690  
H 16.50810 16.07720 9.48470  
H 15.66760 13.02000 7.61910  
H 17.14150 11.89940 17.95840  
H 15.54900 18.87680 12.96620  
H 15.03090 8.08870 12.81080  
H 16.09470 11.15780 9.01070  
H 16.34090 9.13010 11.00540  
H 18.12870 9.83650 12.31970  
H 16.83960 10.16500 16.83640  
H 16.93040 8.96540 14.53960  
H 16.90880 12.88360 9.23580  
H 17.95040 11.49740 10.90180  
H 19.47590 11.02030 12.52160  
H 18.43590 13.03000 16.94390  
H 19.02550 14.40960 14.20240  
H 19.02580 12.28150 13.75420  
H 18.21610 11.30270 15.77070  
H 9.15440 11.29820 11.96220  
H 9.42350 11.42180 15.52820  
H 9.96080 12.98750 17.63860  
H 10.39150 16.26450 10.04140  
H 12.02070 15.34460 8.30700  
H 12.84360 14.26650 19.06740  
H 13.79780 19.11740 11.19300  
H 10.76710 13.12790 8.09340  
H 12.13600 10.61880 10.02850  
H 11.23000 9.08550 16.09640  
H 14.68530 15.34460 7.99900  
H 15.31580 19.15790 14.96570  
H 15.81710 14.29540 18.73090  
H 16.80100 17.47300 11.41730  
H 12.40570 8.21100 12.79940  
H 14.14040 10.09040 17.03950  
H 7.66470 7.22640 14.69190  
H 14.15750 11.79470 18.52000  
H 17.36530 15.26800 17.30290  
H 17.99040 15.08110 11.08130  
H 16.91150 15.77770 12.84140  
H 19.70900 14.45610 13.59880  
H 11.05730 6.54190 19.53170  
H 12.20240 7.87830 20.68920  
H 13.53080 6.91070 19.97910  
H 16.51210 16.98520 14.44410  
H 19.74890 19.64520 15.80180  
H 20.57750 18.18260 15.15660  
H 20.33690 18.36970 16.90470  
H 7.15500 15.02090 14.89680  
H 11.74040 8.96540 5.81450  
H 13.02830 8.09220 6.69870  
H 13.47350 9.16730 5.36400  
H 14.40670 18.48280 16.81850  
H 6.06360 19.26560 15.99000  
H 7.73010 20.71850 16.09300  
H 7.80080 19.45760 17.34350  
H 9.72430 14.70800 16.43630  
H 21.02360 13.93880 7.73810  
H 20.47220 15.63380 7.67560  
H 19.93570 14.50660 6.41540  
H 18.72290 13.03210 12.05820  
H 7.39560 17.09670 7.12940  
H 6.20570 15.77310 7.17640  
H 7.68200 15.64730 6.14460  
H 14.09290 7.36160 15.44280  
H 4.31490 11.49040 14.06940  
H 5.12120 10.32500 15.16170  
H 5.09350 10.00190 13.42070  
H 11.21230 17.29620 16.01040  
H 16.32150 10.79890 22.08140  
H 14.66640 11.39270 22.41930  
H 16.01320 12.54340 22.40950  
H 18.27630 10.42000 14.07590  
H 23.11790 13.60910 14.48890  
H 22.67330 13.81940 16.20860  
H 22.76610 15.23560 15.09590  
H 15.37250 9.56210 15.32970  
H 8.29120 6.59310 10.91550  
H 9.37010 6.80270 9.51360  
H 7.93450 7.83680 9.65750  
H 9.99320 16.21350 16.76500

./Thermo\_CH3COOH\_10.xyz

Ru 14.96390 13.51650 15.97320  
 Ru 15.06760 13.40690 11.64130  
 Ru 15.03850 11.90940 13.86310  
 Ru 13.56860 15.69810 15.94120  
 Ru 13.53110 15.68110 11.57940  
 Ru 12.23720 13.31370 15.89000  
 Ru 13.69410 14.18010 13.79620  
 Ru 12.34950 13.30670 11.68720  
 Ru 12.29900 11.69910 13.77570  
 Ru 12.13970 16.45900 13.75780  
 Ru 10.98580 14.04700 13.71830  
 Ru 8.37950 13.97760 13.62540  
 Ru 9.52700 16.17810 13.77260  
 Ru 9.56850 11.59520 13.80790  
 Ru 10.67120 18.48260 13.65870  
 Ru 10.97310 13.86640 9.56060  
 Ru 9.77670 13.11550 11.70650  
 Ru 9.61280 13.26590 15.75200  
 Ru 10.84430 14.07590 17.88890  
 Ru 12.29040 16.33910 9.52620  
 Ru 10.82650 15.51470 11.59340  
 Ru 10.83290 15.53720 15.80910  
 Ru 12.07630 16.40330 17.90660  
 Ru 12.12730 17.85080 11.66060  
 Ru 13.37150 18.78280 13.68160  
 Ru 12.05790 17.95550 15.87850  
 Ru 11.11780 9.42810 13.89980  
 Ru 12.41950 11.77120 9.55330  
 Ru 11.06700 10.99360 11.65080  
 Ru 11.02710 11.01950 15.82780  
 Ru 12.26180 11.82630 17.91780  
 Ru 13.62390 14.02300 9.57940  
 Ru 13.51080 14.09590 18.06340  
 Ru 14.81360 16.27990 9.51410  
 Ru 14.91210 16.61010 13.83370  
 Ru 14.62000 16.50290 18.07150  
 Ru 14.67850 17.94450 11.70120  
 Ru 14.46880 18.02300 15.96110  
 Ru 13.85990 9.59820 13.84380  
 Ru 12.51690 8.83280 15.77440  
 Ru 15.01550 11.71400 9.66700  
 Ru 13.73520 11.07000 11.69000  
 Ru 13.65880 11.02930 15.94460  
 Ru 14.86590 11.90650 17.96030  
 Ru 16.17540 14.30190 9.52620  
 Ru 16.40470 14.19420 13.86310  
 Ru 16.04580 14.46800 18.04260  
 Ru 16.17990 15.70920 11.64940  
 Ru 16.20430 15.82470 16.01400  
 Ru 16.34260 9.69270 13.97260  
 Ru 16.36770 11.12430 11.79860  
 Ru 17.70770 11.92270 13.84490  
 Ru 16.30420 11.25310 15.93420  
 Ru 17.09670 13.56510 11.71900  
 Ru 17.54190 13.41120 16.08210  
 C 5.18800 11.03600 13.64100  
 C 6.54100 11.69670 13.65950  
 C 14.32890 12.66170 22.21580  
 C 14.31590 12.81560 20.71720  
 C 20.13200 13.58830 8.10320  
 C 10.99720 13.61770 9.01320  
 C 7.60080 16.47840 8.70210  
 C 8.81330 15.85280 9.33770  
 C 9.56530 21.43850 16.69530  
 C 10.20410 20.27210 15.99110  
 C 10.94090 18.47150 14.03000  
 C 17.76440 17.76090 14.30700  
 C 15.89950 6.04180 15.68030  
 C 14.87730 7.07100 15.29440  
 C 13.77410 9.79100 5.93740  
 C 13.74460 10.47470 7.27580  
 C 21.73200 12.28960 15.53550  
 C 20.25570 12.46350 15.30090  
 C 8.95430 7.23710 10.61330  
 C 9.74730 8.31820 11.49480  
 O 6.56340 12.98320 13.63540  
 O 7.57700 10.94580 13.69260  
 O 13.68250 13.79860 20.21540  
 O 14.94020 11.91320 20.03230  
 O 17.85830 13.89000 8.46780  
 O 19.16220 13.39200 10.25530  
 O 9.11820 16.22670 10.51850  
 O 9.46400 14.96930 8.66460  
 O 10.99440 19.52990 16.67930  
 O 9.93900 20.08960 14.75528  
 O 16.76210 17.86510 13.60300  
 O 17.74030 17.05970 15.46240  
 O 13.80080 7.16180 15.96390  
 O 15.14400 7.84080 14.27800  
 O 14.86030 10.75250 7.83240  
 O 12.59740 10.72550 7.80500  
 O 10.60960 13.21110 16.11710  
 O 19.71920 11.84570 14.31640  
 O 10.02100 8.15290 12.73920

O 10.10390 9.34040 10.81840  
 H 5.28340 9.94950 13.72670  
 H 4.67050 11.29110 12.70560  
 H 4.57730 11.42690 14.46590  
 H 15.25120 12.16780 22.54220  
 H 13.40630 12.02690 22.51310  
 H 14.21930 13.63500 22.70270  
 H 21.02710 13.06230 8.57640  
 H 20.49840 14.62350 7.89070  
 H 19.92840 13.11900 7.14780  
 H 7.54790 16.23350 7.63670  
 H 7.62530 17.56540 8.84080  
 H 6.69900 16.10910 9.20610  
 H 8.59140 21.66780 16.24980  
 H 10.21280 22.32120 16.58190  
 H 9.46400 21.22580 17.76520  
 H 19.73540 18.47720 14.87640  
 H 18.82550 19.49560 13.70070  
 H 19.50720 17.94290 13.18520  
 H 16.50620 5.74880 14.81680  
 H 15.41320 5.16940 16.13020  
 H 16.56770 6.48410 16.43600  
 H 12.77640 9.77430 5.48770  
 H 14.12940 8.75850 6.06960  
 H 14.40630 10.20940 5.27520  
 H 17.93930 15.32330 11.84570  
 H 16.43090 10.64640 10.06240  
 H 13.55020 17.07370 8.46020  
 H 10.90910 15.54960 18.96270  
 H 11.57520 17.93880 9.91450  
 H 13.33770 17.20520 19.04950  
 H 9.18220 13.55320 17.49360  
 H 18.13050 11.72530 12.06300  
 H 22.19400 11.73560 14.71290  
 H 21.88510 11.74500 16.47800  
 H 22.20720 13.27290 15.64750  
 H 17.78620 14.04080 17.74640  
 H 8.87870 7.42090 9.73920  
 H 7.94690 7.19980 11.25290  
 H 9.42350 6.26100 10.99360  
 H 8.98070 17.88750 13.50470

./Thermo\_CH3COOH\_12-H\_0.4.xyz

Ru 15.20030 13.55030 15.41330  
 Ru 15.35780 13.47700 11.01590  
 Ru 15.29030 11.97850 13.29820  
 Ru 13.85400 15.73580 15.37430  
 Ru 13.81880 15.80130 10.98140  
 Ru 12.47700 13.40880 15.37950  
 Ru 13.95380 14.27300 13.19790  
 Ru 12.58300 13.42400 11.00820  
 Ru 12.52450 11.80990 13.18820  
 Ru 12.54280 16.55130 13.22590  
 Ru 11.21230 14.11550 13.14430  
 Ru 8.61330 14.20680 13.14200  
 Ru 9.81000 16.34570 13.22390  
 Ru 9.81250 11.79020 13.23190  
 Ru 11.02880 18.62000 13.14610  
 Ru 11.25700 14.06280 8.99060  
 Ru 9.91650 13.33650 11.12100  
 Ru 9.85280 13.42100 15.24020  
 Ru 11.08130 14.25580 17.40780  
 Ru 12.55730 16.50630 8.95000  
 Ru 11.14230 15.65880 11.09710  
 Ru 11.12130 15.68580 15.20580  
 Ru 12.41000 16.56950 17.43690  
 Ru 12.42580 17.97350 11.13870  
 Ru 13.71630 18.90680 13.23090  
 Ru 12.37100 18.04250 15.36210  
 Ru 11.31580 9.54650 13.25970  
 Ru 12.63900 11.99630 8.92970  
 Ru 11.27300 11.16100 11.08280  
 Ru 11.18080 11.05650 15.35720  
 Ru 12.46930 11.88470 17.44890  
 Ru 13.91950 14.19000 8.93180  
 Ru 13.78130 14.19260 17.49020  
 Ru 15.12930 16.55950 8.98660  
 Ru 15.15600 16.67430 13.24340  
 Ru 14.96700 16.61630 17.46600  
 Ru 14.97700 18.09200 11.12590  
 Ru 14.81900 18.08650 15.46430  
 Ru 14.13600 9.59750 13.10380  
 Ru 12.71100 8.95300 15.18110  
 Ru 15.30680 11.92530 8.91930  
 Ru 13.95630 11.13750 11.04120  
 Ru 13.89400 11.07450 15.30700  
 Ru 15.18570 12.03450 17.49440  
 Ru 16.54670 14.40300 8.97550  
 Ru 16.58200 14.26280 13.24210  
 Ru 16.41730 14.36500 17.47410  
 Ru 16.50150 15.81350 11.08040  
 Ru 16.46130 15.87000 15.34230  
 Ru 16.58030 9.74850 13.38510  
 Ru 16.60030 11.18030 11.15090  
 Ru 17.92530 11.95220 13.22150  
 Ru 16.58700 11.33730 15.40530

Ru 17.99500 13.66880 11.14100  
Ru 17.87750 13.52180 15.46090  
C 5.38330 11.31900 13.37600  
C 6.74500 11.96530 13.33380  
C 14.05550 12.80850 21.67800  
C 14.22900 12.92030 20.18460  
C 20.27970 14.32760 7.90920  
C 19.50030 14.15030 8.65640  
C 7.70800 16.54180 8.41570  
C 8.99780 15.98480 8.95540  
C 10.19170 21.75750 16.07450  
C 10.71830 20.51650 15.40710  
C 19.19200 18.68030 13.36270  
C 18.00950 17.80980 13.68280  
C 16.02450 6.11000 15.23680  
C 15.01950 7.12830 14.78000  
C 13.80200 10.11750 5.17790  
C 13.87250 10.82250 6.59730  
C 21.03020 11.67200 15.17650  
C 20.42520 12.07680 14.85350  
C 8.68530 7.69530 10.27940  
C 9.60480 8.68880 10.93920  
C 10.55150 16.14780 21.34940  
C 10.91830 15.89480 19.91080  
C 10.53900 8.17650 18.00890  
C 11.18600 9.28550 17.96440  
O 6.78880 13.24250 13.46850  
O 7.75780 11.20850 13.15110  
O 13.87650 14.01750 19.62690  
O 14.69780 11.90300 19.56270  
O 18.43900 14.62680 8.11800  
O 19.53150 13.55600 9.78740  
O 9.44650 16.47280 10.04670  
O 9.56980 15.04550 8.29220  
O 11.46200 19.73980 16.10830  
O 10.41430 20.30350 14.18460  
O 17.08820 17.69130 12.79430  
O 17.96130 17.24000 14.82570  
O 13.92350 7.23330 15.41700  
O 15.31650 7.86300 13.75140  
O 15.01850 11.13470 6.96050  
O 12.75450 11.03350 7.11850  
O 19.86380 12.92800 15.63460  
O 19.86580 11.54230 13.83620  
O 10.07800 8.37900 12.88950  
O 9.87300 9.77500 10.33010  
O 11.62420 16.79600 19.32480  
O 10.53100 14.80730 19.37130  
O 10.89950 9.22100 16.68550  
O 11.71880 10.23800 18.53310  
H 9.29330 18.05630 13.09780  
H 12.55030 14.94600 7.86790  
H 8.31130 13.96630 11.25510  
H 9.73570 11.81830 16.04900  
H 14.38580 19.71030 11.84430  
H 14.99400 19.52480 14.38760  
H 12.44500 10.14450 19.26550  
H 11.06930 12.66550 18.18130  
H 13.88430 10.71500 17.12750  
H 15.74730 18.18530 9.53990  
H 12.73450 8.70130 12.53770  
H 16.64680 12.73700 8.17310  
H 16.74350 10.95780 9.33500  
H 16.63680 12.75700 18.22780  
H 16.80100 16.17150 17.21430  
H 18.36080 13.76650 13.73140  
H 17.35750 9.66280 14.94090  
H 5.46480 10.26200 13.64920  
H 4.92880 11.38850 12.37650  
H 4.73230 11.85350 14.07600  
H 14.70180 12.02450 22.08570  
H 13.00800 12.54730 21.89120  
H 14.26680 13.77250 22.15640  
H 21.52000 13.56300 8.21180  
H 21.21400 15.31500 8.15670  
H 20.02550 14.29600 6.82760  
H 7.58480 16.28320 7.35900  
H 7.67850 17.62880 8.55630  
H 6.87380 16.10950 8.98820  
H 9.40430 22.21700 15.46970  
H 11.01750 22.47350 16.19830  
H 9.81730 11.51230 17.07600  
H 19.99780 18.51950 14.08550  
H 18.87850 19.73420 13.39880  
H 19.54070 18.47500 12.34250  
H 16.81580 5.96630 14.49470  
H 15.52830 5.16000 15.45260  
H 16.47430 6.46400 16.17670  
H 12.84950 10.32600 4.67950  
H 13.86680 9.03350 5.35470  
H 14.64830 10.40930 4.54660  
H 18.25450 15.41380 11.09030  
H 15.34830 9.85450 11.50530  
H 13.83600 17.36350 9.00670  
H 19.62330 15.95430 16.98710  
H 11.93330 18.09630 9.38050

H 13.75780 17.63300 18.17760  
H 9.38470 13.93980 16.88470  
H 18.37670 11.80800 11.45220  
H 22.31680 11.21600 14.30390  
H 21.81830 10.93730 15.99490  
H 22.40950 12.54060 15.52410  
H 9.89700 10.14030 14.19570  
H 8.37200 8.05550 9.29450  
H 7.80400 7.53250 10.91510  
H 9.19950 6.73030 10.17800  
H 18.13030 14.00030 17.15430  
H 9.69630 15.53200 21.64470  
H 10.34080 17.21180 21.50880  
H 11.41380 15.88080 21.97830  
H 14.41780 10.51080 9.38520  
H 11.02000 8.14800 19.79220  
H 10.64400 7.21380 18.29440  
H 9.46270 8.36200 18.94620  
H 15.21520 15.10880 7.83350

186  
./Thermo\_CH3COOH\_12-H\_0.8.xyz  
Ru 15.33680 13.34300 15.22350  
Ru 15.40200 13.33930 10.89270  
Ru 15.39550 11.81230 13.09460  
Ru 13.93200 15.66080 15.31920  
Ru 13.90800 15.64480 10.91270  
Ru 12.62120 13.25630 15.25210  
Ru 13.98450 14.12180 13.10710  
Ru 12.57130 13.38950 10.92860  
Ru 12.54500 11.73930 13.00550  
Ru 12.69580 16.47370 13.15370  
Ru 11.20480 14.03550 13.14300  
Ru 8.62550 13.99900 12.92200  
Ru 9.79280 16.22900 13.28240  
Ru 9.89030 11.67500 13.13490  
Ru 11.09380 18.43950 12.85340  
Ru 11.23850 14.07730 8.80490  
Ru 10.91550 13.20350 11.00840  
Ru 9.81320 13.36300 15.24020  
Ru 11.20400 13.99700 17.45200  
Ru 12.80670 16.44050 8.74220  
Ru 11.15150 15.72450 11.11990  
Ru 11.24830 15.62330 15.22900  
Ru 12.52080 16.38450 17.43040  
Ru 12.74150 17.91380 10.90910  
Ru 13.72100 18.86600 13.12710  
Ru 12.23450 18.03480 15.25260  
Ru 11.38820 9.43670 13.06160  
Ru 12.59900 11.88700 8.69540  
Ru 11.25880 11.03650 10.89580  
Ru 11.31650 10.89150 15.17720  
Ru 12.67050 11.68280 17.39240  
Ru 13.92150 14.03880 8.84290  
Ru 13.96550 14.00900 17.43850  
Ru 15.31830 16.32300 8.90710  
Ru 15.32630 16.45320 13.13940  
Ru 15.18250 16.42700 17.39090  
Ru 15.19630 17.91900 11.04560  
Ru 15.14050 18.04200 15.23600  
Ru 14.03300 9.57680 13.08090  
Ru 12.95050 8.74000 15.22640  
Ru 15.27180 11.88880 8.73390  
Ru 14.00050 11.05650 10.91820  
Ru 13.92200 11.02030 15.14530  
Ru 15.24450 11.81300 17.27360  
Ru 16.56400 14.12300 8.79790  
Ru 16.63180 14.15230 13.13260  
Ru 16.52100 14.20470 17.29440  
Ru 16.62000 15.64530 11.04480  
Ru 16.69780 15.79050 15.31320  
Ru 16.48980 9.52580 12.97480  
Ru 16.63680 11.04550 10.96650  
Ru 18.06250 11.61000 13.12530  
Ru 16.52300 10.73400 15.27890  
Ru 17.94790 13.40470 11.06280  
Ru 17.95480 13.29300 15.25190  
C 16.42130 6.54550 16.81190  
C 15.75850 7.77630 16.24170  
C 19.44500 18.30730 12.90740  
C 18.22400 17.56230 13.36450  
C 13.93650 9.21000 5.51620  
C 17.95730 10.16950 6.67680  
C 7.93180 19.14330 15.72320  
C 9.28200 18.81420 15.15620  
C 20.83050 13.73880 7.74510  
C 19.55400 13.69680 8.54570  
C 7.74600 16.78580 8.40160  
C 8.97180 16.07900 8.93000  
C 5.50180 10.99480 13.18460  
C 6.84180 11.67650 13.08110  
C 15.15580 12.58380 21.55970  
C 14.95030 12.73330 20.07380  
C 22.19830 12.12600 14.62030  
C 20.70100 12.25950 14.46040  
C 10.25830 6.98000 9.60800  
C 10.77600 8.11350 10.45300

C 9.44680 16.53700 20.60470  
C 10.31100 16.06800 19.46130  
C 9.48650 9.07200 18.84300  
C 10.39550 9.82800 17.90720  
D 9.28500 18.38300 13.90430  
D 10.32000 18.95000 15.84750  
D 10.23730 10.71200 7.00750  
D 15.07180 10.39800 7.24960  
D 17.20400 17.53130 12.57230  
D 18.24080 16.98930 14.49630  
D 16.52950 8.73150 15.89770  
D 14.47680 7.75900 16.17850  
D 15.47400 14.62730 7.93860  
D 19.61230 13.32230 9.76250  
D 9.31950 16.36320 10.13120  
D 9.57150 15.27600 8.13440  
D 7.87300 10.95350 12.90070  
D 6.86300 12.95650 13.20100  
D 15.68150 11.98750 19.31300  
D 14.08800 13.55900 19.64870  
D 20.08950 12.97300 15.32390  
D 20.16950 11.65300 13.46620  
D 10.98830 7.89000 11.69350  
D 10.93950 9.25200 9.88130  
D 15.41230 16.85250 10.06630  
D 10.95630 14.90650 18.97190  
D 11.47680 10.30600 18.40830  
D 10.04730 9.96180 16.69200  
H 8.15480 15.79900 13.03900  
H 11.33030 19.80850 13.64840  
H 12.41180 18.07900 17.07420  
H 11.61200 12.76520 18.54320  
H 8.33950 13.79580 11.13400  
H 8.20600 13.49250 15.27270  
H 9.80230 13.16120 9.25310  
H 11.27880 15.84650 9.38860  
H 15.52170 14.81330 18.37160  
H 12.26300 19.42300 14.96530  
H 14.78030 19.49950 11.87990  
H 13.20380 19.50700 14.68690  
H 10.06450 10.17350 12.06430  
H 11.23700 12.66550 7.76670  
H 13.61900 10.48780 9.34180  
H 11.27300 8.88800 14.06190  
H 14.08100 17.14350 7.79790  
H 13.91650 17.06950 18.42460  
H 13.98280 10.51980 17.60540  
H 15.30350 19.19350 13.90580  
H 15.52080 15.11300 18.52630  
H 15.79280 18.02800 9.37040  
H 15.48800 18.15400 16.96710  
H 11.17100 12.50700 16.39350  
H 12.88800 8.14850 13.63100  
H 16.88580 11.28850 9.15380  
H 15.39350 9.91300 10.49670  
H 16.85200 11.01100 16.99100  
H 18.39070 14.80430 15.55800  
H 18.31480 15.17080 11.18520  
H 18.03500 13.28450 17.01230  
H 18.36350 13.50180 13.47790  
H 18.34200 9.94050 12.99580  
H 18.43180 11.59350 11.37010  
H 18.16850 11.47600 14.96350  
H 15.91350 5.64100 16.45590  
H 16.32280 6.57450 17.90750  
H 17.48530 6.52250 16.55650  
H 16.63300 18.59730 15.37610  
H 20.18920 18.35650 13.70750  
H 19.16150 19.31850 12.58660  
H 19.87380 17.79080 12.03570  
H 9.54450 14.96250 15.74740  
H 14.79830 8.53630 5.56040  
H 13.99280 9.78830 4.58200  
H 12.99730 8.64550 5.50500  
H 13.68930 18.35570 16.13590  
H 9.82520 16.74950 6.96980  
H 7.30050 18.24350 15.70300  
H 7.43930 19.89800 15.09430  
H 9.61630 13.27330 17.04040  
H 21.60980 13.57000 8.39070  
H 20.91580 14.70580 7.23270  
H 20.79480 12.96030 6.96980  
H 5.31780 10.74850 14.24120  
H 5.50480 10.06800 12.61260  
H 12.61980 14.84380 7.73470  
H 14.63580 13.37880 22.10260  
H 16.22900 12.60130 21.78900  
H 14.76650 11.60850 21.07800  
H 18.26600 18.08180 9.19150  
H 22.60250 11.40680 13.90120

H 22.43220 11.81250 15.64600  
H 22.66680 13.10750 14.46200  
H 17.11100 15.93800 9.29320  
H 10.47430 7.15450 8.54880  
H 9.16570 6.92800 9.73470  
H 10.68080 6.02600 9.94240  
H 15.20450 8.20650 12.70830  
H 8.64670 15.81930 20.81140  
H 9.02130 17.51900 20.36010  
H 10.07000 16.66530 21.50040  
H 16.11970 12.94450 7.54780  
H 8.78300 8.45100 18.27960  
H 8.91980 9.79600 19.44590  
H 10.08830 8.45850 19.53120  
H 16.98050 16.22370 17.07680

204

./Thermo\_CH3COOH\_12-H\_1.2.xyz

Ru 15.32534545065132 13.53946926390995 15.18989899153132  
Ru 15.1204317789599 13.6327280264524 10.85133061491572  
Ru 15.39767241579120 12.85065552971448 13.86230691236997  
Ru 13.67546385871392 15.76529899691744 15.37245136831444  
Ru 13.44622548738665 15.90835423242838 11.03499002867352  
Ru 12.51674485583903 13.19766037616104 15.32558268527647  
Ru 13.75867479966299 14.21370259891320 13.14068049332321  
Ru 12.33647181077539 13.34671963628668 10.97823346724138  
Ru 12.5438258220546 11.72161281437390 13.84161768057426  
Ru 12.12701083673609 16.39039465912678 13.29454067502484  
Ru 11.11935613378780 13.91634474482260 13.23210568487712  
Ru 8.07554328863754 13.60997933893883 12.97776204883172  
Ru 9.29165043926983 15.78514275485775 13.62237371589229  
Ru 9.83153684982955 11.38662968148639 13.19440187086384  
Ru 10.524442080761532 18.33437757749548 13.40291791828307  
Ru 10.86113355570326 14.08444582050176 8.95392504539055  
Ru 9.77654355854491 13.03867666498796 11.15655042489882  
Ru 9.88088779507500 13.10342564531758 15.3844242972003  
Ru 11.22028616955959 13.77510483388666 17.61574779745450  
Ru 12.01864632852856 16.49953182593325 8.92508574387653  
Ru 10.71326789761435 15.55186257636635 11.12724118935962  
Ru 11.05809920289450 15.46476292292283 15.48824884326613  
Ru 12.41460438881956 16.18492964254207 17.67447371313464  
Ru 11.83096340874749 18.01135203619876 11.22979636310123  
Ru 13.08551760647556 18.83524011285560 13.37156280620429  
Ru 12.00364836808955 17.95830426143797 15.601363879893  
Ru 11.522165179674009 9.2777479285034 13.20800971062466  
Ru 12.37351053573675 12.81325648761820 8.7321554513126  
Ru 11.29390090644207 10.83847588281718 10.97886301895843  
Ru 11.40570033720223 10.8550344785039 15.20016264625277  
Ru 12.69596363229959 11.60516078561740 17.39399712290975  
Ru 13.51160397206984 14.34548593161325 8.90549138002250  
Ru 13.91543830920357 14.02543353557379 17.37835393244474  
Ru 14.50643668771159 15.75406962455007150 8.914816155907150  
Ru 14.81447646631279 16.65445482427685 13.20764473778764  
Ru 14.99088033821388 16.48633423910009 17.40163646216625  
Ru 14.54195080383550 18.22393898018459 11.14501351123282  
Ru 14.77974072488799 18.18630969976616 15.37079682082634  
Ru 14.20604378779784 9.55926518908780 13.09563456291422  
Ru 15.921185080793083 8.2084213136892 15.37654090130157  
Ru 15.08778120984135 12.25406298933732 8.61063101958304  
Ru 13.97411590434482 11.20990515626251 10.91025607285216  
Ru 14.18992862116612 11.09558635239860 15.26547045613247  
Ru 15.42146600923426 11.96398741229847 17.39707782914729  
Ru 16.13941062807901 14.57785730205122 8.73700094977921  
Ru 16.39491936492835 14.52809991843052 13.01363445048120  
Ru 16.48125484117700 14.35817652610665 17.25667197828335  
Ru 16.09461838696987 16.15394436859895 10.96108430182604  
Ru 16.42096961467762 16.06006256750161 15.17726082801447  
Ru 16.85274613131454 9.93454391994655 12.78990795824035  
Ru 16.64684959976431 11.46782631819611 10.75866769604871  
Ru 18.09235825465261 12.3715770103969 12.87173936047900  
Ru 16.87363101354820 11.25484879301240 15.1856253581986  
Ru 17.66776041163665 14.06604901816543 10.76826421522447  
Ru 17.98698923079165 13.85392305175260 15.14559029001885  
C 12.75084858868671 7.69946937742738 19.57016922252406  
C 12.77752189359970 8.63986830814728 18.39394853581998  
C 13.92618634253367 8.86384252820500 6.07140616640373  
C 13.822600050090973 10.00946947870103 7.0444413747040999  
C 8.6765947033928 20.83557683750082 16.50659019632344  
C 9.66219114692778 19.84913328361883 15.8019946420014  
C 18.71746811493626 19.74600372025475 14.32334466462172  
C 17.59638690033401 18.80623783728761 14.67622503753464  
C 20.25668310694845 15.5579626554193 7.52329520506510  
C 19.05968071981620 15.0567260919047 8.2979519553438  
C 7.29772916474894 16.60602094910981 8.52212422202844  
C 8.5553250282505 15.94335863918319 9.01829639740568  
C 5.60776778277186 10.09366560553307 13.85167235947901  
C 6.78444434066628 10.96812098975905 13.49263023259174  
C 15.87581435781820 9.48677780251386 20.89663355809596  
C 15.46075500280694 10.6901573343701 20.08152481274135  
C 22.18234136277989 12.715058383894668 14.4925287809246  
C 20.6985865408032 12.87730739693579 14.32794557884983  
C 9.25002537434344 7.0145686868312 10.23567980513172  
C 10.0916175772468 8.08567586173282 10.87686706631959  
C 9.67819832631455 15.9865526821553 21.12413768642403  
C 10.39874630667300 15.6432054177776 19.04471899396559  
C 19.19380346609137 7.48920872261172 15.5798060978559  
C 18.28319133986122 8.5498808678877 15.01124907881026

O 10.77551651603123 19.55027959777391 16.34644078603251
O 9.23098906766860 19.35903148846493 14.69378333993509
O 14.92535079517129 10.54020570005555 7.43426192965942
O 12.66040220036295 10.38969380048202 7.40298593508450
O 12.66522593808227 8.08146432078795 17.23040773902419
O 12.88701165176185 9.88155707064447 18.61156629946816
O 17.063312945419 17.55313425793668 14.62570694730808
O 16.466606779356202 19.31847061731062 14.98218151278236
O 17.9135548511672 15.15620376387809 7.73704115890374
O 19.25190513644475 14.57568325357598 9.46352977017370
O 9.0004708979632 16.32053387325550 10.15664605970965
O 9.11839462827898 15.07706512526105 8.27083429760453
O 7.90535407445645 10.39580514619045 13.30035501301424
O 6.55964601832618 12.23204621363722 13.43125630196696
O 14.96339384035850 11.70370459577920 20.58975779637665
O 15.73806393775545 10.54925273648286 18.785204248461026
O 20.13785134154768 12.18446773854423 13.40450494264362
O 20.09934571905991 13.70187171074338 15.10157464276615
O 10.41175687987899 7.92725995293234 12.10530100876117
O 10.42696585906208 9.09208753888973 10.17257026273510
O 11.16440878625662 16.54346218461566 19.34833493930658
O 10.28889560482203 14.47445893776541 19.36004073269382
O 17.93452196584597 8.41836213648555 13.78584024696422
O 17.93054263475775 9.50173496940091 15.78723058762782
H 11.2243605929532 14.24300763895944 12.08559059267671
H 11.75091727781701 7.90307975319365 14.38835238625047
H 7.62236221910188 15.28026539129788 13.59458931216966
H 9.00883105159715 17.27531030476001 12.88136658300746
H 7.92932115037492 13.00419776303687 11.4184727752068
H 9.64360193851949 13.18163718989083 17.17151321379922
H 8.1580969264882 17.03913826297689 7.99197085263769
H 9.12431737394009 14.78793845694976 11.99581628091261
H 9.54619121448323 13.02741242415092 9.40007142407680
H 10.64805331628646 15.53815611209624 17.19365742670669
H 11.27691981736355 17.98714037580684 9.49922101377409
H 12.40510814644051 19.60859343012816 12.02968196054775
H 12.29304266591918 17.88088870186337 17.36156297558120
H 11.17034308070196 12.68263761005484 7.703161409418937
H 9.54556326900901 11.14508002543331 11.40283247728251
H 10.92136683201504 11.26577515423950 9.21589686007207
H 10.16007169847383 9.72094812647870 14.21780155015471
H 11.31715877859059 10.65951383406454 16.98705042998219
H 11.95513726648664 15.12556875154925 7.80349956489602
H 12.62644099419521 14.57906423512441 18.57321130939084
H 13.16671207494243 17.50966554732155 8.01850150830961
H 13.77204238523715 17.06218463483691 18.52682509518564
H 14.50286967657610 19.41838243311806 12.53883068976182
H 15.03116624738014 18.40935097864355 9.46492422815601
H 16.2454003477639 17.8894197564659 11.54778677418095
H 14.11854419666522 19.621236857859309 14.57064876243
H 17.87684647163238 10.29374765273568 10.0662803824729
H 12.96602379384979 8.53049352181094 12.41598804725581
H 14.38387106855678 9.58799636797583 16.11464241023675
H 14.01275245093382 12.47285286736154 18.45525326934895
H 14.73610667113805 15.4003509954470 7.73842726422635
H 16.74598203356105 12.95825570611365 18.25852111932458
H 17.7796406912224 15.6866578092324 11.52113403205424
H 13.4323982822497 6.85893149513906 19.38728615435620
H 15.68024506702271 8.68449647353082 12.47170664521475
H 16.66641210008601 11.48412019202788 8.97802084184571
H 15.35802308728078 10.39822551725290 10.16154477864264
H 18.23939792394959 10.94765421362604 11.82662643838134
H 17.00045827451227 11.41290346815209 16.91669770693932
H 18.03408001659722 10.89129094365779 13.90885458201476
H 17.82275347842653 12.49765142125497 9.92975894746007
H 18.94229921144402 13.04147265424262 11.55716098389266
H 18.28263292481156 14.11920942649412 13.41741646143642
H 18.2038461722141 12.15453744234903 15.78411095541170
H 8.69797195286355 12.4179483424859 14.3000559474703
H 11.599092081567227 19.65671305645604 13.88729968040759
H 11.26985910815301 12.25524738350427 18.40960241898643
H 15.23448727604134 14.97989765926070 18.46377982751864
H 13.96787826689756 8.15974500936947 14.16142793192849
H 16.25650925981145 13.19786799221758 7.63689728792519
H 16.40101410738159 16.54511831868317 9.24673176248562
H 16.807598909642 16.2289903814154 17.0244118851971
H 18.21364015853009 14.02762548018413 16.8769157210380
H 11.73773650260099 7.28365130076817 19.66986089733211
H 13.02106128000440 8.22316165758513 20.49163009982967
H 15.21792586219560 18.19222582632524 17.16589462703098
H 8.6275623467022 16.80472249609049 14.68931264085224
H 12.97424606723783 8.32760164806312 6.0073516244562
H 14.73473251752787 8.18662309036564 6.37161946862035
H 14.17948431170140 9.26422586216831 5.07878188171752
H 13.35302742704353 18.1838181596903 16.26584547279689
H 7.88779438397137 20.30180011469724 16.89310663363909
H 8.40736213657798 21.58846712534468 15.7943842634323
H 9.29520335906642 21.31228728431945 17.3302167941800
H 9.2820284228709 14.83604808742150 15.30990248531309
H 18.71949952329211 19.88763100483569 13.2320830157209
H 19.68238159074421 19.31565440995464 14.61261559900531
H 18.56434625815203 20.72123287773865 14.7976279288016
H 10.47412071733331 17.09876220166790 15.7966966251586
H 21.1782323304070 15.118604757395408 13.8059070
H 20.31132943689882 16.65115168575564 7.64271858287745
H 20.14497114846226 15.33452249249583 6.46517069552386

H 10.24584637028152 18.61023658038568 11.54200661086313
H 6.82751044283611 16.0021550303697 7.73936118303097
H 7.56669082455387 17.58601695849389 8.10017949901281
H 6.6040664746942 16.7766632476196 9.35381222898043
H 18.33758111580643 15.46088883845130 15.18749068778325
H 4.66636625102275 10.57220594526401 13.56262012408186
H 5.6045308261870 14.62570694730808 19.94021462589369
H 5.70819633246802 9.10941929194885 13.38118956186633
H 15.66855189334933 10.02699824754187 14.28576200800999
H 15.83121516875583 8.56426661895845 20.30604290708163
H 15.24372697330774 9.41199681061395 21.78894233217966
H 16.91608331842675 9.62510141394242 21.22591683793677
H 16.86681556786982 13.30035501301424 9.65809506155736
H 22.52707669166496 13.21631281387387 15.40242118587916
H 22.68629237262078 13.15456292823211 13.6198589861623
H 22.44045851450659 11.64947209729761 14.51991323811819
H 14.22265177660141 9.53942184863460 11.31706061332651
H 9.34799315513590 7.05200573451185 9.14591300316581
H 8.10697752340001 7.19251033241740 10.49994004962636
H 9.53136157342354 6.02724608778586 10.61983011645733
H 13.63362805663917 12.84420832130494 7.67130438740729
H 8.73556621103326 15.4329803527763 21.19317376429255
H 9.50534511956755 17.06624975770847 21.18805812798218
H 10.31385220218924 15.68943822955357 21.97161707501174
H 13.004126327308984 18.43340605957278 10.3137609203908
H 19.44139516946044 7.70884659460696 16.6226004920491
H 20.11093686912534 7.44557609386877 14.97654027816900
H 18.70863254040205 6.50683940505195 15.5070154133551
H 9.84539845058172 11.43953596321249 15.85650070354977
221
./Thermo\_CH3COOH\_H2\_H\_1\_6.xyz
H 15.74930 13.01900 15.07250
Ru 15.29950 13.34830 10.75000
Ru 15.44300 11.62780 12.82940
Ru 14.38200 15.39600 15.43800
Ru 13.88030 15.77950 11.00870
Ru 12.85080 13.05370 15.40400
Ru 14.13350 13.94700 13.13900
Ru 12.42680 13.42050 11.04190
Ru 12.62600 11.65850 13.04340
Ru 12.76700 16.36320 13.49240
Ru 11.25550 14.05230 13.46930
Ru 8.51800 13.98300 13.60900
Ru 10.02500 16.50900 13.58920
Ru 10.80530 11.75800 13.32990
Ru 11.57880 18.57400 13.87070
Ru 11.00080 14.40800 9.07560
Ru 9.82950 13.52530 11.32510
Ru 10.23700 13.09800 15.70630
Ru 11.90800 13.65030 17.81340
Ru 10.45350 16.60360 9.17310
Ru 11.21200 15.78330 11.38280
Ru 11.64200 15.44630 15.71310
Ru 13.36930 15.94330 17.88880
Ru 12.65700 18.09250 11.52110
Ru 14.20080 18.75300 13.59770
Ru 15.71980 14.37300 8.94060
Ru 11.28830 9.08900 13.25560
Ru 12.29680 12.16350 8.69130
Ru 11.14500 11.04230 10.91840
Ru 11.56200 10.78830 15.26620
Ru 13.11350 11.30650 17.36700
Ru 15.88130 17.68130 15.48510
Ru 14.55650 13.56350 17.37660
Ru 15.01480 16.62580 8.93670
Ru 15.41600 16.29280 13.18880
Ru 15.88980 15.87500 17.43250
Ru 15.39080 18.04680 11.20570
Ru 15.88130 17.68130 15.48510
Ru 14.14150 9.26900 12.95040
Ru 12.91480 8.62100 15.28640
Ru 14.96400 12.12030 8.38190
Ru 13.82330 11.06800 10.73880
Ru 14.19280 10.80650 15.01210
Ru 15.92250 11.23630 17.25180
Ru 16.21720 14.20950 8.53890
Ru 16.76880 13.91780 12.85540
Ru 17.16280 13.63550 17.08330
Ru 16.61180 15.69180 10.88070
Ru 17.08430 15.37780 15.14920
Ru 16.58850 9.38530 12.47870
Ru 16.48000 10.98950 10.47730
Ru 18.26920 11.47870 12.46440
Ru 17.03830 10.66430 14.75060
Ru 17.89780 13.37780 10.52380
Ru 18.41430 13.02980 14.85850
C 13.34220 7.32250 19.40510
C 13.28450 8.33620 18.29130
C 20.16200 18.60250 15.39590
C 8.12850 17.89700 15.32050
C 13.24580 9.37330 5.38200
C 13.36900 10.38100 6.49870
C 7.84930 19.57570 15.95750
C 11.80590 15.98070 15.19080
C 20.52480 14.50180 7.16870
C 19.31120 14.23420 8.02670

C 7.36850 16.09520 6.81170  
C 8.24850 15.45280 7.84060  
C 5.75980 10.53530 13.85150  
C 7.08150 11.38550 13.71730  
C 16.22080 11.43480 21.65590  
C 15.88680 11.80950 20.22100  
C 12.89330 14.27900 14.05120  
C 21.35780 14.10830 14.50460  
C 8.87930 7.31700 9.96680  
C 9.72600 8.30180 10.74270  
C 10.68050 15.94530 21.36910  
C 11.35230 15.55980 20.87750  
C 7.39180 10.35280 17.76090  
C 8.57550 10.86370 16.96010  
O 10.07230 19.32900 15.13980  
O 8.57030 17.68300 14.69310  
O 14.55780 10.71230 6.84680  
O 12.28830 10.81830 7.82830  
O 18.83230 16.65600 15.01810  
O 17.79530 18.58450 15.62110  
O 13.84880 9.54680 18.59180  
O 13.49480 7.87780 17.10070  
O 18.19050 14.68080 7.59540  
O 19.49750 13.59650 9.11920  
O 9.46200 15.26100 7.63870  
O 7.62230 15.14500 8.97050  
O 8.05180 10.81280 13.26940  
O 6.92580 12.60520 14.06940  
O 15.29830 12.89600 20.00540  
O 16.24280 10.92180 19.33830  
O 20.61800 13.35530 15.16618  
O 20.96130 14.78550 13.43810  
O 9.84530 9.46850 10.24400  
O 10.26050 7.86130 11.82140  
O 10.98300 14.45800 19.53200  
O 12.26630 16.33800 19.63680  
D 8.59500 12.14250 16.77550  
D 9.43800 10.83100 16.55760  
H 7.20700 14.84680 13.31640  
H 13.94550 20.31380 12.93970  
H 9.84620 8.72550 14.10500  
H 16.24900 19.37250 10.90000  
H 8.58230 15.56650 13.89830  
H 8.16150 13.66250 12.93770  
H 18.17690 18.19130 12.98960  
H 9.45530 15.15930 11.10070  
H 9.60900 13.42680 9.56700  
H 8.58050 14.26720 15.44300  
H 9.15730 16.89880 12.28990  
H 11.55100 15.57880 17.43146  
H 17.09120 17.68900 17.58020  
H 11.06550 17.64780 11.22390  
H 12.41000 18.34500 9.77440  
H 11.77980 19.48700 12.45320  
H 12.92600 19.33950 14.85980  
H 9.66130 9.52130 13.71218  
H 11.71200 9.68350 11.69580  
H 10.79450 11.60550 9.20840  
H 12.11850 12.17200 18.67610  
H 11.50150 10.93350 17.12620  
H 13.68530 17.49870 8.16170  
H 14.80150 16.54980 18.70990  
H 15.47480 18.30070 9.49940  
H 14.41050 20.45230 13.71530  
H 16.18300 17.60480 17.23540  
H 13.57130 12.98750 7.60890  
H 13.88150 9.39720 11.21380  
H 15.10800 10.05330 10.82430  
H 15.97430 9.64730 17.44420  
H 16.80350 16.11830 9.15900  
H 15.99930 12.99350 7.28860  
H 17.48750 12.03530 17.68620  
H 15.69680 19.03580 12.57620  
H 15.41880 8.08900 12.44050  
H 16.40070 11.07600 8.69080  
H 16.16730 9.18450 10.72630  
H 18.45950 9.88100 12.06710  
H 17.18830 10.25730 16.54610  
H 17.17680 9.00280 14.25370  
H 17.19430 12.87600 8.98330  
H 18.27300 11.53600 10.58770  
H 19.79200 11.06100 12.22420  
H 18.75580 13.14180 16.60310  
H 18.29100 14.50880 13.87150  
H 19.35000 12.34350 13.44490  
H 18.55280 11.41330 15.48850  
H 9.54130 11.71100 11.50600  
H 9.76500 11.46750 14.98770  
H 10.53480 12.84100 17.48270  
H 10.72380 16.22900 9.68660  
H 12.24730 15.27730 7.99860  
H 13.40280 14.24650 18.72830  
H 14.04050 19.10620 10.88590  
H 11.04600 13.62450 7.87640  
H 12.35950 10.88350 10.18760  
H 11.46380 8.91650 10.01130

H 14.99630 15.35480 7.68400  
H 15.58170 19.20750 14.57460  
H 16.07470 14.34750 18.37890  
H 17.03980 17.50550 11.10750  
H 12.70850 8.39630 12.49200  
H 14.56880 10.19550 16.74320  
H 11.65870 7.72520 14.19180  
H 14.50850 11.98880 18.28270  
H 17.65080 15.41330 16.95490  
H 18.27850 15.11250 10.77650  
H 17.16300 15.83850 12.53670  
H 19.98530 14.63400 13.32240  
H 12.57200 6.55650 19.24050  
H 13.19130 7.80450 20.37540  
H 14.31700 6.81600 19.38430  
H 16.60600 17.36880 13.92900  
H 20.02850 19.68780 15.31090  
H 20.79430 18.25350 14.53370  
H 20.06630 18.34950 16.30300  
H 7.87420 14.78900 15.02440  
H 12.26050 9.44400 4.90960  
H 13.35970 8.36450 5.80580  
H 14.04430 9.52100 4.64620  
H 14.63400 18.55650 16.44210  
H 6.85100 19.17800 15.74920  
H 7.90500 20.64030 15.69830  
H 8.05400 19.48730 17.03440  
H 10.14330 14.68130 16.44630  
H 21.32550 13.79280 7.40530  
H 20.88400 15.51950 7.37830  
H 20.25900 14.45000 6.10690  
H 19.83620 13.05370 11.77510  
H 7.44300 17.18730 6.92610  
H 6.32170 15.80550 6.95270  
H 7.71950 15.83450 5.80790  
H 14.37000 8.10200 14.24930  
H 4.87450 11.16080 14.00260  
H 5.87850 9.86230 14.71310  
H 5.63980 9.90900 12.95920  
H 11.54000 17.17800 16.07840  
H 16.93480 10.60600 21.69960  
H 15.29030 11.13900 22.16140  
H 16.61650 12.31480 22.17750  
H 18.63680 10.49100 13.79530  
H 23.41600 13.69530 14.14890  
H 22.98780 13.92200 15.86830  
H 23.09350 15.33180 14.74800  
H 15.68750 9.70130 15.06360  
H 8.38430 6.61650 10.64830  
H 9.53580 6.73850 9.30050  
H 8.14550 7.84800 9.35120  
H 10.11350 16.05180 15.34680  
H 10.78180 17.02080 21.54700  
H 11.17050 15.40620 22.19360  
H 9.62570 15.64800 21.35250  
H 13.64900 10.89200 9.00410  
H 7.25050 9.27950 17.59320  
H 6.48430 10.91330 17.50660  
H 7.59750 10.51650 18.82870  
H 8.27430 14.73150 9.61530  
151  
./Thermo\_CH3COOH\_12.xyz  
Ru 15.25530 13.55430 15.43930  
Ru 15.44150 13.47430 11.08590  
Ru 15.40750 11.98020 13.32320  
Ru 13.82650 15.70100 15.40210  
Ru 13.84050 15.73230 11.02040  
Ru 12.55000 13.27680 15.35870  
Ru 14.02100 14.22000 13.23220  
Ru 12.70300 13.35950 11.09500  
Ru 12.65970 11.72550 13.20280  
Ru 12.49950 16.45380 13.24440  
Ru 11.31780 14.02080 13.13880  
Ru 8.71550 13.93580 13.05020  
Ru 9.84900 16.16120 13.22070  
Ru 9.95380 11.58650 13.27650  
Ru 10.96200 18.48550 13.11700  
Ru 11.33150 13.90620 9.00250  
Ru 10.12750 13.11150 11.11890  
Ru 9.92620 13.21750 15.16970  
Ru 11.07530 13.99730 17.32150  
Ru 12.60480 16.43120 8.96450  
Ru 11.16750 15.55100 11.06380  
Ru 11.12350 15.50430 15.24690  
Ru 12.33550 16.41750 17.47620  
Ru 12.44630 17.88530 11.15920  
Ru 13.69430 18.82680 13.25950  
Ru 12.28600 17.93000 15.30260  
Ru 11.53480 9.43000 13.25000  
Ru 12.83830 11.84800 8.98920  
Ru 11.46680 11.03880 11.05650  
Ru 11.40130 10.93630 15.28540  
Ru 12.67750 11.75080 17.41250  
Ru 13.99580 14.14080 8.98330  
Ru 13.77100 14.10920 17.50290  
Ru 15.15480 16.45100 9.01470

Ru 15.19200 16.66700 13.27920  
Ru 14.91780 16.49650 17.52370  
Ru 14.99300 18.05230 11.16360  
Ru 14.74750 18.02450 15.42810  
Ru 14.28730 9.64680 13.19840  
Ru 12.94930 8.79350 15.08000  
Ru 15.42130 11.84450 9.09010  
Ru 14.13580 11.15750 11.10250  
Ru 14.01250 11.03780 15.35610  
Ru 15.19580 11.94230 17.42650  
Ru 16.53030 14.47150 9.01420  
Ru 16.71450 14.28100 13.32500  
Ru 16.34930 14.45930 17.51540  
Ru 16.51850 15.80450 11.14390  
Ru 16.45050 15.88050 15.50610  
Ru 16.76030 9.78500 13.43370  
Ru 16.75050 11.22730 11.25830  
Ru 18.07230 12.04200 13.38060  
Ru 16.08220 11.52700 15.38600  
Ru 17.96830 13.67570 11.17920  
Ru 17.85830 13.50250 15.56590  
C 5.58680 10.91700 13.06860  
C 6.92680 11.60530 13.06730  
C 14.56180 12.71550 21.67620  
C 14.57950 12.87270 20.17780  
C 20.49700 13.65430 7.51590  
C 19.31650 13.72580 8.44840  
C 7.81400 16.39050 8.26620  
C 9.06830 15.80930 8.86440  
C 9.88150 21.51350 16.08000  
C 10.48980 20.31500 15.40270  
C 19.36230 18.47530 13.55510  
C 18.07430 17.77330 13.89950  
C 16.31930 6.01350 14.94970  
C 15.31100 7.06830 14.59590  
C 14.21180 9.86550 5.37000  
C 14.17650 10.57250 6.69730  
C 22.09300 12.62000 14.95290  
C 20.60700 12.71250 14.73110  
C 9.51750 7.24400 10.06670  
C 10.28700 8.31750 10.78580  
C 9.48450 9.20630 18.89420  
C 10.35600 9.99550 17.95460  
C 10.25420 15.70900 21.26900  
C 10.79680 15.49650 19.87990  
O 6.92200 12.89230 13.05280  
O 7.97850 10.87780 13.07830  
O 13.88700 13.80780 19.66170  
O 15.28950 12.02450 19.59910  
O 18.18350 14.06100 7.91540  
O 19.48300 13.47430 9.67900  
O 9.44600 16.26050 9.99860  
O 9.67600 14.88750 8.21240  
O 11.25630 19.56180 16.10670  
O 10.23030 20.11880 14.16820  
O 17.10920 17.84150 13.05850  
O 18.02000 17.11700 14.99240  
O 14.21450 7.12050 15.23890  
O 15.60600 7.89480 13.63670  
O 15.28850 10.89200 7.23740  
O 13.02800 10.79600 7.23370  
O 19.93130 13.44280 15.54020  
O 20.09400 12.04300 13.76860  
O 10.54680 8.12900 12.03050  
O 10.62800 9.36380 10.13920  
O 10.09580 9.98350 16.71200  
O 11.35530 10.62780 18.47690  
O 10.52520 14.38930 19.30320  
O 11.46800 16.45780 19.35620  
H 5.78580 9.83050 13.11800  
H 5.03330 11.19130 12.15940  
H 4.99620 11.26930 13.92560  
H 15.50850 12.29120 22.02930  
H 13.75530 12.01630 21.94430  
H 14.35930 13.67650 22.16110  
H 21.23450 13.13900 7.99110  
H 20.80630 14.67680 7.25270  
H 20.21400 13.14600 6.58710  
H 7.72000 16.10680 7.21320  
H 7.81950 17.48230 8.37330  
H 6.94400 16.00930 8.62050  
H 8.94200 21.79450 15.59060  
H 10.58070 22.35900 15.99780  
H 9.72130 21.30930 17.14410  
H 19.98600 18.59200 14.44820  
H 19.15580 19.44880 13.09520  
H 19.90630 17.86500 12.81880  
H 16.05400 5.67150 14.05610  
H 15.83380 5.17480 15.45930  
H 17.05830 6.45500 15.63640  
H 13.22100 9.86180 4.90490  
H 14.53650 8.82680 5.52990  
H 14.94750 10.34180 4.71040  
H 10.23500 15.44150 11.20110  
H 10.67270 10.65000 9.55450  
H 13.86280 17.26450 7.99270

H 10.59120 15.75400 17.01520  
H 11.95630 18.02350 9.41560  
H 13.65130 17.40350 18.33880  
H 9.52750 13.20800 16.95670  
H 18.51250 11.86150 11.54110  
H 22.58650 12.16070 14.09120  
H 22.28350 12.00930 15.84750  
H 22.50480 13.61900 15.14600  
H 18.08480 14.04330 17.28450  
H 9.55470 7.40100 8.98430  
H 8.46930 7.27800 10.39900  
H 9.91300 6.25450 10.32800  
H 9.27500 17.87130 13.00600  
H 9.35900 9.74280 19.84220  
H 9.97900 8.24780 19.11490  
H 8.51350 8.99980 18.43300  
H 12.68380 14.87030 7.87590  
H 10.76400 16.54320 21.76250  
H 10.35650 14.79000 21.85820  
H 9.18100 15.94030 21.19830  
H 14.64250 19.63450 11.96600  
167  
./Thermo\_CH3COOH\_14-Domain3.xyz  
Ru 14.93450 13.04750 15.47210  
Ru 15.19730 13.02650 11.15530  
Ru 15.16080 11.40980 13.38270  
Ru 13.49350 15.22380 15.42760  
Ru 13.60880 15.28300 11.06950  
Ru 12.26150 12.77550 15.38060  
Ru 13.71930 13.71480 13.24800  
Ru 12.40980 12.90700 11.06270  
Ru 12.37200 11.26980 13.21140  
Ru 12.22380 15.92300 13.25170  
Ru 11.06200 13.53380 13.15260  
Ru 8.40400 13.33480 13.05280  
Ru 9.46450 15.54030 13.26990  
Ru 9.75130 10.99550 13.17860  
Ru 10.55780 17.86900 13.00840  
Ru 11.10880 13.54030 8.95230  
Ru 9.80600 12.62500 11.13320  
Ru 9.65050 12.62780 15.13250  
Ru 10.76480 13.44630 17.31810  
Ru 12.36700 15.98130 9.02930  
Ru 10.80800 15.06730 11.00350  
Ru 10.80430 14.95500 15.25520  
Ru 11.97500 15.90350 17.48140  
Ru 12.14380 17.42500 11.18940  
Ru 13.39880 18.28380 13.41860  
Ru 11.86430 17.38330 15.32860  
Ru 11.37300 8.91650 13.16510  
Ru 12.60630 11.37030 9.00670  
Ru 11.20950 10.53630 11.03910  
Ru 11.16480 10.33030 15.28490  
Ru 12.38150 11.23280 17.41640  
Ru 13.77150 13.73350 9.02620  
Ru 13.46030 13.06400 17.51670  
Ru 14.94600 16.10200 9.05870  
Ru 14.82000 16.16630 13.29250  
Ru 14.59650 16.04530 17.57940  
Ru 14.56930 17.75330 11.19740  
Ru 14.43200 17.61830 15.46510  
Ru 14.02530 9.21230 13.13600  
Ru 12.99000 8.20650 15.08340  
Ru 15.15530 11.42880 9.14630  
Ru 13.85330 10.71120 11.12640  
Ru 13.73230 10.54330 15.36260  
Ru 14.88030 11.47530 17.48660  
Ru 16.28180 14.11530 9.14710  
Ru 16.45250 13.75780 13.37180  
Ru 16.02900 14.00030 17.50970  
Ru 16.34780 15.36630 11.29750  
Ru 16.16100 15.36850 15.47990  
Ru 16.45250 9.22630 13.65130  
Ru 16.45450 10.71650 11.36380  
Ru 17.77620 11.49380 13.90080  
Ru 16.30250 10.85650 15.49760  
Ru 17.71550 13.17300 11.21410  
Ru 17.56680 13.04650 15.59380  
C 5.36100 10.25420 13.20120  
C 6.68430 10.97430 13.16280  
C 14.26380 12.32180 21.71550  
C 14.27330 12.46050 20.21550  
C 20.14850 13.03820 7.50960  
C 19.00800 13.17150 8.48350  
C 7.64030 16.11180 8.24900  
C 8.86800 15.48750 8.89550  
C 9.63950 21.10630 15.06810  
C 10.18130 19.83730 15.26770  
C 19.13330 17.78480 13.34550  
C 17.85100 17.07580 13.67290  
C 16.24430 5.23330 15.49550  
C 15.66000 6.54870 15.04670  
C 14.08430 9.69600 5.26660  
C 14.00000 10.30130 6.64070  
C 21.79930 12.12550 15.03160  
C 20.31250 12.19780 14.80960

C 9.32830 6.70000 10.02480  
C 10.11400 7.76500 10.74019  
C 9.00450 9.00300 18.94980  
C 9.97800 9.64150 17.99540  
C 9.99850 15.08550 21.31510  
C 10.59630 14.90030 19.90820  
C 17.20900 19.75450 8.40290  
C 16.36950 18.72180 8.99830  
C 16.88000 19.69320 18.42050  
C 16.08250 18.61400 17.73880  
D 6.63980 12.26400 13.16590  
O 7.75100 10.27550 13.12060  
O 13.55250 13.37500 19.69160  
O 15.01130 11.63350 19.55720  
O 17.89100 13.61880 8.00670  
O 19.18780 12.85150 9.69770  
O 9.14670 15.79250 10.06820  
D 9.55580 14.68300 8.13770  
D 10.09500 19.08000 16.01760  
D 9.92180 19.59350 14.03670  
O 16.96650 16.97730 12.74360  
O 17.68650 16.61480 14.84890  
O 14.46950 6.82830 15.42660  
D 16.41150 7.28580 14.31590  
D 15.09330 10.59300 7.23640  
D 12.83800 10.46800 7.10250  
O 19.63180 12.94600 15.60160  
O 19.80180 11.50100 13.86920  
O 10.47800 7.52330 11.94860  
D 10.35900 8.85580 10.12650  
O 9.75430 9.58230 16.74878  
D 11.01350 10.21230 18.51930  
O 10.21950 13.80780 19.31510  
O 11.16880 15.87230 19.39110  
O 15.88250 18.97000 10.15900  
O 16.13630 17.66000 8.33220  
D 15.86000 17.53400 18.37478  
D 15.05330 18.94830 16.54610  
H 5.50830 9.17250 13.26830  
H 4.78980 10.49550 12.29360  
H 4.77320 10.61020 14.05820  
H 15.23630 11.96430 22.07220  
H 13.50780 11.56930 21.98690  
H 13.99620 13.27000 22.19410  
H 20.98800 12.50930 7.97160  
H 20.47530 14.04000 7.19550  
H 19.81150 12.50780 6.60970  
H 7.61100 15.93330 7.16920  
H 7.62450 17.18800 8.46200  
H 6.74660 15.67830 8.71318  
H 8.74250 11.43380 15.33220  
H 10.40400 21.89330 15.77860  
H 9.42750 20.96280 16.93350  
H 19.74470 17.92030 14.24330  
H 18.91050 18.75450 12.88140  
H 19.08930 17.18630 12.60840  
H 16.64100 4.69100 14.62680  
H 15.49300 4.62600 16.00980  
H 17.08930 5.42480 16.17230  
H 13.12880 9.79620 4.74140  
H 14.32180 8.62600 5.36350  
H 14.89330 10.16530 4.69400  
H 18.05580 14.90600 10.94520  
H 16.15900 9.99200 9.76090  
H 13.57700 16.75330 8.00050  
H 10.25350 15.20450 17.02690  
H 11.53250 17.52580 9.52950  
H 13.23400 16.89250 18.32320  
H 9.28250 12.54700 15.92160  
H 18.22250 11.36800 11.61730  
H 22.29830 11.68000 14.16530  
H 21.99870 11.50580 15.91850  
H 22.19830 13.12700 15.23500  
H 17.75630 13.54500 17.33290  
H 9.36180 6.85630 8.94490  
H 8.28050 6.75930 19.35580  
H 9.70430 5.70450 10.28850  
H 8.90850 17.28900 12.96650  
H 8.77000 9.69830 19.76600  
H 9.46970 8.11230 19.39730  
H 8.99130 8.70730 18.42460  
H 12.42700 14.41580 7.90560  
H 10.54900 15.88180 21.82620  
H 10.07680 14.14220 21.86890  
H 8.93400 15.36050 21.27450  
H 14.29580 19.23800 12.21320  
H 17.49870 19.52830 7.35280  
H 18.23380 19.75830 8.96710  
H 16.84600 20.75330 8.50120  
H 11.25550 8.40350 14.99910  
H 17.14400 20.48800 17.71560  
H 17.78450 19.26080 18.86720  
H 16.28100 20.11880 19.23820  
H 9.82680 12.37800 9.33110

184  
./Thermo\_CH3COOH\_14-H\_0.4.xyz

Ru 15.04380 13.12050 15.47210  
Ru 15.15030 13.02070 11.09840  
Ru 15.08480 11.52250 13.34760  
Ru 13.68250 15.31350 15.46980  
Ru 13.65230 15.39680 11.10170  
Ru 12.36030 12.91700 15.43050  
Ru 13.75650 13.85050 13.25530  
Ru 12.37650 12.96200 11.16880  
Ru 12.38600 11.34680 13.24910  
Ru 12.32530 16.08550 13.29350  
Ru 11.04130 13.64230 13.25900  
Ru 8.43600 13.70780 13.24520  
Ru 9.66800 15.84170 13.37180  
Ru 9.66800 11.27930 13.32530  
Ru 10.75620 18.11850 13.21530  
Ru 11.03330 13.64030 9.06310  
Ru 9.67450 12.84930 11.24060  
Ru 9.71450 12.91150 15.32750  
Ru 10.92450 13.74130 17.49670  
Ru 12.32180 16.02100 9.02540  
Ru 10.91730 15.17530 11.19480  
Ru 10.96300 15.22630 15.33190  
Ru 12.21450 16.08650 17.50240  
Ru 12.12380 17.51280 11.20000  
Ru 13.44800 18.37030 13.23140  
Ru 12.18280 17.60800 15.39300  
Ru 11.16800 9.05300 13.31430  
Ru 12.49080 11.54150 8.98610  
Ru 11.08800 10.68730 11.18180  
Ru 10.99580 10.56030 15.45600  
Ru 12.27050 11.42580 17.52610  
Ru 13.69000 13.74400 9.03580  
Ru 13.62130 13.79580 17.54190  
Ru 14.96150 16.04720 9.00560  
Ru 14.96850 16.26220 13.31230  
Ru 14.82900 16.17500 17.61060  
Ru 14.89600 17.66250 11.11760  
Ru 14.64050 17.71500 15.51080  
Ru 13.96450 9.15530 13.27220  
Ru 12.63450 8.49080 15.33950  
Ru 15.11230 11.49300 8.96090  
Ru 13.77400 10.66230 11.08150  
Ru 13.77680 10.60280 15.43980  
Ru 14.99830 11.59250 17.55220  
Ru 16.31530 13.90420 9.02170  
Ru 16.39380 13.83880 13.28730  
Ru 16.27150 13.89400 17.53050  
Ru 16.29850 15.39180 11.10880  
Ru 16.28850 15.40950 15.40920  
Ru 16.39530 9.31700 13.39990  
Ru 16.43800 10.75180 11.17350  
Ru 17.73580 11.52350 13.25840  
Ru 16.43380 10.91600 15.42810  
Ru 17.72500 13.24600 11.18030  
Ru 17.71980 13.09950 15.48090  
C 5.22630 10.81670 13.42350  
C 6.58000 11.46090 13.41240  
C 13.87450 12.40430 21.73650  
C 14.05180 12.52230 20.24390  
C 20.56200 13.99130 7.92450  
C 19.28030 13.78500 8.68870  
C 7.54230 16.22300 8.52750  
C 8.81350 15.62600 9.05500  
C 10.03050 21.32950 16.10100  
C 10.52280 20.06050 15.46120  
C 19.05630 18.22200 13.55590  
C 17.83450 17.41480 13.90580  
C 16.01080 5.66850 15.18890  
C 14.98530 6.70120 14.81560  
C 13.61150 9.67230 5.22310  
C 13.67380 10.34550 6.56860  
C 21.65000 11.16380 15.19670  
C 20.24030 11.58630 14.87850  
C 8.54080 7.23630 10.26840  
C 9.46850 8.19550 10.97120  
C 10.28780 15.64370 21.39890  
C 10.70630 15.38800 19.97580  
C 10.40430 7.70930 18.90150  
C 10.95950 8.84430 18.08300  
C 15.42080 20.09150 7.45550  
C 15.22230 18.93500 8.39960  
C 17.18680 19.79120 18.40930  
C 16.30650 18.75300 17.76480  
D 6.61750 12.74770 13.55900  
D 7.60400 10.72050 13.23970  
D 13.67880 13.61150 19.68620  
D 14.54630 11.51530 19.62450  
D 18.10430 14.18000 8.14550  
D 19.34680 13.23000 9.83890  
D 9.22530 16.01900 10.20210  
D 9.41880 14.75530 8.33250  
D 11.27800 19.29850 16.16680  
D 10.17550 19.81330 14.25550  
D 16.81100 17.51000 13.14950  
D 17.88700 16.66130 14.94010  
D 13.96500 6.84530 15.55550



|   |          |          |          |
|---|----------|----------|----------|
| O | 15.19150 | 7.40230  | 13.73940 |
| O | 14.81850 | 10.66730 | 7.02440  |
| O | 12.56000 | 10.53300 | 7.18950  |
| O | 19.68800 | 12.43400 | 15.66710 |
| O | 19.67450 | 11.06250 | 13.85880 |
| O | 9.51400  | 7.85250  | 12.11550 |
| O | 9.75230  | 9.29420  | 10.38210 |
| O | 11.44050 | 16.27800 | 19.41320 |
| O | 10.32330 | 14.30230 | 19.42510 |
| O | 10.72850 | 8.81450  | 16.80820 |
| O | 11.59850 | 9.77250  | 18.66460 |
| O | 15.14830 | 19.18220 | 9.64650  |
| O | 15.12630 | 17.76130 | 7.87960  |
| O | 15.98830 | 17.72950 | 18.45010 |
| O | 15.94300 | 18.95550 | 16.54670 |
| H | 9.93350  | 17.54800 | 13.23090 |
| H | 12.26180 | 14.53980 | 7.94920  |
| H | 8.11080  | 13.52250 | 11.27360 |
| H | 9.57200  | 11.32230 | 16.17360 |
| H | 13.58000 | 18.97280 | 11.59210 |
| H | 14.66830 | 19.08250 | 14.34210 |
| H | 12.36830 | 9.59780  | 10.64100 |
| H | 10.83500 | 12.14880 | 18.24780 |
| H | 13.73500 | 10.23830 | 17.23880 |
| H | 16.35220 | 17.00350 | 10.25130 |
| H | 12.57680 | 8.23180  | 12.59520 |
| H | 16.39450 | 12.33830 | 8.10780  |
| H | 16.58130 | 10.53350 | 9.39430  |
| H | 16.51320 | 12.25650 | 18.21140 |
| H | 16.66080 | 15.65500 | 17.21510 |
| H | 18.11940 | 13.31730 | 13.74900 |
| H | 17.12720 | 9.22150  | 14.98380 |
| H | 5.30850  | 9.75400  | 13.67420 |
| H | 4.78500  | 10.90700 | 12.41940 |
| H | 4.56350  | 11.33380 | 14.12710 |
| H | 14.52730 | 11.62650 | 22.14550 |
| H | 12.82930 | 12.13130 | 21.94450 |
| H | 14.07230 | 13.36930 | 22.21800 |
| H | 21.28850 | 13.21350 | 8.18510  |
| H | 20.98950 | 14.96580 | 8.20350  |
| H | 20.36930 | 13.99730 | 6.84610  |
| H | 7.44230  | 16.03680 | 7.45320  |
| H | 7.51080  | 17.29330 | 8.74090  |
| H | 6.69630  | 15.75350 | 9.05130  |
| H | 9.25380  | 21.79730 | 15.48850 |
| H | 10.87630 | 22.02450 | 16.20970 |
| H | 9.65100  | 21.11580 | 17.10830 |
| H | 19.84650 | 18.07350 | 14.29870 |
| H | 18.79100 | 19.28580 | 13.49430 |
| H | 19.41650 | 17.91350 | 12.56420 |
| H | 16.19200 | 5.47650  | 14.36390 |
| H | 15.50980 | 4.74200  | 15.49520 |
| H | 16.58000 | 6.03800  | 16.05500 |
| H | 12.68100 | 9.93320  | 4.70650  |
| H | 13.62280 | 8.58230  | 5.37420  |
| H | 14.48450 | 9.94500  | 4.62050  |
| H | 15.93650 | 14.99000 | 11.33730 |
| H | 15.16680 | 9.44850  | 11.52350 |
| H | 12.76200 | 16.71350 | 7.63780  |
| H | 10.47980 | 15.50800 | 17.08950 |
| H | 12.01380 | 17.69680 | 9.32910  |
| H | 13.50180 | 17.09880 | 18.25900 |
| H | 9.18150  | 13.61030 | 16.82850 |
| H | 18.17700 | 11.39730 | 11.42990 |
| H | 22.12180 | 10.70380 | 14.32260 |
| H | 21.62480 | 10.42900 | 16.01500 |
| H | 22.23180 | 12.02600 | 15.54360 |
| H | 9.73830  | 9.58000  | 14.21970 |
| H | 8.26780  | 7.61780  | 9.27970  |
| H | 7.63600  | 7.09530  | 10.87550 |
| H | 9.02780  | 6.25680  | 10.17200 |
| H | 17.98680 | 13.56200 | 17.17560 |
| H | 9.41850  | 15.03130 | 21.66190 |
| H | 10.07450 | 16.70800 | 21.55040 |
| H | 11.12490 | 15.37280 | 22.06200 |
| H | 14.16230 | 19.44230 | 9.44230  |
| H | 10.08100 | 7.67080  | 19.08610 |
| H | 10.53500 | 6.75900  | 18.37000 |
| H | 9.32330  | 7.86650  | 19.03300 |
| H | 15.18250 | 14.68480 | 7.80180  |
| H | 15.90500 | 19.74150 | 6.42250  |
| H | 16.11950 | 20.65330 | 7.74070  |
| H | 14.56500 | 20.77550 | 7.54550  |
| H | 11.14700 | 7.75830  | 14.41280 |
| H | 17.12280 | 20.74350 | 17.87270 |
| H | 18.22750 | 19.43680 | 18.37840 |
| H | 16.90980 | 19.91900 | 19.46260 |
| H | 9.80100  | 12.43230 | 9.46350  |

192

./Thermo\_CH3COOH\_16-H\_0\_2-Domain2.yxz

|    |                   |                   |                   |
|----|-------------------|-------------------|-------------------|
| Ru | 15.1518768847399  | 12.63852577826620 | 15.68181629927896 |
| Ru | 15.13748345270525 | 12.57194677183878 | 11.41311827654457 |
| Ru | 15.14782882988457 | 11.05853766969584 | 13.60179578977617 |
| Ru | 13.3393963286583  | 14.90564533039370 | 15.79119205137872 |
| Ru | 13.63925320742796 | 14.87517983973913 | 11.43183624188325 |
| Ru | 12.44687526669081 | 12.4706957840538  | 15.71233626519266 |

|    |                   |                    |                   |
|----|-------------------|--------------------|-------------------|
| Ru | 13.81688036021416 | 13.35511897862926  | 13.57823916017713 |
| Ru | 12.40791888953592 | 12.51073946407655  | 11.44705992386166 |
| Ru | 12.40972384326653 | 10.86110093990432  | 13.59952409121808 |
| Ru | 12.40281201559974 | 15.66004000326605  | 13.60541734866298 |
| Ru | 11.14493305116458 | 13.19845092184726  | 13.58525864548294 |
| Ru | 8.52647963505332  | 13.20804346858589  | 13.58975523110284 |
| Ru | 9.7172202647451   | 15.3656035597000   | 13.05308102049616 |
| Ru | 9.74872089608850  | 10.80058861202382  | 13.67724483384270 |
| Ru | 10.84230120691303 | 17.65187556485589  | 13.58780214135146 |
| Ru | 10.91310554756047 | 13.08716222344401  | 9.41328395756144  |
| Ru | 9.78750150168086  | 12.34066022139069  | 11.63014883708531 |
| Ru | 9.76758581767382  | 12.45862796828230  | 15.6655416200979  |
| Ru | 11.02369386649516 | 13.21847816592022  | 17.72346959727557 |
| Ru | 12.35212478999565 | 15.62233941462259  | 9.37544463439074  |
| Ru | 10.97838531862291 | 14.71360367365977  | 11.46095740616690 |
| Ru | 11.07044816874741 | 14.7335515416612   | 15.66902978123972 |
| Ru | 12.31618343958078 | 15.51946596837577  | 17.91254208437154 |
| Ru | 12.16240363498203 | 17.17203498716747  | 11.48683882109873 |
| Ru | 13.57522552360809 | 16.01110341053601  | 13.60109255250123 |
| Ru | 12.33951120442216 | 17.09083495093758  | 15.715335201625   |
| Ru | 11.24467692447534 | 8.60128769073732   | 13.70838357658061 |
| Ru | 12.44334348788755 | 11.01863067796681  | 9.35518600755847  |
| Ru | 11.15686873133470 | 10.14313471753741  | 11.50536436032684 |
| Ru | 11.19257228582321 | 10.12384063809233  | 15.77870873909795 |
| Ru | 12.5930994621615  | 10.99366772514760  | 17.34659619207646 |
| Ru | 13.70894739337041 | 13.35195157973482  | 9.28758094863981  |
| Ru | 13.75218789978233 | 13.3285959238003   | 17.84162777110367 |
| Ru | 15.04150774283235 | 15.59029718044247  | 9.19951651830943  |
| Ru | 15.00664242077525 | 15.66371943757792  | 13.51387955453077 |
| Ru | 15.08490013073613 | 15.61311832179096  | 17.84194520589376 |
| Ru | 14.95489815152481 | 17.11701106400362  | 11.39323140249573 |
| Ru | 14.96681394719408 | 17.16477297213591  | 15.62595387060177 |
| Ru | 13.94018326702268 | 8.77663601912717   | 13.61478589546345 |
| Ru | 12.7753764523454  | 7.8851587551060    | 15.58230725217301 |
| Ru | 15.00891678325703 | 11.020211021646251 | 9.30978843431700  |
| Ru | 13.8003734541622  | 10.19615390356413  | 11.36376249828313 |
| Ru | 13.80464018103404 | 10.20539789916563  | 15.73384835606909 |
| Ru | 15.11301210805212 | 11.05295457754019  | 17.74079560397129 |
| Ru | 16.31415403879502 | 13.39325855704375  | 9.25424745173271  |
| Ru | 16.47821631318529 | 13.36082067379252  | 13.51776423317109 |
| Ru | 16.33660187026805 | 13.37277558575723  | 17.75764640673004 |
| Ru | 16.29199216783496 | 14.92161956243791  | 11.23694162838029 |
| Ru | 16.38228977143284 | 14.95898519014965  | 15.64543092776064 |
| Ru | 16.39281444063239 | 13.8362672956304   | 13.54078037017991 |
| Ru | 16.45249158895410 | 10.2714773711788   | 11.38560196997120 |
| Ru | 17.81112918769554 | 11.0137344930299   | 13.47200708052741 |
| Ru | 16.50080167874233 | 10.40851517772815  | 15.6488449293348  |
| Ru | 17.7066629558416  | 12.75332298049301  | 11.36685060671189 |
| Ru | 17.82408131261069 | 10.53260988221539  | 15.74531049653658 |
| C  | 5.34678748647575  | 10.30217849659951  | 13.00118023969466 |
| C  | 6.06808437093455  | 10.957415906753    | 13.20370990819    |
| C  | 15.24662968411378 | 12.33181985771759  | 21.87611121646711 |
| C  | 15.13622550708043 | 12.67473513626785  | 20.41316845313725 |
| C  | 20.29501965452475 | 12.43219076345575  | 7.81475399891691  |
| C  | 19.12134220828025 | 12.58874218972942  | 8.74457010208408  |
| C  | 7.18269999220483  | 15.37727977580914  | 9.18181931304050  |
| C  | 8.40857425160375  | 14.9542356417788   | 9.6297505944908   |
| C  | 9.76469220925018  | 20.4495072832462   | 16.7765775652114  |
| C  | 10.35013116088002 | 19.27369708786533  | 16.03603219312812 |
| C  | 19.18062621154499 | 18.10832630621478  | 14.54545258793739 |
| C  | 17.95375098207187 | 17.36614933657293  | 15.00802432780860 |
| C  | 16.20624205104977 | 5.18914076933236   | 15.20481048835194 |
| C  | 15.1570421200394  | 6.21740241465089   | 14.8995131879062  |
| C  | 13.62704101540521 | 9.91269186837328   | 5.31910457585682  |
| C  | 13.63618281568076 | 10.27184175073835  | 6.77898760946109  |
| C  | 21.83223460135828 | 10.81096834596699  | 15.19291172219205 |
| C  | 20.38760077584920 | 11.16761133045401  | 14.95398044841064 |
| C  | 8.55478273553086  | 6.62141244967090   | 10.91647642322192 |
| C  | 9.51220404131496  | 7.6288090991235    | 11.40294307329292 |
| C  | 10.2406023717363  | 14.8532820188247   | 21.7651853539031  |
| C  | 10.72805390670733 | 14.69026998548960  | 20.29110119971013 |
| C  | 9.10680574661050  | 9.11327330440678   | 19.62853063405386 |
| C  | 10.11733766748981 | 9.5739413216726    | 18.61023960547532 |
| C  | 15.68354515617142 | 19.70866716922534  | 7.85883699111417  |
| C  | 15.47062113090415 | 18.52666514253988  | 8.70126899151501  |
| C  | 15.98054100195558 | 9.4421709974842    | 19.09021154106061 |
| C  | 15.57724099086590 | 18.53035854460462  | 18.25321029194817 |
| C  | 12.60873867914562 | 21.54800623061546  | 11.2243278435029  |
| C  | 12.68271802772377 | 20.11271532762282  | 11.67189548091349 |
| C  | 12.09717297868712 | 14.74035372361744  | 5.14353754287015  |
| C  | 13.07466332651816 | 14.6553328224517   | 6.64572658959881  |
| C  | 6.6090507081816   | 15.32454023035930  | 13.4273860854692  |
| O  | 7.2839137812136   | 10.20733673014765  | 13.21874589362204 |
| O  | 14.05689238144699 | 13.18386737279093  | 19.99173484872381 |
| O  | 16.16175943709474 | 12.39610653532913  | 19.65767217027595 |
| O  | 17.96850673028649 | 12.78624537536657  | 8.19875862833498  |
| O  | 19.31828376546980 | 12.54346473774656  | 9.99830974255740  |
| O  | 9.05939507081816  | 15.32454023035930  | 10.64770099147943 |
| O  | 8.96977625165111  | 13.79758529193705  | 8.97497453823615  |
| O  | 11.06688923888500 | 18.44526784445520  | 16.6904922391035  |
| O  | 10.11819929555823 | 19.18243734506450  | 14.77921270445734 |
| O  | 16.87386365577702 | 18.02416704136905  | 15.1641244049611  |
| O  | 18.0656170391197  | 16.10224498521373  | 15.19137322096822 |
| O  | 14.17232390561515 | 6.3550920585021    | 15.65090454119246 |
| O  | 15.29533762887898 | 6.93167403612535   | 13.83021092378408 |
| O  | 14.77206481760905 | 10.37562370742253  | 7.36733046569244  |

|                               |                    |                   |                    |
|-------------------------------|--------------------|-------------------|--------------------|
| O                             | 12.51082842285226  | 10.41552859817023 | 7.37446379750575   |
| O                             | 19.81637218729669  | 11.92330869718712 | 15.81733095446949  |
| O                             | 19.81522385443660  | 10.67428159982882 | 13.92149406722795  |
| O                             | 10.01706942584335  | 7.36160469321495  | 12.649259460427909 |
| O                             | 9.767575687966773  | 8.68368719392326  | 10.83548657760626  |
| O                             | 11.42426768860377  | 15.64083445859214 | 19.7906119180856   |
| O                             | 10.4275263713208   | 13.60509455703424 | 19.68057490247151  |
| O                             | 9.88090826346369   | 9.38192037618523  | 17.38883731133485  |
| O                             | 11.16630226965360  | 10.17178631719343 | 19.06541837779966  |
| O                             | 15.340608859726728 | 18.74391703384062 | 10.02412964507647  |
| O                             | 15.42318080942524  | 17.36400064347157 | 8.21875540051703   |
| O                             | 15.72728943135718  | 17.3662364400758  | 18.7737293989399   |
| O                             | 15.12895829306097  | 18.74769747503555 | 17.08326591875466  |
| O                             | 12.09777015950172  | 19.23100625224930 | 10.96833176178326  |
| O                             | 13.30703941352606  | 19.87095873307895 | 12.76546204487020  |
| O                             | 12.77405984028107  | 15.71623588746514 | 7.30507593180401   |
| O                             | 13.41785482283206  | 13.54161137677956 | 7.16901266896620   |
| H                             | 9.16032330250960   | 17.05588693431714 | 13.34544117989488  |
| H                             | 11.06490608909254  | 14.70645573831440 | 8.66025058195014   |
| H                             | 9.15842466651501   | 10.73943990213591 | 15.34735581522345  |
| H                             | 15.24555918854049  | 18.10767423187912 | 12.77591674560679  |
| H                             | 13.12942988084768  | 18.64159167368810 | 15.15140322808336  |
| H                             | 12.49093110327490  | 9.16528545933302  | 10.68457370212058  |
| H                             | 13.92609932318286  | 10.2763789932416  | 18.86476645612781  |
| H                             | 16.65914221230424  | 16.74064198116147 | 11.53265957185588  |
| H                             | 16.68567488482659  | 10.06877531523632 | 9.65654360894179   |
| H                             | 16.83185675339805  | 15.23706728831312 | 17.42716647169015  |
| H                             | 18.23143420668976  | 12.83212368592523 | 13.99847453095651  |
| H                             | 17.24741712652465  | 8.79580889267849  | 15.09028029717924  |
| H                             | 5.4226809738112    | 9.21421468922422  | 13.17250558913504  |
| H                             | 4.95810671447872   | 10.55472394821552 | 12.08306251248133  |
| H                             | 4.63009242117904   | 10.70065997571960 | 13.81893851013149  |
| H                             | 16.26861396769778  | 12.04196251240811 | 12.13585786308765  |
| H                             | 14.56221208109644  | 11.49770890459430 | 22.08722803580201  |
| H                             | 14.92217688589745  | 13.18767874934391 | 22.47897001102674  |
| H                             | 21.12528887706489  | 11.93514104998841 | 8.32681378234268   |
| H                             | 20.62623618725686  | 13.42979947348524 | 7.48932817707312   |
| H                             | 19.90836056112154  | 11.8713568690514  | 6.92067085257808   |
| H                             | 6.80644932173055   | 14.85670623209418 | 8.29570536440911   |
| H                             | 7.31530348938959   | 16.44554920737709 | 8.96415160376285   |
| H                             | 6.45317113265075   | 15.29950084268296 | 10.0006725932490   |
| H                             | 8.85891850954537   | 20.80729246304914 | 16.27810070711845  |
| H                             | 10.596750849649382 | 21.25884994644744 | 16.78150763793468  |
| H                             | 9.55594658970719   | 20.17389432396603 | 17.0524104280912   |
| H                             | 20.08803421322686  | 17.63887522615564 | 14.94176197868861  |
| H                             | 19.12507342489465  | 19.16309505572499 | 14.83513989716998  |
| H                             | 19.21941369938389  | 18.05307330280885 | 13.44698785663215  |
| H                             | 16.49971297414842  | 4.66061851440514  | 14.28964077585482  |
| H                             | 15.85415713771064  | 4.48592254695556  | 15.965909460608132 |
| H                             | 17.09049542230847  | 5.71041870452998  | 15.58939437016019  |
| H                             | 12.79257623736309  | 10.41079175589881 | 4.81282019330476   |
| H                             | 13.47991460759488  | 8.82651723229665  | 5.22046176039463   |
| H                             | 14.58129392927125  | 10.17724141033065 | 4.85168369090931   |
| H                             | 18.01632840729949  | 14.49088675817964 | 11.58101197526940  |
| H                             | 13.59077911884495  | 16.84527656954315 | 9.99866210667684   |
| H                             | 10.61604659093770  | 15.2176053403107  | 17.30801667534096  |
| H                             | 11.26657249600092  | 16.9094927408713  | 9.97447150531621   |
| H                             | 13.69084213834679  | 16.08649476565947 | 18.84491618342530  |
| H                             | 9.44139495206606   | 12.46089794361221 | 17.44094039252647  |
| H                             | 18.16288519011364  | 10.91150192508005 | 11.60698468493678  |
| H                             | 22.31197437022007  | 10.50581052786796 | 14.25894040313210  |
| H                             | 21.87899246904068  | 9.98006259788625  | 15.90688043583888  |
| H                             | 22.3598394949534   | 11.66695796690862 | 15.6393562566271   |
| H                             | 8.34798755303694   | 6.84296881579688  | 9.86484297921114   |
| H                             | 7.61496116361122   | 6.65903092550095  | 11.48671611375460  |
| H                             | 8.96307069580726   | 5.60817750388712  | 11.02296881357977  |
| H                             | 8.06966648453047   | 12.83563714977928 | 17.44677395641224  |
| H                             | 9.27974247121717   | 14.34394237302772 | 21.84136718535564  |
| H                             | 10.15827112172513  | 15.91513549305076 | 21.96245104759315  |
| H                             | 10.97100614418641  | 14.38909081994048 | 22.38592808564225  |
| H                             | 9.58688742533956   | 8.92996137447607  | 20.59584610312472  |
| H                             | 8.58741707778766   | 8.21655048620721  | 19.27320520452583  |
| H                             | 8.36027287238029   | 9.91146894191612  | 19.76017316829469  |
| H                             | 16.14922037117632  | 14.73796083855673 | 8.09338950325118   |
| H                             | 16.40013050800898  | 19.44176324599939 | 7.07035830770135   |
| H                             | 16.02626353134023  | 20.57447674519731 | 8.42231937117957   |
| H                             | 14.72637783401456  | 19.94237906788224 | 7.37281347083244   |
| H                             | 11.0659506620637   | 8.24596902143177  | 15.56834055312053  |
| H                             | 15.49138325399564  | 20.62334885825118 | 18.73552515318318  |
| H                             | 17.06932817638360  | 19.84827460419562 | 19.01859521505408  |
| H                             | 15.73836562769632  | 19.53407543968348 | 20.15225484030609  |
| H                             | 10.36114704669614  | 11.42463023303095 | 9.9540517733262    |
| H                             | 13.3907764001091   | 22.14373164275630 | 11.70427332024979  |
| H                             | 11.6269676302760   | 21.95848303852201 | 11.50124899759449  |
| H                             | 12.69670613865392  | 21.60234085011325 | 10.13092778344489  |
| H                             | 16.34031787021935  | 9.70105329377722  | 17.22035784369467  |
| H                             | 13.55675012017641  | 13.92271104303906 | 4.67000590796581   |
| H                             | 13.37770846133574  | 15.7120816863309  | 4.80451835306161   |
| H                             | 11.94203587754869  | 14.6719555892275  | 4.83925417762631   |
| H                             | 15.22709606281624  | 9.03196162686618  | 11.19491344885565  |
| 200                           |                    |                   |                    |
| ./Thermo_CH3COOH_16-H_0_4.xyz |                    |                   |                    |
| Ru                            | 15.15800           | 12.79180          | 15.71570           |
| Ru                            | 15.07500           | 12.67900          | 11.33570           |
| Ru                            | 15.14480           | 11.16430          | 13.51270           |
| Ru                            | 13.80200           | 15.09950          | 15.73230           |

|    |          |          |          |
|----|----------|----------|----------|
| Ru | 13.61150 | 15.01500 | 11.40850 |
| Ru | 12.45630 | 12.62230 | 15.73810 |
| Ru | 13.78430 | 13.47200 | 13.57560 |
| Ru | 12.34380 | 12.64430 | 11.47090 |
| Ru | 12.43200 | 11.02780 | 13.60090 |
| Ru | 12.36580 | 15.78150 | 13.55510 |
| Ru | 11.12000 | 13.36400 | 13.60450 |
| Ru | 8.50330  | 13.43680 | 13.83410 |
| Ru | 9.73000  | 15.58130 | 13.60220 |
| Ru | 9.65700  | 10.98050 | 13.75610 |
| Ru | 10.87730 | 17.84250 | 13.66140 |
| Ru | 10.87330 | 13.22880 | 9.42060  |
| Ru | 9.70380  | 12.50300 | 11.73150 |
| Ru | 9.81580  | 12.67700 | 15.74950 |
| Ru | 11.13380 | 13.49980 | 17.85910 |
| Ru | 12.39500 | 15.78300 | 9.33060  |
| Ru | 10.94080 | 14.86330 | 11.44550 |
| Ru | 11.11150 | 14.95350 | 15.62890 |
| Ru | 12.49300 | 15.76900 | 17.91530 |
| Ru | 12.12650 | 17.30080 | 11.42210 |
| Ru | 13.50780 | 18.14780 | 13.55560 |
| Ru | 12.39350 | 17.28480 | 15.66160 |
| Ru | 11.16850 | 8.74850  | 13.74930 |
| Ru | 12.35730 | 11.19300 | 9.30120  |
| Ru | 11.04690 | 10.34430 | 11.58090 |
| Ru | 11.15150 | 10.30970 | 15.83010 |
| Ru | 12.48880 | 11.17200 | 17.86510 |
| Ru | 13.63230 | 13.43750 | 9.27910  |
| Ru | 13.79130 | 13.53930 | 17.82120 |
| Ru | 15.07000 | 15.61780 | 9.19310  |
| Ru | 14.98530 | 15.79480 | 13.47290 |
| Ru | 15.18450 | 15.78430 | 17.75720 |
| Ru | 14.90850 | 17.22200 | 11.33050 |
| Ru | 15.02730 | 17.37450 | 15.55790 |
| Ru | 13.98580 | 8.79300  | 13.53480 |
| Ru | 12.84700 | 8.16770  | 15.60160 |
| Ru | 15.04350 | 11.10900 | 9.19260  |
| Ru | 13.72700 | 10.31520 | 11.32610 |
| Ru | 13.85980 | 10.32950 | 15.75240 |
| Ru | 15.18770 | 11.30100 | 17.84590 |
| Ru | 16.31880 | 13.41650 | 9.20320  |
| Ru | 16.39930 | 13.50100 | 13.48700 |
| Ru | 16.47230 | 13.58430 | 17.71040 |
| Ru | 15.20530 | 15.83070 | 11.23430 |
| Ru | 16.44350 | 15.11600 | 15.53990 |
| Ru | 16.41650 | 8.95450  | 13.55510 |
| Ru | 16.42750 | 10.39750 | 11.35890 |
| Ru | 17.84530 | 11.15800 | 13.41210 |
| Ru | 16.53580 | 10.58580 | 15.65020 |
| Ru | 17.66850 | 12.82970 | 11.43920 |
| Ru | 17.83080 | 15.70300 | 15.62160 |
| C  | 5.24720  | 10.61020 | 13.40170 |
| C  | 6.61650  | 11.22380 | 13.53510 |
| C  | 14.08650 | 12.16980 | 22.03240 |
| C  | 14.23200 | 12.27030 | 20.53510 |
| C  | 20.61350 | 13.00930 | 8.25970  |
| C  | 12.31600 | 13.32300 | 8.97700  |
| C  | 7.33800  | 15.77280 | 9.01710  |
| C  | 8.62400  | 15.15430 | 9.49940  |
| C  | 9.96530  | 20.66550 | 16.87840 |
| C  | 10.50250 | 19.49980 | 16.09560 |
| C  | 19.24500 | 18.21000 | 14.32310 |
| C  | 18.01250 | 17.49950 | 14.82160 |
| C  | 16.24650 | 5.43830  | 15.55290 |
| C  | 15.17950 | 6.40230  | 15.12240 |
| C  | 13.36080 | 9.30880  | 5.52140  |
| C  | 13.48330 | 9.95000  | 6.87780  |
| C  | 21.80500 | 10.87380 | 15.24560 |
| C  | 20.30250 | 11.27980 | 14.96660 |
| C  | 8.50780  | 6.82850  | 10.81630 |
| C  | 9.45700  | 7.80150  | 11.47170 |
| C  | 10.04500 | 15.68780 | 21.53220 |
| C  | 10.66400 | 15.31930 | 20.20850 |
| C  | 10.22780 | 7.76080  | 19.40650 |
| C  | 10.83420 | 8.00950  | 18.49070 |
| C  | 19.65920 | 19.65920 | 7.74460  |
| C  | 15.54150 | 8.69150  | 8.69150  |
| C  | 16.50200 | 19.74730 | 19.00940 |
| C  | 15.90800 | 18.62900 | 18.19060 |
| C  | 12.24930 | 21.69850 | 11.31100 |
| C  | 12.43170 | 20.26000 | 11.74450 |
| C  | 13.01450 | 14.85600 | 5.10950  |
| C  | 13.06350 | 14.77400 | 6.61360  |
| O  | 6.67000  | 12.50930 | 13.56260 |
| O  | 7.62080  | 10.43730 | 13.59750 |
| O  | 13.85570 | 13.35000 | 19.96960 |
| O  | 14.69930 | 11.24750 | 19.91730 |
| O  | 18.22850 | 13.57300 | 8.34780  |
| O  | 19.37230 | 12.89980 | 10.17350 |
| O  | 9.17830  | 15.67200 | 10.52820 |
| O  | 9.06580  | 14.13280 | 8.86570  |
| O  | 11.29250 | 18.68780 | 16.70290 |
| O  | 10.16970 | 19.38300 | 14.86680 |
| O  | 15.95300 | 18.17330 | 15.00460 |
| O  | 18.11030 | 16.23280 | 15.00980 |
| O  | 14.16300 | 6.56100  | 15.87900 |

O 15.33880 7.02980 14.00280  
O 14.64750 10.14880 7.35200  
O 12.38670 10.24130 7.49110  
O 19.85000 12.14800 15.74090  
O 10.71800 10.71200 13.98700  
O 9.52900 7.47800 12.61300  
O 9.72800 8.88520 10.85800  
O 11.46200 16.17050 19.67710  
O 10.37700 14.17800 19.71420  
O 10.43300 8.83850 17.28610  
O 11.71380 9.58900 18.99170  
O 15.43650 18.76920 9.92810  
O 15.11250 17.34280 8.16240  
O 15.98480 17.44500 18.68720  
O 15.38930 18.89900 17.06640  
O 11.88450 19.35950 11.03150  
O 13.10350 20.05050 12.81150  
O 12.80730 15.85630 7.26180  
D 13.34080 13.65000 7.14770  
H 9.13730 17.25350 13.45370  
H 11.19950 14.77850 8.59090  
H 8.30800 13.20750 11.27520  
H 9.70300 11.11980 16.53340  
H 15.07930 18.37600 12.62200  
H 14.59030 18.51500 14.51600  
H 9.34620 9.37300 10.76450  
H 11.17800 11.99250 18.73870  
H 13.91700 9.96120 17.54710  
H 16.59830 16.84030 11.60850  
H 12.54100 7.86150 13.02680  
H 16.05950 12.85180 8.08200  
H 16.53950 10.24720 9.50350  
H 16.64730 12.02880 18.56110  
H 16.95230 15.34830 17.33940  
H 18.23180 12.93050 13.87720  
H 17.21950 8.96900 15.15410  
H 5.27950 9.53750 13.61440  
H 4.88800 10.76350 12.37310  
H 4.54250 11.11530 14.07380  
H 14.79680 11.44500 22.44400  
H 13.06650 11.82480 22.26040  
H 14.22300 13.15450 22.49360  
H 21.37950 12.88380 8.57740  
H 20.95900 14.60900 8.53270  
H 20.47120 13.66450 7.17440  
H 7.13930 15.49250 7.97730  
H 7.38000 16.86280 9.12650  
H 6.51550 15.40230 9.64730  
H 9.06080 21.06430 16.40810  
H 10.73800 21.45000 16.89900  
H 19.36700 17.91480 9.76130  
H 20.13200 17.85970 14.86500  
H 19.13230 19.29430 14.41990  
H 19.38300 17.95780 13.26130  
H 16.76750 5.01750 14.68610  
H 15.81600 4.64780 16.17670  
H 16.98030 5.99150 16.15930  
H 12.50580 9.73850 4.98060  
H 13.17800 8.23180 5.65160  
H 14.28630 9.43930 4.95120  
H 17.94250 14.59550 11.70700  
H 17.01800 8.75380 11.88880  
H 13.40100 17.16950 9.99130  
H 10.74480 15.28830 17.37480  
H 11.27900 17.05350 9.78200  
H 13.84350 16.28350 18.86530  
H 9.35750 13.25430 17.32720  
H 18.17850 10.97350 11.59440  
H 22.27500 10.40950 14.34230  
H 21.08200 10.09100 16.01940  
H 22.37250 11.72730 15.63380  
H 9.75270 9.27480 14.62420  
H 8.27030 7.14650 9.79650  
H 7.58350 6.77380 11.40880  
H 8.95200 5.52480 10.80770  
H 18.16350 13.21230 17.29650  
H 9.10800 15.14180 21.68530  
H 9.88030 16.76980 21.58810  
H 10.74450 15.41100 22.33500  
H 14.42800 9.57650 9.92240  
H 10.79230 7.68650 20.34060  
H 10.19630 6.78950 18.89680  
H 9.19050 8.04800 19.63130  
H 15.96580 14.58530 7.97450  
H 16.21100 19.28430 6.79070  
H 16.52550 20.35980 8.20330  
H 14.88170 20.19350 7.55510  
H 11.14150 7.56380 14.96770  
H 16.11300 20.71600 18.65760  
H 17.59550 19.72380 18.89660  
H 16.27880 19.60680 20.07360  
H 9.94900 11.84030 9.95700  
H 12.86070 22.36900 11.92230  
H 11.18950 21.97300 11.41340  
H 12.51600 21.79980 10.25130  
H 16.28970 9.82530 17.13890

H 13.56730 14.02480 4.66000  
H 13.41780 15.81800 4.77180  
H 11.96380 14.80150 4.78690  
H 14.11500 8.64430 11.77750

218

./Thermo.CH3COOH\_16-H\_0.8.xyz  
Ru 15.10168092252020 12.73219045708595 15.62545167006170  
Ru 15.18090158529802 12.80172299939493 11.35749111619667  
Ru 15.1528160655524 11.10525338055566 13.51770821107466  
Ru 13.69693976383380 14.95249857617298 15.75751935005102  
Ru 13.64587416877280 15.12663340836653 11.29674476181881  
Ru 12.38693336481715 12.56647102483248 15.67860994941337  
Ru 13.734678718180576 13.44615888470905 13.54302264753270  
Ru 12.42349917353801 12.71944430920677 11.36726163731921  
Ru 12.2729582168966 11.02319339648961 13.44781148881309  
Ru 12.38896780996950 15.71441593335003 13.61042187674359  
Ru 10.97951617781170 13.30683669500754 13.57755778950020  
Ru 8.40885289835684 13.2796829883876 13.40409506624827  
Ru 9.51504052908026 15.40891102590158 13.75612271451385  
Ru 9.57421795369049 10.80956240928496 13.60108743082846  
Ru 10.82527447080267 17.56118121491627 13.06777510340878  
Ru 11.14541802416168 13.52802116548712 9.264685590969315  
Ru 9.768546640967860 12.54000911615855 11.46010491258404  
Ru 9.57170976467286 12.60966625734856 15.71319630322902  
Ru 11.01440995702940 13.23617161732712 17.90199552283133  
Ru 12.83883629901113 16.01121182080320 9.91650793830521  
Ru 10.91213351672809 15.04311756836552 11.56557830666160  
Ru 10.97415972550202 14.89688764980512 15.68738750172259  
Ru 12.26722588848434 15.65280522064394 17.83990836147017  
Ru 12.409901610839347 17.48836017754271 11.13588825378108  
Ru 13.33983317088371 18.16041726620900 13.47217050925120  
Ru 12.02891525541105 17.3439004504093 15.63464123821422  
Ru 11.15590652771538 8.66175818082620 13.51329867112346  
Ru 12.51359057441895 11.2855813216404 9.19253762323721  
Ru 11.14633924593605 10.36730607428164 11.22805317192591  
Ru 11.10024786644724 10.21393128148538 15.62737617253026  
Ru 12.41290755948192 10.97064653052985 17.78019382384618  
Ru 13.83150487256273 13.56573756950458 9.22748550080709  
Ru 13.7297877514120 13.32673304998674 17.83570258937536  
Ru 15.34670933304404 15.69352821180606 9.3438128137861  
Ru 14.91679792639178 15.78489565523870 13.51136623510103  
Ru 14.85794705191897 15.79004731307035 17.85350272931481  
Ru 15.06604663757139 17.31235267301803 11.45008284207449  
Ru 14.7833285431058 17.35065143680933 15.67736138094749  
Ru 13.77174808291995 8.82144475490144 13.5299832037666  
Ru 12.66412890411401 8.05532679260560 15.69597841163999  
Ru 15.13486281865546 11.28122499461497 9.16438757736456  
Ru 13.82987884612835 10.46751738241847 11.31514898416306  
Ru 13.67686505238498 10.32693203430351 15.58827268712168  
Ru 15.05337979375178 11.08885283683218 17.59380420610687  
Ru 16.5930809121484 15.551618790978030 9.3659691678030  
Ru 16.3767639600951 13.44742843262375 13.54109876057249  
Ru 16.3083607308432 13.47197973162786 17.76325512000159  
Ru 16.53980030718924 15.17606037434323 11.57954570871935  
Ru 16.39104618519223 15.01634712573189 15.62272205041509  
Ru 15.1702753846039 8.80750606494293 13.02158821748980  
Ru 16.4926308066515 15.53067110017345 11.228130809594  
Ru 17.78144669785314 10.87187644472002 13.5027746892159  
Ru 16.20982928539044 9.5740679417423 15.60798315787801  
Ru 17.79883742544540 12.76981105144536 11.54459905199819  
Ru 17.7212735315856 12.57583602354114 15.64688533761798  
C 15.69685379223669 6.11845718316872 18.1957455397205  
C 15.1983538711438 7.18715888746661 17.2539710372315  
C 19.55659524447475 17.62494826413894 13.79441156755208  
C 18.36962329664560 16.68406751086953 13.78517703062221  
C 13.71428489085529 9.74456139012096 5.29550093524888  
C 13.77330669139331 10.27399167634293 6.70440786847744  
C 7.7674564577858 18.68334158360732 15.98080461589174  
C 9.0609180649029 18.14873051100038 15.43500449335344  
C 20.87253935628434 13.12709683813833 8.43081523279574  
C 19.56933012597902 13.10437278256017 9.18788350803006  
C 7.79072861374358 16.33605812316481 8.68425794758263  
C 8.94763504251877 15.55049859279930 9.25256004203098  
C 5.16487396651527 10.4228785147401 13.30942721019227  
C 6.53456392686249 11.04907063457264 13.35663206604947  
C 15.4672707136959 22.0082569626138 21.75138044069614  
C 15.17173433830969 12.35959630028997 20.32037655373196  
C 21.84870757296930 10.97744884146083 15.22950764990155  
C 20.37668229805130 11.22875454061341 14.9954422712481  
C 9.98224464060983 6.26890126569253 9.99067566685189  
C 10.4553738245357 7.40826172736550 10.86194130617151  
C 9.2409579512154 15.72687098340425 21.000060932189  
C 10.0748764274842 15.31913583168375 19.8924370900865  
C 9.26380193650223 8.30696136760769 19.22262708226524  
C 10.19861988913245 9.05513759806967 18.30507144807096  
C 17.05741336252736 19.5546737635165 8.2314682313663  
C 16.32725166574750 18.50204266155264 9.07401925338996  
C 17.0118092765118 19.0283077247180 18.41416653830933  
C 16.75578095846194 18.12568484846046 17.8202261479418  
C 12.97759822521113 21.83553557604915 11.04647379436026  
C 12.95126098426790 20.39890656360183 11.50110248453244  
C 13.49312411824048 14.46712068362246 4.86871210355324  
C 13.4150683944532 14.57459535984927 6.37139706488351  
O 9.00080326400442 17.63400657179891 14.22210096477219  
O 10.1095125924155 12.1544411530565 16.12488121092755  
O 12.64729467397415 10.5104946428444 7.2747417912036

0 14.91189892808456 10.46530276238288 7.24585230997320  
0 17.83214536106320 16.50137082917141 12.63554066129631  
0 18.01899656164241 16.19833413031543 14.91066236866489  
0 16.01806628683011 8.07455840836076 16.88597724137922  
0 13.95119520792695 7.10732014298316 16.92490811657821  
0 18.51329114618540 13.42422775806614 8.53998447289478  
0 19.510983276611363 12.7408092981117 10.4313987316613763  
0 9.22510362235769 15.76252628689853 8.08695221075777  
0 9.56591951637737 14.75066049771199 8.46856689564457  
0 7.54500245541812 10.30718625345890 13.14785410063147  
0 6.59128850628459 12.30856058021604 13.62162985447161  
0 16.08456593445115 12.02242792586324 19.42919075160881  
0 14.06899017426887 12.91893617597016 20.02415984144727  
0 19.76797111247778 11.94652527162899 15.85859056688803  
0 19.8599282098112 10.71963503844459 13.94392085268660  
0 10.55442875474089 7.18031910124527 12.11748791460711  
0 10.70646141195902 8.52006612979977 10.27929026008539  
0 10.9836381009824 16.12645570938089 19.50637018932355  
0 9.8139085625016 14.18118450982331 19.36333785146239  
0 11.26315427958302 9.54533307501432 18.82567914455434  
0 9.87279535507953 9.16769776380598 17.07773967823420  
0 16.01294854179549 17.42280986626811 8.40078871164795  
0 16.08061227286286 18.73828871046139 10.25554943161057  
0 16.39513521684807 17.1217438802396 18.52403607135363  
0 16.30971925973904 18.4368955925327 16.42924796  
0 12.68993451082748 19.51310711120336 10.60963414643478  
0 13.15820735464540 20.16831914277703 12.73478526892876  
0 12.79283118960714 15.58510424345118 6.847690511066337  
0 13.99078581326957 13.67016472332052 7.06716105189841  
H 7.83806167604908 14.98906066312088 13.75863201915261  
H 10.91953961972365 19.13283324069142 13.43035364134266  
H 12.0329840601755 17.32492475729430 17.46544216993150  
H 11.51196837316138 12.05785989697357 19.03983977232312  
H 8.13784990446861 13.12999010867493 11.56940923320917  
H 7.97788115128371 12.77622525493067 15.86918583153475  
H 9.46694382588814 12.94027028390678 9.85761565910227  
H 11.46774317433952 15.23609029181778 9.86902636593070  
H 12.32284574106131 14.09701078319213 18.8113295445488  
H 10.71317085377919 17.99775032587526 11.34020524149577  
H 14.92834488280698 18.5205722844544 12.6829656915238  
H 12.35764038025676 18.84313799399873 14.79440506262162  
H 9.96948947531029 9.60065288945327 12.36118358049279  
H 10.8887085294964 12.03798295434708 8.47841213116534  
H 13.93504925732315 9.92085103215696 9.0663094307069  
H 10.9964653185428 7.99162080908814 15.15350937699612  
H 13.47122901440313 17.32052894148604 8.24802918686435  
H 13.68318464058835 16.18366579749366 19.02060115731804  
H 13.80296077510531 10.28030672212176 18.63142819943804  
H 14.61123941366950 16.79299281238361 14.6325594097971  
H 15.59369214610667 14.5208768564014 18.93952373351705  
H 13.2751085711116 10.1289719639282 10.7144724039879  
H 14.28201015456021 17.32467765772305 17.47042563673940  
H 10.82835365507280 11.62768685695515 16.89325803193362  
H 12.56420298648034 7.47499972174316 14.00557421021970  
H 16.64060502326274 10.30884424193410 9.48233193426966  
H 16.39867167864614 8.74428108028091 11.24535951559205  
H 16.67390460755223 10.4946708959357 17.1473281219446  
H 18.44858497437277 13.98537887817230 15.6671711798678  
H 18.12127421502190 14.51593712526271 11.41890456200507  
H 17.89742563500611 12.76713849161743 17.38351693966126  
H 18.14674579245723 12.73127284836211 13.86638470731368  
H 17.99719461812806 9.22114610754075 13.14341312031752  
H 18.3215113593685 11.00079657634682 11.80774211835965  
H 17.1906046937060 10.62986640880136 15.2848943659395  
H 15.50403828412943 5.12718398308017 17.76424639913649  
H 15.13417917960222 6.1796571377625 19.13787280324760  
H 16.76595540135123 6.24291838129051 18.39311207514259  
H 15.87225660136508 17.19216093867027 14.42605827032131  
H 19.9641702816014 17.7220850931623 14.8051203758185  
H 19.23497650936313 18.60860387483048 13.42548048701951  
H 20.3293325578919 17.25218992506700 13.10896508616213  
H 9.32503306080657 14.25025104064501 16.15857873159064  
H 14.67981965184822 9.23484876893182 5.05338459416093  
H 13.61479244878120 10.59142249410422 4.60427352930969  
H 12.8852344295734 9.07824585097894 5.16146395248751  
H 13.31525196804669 18.2794099524035 16.30847497442736  
H 7.90886462518915 19.0821240314231 16.98986438958134  
H 7.01715149575463 17.88022764976033 15.99360334067994  
H 7.38772128009562 19.46982244026661 15.31362615481994  
H 9.33858631843334 12.5781648881379 17.44326724671425  
H 21.72053476163231 13.05714490976507 9.11909966841393  
H 20.9307376242488 14.03808419169545 7.82325472990928  
H 20.89692594613323 12.26953447883202 7.74279257717644  
H 10.54223424872403 15.73991936470112 17.08972961129010  
H 7.47975974696403 15.92271701365636 7.71964315956747  
H 8.10705462689640 17.38034166804881 8.54611583400130  
H 6.9546599310909 16.3381607947282 9.39446702515997  
H 8.0469754201421 11.06542481787611 15.23361314041133  
H 4.45189813493131 11.10164007657851 12.82655512272698  
H 4.82132980362648 10.25408023572427 14.34096803994824  
H 5.20840357101820 9.46068370662558 12.78872975926344  
H 11.68513002892334 13.57894727356894 7.76836021657464  
H 14.96494276527875 12.71229489752065 22.42362470122996  
H 15.51590814644281 11.99081765129800 21.9332422754777  
H 15.06828617424210 11.0017252421408 21.95113993550818  
H 11.9209430861693 17.4435116369328 9.4032333717405

H 22.20878266414030 10.160990153647297 14.59564273161820  
H 22.02792858214265 10.75337363224840 16.28002990366324  
H 22.40688310170445 11.89290162906979 14.98526814518821  
H 17.09426508219698 15.32548886619766 9.76720569415390  
H 10.26510870278226 6.43899637644586 8.94675899735911  
H 8.88521405705517 6.21194544645993 10.05246621946778  
H 10.3870921478766 5.31789327958932 10.3543285567355  
H 14.09914618565843 7.51377388264895 13.02579764941668  
H 8.40768181919508 15.0433985445556 21.2343183399419  
H 8.86739105209715 16.7585395037102 20.93512358376923  
H 9.87828802893351 15.7440050646450 21.97524028922824  
H 16.32963404648108 12.23244206775669 8.24543299750627  
H 6.65798812000953 7.59113305392659 18.6566099414448  
H 8.58893746955422 9.03458442803573 19.69804163829334  
H 9.82756604922532 7.80159497290775 20.01500240191796  
H 17.04645586244747 15.0216033873313 17.28951322819886  
H 16.89833240275463 20.54492466408949 8.67113113592499  
H 16.73663304201121 19.53591464072496 7.18362074238412  
H 18.13400334958061 19.33174558100808 8.25989976752943  
H 9.57949338740450 9.2492683228234 14.25721303251782  
H 17.99792629085198 19.89057409802642 17.76689745102542  
H 18.73928783225066 18.45502564159853 18.54670289203510  
H 17.48912425376514 19.36416379135173 19.40859579507656  
H 9.53909826178233 11.00231131212705 10.6750928530373  
H 13.5952307107126 22.449111855097 11.7316574045215  
H 11.94622537589037 22.21574378996117 11.02660458703569  
H 13.37924633916254 21.90830380863923 10.02278192687943  
H 16.73167971001305 8.36338091583695 14.61671857542891  
H 13.67694975244135 13.43214588653365 4.56245037042506  
H 14.32696855174642 15.09009722429570 4.51226898576237  
H 12.57091689765138 14.84809093947707 4.4165241761968  
H 12.9382370409316 9.02331640050255 11.95053045860915  
236  
./Thermo\_CH3COOH\_16-H\_1.2.xyz  
Ru 15.23612802402210 13.00174767591355 15.45589917965227  
Ru 14.95934741874521 13.05602439936863 11.13636187592690  
Ru 15.31084895832677 11.44653359248850 13.3075895180130  
Ru 13.60747430575619 15.27103180807056 15.68302127359174  
Ru 13.28764357173820 15.28683275967492 11.32531938662342  
Ru 12.41246161294332 12.67622407627471 15.61686023599194  
Ru 13.63315380333634 13.65722337044647 13.40676095675622  
Ru 12.29873630428934 12.73285929300469 11.25060886111360  
Ru 12.47097279532557 11.14776341559095 13.34443066268334  
Ru 12.83587180939065 15.83393221903013 13.51422501557807  
Ru 10.92262731112528 13.29097597870901 13.40107334175816  
Ru 8.11183325318859 13.02248512037382 13.41213149462696  
Ru 9.17804177047879 15.32088878038512 14.07680149735315  
Ru 9.78444616809754 10.81265140980865 13.53232374537593  
Ru 10.29879361097799 17.83187632885828 13.72945311614343  
Ru 10.74284455170235 13.41808315323235 9.19751277695204  
Ru 9.60933075625174 12.32637821589616 11.37117509640140  
Ru 9.79789369765875 12.52110588506273 15.73467216640996  
Ru 11.19057317257922 13.30125515870044 17.91845178583202  
Ru 11.80883438048038 16.81826957079212 9.03461762171567  
Ru 10.62295869301808 14.89976068749051 11.33687919754818  
Ru 11.00839707646465 14.88190581857747 15.80968859716244  
Ru 12.27380440075 70.319861349089 17.89294031602115  
Ru 11.73141781109993 17.36701126086940 11.50266817628911  
Ru 12.92922587655021 18.38773946558922 13.55264167157346  
Ru 11.92193134685262 17.41561793324999 15.84119242873809  
Ru 11.44015217343033 8.6680688690378 13.56552938094256  
Ru 12.29629567907216 11.38649245497921 8.99523575802268  
Ru 11.19098280660000 10.19014204253689 11.3091290326370  
Ru 11.35660197824783 10.2981369523026 15.53902765302274  
Ru 12.62493638484765 11.12335234862181 17.72855169085017  
Ru 13.37921636304207 13.7815906725241 9.14478834247392  
Ru 13.84934929030447 13.55461651003140 17.64590261699912  
Ru 14.51568453788712 16.25767120409688 8.98637142393405  
Ru 14.62116971735345 16.12254282198682 13.41404117304292  
Ru 15.01510263380013 16.28627466228142 17.80454828614083  
Ru 14.42955712454589 17.60360641948775 11.34674363160126  
Ru 14.5804113669655 17.65063643333007 15.48234563871620  
Ru 14.13163645245749 8.94792755625233 13.39123180834171  
Ru 12.85613858113679 8.20877858251800 15.6469942790191  
Ru 14.99597273790250 11.6804315667892 8.85417201933066  
Ru 13.86321269542065 16.30847497442736 15.53923455604675  
Ru 14.0828576261020 10.59587801633226 15.54394356514886  
Ru 15.41222812179762 11.52680717528913 17.67460907466463  
Ru 16.04708659995594 14.05148368195053 8.94691005218754  
Ru 16.29530222708841 13.90931593249669 13.24450219719146  
Ru 16.441066261810 13.94302461981800 17.6035692632391  
Ru 16.963270564102 15.56123072463613 11.151731316215  
Ru 16.22874088233079 15.47001760181066 15.33920062409352  
Ru 16.75104216703556 9.35156437781900 13.07400229640390  
Ru 16.57956143396069 10.88542664312318 11.01100422929617  
Ru 17.98716335007511 11.79521456189138 13.13767070498663  
Ru 17.9908837771704 10.69710894429876 15.42234009097352  
Ru 17.55144740097108 13.4641186455400 10.99322418140493  
Ru 17.86659359798248 13.35243636972918 15.35822362238744  
C 12.36167641337506 7.2107979213242 19.91692423283315  
C 12.54057201842999 8.11734935474877 18.72181164471730  
C 13.83962689816078 8.56861606245624 5.9326118940061  
C 13.7628822791062 9.59267811893899 7.03984651597705  
C 6.64285905036717 21.4931968444281 20.14933356801805  
C 5.1387234662678 19.2376135952357 16.22831421617652  
C 18.59217584599247 19.11099411042065 14.4394085764136

C 17.44139601794181 18.19991391824177 14.78141478992935  
C 20.20531390710873 14.23016175437239 7.53087438895107  
C 19.02141820769156 13.94672594805731 8.42173438025314  
C 6.97893929891570 15.61206804573556 8.85165120439257  
C 8.27482836311310 15.03249454054032 9.35939640288336  
C 5.55246680152638075 9.465890152638075 13.87347761626780  
C 7.15941820215 10.3511931354515 13.653569492053  
C 15.96402478103875 8.86084183001608 21.02966344676769  
C 15.58598330544130 10.12775103560719 20.27760268279101  
C 22.04708900545451 12.02230534230738 14.87937834632521  
C 20.57342867060037 12.25913805366828 14.64549548128744  
C 9.81224418963269 6.39398259818400 10.74224758778777  
C 9.895549314925 4.74643637848239 11.3021913428563  
C 9.9717249815672 15.31734631833465 21.6424380648470  
C 10.56771971388478 15.06245796138605 20.2808989435382  
C 19.00137413139957 6.86658980755174 15.8065911104312  
C 18.14960135180509 7.97811613792630 15.33534632869389  
C 15.04029464496087 20.57725172217155 8.14983845555501  
C 14.811417819308978 19.2900318782089 8.99480233548075  
C 18.12068065718714 16.28293653535344 20.959003179381  
C 17.27844100864795 15.87521739670095 19.77455386449473  
C 11.84241373432863 21.73633753906676 10.93711045625372  
C 12.02874721511920 20.34205319202929 11.48034261677691  
C 13.22669015238808 15.4427693359662 4.98237880830756  
C 13.22669015238808 15.4427693359662 4.98237880830756  
C 10.64637201858221 18.89680562247646 16.71593111540128  
O 9.05279037729247 18.85778449299028 15.1066974962514  
O 14.86713276653359 10.14183096510940 7.38431540697581  
O 12.61023171099419 9.84177375418514 7.53480662789107  
O 12.47042298567208 7.54019967363912 17.56195465184775  
O 12.73110770525342 9.34781426987825 18.95396544712463  
O 17.60737544830994 16.94632794258397 14.63990795301447  
O 16.34960016953034 18.73775038690135 15.1712264982131  
O 17.86261722219172 13.96512630908802 7.86699276908981  
O 19.23441141786731 13.72716137901570 9.65688060294220  
O 8.70104635015539 15.43885581505132 10.49041695404137  
O 8.87172695756814 14.17988757449960 8.61234778751356  
O 7.89018472827439 9.77663951924730 13.54045240393889  
O 6.54575420119479 11.61467947302054 13.6248390389089  
O 15.22171142369931 11.15354880249118 20.8526404675767  
O 15.73339250675845 9.99152321234506 18.961804862738  
O 20.03805942932748 11.60919493508479 13.68273260507095  
O 19.98471824838968 13.09998082862170 15.40458380319925  
O 10.2780407859903 7.346594971819132 12.5216312917612  
O 20.20732548938664 8.45657849089988 19.5936744560938  
O 11.41360046057758 15.91670617025461 19.84137966258047  
O 10.19668100407699 13.99992358781674 19.66798915130165  
O 17.72981017879167 7.83557253430273 14.13009673782645  
O 17.89983396295439 8.97451622117065 16.08584344647206  
O 14.69518263414499 19.36694190278439 16.17580099701808  
O 14.76046947863244 18.21335373915308 8.21180214745007  
O 16.32282512711260 16.65936462744395 19.44908479063572  
O 17.57272239928316 14.77435279852600 19.19678044808157  
O 11.55091768053144 19.37464291839918 10.79908792593279  
O 12.63029544093472 20.23270065471718 12.60462484060401  
H 13.33923750161566 14.01400991296121 6.89999162602102  
H 9.59204236170844 12.6518328592260 17.50278913805296  
H 7.00792243983412 13.74204758766940 12.49383770096024  
H 11.63026322549891 7.26905448412328 14.83225574073307  
H 7.55868543629344 14.67988744449002 13.90488846053747  
H 8.7529058752312 16.84195028125376 13.36102640554985  
H 7.84471785018036 12.61007908299238 11.74687944042973  
H 9.59204236170844 12.6518328592260 17.50278913805296  
H 10.5374908727557 16.51879832398312 8.18814492066772  
H 9.28118285412725 14.20001760781643 12.5152252304251  
H 9.59322164996570 12.12661531373775 9.64735072619786  
H 10.59672149991643 15.29490851484825 17.52101007179673  
H 10.66077402057302 16.1380453685222 10.10310759736568  
H 9.93209618103417 19.10683857242274 12.8385315524075  
H 12.05626171080369 17.37401082376658 17.63609304833537  
H 11.10974389441252 12.04914055652386 7.95408557057172  
H 9.41384033782895 10.5552406573959 11.69572905682559  
H 10.94948369081006 10.45362683014189 9.51634526779329  
H 10.0958564019040 9.21485836222104 14.60643925651402  
H 11.20223464881247 10.20440621619407 17.39089384344142  
H 11.1052626131757095 14.70311471567037 8.0712958055729  
H 12.58112629157620 14.02209822319629 18.8249832275947  
H 11.4767989663247 17.52435861666560 8.58848206407404  
H 13.60128038753651 16.85629429661711 18.66977954337434  
H 14.50358338528500 18.64580505211525 12.76220843470963  
H 15.73809214945529 16.9524274601339 10.0186566462262  
H 15.12463409561120 17.088364409563079 12.0068344751259  
H 14.02673994506802 19.1715889597769 14.69771902437584  
H 12.63354456948759 9.37808247135808 10.68937922048185  
H 12.89595533462695 7.97025321672746 12.66888370134106  
H 14.52756145362715 8.79153229046125 15.16708527897857  
H 14.03308862547235 11.99455612393985 18.74703847234495  
H 15.7661880101179 15.56394613596659 7.98511789088232  
H 16.69203542540925 12.4622190877657 18.5086741356389  
H 17.46975874472735 15.03545038264244 12.01594232547782  
H 14.36677214244166 17.57832973760405 18.55619703647787  
H 15.57451166282554 8.04646832212747 12.8771582135612  
H 16.5794275097978 10.92338167827268 9.19915649879745  
H 15.3437843868893 9.7336525743279 10.6000954380233  
H 15.1558677374690 10.48318986436169 11.96234466473176  
H 17.02032836790382 11.07494617487667 17.12847289114896

H 17.96716106206414 10.30594610350895 14.14792377063657  
H 17.78610842296879 11.84754274749125 10.22176935545700  
H 18.84235515160910 12.60823278765018 11.8951666884941  
H 18.23025239790610 13.60181350780433 13.70808990314339  
H 18.11799967218583 11.5974090247068 15.93016883436392  
H 8.61260772017019 11.76315265233954 14.6980177452628  
H 11.440484295180789 13.653569492053 14.32501136257573  
H 11.29819425126176 11.74460458391235 18.75321917784124  
H 15.05840820249973 14.52860446488249 18.63829566466666  
H 13.56876753221011 7.46636426837306 14.26808185240350  
H 15.81948447772674 12.63240746193444 7.71873392951273  
H 17.19278436684532 15.08663364961385 9.99497197791474  
H 16.63988116379462 11.3021913428563 15.79957762483253  
H 18.05573122486119 13.44346335715547 17.10825619432772  
H 12.24783028192621 6.16875482730679 19.60477881581772  
H 13.22339976537712 7.31605243605748 20.5867179766664  
H 15.41239156612543 17.79191142969861 17.24736632164517  
H 8.234066593087526 16.13151215157341 15.07988012542845  
H 12.89209352403612 8.0276262374906 5.84023039426808  
H 14.66588589774574 7.87246391508161 6.1222736444508  
H 14.05498087060393 9.0867810856742 4.98706428421560  
H 13.19261951814746 18.37377772051054 16.45888730654669  
H 7.75391546907424 19.9919119053648 17.38549645599744  
H 8.29584711812093 20.99104112311074 16.44502698390012  
H 9.1869037463731356 20.513376930851 17.83464073162692  
H 9.13661634606839 14.25458220676029 15.59708139679427  
H 18.59276882090722 19.27564446079906 13.35152963657879  
H 19.54420162125418 18.64046718548062 14.70996646812448  
H 18.47847886851021 20.07952508338857 14.93734736314377  
H 10.26501403925498 16.52621364623243 15.19052379203311  
H 21.12936902669441 13.86352943272081 7.98099571908814  
H 20.28678023916444 15.318393963896 7.39967312718615  
H 20.05366954724912 13.77714924161174 6.5442882315133  
H 10.05126516185081 17.59195702860754 11.99027134952011  
H 6.50459816538275 14.92839347012219 8.13942789881697  
H 7.19850484784012 16.55793367036967 8.3342298719416  
H 6.3072769873659 15.8340591062999 9.6888807168040  
H 18.27210406330911 14.91848289495158 15.437182323960  
H 4.6422401991016 9.95278451481605 13.5113323299503  
H 5.44599846937404 9.28592361875736 14.95369500120436  
H 5.69941550441180 8.49612707806094 13.38317813954158  
H 15.53289077565060 9.92243126021129 16.37004929549446  
H 15.7448438414770 7.96001064981445 20.44367613567525  
H 15.44276478025506 8.8379178700106 21.99395067532448  
H 19.94698877425179 8.876842823065 21.22191136214481  
H 16.86792716996747 9.19323849401088 11.14705875882033  
H 22.36021050169218 12.44854973543169 15.83746613860129  
H 22.61689091143367 12.49684414956525 14.06771316840984  
H 22.26140126509922 10.94693554162449 14.84774879252539  
H 14.20501657031178 8.87223044560128 11.6199064008317  
H 8.72386718949908 9.3810429609398 9.64940229669237  
H 7.97279646729329 6.6955434263998 11.0343028771942  
H 9.28856389978179 5.41923626195156 11.16044427590999  
H 13.50831991474992 12.13540289979839 7.95523659707290  
H 8.98572934841961 14.84725483689843 21.72289567535211  
H 9.91068959039929 16.39340673513940 21.83879705444434  
H 14.63074299529990 14.86692877964551 22.39980273624395  
H 13.02397045737461 17.14754762159957 9.9455801361328  
H 19.18083120820192 7.01832579696667 16.96463221459081  
H 19.96130156122911 6.84379885392509 15.36094967420970  
H 18.50741821298445 5.90164953349995 15.72460368416603  
H 9.79402872048298 10.89359348690959 16.20950452964623  
H 14.80492526609967 20.43185116770447 7.07621936671851  
H 16.0731179588040 20.91289995760117 8.32235602184448  
H 14.37278975848161 21.35887900442010 8.53298089086693  
H 11.47295781483599 7.53296063645922 20.47753592919995  
H 19.04269180711441 15.69439594282807 20.99477572283694  
H 17.54596574559341 16.102404921551761 21.87890282773677  
H 18.34580519042090 17.35511901661100 20.9108809056461  
H 8.22304901074940 12.14835549063094 10.5297011574229  
H 12.40792953346942 22.44522187943441 11.45254592670754  
H 10.79566742124081 22.03647410823911 11.09195628367606  
H 12.8298895663440 21.746083835085775 9.85704925230765  
H 13.50224802224144 9.5336245008466 16.78633242721314  
H 13.2334908561372 16.51537319450932 4.76337495062109  
H 12.939990667645624 14.983090637645624 5.5802704604943  
H 14.09117681420756 14.95484388660899 4.51287642138099  
H 13.85582231230219 10.3214727013052 9.48838972068260

253

./Thermo\_CH3COOH\_16\_H\_1.6.xyz

Ru 15.65100 12.55150 15.36680  
Ru 12.13090 12.88690 11.03470  
Ru 15.28450 11.17450 13.04240  
Ru 14.25520 14.99050 15.73910  
Ru 13.74650 15.32480 11.37420  
Ru 12.76200 12.58130 15.67250  
Ru 14.00730 13.52030 13.40400  
Ru 12.27480 12.94300 11.31360  
Ru 12.48170 11.17180 13.35100  
Ru 12.58650 15.94630 13.73290  
Ru 11.14100 13.60220 13.73500  
Ru 8.40680 13.54630 13.98960  
Ru 9.97700 15.97780 14.00050  
Ru 11.70290 13.89730 13.70820  
Ru 11.40900 18.20950 13.97530  
Ru 10.81530 13.91130 9.30830

Ru 9.63200 12.98450 11.56400  
Ru 10.14550 12.64630 15.99750  
Ru 11.94900 13.24050 18.09030  
Ru 12.24400 16.20250 9.36340  
Ru 11.03430 15.34800 11.60560  
Ru 11.53850 14.96050 16.01200  
Ru 13.22650 15.55200 18.14510  
Ru 12.49400 17.69300 11.67690  
Ru 14.01800 18.29600 13.79560  
Ru 13.05030 17.22800 16.08050  
Ru 11.14350 8.68670 13.49220  
Ru 12.14500 11.67600 8.95130  
Ru 10.96000 10.47300 11.14330  
Ru 11.47180 10.28450 15.62600  
Ru 13.09150 10.93580 17.71690  
Ru 13.55300 13.92000 9.23750  
Ru 14.45150 13.17630 17.60330  
Ru 15.01830 16.09050 9.21230  
Ru 15.26730 15.86930 13.44300  
Ru 15.60750 15.49430 17.86800  
Ru 15.48680 17.69930 11.38410  
Ru 15.66880 17.22250 15.79940  
Ru 14.00200 8.90850 13.15860  
Ru 13.02800 7.96200 15.51990  
Ru 14.79430 11.72150 8.05330  
Ru 13.67150 10.59100 11.01750  
Ru 14.07780 10.31480 15.28510  
Ru 15.83830 10.77500 17.45430  
Ru 16.16870 13.82450 8.80230  
Ru 16.65450 13.46300 13.11470  
Ru 17.10650 13.25450 17.46730  
Ru 16.47200 15.18300 11.14180  
Ru 16.90480 14.90530 15.44870  
Ru 16.45130 8.91650 12.79100  
Ru 16.41730 10.41270 10.52450  
Ru 18.12280 11.03080 12.68180  
Ru 16.89070 10.24300 14.95600  
Ru 17.70130 12.93900 10.74760  
Ru 18.26950 12.55850 15.10990  
C 13.10280 7.00900 19.83070  
C 13.14150 7.96900 18.66410  
C 19.94980 18.17830 15.80570  
C 18.62670 17.45530 15.70820  
C 13.19450 8.86000 5.70950  
C 13.28250 9.88030 6.80860  
C 7.66000 19.00900 16.23180  
C 8.75330 18.32800 15.44140  
C 20.26830 13.59330 7.23060  
C 19.06930 13.44550 8.13230  
C 7.46950 15.62780 6.74410  
C 8.23500 14.95000 7.84390  
C 5.61400 10.10630 14.32700  
C 6.87530 10.92580 14.16920  
C 16.60830 10.15530 21.74900  
C 16.10950 10.83230 20.47760  
C 22.65900 13.77450 15.05560  
C 21.19000 13.63450 14.76400  
C 9.02980 6.54930 10.17610  
C 9.74980 7.62630 10.96080  
C 10.46130 15.44880 21.59870  
C 11.18680 15.09900 20.32320  
C 7.46900 9.74950 18.11260  
C 8.59730 10.33000 17.28120  
C 15.95400 20.01450 7.57610  
C 15.72430 18.87900 8.54310  
C 18.90870 15.20680 20.99550  
C 18.08330 14.91550 19.76570  
C 11.39100 22.09780 11.83570  
C 11.00100 20.65500 12.23690  
C 11.78500 17.01850 5.09310  
C 12.11730 16.27080 6.35800  
O 9.88200 18.91780 15.38000  
O 8.46780 17.20080 14.90370  
O 14.45980 10.23350 7.17960  
O 12.18630 10.30550 7.30760  
O 15.05200 15.23510 15.3510  
O 17.57750 18.11300 16.02220  
O 12.99050 9.20330 18.92850  
O 13.36050 7.43750 17.51490  
O 17.95380 13.91400 7.70200  
O 19.23430 12.88270 9.26430  
O 9.45200 14.71700 7.74150  
O 7.50950 14.67650 8.92110  
O 7.95400 10.28500 13.92430  
O 6.77280 12.18780 14.28080  
O 15.54130 11.93350 20.53690  
O 16.33900 10.11600 19.39990  
O 20.45750 12.89130 15.43530  
O 20.77680 14.35580 13.73140  
O 9.75180 8.79500 10.44370  
O 10.30200 7.25500 12.05460  
O 10.83080 14.02300 19.72590  
O 12.11950 15.88600 19.94330  
O 8.54280 11.60050 17.08560  
O 9.49800 9.53250 16.87220  
O 15.59750 19.16380 9.77470

O 15.64650 17.69950 8.03560  
O 17.25250 15.82380 19.40410  
O 18.26430 13.78680 19.19160  
O 11.96180 19.83280 11.33810  
O 11.40680 20.37670 13.47660  
O 12.79050 15.19800 6.28050  
O 11.81280 16.80550 7.46900  
H 7.12050 14.47150 13.67180  
H 13.83950 19.93570 13.41760  
H 9.84480 7.99850 14.51450  
H 16.74700 18.57330 11.80370  
H 8.55400 15.11800 13.40350  
H 8.08430 13.56900 12.21270  
H 9.99800 17.59350 13.12380  
H 9.38400 14.66100 11.32560  
H 9.33230 13.04600 9.81730  
H 8.50900 13.73500 15.71700  
H 9.46750 16.23830 12.40300  
H 11.43400 15.31050 17.69140  
H 12.92120 17.20950 17.85210  
H 10.91700 17.27080 11.31420  
H 12.31550 17.87680 9.93380  
H 10.17130 18.54180 12.87550  
H 12.69000 18.74600 15.14080  
H 10.00200 9.83120 12.56660  
H 11.68000 9.13450 11.84790  
H 10.70680 10.83950 9.43180  
H 12.05380 11.72600 18.96310  
H 11.51450 10.42580 17.42830  
H 13.58130 17.12730 8.93590  
H 14.61480 16.21280 18.99040  
H 16.91800 17.07730 10.80230  
H 14.13280 19.91100 14.30310  
H 15.88330 17.19650 17.60200  
H 13.32350 12.52280 7.87120  
H 13.82050 8.89980 11.38880  
H 14.92900 9.63900 10.13870  
H 15.05800 9.18400 17.44080  
H 16.73780 15.57100 9.35430  
H 15.72480 12.54550 7.49890  
H 17.37000 11.62000 17.92440  
H 15.19450 18.93680 12.56810  
H 15.27770 7.63180 12.87810  
H 16.67100 9.55050 9.09530  
H 16.54070 8.73520 10.98550  
H 18.32820 9.42680 12.33960  
H 17.17700 9.92400 16.79830  
H 16.96950 8.47280 14.40480  
H 16.56100 11.84750 9.35010  
H 18.12080 10.95400 16.88150  
H 19.65180 10.65700 12.41470  
H 18.55880 12.54850 16.86130  
H 18.10220 14.11030 14.20070  
H 19.14250 12.03700 13.63360  
H 18.49930 10.99000 15.71670  
H 8.74580 11.83770 12.40720  
H 9.74000 10.95100 15.34730  
H 10.52730 12.34730 17.68960  
H 10.50630 15.68400 9.89510  
H 12.08250 14.66300 8.29060  
H 13.33850 13.82270 19.01430  
H 13.84530 18.40150 10.98630  
H 10.79300 12.48750 8.21110  
H 12.22600 9.55500 10.48320  
H 11.59170 8.57920 16.15350  
H 14.83300 14.96950 7.89590  
H 15.49500 18.62650 14.69940  
H 15.83180 13.82350 18.66830  
H 16.29530 17.18600 12.73920  
H 12.56300 8.05930 12.68360  
H 14.44900 9.75350 17.04740  
H 11.84330 7.33280 14.34190  
H 14.60620 11.56780 18.59550  
H 17.49630 15.00600 17.13320  
H 18.21800 14.53250 11.13060  
H 17.01030 15.30510 12.82760  
H 19.79150 14.22580 13.65290  
H 12.41730 6.18100 19.61000  
H 12.79880 7.52600 20.74590  
H 14.10600 6.58100 19.96830  
H 16.51350 16.74300 14.37700  
H 19.79050 19.26250 15.82570  
H 20.59430 17.89330 14.96530  
H 20.45200 17.87280 16.73540  
H 7.75130 14.32480 15.28490  
H 12.19870 8.87700 5.24550  
H 13.37380 7.86030 6.12250  
H 13.96050 9.95050 4.94810  
H 14.40980 18.20880 16.64050  
H 6.69550 18.51900 16.06750  
H 7.60600 20.07080 15.95800  
H 7.91450 18.95800 17.30010  
H 9.97530 14.11150 16.82460  
H 21.01450 12.82300 7.45550  
H 20.72280 14.57900 7.43210  
H 19.96480 13.54980 6.17860

H 18.91330 12.52450 11.91760  
H 7.30180 16.67880 7.02340  
H 6.48670 15.15780 6.61490  
H 8.04580 15.59430 5.81540  
H 14.05980 6.85380 14.66400  
H 4.00830 10.71700 14.74620  
H 5.00850 9.23620 14.96560  
H 5.39550 9.72980 13.34110  
H 11.35400 16.70950 16.05920  
H 17.23600 9.28500 21.53110  
H 15.73650 9.83850 22.33920  
H 17.16520 10.88620 22.34830  
H 18.57500 10.12830 14.00750  
H 23.23880 13.38800 14.20460  
H 22.91530 13.21750 15.96090  
H 22.91930 14.83500 15.17100  
H 15.53120 9.25130 15.30520  
H 8.56450 5.82700 10.85630  
H 9.76700 6.01100 9.56250  
H 8.28430 6.09480 9.59800  
H 9.96180 15.57600 15.74770  
H 10.51580 16.52530 21.79140  
H 10.94850 14.92080 22.43200  
H 9.42000 15.11130 21.54720  
H 13.45850 10.44780 9.29240  
H 7.31230 8.69400 17.86490  
H 6.54850 10.32770 17.97280  
H 7.75430 9.81630 19.17290  
H 8.09400 14.21800 9.59450  
H 16.55280 19.67530 6.72330  
H 16.43450 20.85880 8.08130  
H 14.97750 20.34750 7.19370  
H 14.46080 6.97180 15.44660  
H 19.79150 14.56030 21.03110  
H 18.28880 15.00750 21.88210  
H 19.19550 16.26480 21.01920  
H 9.47980 11.46650 10.74660  
H 12.16000 22.72030 12.31520  
H 10.41570 22.44720 12.19820  
H 11.45850 22.20980 10.74920  
H 17.52050 9.86370 9.35920  
H 11.12130 17.86550 5.29590  
H 11.31380 16.31580 4.39400  
H 12.70570 17.30450 4.61680  
H 9.44100 8.62250 14.10890

106

./Thermo\_CH3COOH\_2-H\_0.8.xyz

Ru 14.55316 13.03935 15.25619  
Ru 14.70224 12.97892 10.88627  
Ru 14.70178 11.48162 13.10767  
Ru 13.12232 15.32851 15.22790  
Ru 13.29459 15.29115 10.87434  
Ru 11.84772 12.90717 15.19222  
Ru 13.26366 13.77186 13.07495  
Ru 11.96867 12.94001 10.85990  
Ru 11.91440 11.39097 12.99821  
Ru 11.95462 16.12160 13.02669  
Ru 10.53499 13.63989 13.01798  
Ru 8.00266 13.71822 12.85498  
Ru 9.20511 15.95300 12.88936  
Ru 9.27395 11.32145 12.96554  
Ru 10.33017 18.03233 12.81905  
Ru 10.73496 13.64479 8.76627  
Ru 9.36897 12.81778 10.82836  
Ru 9.17171 12.88981 15.02672  
Ru 10.47028 13.69483 17.15868  
Ru 12.04336 15.95814 8.79010  
Ru 10.62669 15.24589 10.92192  
Ru 10.40108 15.26301 15.05250  
Ru 11.70954 15.97939 17.22597  
Ru 11.95101 17.50377 10.83259  
Ru 13.01878 18.51560 12.98284  
Ru 11.55843 17.61679 15.07808  
Ru 10.69173 9.11512 13.06339  
Ru 12.10018 11.45010 8.81474  
Ru 10.09218 10.66157 10.86527  
Ru 10.52590 10.61236 15.06468  
Ru 11.68736 11.44936 17.24737  
Ru 13.31922 13.70586 8.81242  
Ru 13.06407 13.78622 17.34035  
Ru 14.61911 15.95834 8.86387  
Ru 14.59351 16.12130 13.09262  
Ru 14.30158 16.08696 17.30220  
Ru 14.47518 17.56857 10.94202  
Ru 14.37618 17.67033 15.13630  
Ru 13.38821 9.17608 13.11185  
Ru 12.22022 8.45140 15.26268  
Ru 14.63752 11.53765 8.82861  
Ru 13.39654 10.65756 10.98888  
Ru 13.21249 10.64146 15.17710  
Ru 14.31864 11.48283 17.27370  
Ru 15.90321 13.82075 8.91402  
Ru 15.92662 13.81593 13.14739  
Ru 15.64412 13.08033 17.34576  
Ru 15.99392 15.31316 11.04563  
Ru 15.90395 15.38680 15.29060

Ru 15.73928 9.15511 12.96589  
Ru 15.99801 10.73985 11.02090  
Ru 17.26124 11.24180 13.28879  
Ru 15.76379 10.37851 15.33288  
Ru 17.25427 13.02259 11.17870  
Ru 17.07301 12.98655 15.38699  
C 15.67870 6.22959 16.91025  
C 15.00535 7.41649 16.26517  
C 18.89109 17.76840 13.07952  
C 17.64735 16.98530 13.38620  
O 16.74401 16.89278 12.46018  
O 17.51257 16.49715 14.54845  
O 15.77557 8.36620 15.88089  
O 13.73070 7.37975 16.17586  
H 7.50635 15.46823 13.01538  
H 10.59120 18.94398 14.32864  
H 11.61024 17.74362 16.87594  
H 10.38932 12.19726 18.20270  
H 7.85339 12.19559 11.87906  
H 7.47615 12.93139 14.34329  
H 8.95180 13.29672 9.19718  
H 10.26412 15.44936 9.05870  
H 9.92489 15.45189 16.95560  
H 11.61073 19.10869 11.89328  
H 14.07205 19.17581 11.75442  
H 12.87702 18.85377 14.87330  
H 9.41501 9.63031 11.88379  
H 10.82789 12.18536 7.73172  
H 11.26093 9.87205 9.40016  
H 10.49958 8.69915 14.94486  
H 13.39908 16.64915 7.74877  
H 13.94159 16.74313 18.32061  
H 13.02595 12.14128 18.39631  
H 14.65474 18.71091 13.77890  
H 14.38395 14.67720 18.47717  
H 15.24311 17.61065 9.33187  
H 14.67103 17.77513 16.88904  
H 10.30878 10.43116 16.85877  
H 12.14602 7.83145 13.58651  
H 15.92539 12.36894 7.80612  
H 14.85332 9.82433 9.97887  
H 15.86339 10.61829 17.09451  
H 17.29664 14.51361 16.13198  
H 17.47900 14.51346 10.17938  
H 17.83730 12.74075 17.16041  
H 17.71819 13.07149 13.67567  
H 17.65547 9.59353 13.23976  
H 17.82372 11.25989 11.58114  
H 17.68853 11.22287 15.06886  
H 15.18687 5.31382 16.72378  
H 15.70792 6.39734 17.99787  
H 16.70986 6.12042 16.55570  
H 15.83380 18.33362 15.25701  
H 19.68510 17.53063 13.79431  
H 18.64924 18.83892 13.16340  
H 19.21991 17.57997 12.05013  
H 9.94206 17.02090 15.29494

124

./Thermo\_CH3COOH\_2-H\_1.2.xyz

Ru 15.08540 13.14200 15.21690  
Ru 14.94130 13.25670 10.81750  
Ru 15.19059 11.71890 12.96180  
Ru 13.46680 15.28010 15.37340  
Ru 13.24130 15.50340 10.99080  
Ru 12.35760 12.81470 15.30590  
Ru 13.62390 13.91030 13.10150  
Ru 12.20160 13.04240 10.93930  
Ru 12.49020 11.45160 12.99840  
Ru 11.96510 16.05810 13.28150  
Ru 10.96520 13.63010 13.18550  
Ru 8.18940 13.33670 13.16390  
Ru 9.23430 15.70440 13.41620  
Ru 9.61960 10.96730 13.12810  
Ru 10.35560 10.82950 13.36410  
Ru 10.69710 13.67410 9.92100  
Ru 9.65010 12.60910 11.07090  
Ru 9.74670 12.53200 15.14100  
Ru 11.02220 13.29960 17.37680  
Ru 11.75720 16.15870 9.05020  
Ru 10.55030 15.19270 11.18380  
Ru 10.76330 14.98200 15.37310  
Ru 12.11660 15.76390 17.40750  
Ru 11.69340 17.60280 11.22160  
Ru 13.08390 18.56170 13.31430  
Ru 11.80090 17.44490 15.43860  
Ru 11.32840 8.90860 13.04240  
Ru 12.26500 11.57610 8.85220  
Ru 11.09520 10.60670 10.95560  
Ru 11.28090 10.45930 15.00320  
Ru 12.49420 11.12980 17.28800  
Ru 13.29430 13.95850 8.79170  
Ru 13.66850 13.55560 17.43080  
Ru 14.32540 16.44250 8.89700  
Ru 14.68060 16.45050 13.22440  
Ru 14.66450 16.02480 17.48520  
Ru 14.25090 17.86480 11.12300

Ru 14.25220 17.71800 15.46880  
Ru 14.07730 9.20420 13.03990  
Ru 12.68810 8.43890 15.23700  
Ru 14.82520 11.90230 8.69060  
Ru 13.83900 10.80610 10.89230  
Ru 13.94710 10.69560 15.09370  
Ru 11.49500 9.58090 17.14720  
Ru 15.90330 14.31980 8.71500  
Ru 16.20810 14.25080 13.04020  
Ru 16.30040 13.92000 17.29170  
Ru 15.88060 15.82800 10.96000  
Ru 16.12630 15.68460 15.30200  
Ru 16.52560 9.58350 12.80860  
Ru 16.44190 11.18950 10.65150  
Ru 17.83780 11.89210 12.77050  
Ru 16.64140 11.04400 14.97080  
Ru 17.46770 13.70460 10.83350  
Ru 17.58670 13.41670 15.08080  
C 12.49670 7.22760 19.43310  
C 12.56500 8.17710 18.26660  
C 10.02260 18.23390 13.42400  
C 17.76360 17.47680 13.75860  
D 17.90640 16.45710 14.55610  
D 16.65740 17.86100 13.29610  
D 12.59180 7.64470 17.09370  
D 12.67090 9.41990 18.50830  
H 6.59180 13.17770 13.24090  
H 11.07840 7.81940 14.38140  
H 7.60970 14.98340 13.55030  
H 8.70590 17.41820 13.61860  
H 8.06810 11.79090 12.29730  
H 9.59380 12.75090 16.09580  
H 10.03160 15.42310 9.41980  
H 8.97880 15.88810 11.64380  
H 9.09820 13.03420 9.57350  
H 10.35020 15.04750 17.18780  
H 11.14780 17.74850 9.48250  
H 11.40900 19.11170 12.30720  
H 11.41800 17.36600 17.21050  
H 10.82680 12.21330 7.98390  
H 10.54320 8.97110 11.39880  
H 11.30980 10.05020 9.34050  
H 9.59530 9.14940 13.30360  
H 11.02870 10.35710 16.00870  
H 11.82490 14.62890 7.85880  
H 12.27020 14.14850 18.50860  
H 12.92520 17.10310 8.02900  
H 13.31180 16.59730 18.51780  
H 14.08510 19.38830 12.12230  
H 14.48360 18.13650 9.24470  
H 17.65920 11.55240 11.00960  
H 14.18440 19.26510 14.51160  
H 13.75080 10.43050 8.97900  
H 12.74780 9.29660 11.82050  
H 14.25570 9.06510 15.76320  
H 13.87500 11.91880 18.22520  
H 14.53090 14.97100 7.79250  
H 16.57370 12.41710 18.13780  
H 17.63990 15.48550 11.02780  
H 14.66830 17.79830 17.19170  
H 15.51960 8.15460 13.12280  
H 16.32370 10.90920 8.89530  
H 15.38950 9.74130 10.97100  
H 18.23360 10.21300 12.47260  
H 16.69600 10.55940 16.70370  
H 17.23680 9.32640 14.33540  
H 17.59940 13.92790 9.04880  
H 18.14260 11.97240 10.91610  
H 18.15510 13.60540 12.53590  
H 18.41180 11.76810 14.47240  
H 7.97010 12.32390 14.49810  
H 10.81160 18.83010 14.89600  
H 11.12400 11.82060 18.31840  
H 14.99990 14.43590 18.48950  
H 12.96380 7.85930 13.52290  
H 15.99670 12.90110 7.60540  
H 16.20950 16.12330 9.17140  
H 16.59290 15.73800 17.11020  
H 17.98120 13.70710 16.75160  
H 12.71810 7.74760 20.36970  
H 13.19360 6.39400 19.27080  
H 11.48360 6.80240 19.48350  
H 16.04040 17.38250 15.68620  
H 9.13300 15.66700 15.19530  
H 18.86380 18.86670 12.54540  
H 19.85180 17.53620 13.25490  
H 19.29150 18.87050 14.28000

141

/Thermo\_CH3COOH\_2-H\_1.6.xyz  
Ru 15.94220 12.93410 15.12530  
Ru 14.89020 12.98720 10.80210  
Ru 14.84680 11.35150 13.01610  
Ru 13.67470 15.25540 15.26780  
Ru 13.43360 15.35710 10.80530  
Ru 12.25180 12.91510 15.29470  
Ru 13.60560 13.75080 13.01780

Ru 12.06900 12.98250 10.93480  
Ru 12.18700 11.43920 13.06140  
Ru 12.21240 16.10370 13.18580  
Ru 10.89040 13.76900 13.15800  
Ru 8.13510 13.83830 13.18550  
Ru 9.47430 16.05060 13.30110  
Ru 9.35090 11.30860 13.17290  
Ru 10.85350 18.23860 13.27310  
Ru 10.71630 13.84160 8.95750  
Ru 9.43600 13.03310 11.12130  
Ru 9.61280 13.01820 15.27790  
Ru 11.04570 13.63230 17.39220  
Ru 12.06600 16.13510 8.92050  
Ru 10.78600 15.34940 11.09950  
Ru 10.97680 15.28560 15.29890  
Ru 12.39840 15.89970 17.39280  
Ru 12.13970 17.65970 11.08550  
Ru 13.55590 18.64170 13.18830  
Ru 12.39410 17.58790 15.37140  
Ru 10.73090 9.08270 13.14380  
Ru 11.99100 11.55410 8.82500  
Ru 10.73840 10.68710 11.02700  
Ru 10.86860 10.70490 15.18270  
Ru 12.22430 11.30360 17.30070  
Ru 13.35470 13.82370 8.74780  
Ru 13.70250 13.59130 17.38830  
Ru 14.66830 16.09710 8.75900  
Ru 14.84730 16.06610 13.04460  
Ru 14.99880 15.90600 17.33980  
Ru 14.83220 17.70150 10.92450  
Ru 15.06840 17.54670 15.26530  
Ru 13.39200 9.02220 13.11910  
Ru 12.21860 8.53570 15.48230  
Ru 14.63750 11.51510 8.73210  
Ru 13.43570 10.60180 10.90240  
Ru 13.56370 10.58120 15.14380  
Ru 14.93480 11.27450 17.32440  
Ru 16.00120 13.79070 8.65900  
Ru 16.25290 13.74840 12.94610  
Ru 16.31640 13.61250 17.21330  
Ru 16.20220 15.36560 10.81580  
Ru 16.42570 15.25980 15.14210  
Ru 16.07200 9.15340 12.95220  
Ru 16.10410 10.59250 10.83070  
Ru 17.65960 11.33580 12.90860  
Ru 16.25990 10.52340 15.06620  
Ru 17.39260 12.95470 10.73720  
Ru 17.56840 12.84830 15.05810  
C 12.26880 7.50230 19.72400  
C 12.27390 8.43450 18.54380  
C 10.20770 18.61970 15.45880  
C 18.00630 17.85000 15.35910  
D 18.07760 16.60730 15.07210  
D 16.92060 18.49050 15.58820  
D 12.13870 9.67590 18.74940  
D 12.42700 7.88150 17.37960  
H 6.52060 13.94720 13.20630  
H 13.92470 20.18990 13.14150  
H 10.03370 7.63460 13.11180  
H 15.59790 19.04270 10.49380  
H 7.75820 15.51690 13.44950  
H 7.70720 12.10220 13.18240  
H 9.15440 17.84010 13.33720  
H 7.82890 13.79590 11.43600  
H 9.07340 13.32400 9.39120  
H 7.87540 13.51960 14.88960  
H 9.30020 16.22230 11.53600  
H 10.59050 15.46160 17.14360  
H 11.97590 17.59010 17.10380  
H 10.61320 18.56360 11.55360  
H 11.79790 17.82690 9.31420  
H 12.16970 19.57750 12.99000  
H 10.91480 18.54380 15.05200  
H 9.04530 9.58730 13.32940  
H 10.14000 8.93030 11.55280  
H 10.55250 10.65420 9.20440  
H 11.04140 12.20230 18.42090  
H 10.69770 10.60510 16.98340  
H 13.32230 16.88060 7.87470  
H 13.78110 16.56020 18.41780  
H 14.84410 17.03680 9.18460  
H 13.12880 19.20410 14.71990  
H 15.06740 17.62390 17.10160  
H 13.30610 12.19630 7.65880  
H 13.69220 8.93370 11.35060  
H 13.47810 10.18050 9.07680  
H 15.09380 10.31390 18.59450  
H 16.52270 15.57320 9.05160  
H 15.93190 12.27110 7.73260  
H 16.31580 12.03980 18.13030  
H 15.26340 18.66950 12.22980  
H 14.83520 7.92360 13.03370  
H 15.92430 10.32820 9.05940  
H 16.33740 8.07650 11.15720  
H 17.85540 9.63020 13.06310  
H 16.21080 10.19320 16.88930



H 16.17220 8.80110 14.74820  
H 17.62450 13.21900 8.95720  
H 17.60320 11.26730 10.18720  
H 19.07170 10.82210 12.37010  
H 18.03570 13.35020 16.68720  
H 17.79250 14.31710 14.10000  
H 18.02900 11.86460 14.05040  
H 17.66120 11.28110 15.86680  
H 8.98510 11.17050 11.38560  
H 9.03420 11.22470 14.93720  
H 9.33880 13.30730 17.02290  
H 10.26970 15.64480 9.31450  
H 11.95240 14.64460 7.78520  
H 12.38250 14.35390 18.49790  
H 13.55270 18.93290 11.29380  
H 10.72870 12.32770 7.89800  
H 12.03710 9.60770 10.50360  
H 10.54240 8.64630 14.85570  
H 14.05700 14.63440 7.63000  
H 14.03230 19.01240 14.16830  
H 15.10810 14.39130 18.40920  
H 16.52620 17.15560 10.87520  
H 11.95970 8.04650 12.50840  
H 14.10080 9.86810 16.87760  
H 12.94140 7.63700 14.22460  
H 13.79550 11.94550 18.43460  
H 16.80780 15.36260 16.98090  
H 17.85700 14.69490 10.90120  
H 16.61800 15.59940 12.54460  
H 18.51530 12.62170 12.11220  
H 11.57710 6.67010 19.53920  
H 11.99230 8.03690 20.63770  
H 13.27430 7.07250 19.84000  
H 15.90250 17.29890 13.80150  
H 19.13810 19.67270 15.20180  
H 20.05670 18.16980 14.80890  
H 19.05950 18.56750 16.49620  
H 9.39600 16.05670 15.08780

114  
./Thermo\_CH3COOH\_3-H\_0.8.xyz  
Ru 14.58920 13.23550 15.69790  
Ru 14.68260 13.24480 11.35540  
Ru 14.70200 11.70810 13.49070  
Ru 13.19300 15.53970 15.71390  
Ru 13.29350 15.52040 11.30000  
Ru 11.89510 13.10730 15.65170  
Ru 13.27910 13.99800 13.56460  
Ru 11.94940 13.23550 11.33660  
Ru 11.89080 11.62700 13.39550  
Ru 12.00420 16.39140 13.55060  
Ru 10.54500 13.87050 13.52060  
Ru 8.00710 13.98650 13.41420  
Ru 9.23160 16.19780 13.40840  
Ru 9.28480 11.58190 13.40530  
Ru 10.32940 18.25590 13.36190  
Ru 10.79010 13.92530 9.26300  
Ru 9.12900 13.14700 11.22320  
Ru 9.22370 13.09190 15.51930  
Ru 10.54500 13.88970 17.64250  
Ru 12.05900 16.21240 9.29260  
Ru 10.65260 15.52320 11.42930  
Ru 10.45010 15.48630 15.56520  
Ru 11.79360 16.14770 17.74390  
Ru 11.98310 17.76830 11.34250  
Ru 12.99270 18.77920 13.51080  
Ru 11.57650 17.90360 15.65760  
Ru 10.66960 9.36460 13.45400  
Ru 12.02740 11.69740 9.17640  
Ru 10.03640 10.97640 11.27450  
Ru 10.54670 10.82260 15.48990  
Ru 11.73120 11.62120 17.67580  
Ru 13.30560 13.90540 9.27160  
Ru 13.13150 13.92330 17.80320  
Ru 14.60840 16.20580 9.35560  
Ru 14.65070 16.33390 13.56990  
Ru 14.38400 16.23440 17.78760  
Ru 14.50980 17.80980 11.44160  
Ru 14.44340 17.84590 15.69990  
Ru 13.37280 9.40470 13.47330  
Ru 12.23400 8.65510 15.62400  
Ru 14.62730 11.80330 9.15070  
Ru 13.36770 10.92710 11.33470  
Ru 13.24810 10.84330 15.56100  
Ru 14.36780 11.62620 17.67860  
Ru 15.89030 14.05440 9.39040  
Ru 15.94940 14.02170 13.59060  
Ru 15.71480 14.01590 17.80440  
Ru 16.00860 15.64930 11.49650  
Ru 15.96730 15.55870 15.77940  
Ru 15.71780 9.37860 13.33250  
Ru 15.96400 10.96920 11.40360  
Ru 17.26730 11.46780 13.65170  
Ru 15.78530 10.58260 15.69540  
Ru 17.25980 13.25420 11.59700  
Ru 17.11820 13.86720 15.79660  
C 15.70820 6.42240 17.24630

C 15.03120 7.61230 16.60200  
C 18.98290 17.77300 13.42540  
C 17.70070 17.11460 13.84240  
C 13.42980 9.27080 5.82230  
C 13.39790 10.12520 7.05710  
O 12.25720 10.49070 7.50020  
O 14.51330 10.47200 7.58270  
O 16.71620 17.11930 12.99450  
O 17.61530 16.61140 15.00270  
O 15.80500 8.55910 16.21900  
O 13.75620 7.58090 16.51380  
H 7.52710 15.76140 13.48700  
H 10.28810 18.99560 14.95140  
H 11.30300 17.88350 17.41290  
H 10.43870 12.36100 18.64460  
H 7.79570 12.57160 12.33040  
H 7.51820 13.14860 14.89490  
H 8.92670 13.59630 9.66950  
H 10.25330 15.72920 9.60550  
H 9.99840 15.63680 17.46420  
H 11.62460 19.34650 12.38610  
H 14.16040 19.34520 12.30290  
H 12.25180 19.43400 14.95900  
H 9.40710 9.88600 12.27740  
H 10.60830 12.47600 8.27710  
H 11.18180 10.83580 9.97390  
H 10.51250 8.91080 15.32780  
H 13.40440 16.92210 8.24630  
H 13.11230 16.95320 18.78440  
H 13.08340 12.26910 18.82940  
H 14.46150 19.11880 14.46730  
H 14.44260 14.79170 18.94590  
H 15.23930 17.83400 9.79220  
H 15.12050 17.83430 17.30820  
H 10.37340 10.56960 17.27180  
H 12.14490 8.05670 13.94900  
H 16.04150 12.64090 8.29390  
H 14.75710 9.88100 10.67720  
H 15.92080 10.79680 17.46560  
H 17.38530 14.65090 16.56140  
H 17.47580 14.77330 10.60860  
H 17.10020 12.88290 17.56830  
H 17.73900 13.28170 14.07420  
H 17.64230 9.81530 13.57000  
H 17.79520 11.48320 11.91540  
H 17.75490 11.40760 15.38630  
H 15.12000 5.51050 17.06880  
H 15.74020 6.59560 18.33270  
H 16.72790 6.31150 16.88400  
H 15.93760 18.33670 15.41090  
H 19.78720 17.53620 14.13800  
H 18.82710 18.86200 13.40530  
H 19.25260 17.45980 12.40850  
H 9.98300 17.19410 15.84270  
H 14.34780 8.67460 5.79040  
H 13.41740 9.93110 4.94170  
H 12.54230 8.63520 5.77700  
H 12.93980 18.40820 16.58130

132  
./Thermo\_CH3COOH\_3-H\_1.2.xyz  
Ru 15.08980 13.25060 15.62040  
Ru 14.93940 13.46150 11.24450  
Ru 15.20910 11.86980 13.32740  
Ru 13.44360 15.40220 15.83960  
Ru 13.24730 15.66900 11.45340  
Ru 12.35900 12.85650 15.67410  
Ru 13.60880 14.01510 13.55680  
Ru 12.20270 13.21510 11.37360  
Ru 12.49970 11.54510 13.35710  
Ru 11.95400 16.18070 13.76140  
Ru 10.94710 13.71320 13.60660  
Ru 8.17720 13.39970 13.58250  
Ru 9.21890 15.77790 13.87620  
Ru 9.68110 11.05970 13.47580  
Ru 10.25190 18.06040 13.82080  
Ru 17.70150 13.86000 9.44890  
Ru 9.65570 12.75620 11.59260  
Ru 9.74540 12.56260 15.54140  
Ru 11.03000 13.28470 17.78780  
Ru 11.75900 16.32540 9.50380  
Ru 10.57620 15.33130 11.64580  
Ru 10.74110 15.01750 15.83930  
Ru 12.07870 15.76410 17.94160  
Ru 11.68450 17.75020 11.67850  
Ru 12.93080 18.65380 13.84010  
Ru 11.69180 17.47630 15.95470  
Ru 11.35570 9.02660 13.33420  
Ru 12.20320 11.73950 9.15490  
Ru 11.10430 10.77370 11.29830  
Ru 11.29570 10.53970 15.35800  
Ru 12.52940 11.14460 17.63360  
Ru 13.32180 14.12400 9.22400  
Ru 13.65610 13.60010 17.83940  
Ru 14.31970 16.62290 9.30290  
Ru 14.70660 16.55580 13.69310  
Ru 14.65640 16.04210 17.96930

Ru 14.23360 18.01500 11.59170  
Ru 14.34100 17.82850 15.94100  
Ru 14.10400 9.34120 13.31180  
Ru 12.76450 8.50470 15.50810  
Ru 14.89100 12.07970 8.99250  
Ru 13.86610 11.01930 11.23250  
Ru 13.99520 10.75930 15.43250  
Ru 15.29900 11.55740 17.52440  
Ru 15.93240 14.54060 9.18320  
Ru 16.21160 14.37400 13.47780  
Ru 16.29290 13.96890 17.71950  
Ru 15.90330 16.09140 11.41980  
Ru 16.06070 15.72510 15.74750  
Ru 16.55780 9.73470 13.18650  
Ru 16.47540 11.42620 11.00260  
Ru 17.84890 12.04470 13.15890  
Ru 16.64930 11.10780 15.31210  
Ru 17.49110 13.91110 11.28040  
Ru 17.53700 13.51760 15.43470  
C 12.61280 7.19840 19.68180  
C 12.66030 8.17300 18.53430  
C 18.90140 18.51770 14.13410  
C 17.67260 17.68200 14.37770  
C 13.56240 10.45960 5.15820  
C 13.57480 10.96150 6.57610  
O 14.78910 11.27660 7.08090  
O 12.45510 11.06460 7.18650  
O 17.77110 16.77120 15.29360  
O 16.62530 17.90940 13.71020  
O 12.57230 7.66980 17.35190  
D 12.77610 9.41800 18.80400  
H 6.58310 13.22150 13.68780  
H 11.16590 7.93730 14.71400  
H 7.60180 15.01750 14.03440  
H 8.60600 17.45840 14.10780  
H 8.10950 11.85770 12.68680  
H 9.41270 12.71680 17.30960  
H 10.04080 15.55700 9.04060  
H 8.92780 15.89830 12.12790  
H 9.10360 13.22330 9.96320  
H 10.33070 15.03890 17.64920  
H 11.11480 17.91210 9.97560  
H 11.41880 19.23220 12.93820  
H 11.40400 17.38030 17.75930  
H 10.75490 12.37060 8.47980  
H 10.57640 9.11740 11.69950  
H 11.31190 10.18520 9.69610  
H 9.61500 9.23070 13.58780  
H 11.07410 10.35460 17.16150  
H 11.85030 14.79610 8.29610  
H 12.26200 14.12460 18.94090  
H 12.93300 17.27630 8.48370  
H 13.31860 16.60860 18.98290  
H 13.83860 19.49700 12.59690  
H 14.42480 18.32050 9.82660  
H 16.06200 17.74330 11.45620  
H 14.56870 18.93430 14.63040  
H 13.79400 10.63670 9.43260  
H 12.73480 9.41190 12.14280  
H 14.34590 9.15150 16.08040  
H 13.89690 11.94850 18.68940  
H 14.54650 15.16710 8.15670  
H 16.57370 12.43660 18.53570  
H 17.65640 15.70280 11.49230  
H 14.68670 17.78120 17.69150  
H 15.56040 8.30940 13.43640  
H 16.42820 11.09190 9.28140  
H 15.43100 9.94130 11.35790  
H 18.26870 10.37710 12.82480  
H 16.73950 10.67250 17.06040  
H 17.24060 9.42670 14.65350  
H 17.63260 14.18860 9.50040  
H 18.18320 12.18360 11.31480  
H 18.19070 13.83550 12.99090  
H 18.40700 11.88080 14.87670  
H 7.94050 12.40030 14.90410  
H 10.55350 18.80180 15.35490  
H 11.15020 11.79660 18.69670  
H 14.95960 14.46880 18.93750  
H 13.04940 7.96570 13.80760  
H 16.12900 13.10960 8.17320  
H 16.23240 16.30700 9.61860  
H 16.51510 15.83040 17.57980  
H 17.98520 13.81710 17.16650  
H 12.87710 7.69340 20.62120  
H 13.28590 6.35440 19.48600  
H 11.59300 6.79440 19.75960  
H 15.71700 18.61310 16.24170  
H 9.13460 15.71680 15.67220  
H 18.83060 19.03140 13.17010  
H 19.79880 17.88850 14.17280  
H 18.98510 19.26820 14.93380  
H 12.60550 9.98200 4.92630  
H 14.39420 9.76420 4.99630  
H 13.78740 11.31460 4.48110  
H 12.76990 18.95690 15.66260

149

./Thermo\_CH3COOH\_3-H\_1.6.xyz  
Ru 15.08270 13.10460 15.44540  
Ru 14.87240 13.15080 11.13840  
Ru 14.85680 11.55280 13.30220  
Ru 13.72140 15.45780 15.63720  
Ru 15.41850 15.53910 11.23500  
Ru 12.27420 13.10650 15.62620  
Ru 13.61640 13.94470 13.38540  
Ru 12.04610 13.19120 11.28200  
Ru 12.16540 11.64980 13.39320  
Ru 12.22700 16.30200 13.53740  
Ru 10.89610 13.98480 13.55090  
Ru 8.12860 14.07370 13.57920  
Ru 9.48510 16.25110 13.71160  
Ru 9.34850 11.60140 13.54050  
Ru 10.87990 18.43660 13.64890  
Ru 10.67980 14.00330 9.33160  
Ru 9.40730 13.26130 11.50910  
Ru 9.63820 13.23110 15.64720  
Ru 11.09540 13.78580 17.75000  
Ru 12.03630 16.28850 9.27160  
Ru 10.77760 15.53830 11.47300  
Ru 11.02760 15.49680 15.69200  
Ru 12.47560 16.03640 17.77690  
Ru 12.14950 17.84450 11.42260  
Ru 13.59500 18.78940 13.50750  
Ru 12.40700 17.79940 15.74920  
Ru 10.72390 9.29310 13.48030  
Ru 11.89490 11.72130 9.10170  
Ru 10.70390 10.90510 11.37330  
Ru 10.06750 10.90930 15.53440  
Ru 12.26500 11.43590 17.69850  
Ru 13.31020 13.99010 9.10780  
Ru 13.75790 13.73050 17.71220  
Ru 14.63590 16.22800 9.08740  
Ru 14.88810 16.26410 13.37670  
Ru 15.11800 16.00120 17.70660  
Ru 14.85110 17.85600 11.23920  
Ru 15.12490 17.74140 15.67050  
Ru 13.38820 9.22570 13.43130  
Ru 12.23510 8.75740 15.80290  
Ru 14.61290 11.61900 8.92500  
Ru 13.40150 10.84060 11.21260  
Ru 13.58400 10.78250 15.43700  
Ru 14.96580 11.38500 17.61260  
Ru 15.95320 13.92410 8.96640  
Ru 16.29290 13.92050 13.26860  
Ru 16.38710 13.72310 17.53250  
Ru 16.18050 15.50730 11.14120  
Ru 16.47730 15.43910 15.49270  
Ru 16.05660 9.32880 13.20510  
Ru 16.07550 10.78660 11.11940  
Ru 17.66690 11.50520 13.17400  
Ru 16.26510 10.68710 15.34760  
Ru 17.38290 13.13320 11.03510  
Ru 17.59240 12.99240 15.34200  
C 12.36060 7.62380 20.01380  
C 12.34470 8.57120 18.84480  
C 19.39190 18.78640 15.85080  
C 18.09650 18.02190 15.73570  
C 12.99650 9.05490 5.76440  
C 13.09770 9.96350 6.96220  
O 14.27360 10.36200 7.28280  
O 12.01660 10.26800 7.57510  
O 18.17800 16.75080 15.63020  
O 17.01190 18.70110 15.76930  
O 12.19020 9.80820 19.06860  
O 12.50100 8.93500 17.67360  
H 6.53080 14.18180 13.66850  
H 13.98010 20.33630 13.51280  
H 10.02620 7.84470 13.44280  
H 15.65080 19.18480 10.83150  
H 7.74120 15.74760 13.78190  
H 7.72040 12.31480 13.60910  
H 9.10700 18.04960 13.79310  
H 7.77980 13.99780 11.85300  
H 9.03990 13.47720 9.77310  
H 7.90510 13.74670 15.29750  
H 9.32720 16.44170 11.94280  
H 10.66720 15.61970 17.54620  
H 11.08020 17.71660 17.41770  
H 10.59240 18.65980 11.91120  
H 11.72370 17.98890 9.68350  
H 12.21620 19.70540 13.18410  
H 10.86830 18.67280 15.42860  
H 9.04070 9.79770 13.69170  
H 10.13420 9.14760 11.89130  
H 10.45470 10.88860 9.56200  
H 11.08320 12.33620 18.74490  
H 10.74410 10.71020 17.32840  
H 13.28160 17.04560 8.23200  
H 13.86960 16.78760 18.69500  
H 14.87620 17.97290 9.50180  
H 13.81290 19.40680 14.95960  
H 15.44860 17.69380 17.43640

H 13.21920 12.48230 8.04190  
H 13.68710 9.19000 11.64160  
H 13.80780 10.18410 9.65410  
H 15.12160 10.45910 18.90760  
H 16.47400 15.69450 9.35450  
H 15.55710 12.46300 7.95000  
H 16.38040 12.11510 18.38620  
H 15.30660 18.69590 12.64000  
H 14.81060 8.11170 13.22410  
H 16.90880 10.63650 9.28930  
H 16.29880 9.03680 11.42790  
H 17.84430 9.80350 13.37200  
H 16.20840 10.27150 17.14520  
H 16.15060 8.97880 15.01750  
H 17.58190 13.34600 9.24560  
H 17.63100 11.41660 10.57840  
H 19.08390 10.97110 12.66610  
H 18.09350 13.46620 16.97160  
H 17.77760 14.52170 14.39980  
H 18.84250 11.94880 14.32140  
H 17.68660 11.43860 16.14760  
H 8.95510 11.39520 11.76000  
H 9.04580 11.42960 15.30140  
H 9.39550 13.45630 17.42750  
H 10.24680 15.83230 9.70510  
H 11.91240 14.81700 8.14520  
H 12.47080 14.50520 18.85460  
H 13.61850 19.10810 11.64600  
H 10.59370 12.53950 8.24630  
H 12.01150 9.86010 10.76800  
H 10.53890 8.85890 15.18990  
H 14.61480 14.77990 7.94950  
H 14.96450 19.13920 14.59040  
H 15.16560 14.47770 18.75300  
H 16.53720 17.28950 11.18940  
H 11.94670 8.25220 12.83830  
H 14.10590 9.99930 17.21800  
H 12.90970 7.84270 14.55240  
H 13.77140 12.08240 18.73870  
H 16.88720 15.46240 17.34240  
H 17.84620 14.88050 11.16080  
H 16.68330 15.74400 12.80720  
H 18.53230 12.79580 12.39730  
H 11.65810 6.79970 19.83440  
H 12.18810 8.14880 20.93950  
H 13.36500 7.18490 20.10040  
H 16.15010 17.02580 14.36040  
H 19.23640 19.84400 15.61560  
H 20.14770 18.34720 15.18940  
H 17.75970 18.70170 16.88370  
H 9.44220 15.27230 15.49320  
H 11.95130 8.92510 5.46700  
H 13.42950 8.07650 6.01610  
H 13.58320 9.47070 4.93560  
H 13.76140 18.45500 16.61940

100

./Thermo\_CH3COOH\_4-H\_0.4.xyz

Ru 15.48217 13.19325 15.72118  
Ru 15.53849 13.07169 11.30970  
Ru 15.66944 11.63980 13.56787  
Ru 14.96747 15.32040 15.73430  
Ru 14.01704 15.37960 11.31413  
Ru 12.77892 13.01273 15.67423  
Ru 14.19194 13.84020 13.50851  
Ru 12.80417 12.98852 11.39228  
Ru 12.89323 11.43685 13.59543  
Ru 12.68702 16.04213 13.49289  
Ru 11.47304 13.69844 13.49952  
Ru 8.86835 13.09756 13.42001  
Ru 10.03880 15.87033 13.61980  
Ru 10.04242 11.26602 13.54814  
Ru 11.22228 18.14665 13.60790  
Ru 11.43256 13.64943 9.31900  
Ru 10.20720 12.78698 11.50771  
Ru 10.14618 12.98418 15.58280  
Ru 11.48022 13.60526 17.69546  
Ru 12.69443 16.06130 9.34272  
Ru 11.30943 15.20595 11.39450  
Ru 11.38563 15.22927 15.61550  
Ru 12.62373 16.00770 17.66301  
Ru 12.56259 17.58012 11.52427  
Ru 13.96402 18.45782 13.59926  
Ru 12.56825 17.52227 15.59231  
Ru 11.71207 9.15628 13.67060  
Ru 12.88110 11.42750 9.45236  
Ru 11.58774 10.62291 11.56849  
Ru 11.41033 10.70444 15.55792  
Ru 12.79508 11.30025 17.62526  
Ru 14.06151 13.83268 9.25436  
Ru 14.10467 13.73218 17.81741  
Ru 15.34809 16.02051 9.28642  
Ru 15.35399 16.31863 13.56592  
Ru 15.22530 16.12153 17.79432  
Ru 15.18454 17.63494 11.43665  
Ru 15.12810 17.65956 15.77699  
Ru 14.38628 9.26415 13.67398

Ru 12.98243 8.94270 16.08719  
Ru 15.40750 11.59887 9.32437  
Ru 14.28320 10.74285 11.48199  
Ru 14.42886 10.74999 15.64009  
Ru 15.55933 11.57618 17.73728  
Ru 16.67868 13.85367 9.20774  
Ru 16.80277 13.98106 13.53764  
Ru 16.76007 13.90371 17.76270  
Ru 16.58099 15.50546 11.47219  
Ru 16.61192 15.49935 15.63170  
Ru 16.77699 9.36372 13.45384  
Ru 16.87842 18.84925 11.42682  
Ru 18.25978 11.86436 13.35984  
Ru 16.94383 10.88482 15.62835  
Ru 18.12034 13.25982 11.43998  
Ru 18.03695 13.10702 15.70167  
C 5.72778 10.73308 13.99698  
C 7.06954 11.39198 13.83012  
C 14.51119 12.20004 21.93638  
C 14.65735 12.37278 20.44874  
C 20.83638 15.10941 8.59114  
C 19.57585 14.57018 9.20602  
C 7.83427 16.04739 8.80417  
C 9.16189 15.53227 9.28755  
O 7.10006 12.67383 13.83617  
O 8.09946 10.62805 13.66770  
O 14.24855 13.46947 19.93276  
O 15.17087 11.40530 19.77911  
O 18.50031 14.60741 8.52390  
O 19.64493 14.11575 10.41138  
O 9.68431 16.10145 10.30947  
O 9.69169 14.54069 8.65628  
H 9.51937 17.65946 13.65422  
H 12.71886 14.56019 8.16256  
H 8.69385 13.56342 11.39476  
H 10.08089 11.45896 16.51875  
H 13.82193 19.01833 11.87215  
H 14.89417 19.25053 14.91206  
H 11.89537 9.98832 9.90774  
H 11.69894 12.20481 18.81374  
H 12.81143 9.42697 17.80128  
H 16.62911 17.19929 10.46992  
H 13.10196 8.01682 14.45353  
H 16.55113 12.43904 8.13372  
H 16.72651 10.39271 9.88614  
H 17.22384 12.21132 18.16765  
H 17.10058 15.71933 17.50983  
H 19.37553 12.34250 14.71062  
H 17.66048 9.31191 15.00021  
H 5.84217 9.67992 14.27195  
H 5.18415 10.70301 13.04214  
H 5.13610 11.26968 14.74825  
H 15.15215 11.39039 22.29959  
H 13.46264 11.95319 22.16049  
H 14.74632 13.14079 22.44852  
H 21.71796 14.73954 9.12441  
H 20.81941 16.20791 8.65750  
H 20.88243 14.84082 7.52918  
H 7.53798 15.54892 7.87617  
H 7.88313 17.13414 8.65694  
H 7.08038 15.85684 9.58162

122

./Thermo\_CH3COOH\_4-H\_0.8.xyz

Ru 14.89160 12.95660 15.57530  
Ru 15.04900 12.92390 11.21010  
Ru 15.04220 11.41610 13.37700  
Ru 13.56260 15.26610 15.52490  
Ru 13.66930 15.20170 11.20220  
Ru 12.13840 12.88570 15.50000  
Ru 13.60770 13.70660 13.41620  
Ru 12.29850 12.96020 11.18070  
Ru 12.22970 11.35260 13.23220  
Ru 12.37410 16.14000 13.35800  
Ru 10.89040 13.63920 13.29270  
Ru 8.37040 13.70920 13.08580  
Ru 9.53670 15.91780 13.40560  
Ru 9.61550 11.33550 13.21400  
Ru 10.80110 18.13410 12.92820  
Ru 11.10780 13.67190 9.06300  
Ru 9.70950 12.84910 11.03980  
Ru 9.51210 12.06810 15.27960  
Ru 10.77080 13.66890 17.45910  
Ru 12.45920 15.88950 9.09220  
Ru 11.00390 15.28150 11.29270  
Ru 10.84560 15.25340 15.34120  
Ru 12.10060 15.97090 17.50730  
Ru 12.47640 17.45620 11.11960  
Ru 13.40360 18.52400 13.33330  
Ru 11.85540 17.72460 15.40780  
Ru 10.96850 9.09590 13.28540  
Ru 12.40080 11.40320 9.02780  
Ru 11.00300 10.68210 11.10790  
Ru 10.85670 10.57100 15.31430  
Ru 12.07470 11.37790 17.50840  
Ru 13.71570 13.59410 9.11480  
Ru 13.46440 13.68290 17.68370

|    |          |          |          |
|----|----------|----------|----------|
| Ru | 15.03440 | 15.87380 | 9.21120  |
| Ru | 15.01250 | 16.02640 | 13.38960 |
| Ru | 14.74010 | 15.98490 | 17.60390 |
| Ru | 14.93130 | 17.49710 | 11.29800 |
| Ru | 14.77760 | 17.54140 | 15.50420 |
| Ru | 13.67600 | 9.14020  | 13.35210 |
| Ru | 12.49700 | 8.40960  | 15.59140 |
| Ru | 15.01200 | 11.46810 | 9.02690  |
| Ru | 13.70930 | 10.63340 | 11.20310 |
| Ru | 13.51400 | 10.60650 | 15.40560 |
| Ru | 14.68020 | 11.38060 | 17.54370 |
| Ru | 16.28890 | 13.69470 | 9.25230  |
| Ru | 16.29230 | 13.71870 | 13.47190 |
| Ru | 16.03830 | 13.74230 | 17.67220 |
| Ru | 16.41570 | 15.20970 | 11.32800 |
| Ru | 16.31770 | 15.27190 | 15.59630 |
| Ru | 16.01910 | 9.06790  | 13.27870 |
| Ru | 16.29720 | 10.62000 | 11.31140 |
| Ru | 17.60590 | 11.14490 | 13.53600 |
| Ru | 16.08230 | 10.30310 | 15.61080 |
| Ru | 17.61450 | 12.90550 | 11.50580 |
| Ru | 17.40690 | 12.75200 | 15.67640 |
| C  | 15.96080 | 6.09370  | 17.01000 |
| C  | 15.29790 | 7.30920  | 16.40830 |
| C  | 19.42870 | 17.36160 | 13.22590 |
| C  | 18.11620 | 16.75490 | 13.66150 |
| C  | 13.81240 | 8.84450  | 5.76970  |
| C  | 13.78220 | 9.75510  | 6.96420  |
| C  | 7.52110  | 18.78500 | 15.66460 |
| C  | 8.88080  | 18.43600 | 15.14040 |
| O  | 8.92670  | 18.02100 | 13.88160 |
| O  | 9.09330  | 18.52940 | 15.07800 |
| O  | 12.64520 | 10.16810 | 7.37970  |
| O  | 14.89750 | 10.09640 | 7.49500  |
| O  | 17.15230 | 16.77060 | 12.79260 |
| O  | 17.99710 | 16.27420 | 14.82990 |
| D  | 16.08660 | 8.23900  | 16.00230 |
| D  | 14.02220 | 7.31530  | 16.37100 |
| H  | 7.87640  | 15.30510 | 13.67460 |
| H  | 10.83290 | 19.58360 | 13.61020 |
| H  | 11.82440 | 17.67370 | 17.20260 |
| H  | 10.77060 | 12.17100 | 18.46100 |
| H  | 8.21850  | 12.16080 | 12.11220 |
| H  | 7.00600  | 12.06970 | 14.49500 |
| H  | 9.32070  | 13.29870 | 9.39200  |
| H  | 10.66640 | 15.47650 | 9.42450  |
| H  | 12.01390 | 14.51040 | 18.62220 |
| H  | 12.04550 | 19.06330 | 12.05430 |
| H  | 14.65340 | 19.04320 | 12.19540 |
| H  | 12.55450 | 19.24970 | 14.70500 |
| H  | 9.77860  | 9.54720  | 12.04170 |
| H  | 11.08780 | 12.26390 | 8.02560  |
| H  | 11.52170 | 9.76470  | 9.78150  |
| H  | 10.78190 | 8.66310  | 15.16310 |
| H  | 13.81000 | 16.56160 | 8.06960  |
| H  | 13.45250 | 16.78790 | 18.50040 |
| H  | 13.39050 | 12.05220 | 19.08750 |
| H  | 14.80300 | 18.90300 | 14.34610 |
| H  | 14.75740 | 14.52360 | 18.79390 |
| H  | 15.69380 | 17.49740 | 9.67460  |
| H  | 15.38970 | 17.62010 | 17.14160 |
| H  | 10.66990 | 10.39580 | 17.10660 |
| H  | 12.47750 | 7.76790  | 13.87150 |
| H  | 16.48970 | 12.23610 | 8.22160  |
| H  | 15.08810 | 9.56090  | 10.54840 |
| H  | 16.19700 | 10.45740 | 17.38410 |
| H  | 17.67610 | 14.34370 | 16.46760 |
| H  | 17.90070 | 14.38800 | 10.50420 |
| H  | 17.37060 | 12.57000 | 17.46560 |
| H  | 18.09110 | 12.93520 | 13.98800 |
| H  | 17.96930 | 9.49330  | 13.46210 |
| H  | 18.14480 | 11.12290 | 11.82050 |
| H  | 18.01520 | 11.07180 | 15.30760 |
| H  | 15.33650 | 5.20410  | 16.87310 |
| H  | 16.00070 | 6.25590  | 18.09000 |
| H  | 16.09560 | 5.94470  | 16.59190 |
| H  | 16.28720 | 17.97480 | 15.20040 |
| H  | 20.18030 | 17.22160 | 14.03950 |
| H  | 19.28290 | 18.43490 | 13.06930 |
| H  | 19.76890 | 16.90810 | 12.31550 |
| H  | 10.33910 | 15.49520 | 17.19590 |
| H  | 14.70530 | 5.79400  | 5.79400  |
| H  | 13.85400 | 9.46170  | 4.85940  |
| H  | 12.90090 | 8.23820  | 5.72770  |
| H  | 13.28270 | 18.16210 | 16.26270 |
| H  | 7.60320  | 19.32120 | 16.61490 |
| H  | 6.95550  | 17.85410 | 15.82420 |
| H  | 6.97090  | 19.38120 | 14.92600 |
| H  | 9.14730  | 13.14610 | 17.03440 |

140  
./Thermo\_CH3COOH\_4-H\_1.2.xyz  
Ru 15.08964 13.25057 15.62036  
Ru 14.93929 13.46158 11.24457  
Ru 15.20809 11.06074 13.32735  
Ru 13.44356 15.40222 15.83952  
Ru 13.24724 15.66889 11.45330

|    |          |          |          |
|----|----------|----------|----------|
| Ru | 12.35895 | 12.85641 | 15.67405 |
| Ru | 13.60890 | 14.01521 | 13.55688 |
| Ru | 12.20256 | 13.21505 | 11.37355 |
| Ru | 12.49960 | 11.54517 | 13.35704 |
| Ru | 11.95402 | 16.18079 | 13.76137 |
| Ru | 10.94714 | 13.71325 | 13.60647 |
| Ru | 9.17719  | 13.30952 | 13.58241 |
| Ru | 9.21900  | 15.77791 | 13.87614 |
| Ru | 9.68114  | 11.09596 | 13.47590 |
| Ru | 10.25177 | 18.06037 | 13.82094 |
| Ru | 10.70141 | 13.85993 | 9.44878  |
| Ru | 9.65574  | 12.75609 | 11.59246 |
| Ru | 9.74549  | 12.56259 | 15.54135 |
| Ru | 11.02998 | 13.28463 | 17.78790 |
| Ru | 11.75916 | 16.32535 | 9.50365  |
| Ru | 10.57604 | 15.33113 | 11.64571 |
| Ru | 10.74126 | 15.01741 | 15.83934 |
| Ru | 12.07885 | 15.76419 | 17.94144 |
| Ru | 11.68446 | 17.75020 | 11.67847 |
| Ru | 12.93079 | 16.65383 | 13.84611 |
| Ru | 11.69179 | 17.47637 | 15.95463 |
| Ru | 11.35564 | 9.02666  | 13.33405 |
| Ru | 12.28233 | 11.73942 | 9.15490  |
| Ru | 11.10436 | 10.77360 | 11.29819 |
| Ru | 11.29572 | 10.53970 | 15.35795 |
| Ru | 12.52925 | 11.14478 | 17.63943 |
| Ru | 13.32180 | 14.12392 | 9.22410  |
| Ru | 13.65605 | 13.60020 | 17.83941 |
| Ru | 14.31984 | 16.62284 | 9.36305  |
| Ru | 14.70668 | 16.55490 | 13.69309 |
| Ru | 14.65637 | 16.04208 | 17.96919 |
| Ru | 14.23348 | 16.01504 | 11.59170 |
| Ru | 14.34105 | 17.82862 | 15.94105 |
| Ru | 14.10402 | 9.34113  | 13.31170 |
| Ru | 12.76464 | 8.50452  | 15.50818 |
| Ru | 14.80993 | 12.07965 | 8.99253  |
| Ru | 13.86611 | 11.01934 | 11.23244 |
| Ru | 13.99514 | 10.75020 | 15.43241 |
| Ru | 15.29911 | 11.55752 | 17.52433 |
| Ru | 15.93240 | 14.54053 | 9.18319  |
| Ru | 16.21157 | 14.37392 | 13.47771 |
| Ru | 16.29277 | 13.96880 | 17.71949 |
| Ru | 15.90317 | 16.00132 | 11.41983 |
| Ru | 16.06064 | 15.72507 | 15.74757 |
| Ru | 16.55771 | 9.73471  | 13.10647 |
| Ru | 16.47545 | 11.42622 | 11.00267 |
| Ru | 17.84884 | 12.04479 | 13.15878 |
| Ru | 16.64925 | 11.10793 | 15.31207 |
| Ru | 17.49127 | 13.91106 | 11.20032 |
| Ru | 17.58703 | 13.51756 | 15.43464 |
| C  | 12.61290 | 7.19850  | 19.68105 |
| C  | 12.66027 | 8.17296  | 18.53424 |
| C  | 18.90133 | 18.51774 | 14.13420 |
| C  | 17.67255 | 17.68186 | 14.37765 |
| C  | 13.56243 | 10.45959 | 5.15826  |
| C  | 13.57486 | 10.96139 | 6.57617  |
| O  | 14.70900 | 11.27665 | 7.08102  |
| O  | 12.45503 | 11.06458 | 7.18642  |
| O  | 17.77104 | 16.77107 | 15.29359 |
| O  | 16.62512 | 17.90932 | 13.71034 |
| O  | 12.57241 | 7.66969  | 17.35187 |
| O  | 12.77617 | 9.40993  | 18.80404 |
| H  | 6.58305  | 13.22139 | 13.68608 |
| H  | 11.16588 | 7.93733  | 14.71408 |
| H  | 7.60186  | 15.01749 | 14.03437 |
| H  | 8.60610  | 17.45847 | 14.10786 |
| H  | 8.10951  | 11.85761 | 12.68691 |
| H  | 9.41270  | 12.71682 | 17.30949 |
| H  | 10.04086 | 15.55692 | 9.84070  |
| H  | 8.92793  | 15.89840 | 12.12806 |
| H  | 9.10346  | 13.22228 | 9.96312  |
| H  | 10.33077 | 15.03891 | 17.64938 |
| H  | 11.11485 | 17.91212 | 9.97554  |
| H  | 11.41881 | 19.23508 | 12.93815 |
| H  | 11.40388 | 17.38016 | 17.75929 |
| H  | 10.75489 | 12.37057 | 8.47869  |
| H  | 10.57636 | 9.11742  | 11.69954 |
| H  | 11.31202 | 10.18506 | 9.69602  |
| H  | 9.61485  | 9.23055  | 13.58795 |
| H  | 11.07415 | 10.35447 | 17.16152 |
| H  | 11.85033 | 14.79620 | 8.29600  |
| H  | 12.26278 | 14.12466 | 18.94089 |
| H  | 12.93297 | 17.27622 | 8.48381  |
| H  | 13.31844 | 16.60849 | 18.98291 |
| H  | 13.83859 | 19.49707 | 12.59688 |
| H  | 14.42472 | 18.32042 | 9.82674  |
| H  | 16.06290 | 17.74322 | 11.45621 |
| H  | 14.56859 | 18.93426 | 14.63839 |
| H  | 13.79404 | 10.63678 | 9.43272  |
| H  | 12.73473 | 9.41188  | 12.14269 |
| H  | 14.34601 | 9.15144  | 16.08036 |
| H  | 13.89693 | 11.94856 | 18.68933 |
| H  | 14.54651 | 15.16719 | 8.15663  |
| H  | 16.57376 | 12.40668 | 18.53568 |
| H  | 17.65646 | 15.70274 | 11.49230 |
| H  | 14.68660 | 17.78135 | 17.69142 |

H 15.56643 8.30927 13.43623  
H 16.42828 11.09198 9.28155  
H 15.43094 9.94120 11.35885  
H 18.26883 10.37706 12.82482  
H 16.73950 10.67249 17.06043  
H 17.24053 9.42669 14.65347  
H 17.63267 14.18951 9.59038  
H 18.18305 12.18350 11.31480  
H 18.19076 13.83555 12.99095  
H 18.40711 11.88078 14.87679  
H 7.94844 12.40039 14.90420  
H 10.55337 18.98188 15.35486  
H 11.15022 11.79074 18.69666  
H 14.95964 14.46888 18.93753  
H 13.04938 7.96574 13.80769  
H 16.12893 13.10989 8.17321  
H 16.23233 16.30693 9.61869  
H 16.51519 15.83945 17.57979  
H 17.99525 13.81716 17.16648  
H 12.87704 7.69333 20.62124  
H 13.28580 6.35429 19.48608  
H 11.59306 6.79451 19.75963  
H 15.71686 18.61305 16.24173  
H 9.13451 15.71692 15.67211  
H 18.83063 19.03131 13.17014  
H 19.79890 17.88835 14.17270  
H 18.98500 19.26807 14.93389  
H 12.60544 9.98197 4.92629  
H 14.39432 9.76425 4.99644  
H 13.70747 11.31463 4.48099  
H 12.77062 18.95678 15.66267  
C 8.88671 20.84016 17.03974  
C 9.66471 19.83198 16.24269  
O 9.35908 19.69046 15.00206  
O 10.57117 19.14815 16.83958  
H 9.31903 20.96844 18.03639  
H 7.85073 20.48213 17.13788  
H 8.84922 21.79899 16.50816  
H 9.19268 14.17528 16.05499

157

./Thermo\_CH3COOH\_4-H\_1.6.xyz

Ru 15.38160 12.81560 15.24820  
Ru 15.09110 13.01850 10.95420  
Ru 15.10380 11.34160 13.05580  
Ru 14.03680 15.16870 15.53580  
Ru 13.67580 15.42310 11.17760  
Ru 12.55740 12.84140 15.49600  
Ru 13.86800 13.74480 13.26280  
Ru 12.24590 13.08890 11.18380  
Ru 12.41840 11.46040 13.22660  
Ru 12.48880 15.10260 13.52940  
Ru 11.08300 13.81570 13.47000  
Ru 8.25630 13.72250 13.71270  
Ru 9.79880 16.19170 13.76340  
Ru 9.64680 11.38140 13.44000  
Ru 11.25360 18.30870 13.84660  
Ru 10.85530 13.98430 9.25260  
Ru 9.65030 13.15130 11.44110  
Ru 9.92120 12.91920 15.60640  
Ru 11.46640 13.44310 17.69940  
Ru 12.24480 16.22450 9.21280  
Ru 10.99090 15.47010 11.43070  
Ru 11.30600 15.19570 15.69400  
Ru 12.83800 15.68770 17.73970  
Ru 12.38520 17.75780 11.47800  
Ru 13.90420 18.48630 13.55620  
Ru 12.81880 17.47870 15.79370  
Ru 10.99820 9.07800 13.22190  
Ru 12.05390 11.72440 8.94150  
Ru 10.93340 10.79730 11.21010  
Ru 11.21630 10.57130 15.36500  
Ru 12.62680 11.11220 17.53140  
Ru 13.49350 13.94200 9.00030  
Ru 14.09720 13.36450 17.58820  
Ru 14.94270 16.17000 9.02470  
Ru 15.15560 16.05040 13.29080  
Ru 15.45510 15.64200 17.60560  
Ru 15.13840 17.72490 11.19050  
Ru 15.46400 17.44990 15.64140  
Ru 13.66690 9.02440 13.12420  
Ru 12.57470 8.42000 15.48990  
Ru 14.78410 11.67510 8.71420  
Ru 13.58530 10.74780 10.96450  
Ru 13.87800 10.51050 15.21210  
Ru 15.31950 11.03770 17.38830  
Ru 16.13410 13.86580 8.79840  
Ru 16.55210 13.68430 13.07820  
Ru 16.70900 13.35650 17.33510  
Ru 16.41900 15.38050 11.01460  
Ru 16.76000 15.13740 15.36420  
Ru 16.26050 9.08930 12.91390  
Ru 16.22890 10.61580 10.80970  
Ru 17.91960 11.25270 12.86260  
Ru 16.56600 10.43020 15.07300  
Ru 17.61180 13.00040 10.80910  
Ru 17.91290 12.71770 15.13180

C 12.74430 7.19700 19.67870  
C 12.70970 8.18510 18.54440  
C 19.73510 18.43790 15.79090  
C 18.42430 17.70090 15.66630  
C 13.16680 8.44970 6.22240  
C 13.23020 9.66090 7.18230  
C 7.98040 18.09310 16.69390  
C 8.91510 18.28530 15.68640  
O 9.92360 18.97720 15.30510  
O 8.67650 17.09450 15.28180  
O 14.40800 10.02710 7.50230  
O 12.14240 10.09190 7.62360  
O 18.48100 16.44090 15.46300  
O 17.35340 18.39280 15.79030  
O 12.56310 9.41270 18.81430  
O 12.84040 7.68850 17.35300  
H 6.65710 13.67960 13.64750  
H 13.71060 20.02910 12.84580  
H 10.32890 7.61750 13.11660  
H 15.93680 19.07730 10.86900  
H 8.07000 15.35990 13.38200  
H 7.93880 12.01810 13.43050  
H 9.75110 17.86430 13.08580  
H 8.00040 13.77120 11.97310  
H 9.21620 13.52530 9.73310  
H 8.04630 13.17830 15.31460  
H 9.42410 15.79410 12.09240  
H 11.02870 15.32110 17.54370  
H 12.38760 17.40060 17.51150  
H 10.76630 17.29150 11.20620  
H 12.16730 17.95860 9.72500  
H 11.52170 19.11940 12.31130  
H 12.71130 19.10290 14.74930  
H 9.31470 9.58100 13.46740  
H 10.43040 8.98590 11.62360  
H 10.55030 11.02590 9.43880  
H 11.45150 11.93940 18.62640  
H 11.08130 10.42200 17.14860  
H 13.50380 17.03190 8.21720  
H 14.25110 16.38860 18.66560  
H 15.25740 17.89620 9.48330  
H 14.18880 20.17400 13.61390  
H 15.77310 17.34810 17.39780  
H 13.36960 12.43170 7.83080  
H 13.61040 9.05600 11.34290  
H 14.85970 9.76110 10.13630  
H 15.47340 10.01410 18.60660  
H 16.67490 15.68660 9.26580  
H 16.01020 12.55650 7.64460  
H 16.74160 11.73780 18.17900  
H 13.46590 18.61150 12.64230  
H 14.99090 7.89390 12.70220  
H 16.34960 10.91040 9.04320  
H 16.65330 8.88060 11.20280  
H 18.03220 9.58050 13.28740  
H 16.52020 9.91180 16.82180  
H 16.23260 8.76260 14.73420  
H 17.72930 13.21490 8.98970  
H 17.98740 11.11360 11.00930  
H 19.41060 10.78390 12.52640  
H 18.42670 13.13240 16.75490  
H 18.01660 14.26840 14.19070  
H 19.05280 11.64540 14.06100  
H 18.01390 11.15840 15.89030  
H 9.17700 11.28880 11.70040  
H 9.43380 11.14330 15.26390  
H 9.80180 12.89390 17.39700  
H 10.44280 15.78670 9.68130  
H 12.05770 14.82090 8.05480  
H 12.84230 14.09020 18.78100  
H 13.75810 18.77430 10.86430  
H 10.75570 12.61070 8.08640  
H 12.17030 9.86480 10.32390  
H 10.86780 8.60830 14.95900  
H 14.79820 14.77690 7.84200  
H 15.17450 18.94260 14.67900  
H 15.53720 14.10010 18.60880  
H 16.80640 17.18780 11.19440  
H 12.22640 8.86470 12.53780  
H 14.40610 9.69350 16.93330  
H 13.30610 7.59000 14.19260  
H 14.14840 11.71200 18.57100  
H 17.22380 15.10910 17.18670  
H 18.09380 14.70870 10.95110  
H 16.88980 15.51720 12.72880  
H 18.65130 12.75010 12.24750  
H 12.00720 6.40280 19.50140  
H 12.54720 7.69560 20.63180  
H 13.73570 6.72240 19.70580  
H 16.40390 16.88010 14.24610  
H 19.59150 19.51070 15.62740  
H 20.46470 18.02980 15.08160  
H 20.13040 18.28340 16.80560  
H 7.43800 14.69080 14.67200  
H 12.13600 8.28250 5.89620  
H 13.54290 7.54660 6.72360

H 13.81780 8.64130 5.35950  
H 14.17880 18.32000 16.54600  
H 6.97980 18.45800 16.59870  
H 7.94720 19.98180 16.57570  
H 8.35890 18.67090 17.70300  
H 9.62520 14.63110 15.86420

87

./Thermo\_CH3COOH\_4.xyz  
Ru 14.77814 13.06606 15.76376  
Ru 14.88234 13.14015 11.46801  
Ru 14.97706 11.54149 13.55084  
Ru 13.24617 15.21794 15.72834  
Ru 13.43580 15.27983 11.43620  
Ru 12.01199 12.79740 15.64910  
Ru 13.44418 13.72127 13.61384  
Ru 12.25892 12.92602 11.37710  
Ru 12.28602 11.30502 13.44756  
Ru 11.91703 15.97203 13.53575  
Ru 10.71983 13.46749 13.44404  
Ru 8.20595 13.35026 13.24454  
Ru 9.33763 15.66186 13.42662  
Ru 9.51631 11.09218 13.39434  
Ru 10.27422 17.94176 13.39114  
Ru 10.91156 13.45219 9.31318  
Ru 9.63218 12.61353 11.30208  
Ru 9.42947 12.66087 15.46130  
Ru 10.57925 13.50864 17.58349  
Ru 12.10938 15.94563 9.38274  
Ru 10.67130 15.03562 11.38124  
Ru 10.54360 14.99322 15.54229  
Ru 11.77113 15.82614 17.65964  
Ru 11.00767 17.40862 11.45058  
Ru 12.96832 18.35230 13.53798  
Ru 11.63230 17.43914 15.66669  
Ru 11.12891 8.96717 13.39502  
Ru 12.39792 11.41264 9.20714  
Ru 11.10996 10.54701 11.35304  
Ru 10.93056 10.42942 15.30543  
Ru 12.04172 11.25128 17.61286  
Ru 13.54529 13.73658 9.35759  
Ru 13.20115 13.61939 17.77518  
Ru 14.60871 16.12709 9.40542  
Ru 14.51095 16.26203 13.65251  
Ru 14.26314 16.02365 17.85098  
Ru 14.31961 17.65961 11.53417  
Ru 14.09736 17.56878 15.79604  
Ru 13.85193 9.22209 13.47825  
Ru 12.68089 8.41884 15.41285  
Ru 15.00784 11.59259 9.36043  
Ru 13.72297 10.73080 11.30078  
Ru 13.53695 10.64925 15.61508  
Ru 14.66656 11.50744 17.71959  
Ru 16.10681 14.15102 9.55790  
Ru 16.18929 13.86080 13.69824  
Ru 15.74153 14.02506 17.83923  
Ru 16.07931 15.51009 11.70699  
Ru 15.94141 15.44121 15.75377  
Ru 16.27798 9.35346 13.35833  
Ru 16.34362 10.93797 11.45474  
Ru 17.54754 11.64757 13.75065  
Ru 16.13489 10.68354 15.67972  
Ru 17.43663 13.13350 11.58751  
Ru 17.25267 13.05089 15.81925  
C 15.99661 6.72775 17.81743  
C 15.30005 7.73991 16.93402  
C 19.16262 17.84400 13.85895  
C 17.91132 17.00182 13.81216  
C 14.03912 9.30118 5.78478  
C 13.92302 10.07038 7.06913  
C 8.63209 20.52513 16.48118  
C 9.50206 19.53845 15.75385  
O 9.27610 19.34539 14.50359  
O 10.39757 18.91995 16.42695  
O 12.74470 10.28679 7.53582  
O 15.00115 10.40452 7.62663  
O 17.47039 16.72029 12.64119  
O 17.39098 16.66837 14.93418  
O 15.96187 8.80506 16.68304  
O 14.11158 7.43087 16.54676  
H 15.45788 5.77507 17.82166  
H 16.03703 7.12295 18.04356  
H 17.03187 6.58440 17.45395  
H 10.34185 15.25151 9.47080  
H 19.57910 17.86774 14.87063  
H 18.91721 18.86921 13.54469  
H 19.90035 17.45118 13.14767  
H 13.27836 11.98624 18.87966  
H 14.90940 8.75755 5.74903  
H 14.01990 10.01147 4.94415  
H 13.19155 8.61616 5.67024  
H 17.89359 13.80697 10.00197  
H 9.15103 20.92365 17.35921  
H 7.72615 20.00190 16.82502  
H 8.31996 21.33219 15.00909  
H 7.82157 11.47929 13.46822

128

./Thermo\_CH3COOH\_8-H\_0.2.xyz

Ru 15.23791 13.13202 15.85977  
Ru 15.25658 13.01304 11.47994  
Ru 15.34918 11.56625 13.68103  
Ru 13.81258 15.32971 15.84624  
Ru 13.83677 15.27497 11.45853  
Ru 12.51207 12.97613 15.78604  
Ru 13.94193 13.83000 13.69452  
Ru 12.55850 12.96664 11.53953  
Ru 12.66117 11.40982 13.68075  
Ru 12.46706 16.00624 13.56908  
Ru 11.21111 13.69451 13.61431  
Ru 8.56683 13.76339 13.57892  
Ru 9.75862 15.84148 13.68568  
Ru 9.56608 11.28988 13.68848  
Ru 10.90298 18.10285 13.47257  
Ru 11.16825 13.55472 9.46555  
Ru 9.93362 12.77389 11.65399  
Ru 9.09470 12.98346 15.69129  
Ru 11.22431 13.57737 17.81669  
Ru 12.50747 15.91515 9.44983  
Ru 11.06465 15.17198 11.49760  
Ru 11.12583 15.20893 15.69920  
Ru 12.33431 15.87890 17.80439  
Ru 12.34244 17.50858 11.52494  
Ru 13.65573 18.39452 13.62413  
Ru 12.22810 17.52996 15.73555  
Ru 11.42158 9.14012 13.69511  
Ru 12.55250 11.30075 9.58524  
Ru 11.23861 10.63332 11.74825  
Ru 11.12754 10.69626 15.56746  
Ru 12.46506 11.21525 17.71372  
Ru 13.83828 13.66434 9.41154  
Ru 13.84174 13.72700 17.98034  
Ru 15.15863 15.88350 9.42630  
Ru 15.13068 16.30623 13.74736  
Ru 14.91639 16.05267 17.97681  
Ru 14.92242 17.56189 11.44643  
Ru 14.69870 17.66785 15.98605  
Ru 14.07055 9.20705 13.76105  
Ru 12.71469 8.91654 16.23288  
Ru 15.12478 11.43521 9.40166  
Ru 13.97675 10.66410 11.58698  
Ru 14.10691 10.72410 15.76048  
Ru 15.18936 11.52909 17.87335  
Ru 16.45847 13.70428 9.40019  
Ru 16.62642 13.90112 13.73633  
Ru 16.45577 13.87425 17.92886  
Ru 16.37543 15.35633 11.62533  
Ru 16.42054 15.50310 15.89509  
Ru 16.61330 9.33542 13.85179  
Ru 16.62503 10.85329 11.56692  
Ru 17.97566 11.58254 13.66747  
Ru 16.62590 10.90403 15.78039  
Ru 17.82302 13.14960 11.69189  
Ru 17.83678 13.18323 15.77962  
C 5.29991 10.94068 14.33692  
C 6.65817 11.55342 14.10925  
C 14.15955 12.09978 22.07642  
C 14.34765 12.30885 20.59719  
C 20.71004 14.76857 8.87751  
C 19.40568 14.31401 9.47363  
C 7.63516 16.01708 8.81593  
C 8.92413 15.46693 9.36309  
C 10.06149 21.25638 16.38467  
C 10.57708 20.00445 15.72950  
C 19.13144 18.35529 13.96017  
C 17.92454 17.51194 14.27460  
C 15.90023 5.79105 15.95319  
C 14.97804 6.90670 15.54667  
C 13.64827 9.41554 5.80505  
C 13.68861 10.09440 7.14727  
O 6.76056 12.82692 14.09129  
O 7.63532 10.72748 13.92185  
O 13.97718 13.42488 20.00041  
O 14.85135 11.33987 19.92201  
O 18.35644 14.35600 8.75916  
O 19.42836 13.92511 10.70563  
O 9.38011 15.97496 10.44283  
O 9.48461 14.50455 8.72631  
O 11.26642 19.20045 16.46004  
O 10.32442 19.81422 14.93611  
O 16.98731 17.45797 13.40599  
O 17.88655 16.90718 15.40451  
O 13.92185 7.11023 16.21102  
O 15.32897 7.61565 14.50295  
O 14.83713 10.30293 7.67127  
O 12.57091 10.41154 7.70412  
H 9.21016 17.52227 13.43079  
H 12.50464 14.44082 8.29439  
H 8.26376 13.27928 11.79222  
H 9.95813 11.50212 16.70681  
H 13.61156 18.97071 11.92351  
H 14.28332 19.20703 15.09349  
H 11.37950 10.01448 10.86629  
H 11.51427 12.21064 18.94872

H 12.42757 9.37461 17.93969  
H 15.55839 17.66129 9.78320  
H 12.72485 7.97025 13.54689  
H 16.50631 12.25612 8.43053  
H 16.14735 9.96217 10.16603  
H 16.85338 12.08880 18.25310  
H 16.00016 15.65069 17.06411  
H 19.13368 12.34748 14.91731  
H 17.95369 9.92548 12.75227  
H 5.38765 9.98896 14.85823  
H 4.82879 10.76154 13.35960  
H 4.66359 11.64162 14.89748  
H 14.88903 11.37928 22.46261  
H 13.15012 11.69413 22.24377  
H 14.23338 13.05425 22.60907  
H 21.54563 14.20685 9.30958  
H 20.85642 15.83252 9.11859  
H 20.68967 14.66183 7.78797  
H 7.54375 15.00111 7.74632  
H 7.57014 17.09448 9.00549  
H 6.79974 15.53222 9.34387  
H 9.31676 21.74746 15.75101  
H 10.90435 21.94370 16.55026  
H 9.63531 21.01803 17.36685  
H 19.95154 18.13691 14.65100  
H 18.95863 19.41738 14.04746  
H 19.44562 18.18200 12.92319  
H 16.47919 5.42497 15.09823  
H 15.32616 4.97810 16.41175  
H 16.60279 6.17495 16.70900  
H 12.62236 9.35689 5.42943  
H 14.06500 8.40298 5.90854  
H 14.28301 9.96282 5.09569

132

./Thermo\_CH3COOH\_8-H\_0.3.xyz

Ru 15.18800 13.13370 15.81680  
Ru 15.19770 13.08320 11.50580  
Ru 15.25930 11.56300 13.67030  
Ru 13.80330 15.31800 15.84750  
Ru 13.69980 15.34530 11.47170  
Ru 12.41900 12.99800 15.80620  
Ru 13.85530 13.84700 13.69710  
Ru 12.53350 12.94720 11.56710  
Ru 12.55760 11.39900 13.65910  
Ru 12.43350 16.11800 13.65730  
Ru 11.13130 13.68500 13.61620  
Ru 8.51470 13.78050 13.58630  
Ru 9.67930 15.86750 13.73890  
Ru 9.69700 11.30600 13.66790  
Ru 10.84280 18.13070 13.55560  
Ru 11.09100 13.49050 9.50530  
Ru 9.84450 12.85150 11.59780  
Ru 9.81150 13.00950 15.69910  
Ru 11.19830 13.62550 17.87810  
Ru 12.47550 15.93720 9.39610  
Ru 11.03200 15.22930 11.55670  
Ru 11.04700 15.23330 15.71550  
Ru 12.39150 15.96280 17.82900  
Ru 12.26530 17.52900 11.60800  
Ru 13.59930 18.41430 13.68950  
Ru 12.21830 17.57350 15.80540  
Ru 11.29800 9.18900 13.78990  
Ru 12.54250 11.39130 9.48870  
Ru 11.20100 10.72050 11.63240  
Ru 11.09150 10.71300 15.65410  
Ru 12.43730 11.24930 17.75830  
Ru 13.74400 13.67700 9.42290  
Ru 13.78630 13.70980 17.95850  
Ru 15.01830 15.87200 9.39300  
Ru 15.09180 16.34750 13.76130  
Ru 14.92750 16.04600 17.97040  
Ru 14.88850 17.60830 11.56790  
Ru 14.67430 17.66200 16.02850  
Ru 13.96280 9.15730 13.86790  
Ru 12.64080 8.84050 16.18710  
Ru 15.08750 11.47200 9.37300  
Ru 13.94480 10.67120 11.57550  
Ru 13.97550 10.74900 15.77060  
Ru 15.16930 11.53100 17.84430  
Ru 16.35570 13.82450 9.37980  
Ru 16.56550 13.89650 13.66770  
Ru 16.40730 13.82850 17.90280  
Ru 16.33300 15.47280 11.57700  
Ru 16.40930 15.46530 15.86550  
Ru 16.50330 9.35600 13.45920  
Ru 16.64330 10.96680 11.50400  
Ru 17.80070 11.52800 13.68870  
Ru 16.52630 10.86200 15.75680  
Ru 17.77300 13.14230 11.54950  
Ru 17.76680 13.12630 15.72710  
C 5.37800 10.81230 14.21940  
C 6.71330 11.48330 14.03840  
C 14.08750 12.05970 22.04670  
C 14.24830 12.27100 20.56470  
C 20.60750 14.58230 8.57090  
C 19.32650 14.14330 9.22400

C 7.65100 16.09220 8.81430  
C 8.93180 15.51920 9.35770  
C 10.05050 21.29300 16.46790  
C 10.53880 20.02500 15.82310  
C 19.16470 18.34330 14.09430  
C 17.94230 17.51500 14.39460  
C 15.99480 5.83000 16.02540  
C 15.03880 6.94730 15.66940  
C 13.67000 9.09650 5.97710  
C 13.68550 9.93320 7.22640  
C 6.74830 12.76250 14.07460  
O 7.72980 10.72050 13.83670  
O 13.90730 13.40300 20.08270  
O 14.70180 11.28680 19.87130  
O 18.24330 14.23750 8.56470  
O 19.39030 13.71900 10.43900  
O 9.43250 16.07000 10.40030  
O 9.44220 14.50950 8.75860  
O 11.23600 19.22500 16.54740  
O 10.25880 19.82130 14.59380  
O 16.92330 17.64950 13.64400  
O 17.99180 16.72400 15.40600  
O 14.08980 7.20430 16.46350  
O 15.23930 7.55780 14.53400  
O 14.82350 10.20970 7.74120  
O 12.56500 10.31250 7.72250  
H 9.15250 17.61000 13.48070  
H 12.38050 14.44200 8.31120  
H 8.17270 13.25080 11.79620  
H 9.81450 11.50500 16.65820  
H 13.68680 19.03750 12.02600  
H 14.25280 19.22550 15.14400  
H 11.71700 9.75300 10.33580  
H 11.32480 12.19050 18.91500  
H 12.52750 9.40870 17.92670  
H 16.24500 17.07730 10.48530  
H 12.53700 7.98650 14.49680  
H 16.13720 12.53780 8.22720  
H 16.55680 10.35000 9.88030  
H 16.76300 12.17500 18.50160  
H 16.83950 15.60680 17.73640  
H 19.09100 12.46480 14.68510  
H 17.92680 9.70180 14.40170  
H 5.50530 9.77050 14.55970  
H 4.85630 10.79780 13.25040  
H 4.76100 11.38270 14.92300  
H 14.74050 11.25380 22.39720  
H 13.04270 11.77900 22.24870  
H 14.29400 12.99150 22.58620  
H 21.46670 14.07400 9.02040  
H 20.72580 15.66530 8.72870  
H 20.56600 14.40200 7.49110  
H 7.44280 15.69930 7.81400  
H 7.70470 17.18780 8.79760  
H 6.82830 15.81380 9.40950  
H 9.25290 21.74830 15.87300  
H 10.89170 21.99930 16.53630  
H 9.70650 21.09000 17.48890  
H 19.97550 18.11150 14.79190  
H 18.90770 19.40950 14.16220  
H 19.48880 18.15050 13.06270  
H 16.81480 5.76730 15.30410  
H 15.44150 4.88800 16.04460  
H 16.39030 6.00340 17.03620  
H 12.64800 8.96850 5.60790  
H 14.11150 8.11430 6.19680  
H 14.29500 9.57050 5.20860  
H 17.72700 14.93680 12.61490  
H 14.06930 9.11200 12.27040  
H 13.70680 16.84680 8.48300  
H 10.53230 15.31880 17.54040

136

./Thermo\_CH3COOH\_8-H\_0.4.xyz

Ru 15.14780 13.09850 15.78770  
Ru 15.20450 13.01300 11.45430  
Ru 15.27150 11.51150 13.63360  
Ru 13.78030 15.28300 15.83970  
Ru 13.71400 15.31600 11.40280  
Ru 12.39250 12.97150 15.78300  
Ru 13.84980 13.82700 13.65550  
Ru 12.51250 12.93200 11.52010  
Ru 12.54100 11.36180 13.57070  
Ru 12.47080 16.10930 13.62040  
Ru 11.12880 13.64050 13.56470  
Ru 8.54380 13.76730 13.53740  
Ru 9.70630 15.86130 13.67130  
Ru 9.74530 11.30500 13.57690  
Ru 10.89750 18.11000 13.54520  
Ru 11.08580 13.49180 9.45200  
Ru 9.82680 12.86880 11.50110  
Ru 9.79620 12.92800 15.67100  
Ru 11.14280 13.63520 17.82820  
Ru 12.50200 15.96730 9.31970  
Ru 11.05080 15.20300 11.50920  
Ru 11.06130 15.22600 15.64110  
Ru 12.39170 15.91100 17.84350

Ru 12.32030 17.51100 11.53310  
Ru 13.63400 18.39300 13.61260  
Ru 12.29230 17.56080 15.76220  
Ru 11.30430 9.15030 13.70850  
Ru 12.50950 11.40930 9.40910  
Ru 11.20330 10.69730 11.55050  
Ru 11.13600 10.65750 15.60520  
Ru 12.42150 11.27750 17.74400  
Ru 13.76280 13.63550 9.38390  
Ru 13.76300 13.66000 17.95140  
Ru 15.05980 15.80780 9.33760  
Ru 15.10700 16.28930 13.72280  
Ru 14.92750 16.91300 17.95140  
Ru 14.94880 17.54700 11.53490  
Ru 14.68700 17.63580 15.98950  
Ru 13.93430 9.13000 13.82650  
Ru 12.66420 8.77750 16.15020  
Ru 15.06500 11.43370 9.32720  
Ru 13.91820 10.64150 11.48890  
Ru 13.90150 10.74330 15.71910  
Ru 15.13950 11.49900 17.83700  
Ru 16.38100 13.76430 9.33270  
Ru 16.55430 13.83900 13.64610  
Ru 16.40450 13.76680 17.85450  
Ru 16.35200 15.39330 11.54660  
Ru 16.40980 15.41450 15.81030  
Ru 16.46280 9.29830 13.61000  
Ru 16.59630 10.85200 11.48760  
Ru 17.85680 11.47300 13.67310  
Ru 16.51350 10.83880 15.78070  
Ru 17.77700 13.11100 11.50970  
Ru 17.71830 13.07830 15.76770  
C 5.41950 10.80400 14.19940  
C 6.75500 11.47200 14.00750  
C 14.06330 12.02850 22.03710  
C 14.21630 12.22950 20.55300  
C 20.61430 14.47230 8.47650  
C 19.35030 14.02350 9.15640  
C 7.69130 16.14880 8.76100  
C 8.93980 15.53180 9.33040  
C 9.96730 21.14280 16.56980  
C 10.51000 19.92030 15.88310  
C 19.16730 18.31800 14.88840  
C 17.95300 17.46500 14.24910  
C 16.12750 5.88730 16.01500  
C 15.11170 6.94480 15.65150  
C 13.64030 9.06370 5.92800  
C 13.66430 9.89950 7.17700  
D 6.79700 12.75850 14.09620  
D 7.75800 10.71600 13.74410  
D 13.36600 20.06310 8.96310  
D 14.64100 11.23250 19.85800  
D 18.25780 14.09250 8.49810  
D 19.42900 13.61880 10.36930  
D 9.38330 16.00330 10.43220  
D 9.48330 14.56450 8.68580  
D 11.21650 19.11050 16.58900  
D 10.26200 19.75850 14.64110  
D 16.97180 17.54580 13.54420  
D 17.96720 16.71420 15.39300  
D 14.15650 7.16730 16.43430  
D 15.28580 7.54900 14.49970  
D 14.80400 10.19250 7.67620  
D 12.54550 10.26530 7.69000  
H 9.18980 17.59950 13.47030  
H 12.47600 14.45780 8.28070  
H 8.14300 13.26550 11.79070  
H 9.62530 11.25000 16.29810  
H 13.09900 18.90600 11.95530  
H 14.61850 19.12930 14.98280  
H 11.76250 9.51950 10.51960  
H 11.21300 12.20380 18.85210  
H 12.65350 9.43280 17.87080  
H 16.28080 17.01850 10.44060  
H 12.52780 7.92830 14.51270  
H 16.09650 12.55300 8.14370  
H 16.17930 9.96950 10.08590  
H 16.72880 12.13680 18.51620  
H 16.79180 15.57650 17.66310  
H 19.02350 12.47030 14.69990  
H 17.99650 9.77200 14.57530  
H 5.94700 9.76820 14.53040  
H 4.88950 10.79620 13.23480  
H 4.81100 11.37050 14.91330  
H 14.72200 11.22850 22.39150  
H 13.02130 11.74180 22.24510  
H 14.26550 12.96550 22.56850  
H 21.40930 13.99300 8.92890  
H 20.71000 15.56130 8.60550  
H 20.56500 14.26330 7.40220  
H 7.50580 15.78630 7.74490  
H 7.77950 17.24280 8.76980  
H 6.83930 15.88280 9.40340  
H 9.15330 21.58530 15.90590  
H 10.77750 21.88080 16.66650  
H 9.62880 20.88950 17.58120

H 19.98000 18.06030 14.77480  
H 18.89850 19.37600 14.21890  
H 19.49120 18.18830 13.04760  
H 16.98250 5.89550 15.33190  
H 15.63830 4.90350 15.96820  
H 16.46200 6.03600 17.04060  
H 12.61620 8.93780 5.56400  
H 14.08050 8.08030 6.14430  
H 14.26280 9.53600 5.15660  
H 17.78850 14.78850 12.52320  
H 14.88130 9.16780 12.27360  
H 13.79100 16.75150 8.36710  
H 10.59730 15.39580 17.47100  
H 11.85430 17.56550 9.77910  
H 13.66150 16.86080 18.82610  
H 9.43200 13.23780 17.41220  
H 18.42780 11.35500 11.96570

154

/Thermo\_CH3COOH\_0-H\_0.8.xyz  
Ru 15.22050 12.96980 15.69490  
Ru 15.35250 12.93980 11.41090  
Ru 15.30950 11.39650 13.53950  
Ru 13.93130 15.29630 15.70530  
Ru 13.93370 15.25680 11.34510  
Ru 12.51430 12.39430 15.67020  
Ru 13.93680 13.73630 13.55480  
Ru 12.56480 13.00700 11.36720  
Ru 12.49180 11.41380 13.48460  
Ru 12.76200 16.12650 13.55820  
Ru 11.22680 13.77550 13.48020  
Ru 8.54100 13.68480 13.29690  
Ru 9.71250 15.94500 13.65210  
Ru 9.81800 11.40030 13.48590  
Ru 11.20550 18.08800 13.25950  
Ru 11.27300 13.66000 9.18710  
Ru 9.99000 12.91280 11.42180  
Ru 9.83180 13.07950 15.54410  
Ru 11.20100 13.79000 17.67090  
Ru 12.92970 16.02750 9.17460  
Ru 11.20880 15.47180 11.48710  
Ru 11.17130 15.40620 15.54510  
Ru 12.59230 16.05400 17.71690  
Ru 12.85680 17.56300 11.31360  
Ru 13.05680 18.48770 13.47370  
Ru 12.42680 17.78930 15.61720  
Ru 11.19950 9.15700 13.59330  
Ru 12.58350 11.41250 9.27520  
Ru 11.20500 10.70250 11.41740  
Ru 11.09230 10.67580 15.62050  
Ru 12.46630 11.45050 17.71740  
Ru 13.90580 13.60040 9.29580  
Ru 13.87500 13.71150 17.92340  
Ru 15.46700 15.75780 9.40780  
Ru 15.38230 16.00730 13.56290  
Ru 15.20130 15.98530 17.76590  
Ru 15.35980 17.46300 11.45090  
Ru 15.28300 17.55930 15.67720  
Ru 13.83630 9.17250 13.56370  
Ru 12.72650 8.51730 15.80540  
Ru 15.15200 11.39370 9.23520  
Ru 13.89230 10.66430 11.40360  
Ru 13.78400 10.65430 15.63020  
Ru 15.06000 11.41480 17.72860  
Ru 16.63280 13.55680 9.38340  
Ru 16.58750 13.66200 13.62170  
Ru 16.44550 13.70250 17.83570  
Ru 16.76200 15.17480 11.50890  
Ru 16.70230 15.27850 15.76540  
Ru 16.17400 9.02250 13.38250  
Ru 16.50600 10.59230 11.42180  
Ru 17.83150 11.01150 13.65990  
Ru 16.33930 10.24880 15.73440  
Ru 17.95070 12.80700 11.61580  
Ru 17.72930 12.64780 15.78170  
C 16.13200 6.10970 17.29000  
C 15.40500 8.14370 16.66180  
C 19.85000 17.20950 13.35520  
C 18.53900 16.64630 13.79560  
C 13.84950 8.99430 5.84560  
C 13.84700 9.84350 7.08500  
C 7.12920 18.27200 14.87980  
C 8.42050 18.85950 14.39670  
C 20.91750 13.28030 8.41750  
C 19.63100 13.23830 9.20060  
C 7.87300 16.50030 8.73420  
C 9.08250 15.78470 9.28490  
C 5.51500 10.52230 13.33640  
C 6.81000 11.27350 13.31360  
C 15.41400 12.52180 21.87280  
C 15.20130 12.83150 20.42140  
D 9.19750 17.98070 13.67110  
D 8.79100 20.00900 14.56490  
D 12.72900 10.26880 7.53220  
D 14.97650 10.11700 7.63070  
D 17.54350 16.72130 12.96780  
D 18.44730 16.13330 14.95420



O 16.28580 8.19400 16.16860  
O 14.20980 7.37400 16.68630  
O 18.58680 13.72400 8.64370  
O 19.64730 12.70830 10.36130  
O 9.44830 16.13200 10.46990  
O 9.64450 14.91550 8.53740  
O 7.09480 10.58580 13.43780  
O 6.77950 12.54450 13.18300  
O 16.11050 12.39700 19.58060  
O 14.17630 13.46750 20.05410  
H 8.07480 15.46900 13.61180  
H 11.35380 19.09680 14.71830  
H 12.25700 17.77550 17.40340  
H 11.15350 12.33300 18.65840  
H 8.44680 13.81800 11.50530  
H 8.18650 13.25280 15.05660  
H 9.88750 12.73950 9.60860  
H 11.37280 15.44330 9.75050  
H 12.42350 14.61300 18.82370  
H 12.54200 19.14280 12.41240  
H 15.11750 19.01250 12.31910  
H 13.23250 19.23200 14.95650  
H 10.37100 9.19920 12.02190  
H 11.11760 12.34700 8.15980  
H 11.63730 9.89850 9.96480  
H 11.01590 8.77000 15.46640  
H 14.27400 16.63380 8.24280  
H 13.88450 16.77280 18.74730  
H 13.76350 10.69830 18.73010  
H 15.38430 18.78800 14.43960  
H 16.41500 15.19300 18.82870  
H 16.13250 17.37900 9.81990  
H 16.00050 17.54200 17.29490  
H 11.07600 10.37100 17.38930  
H 12.75850 7.78700 14.22980  
H 16.45150 12.23280 8.22740  
H 15.29830 9.61100 10.60670  
H 16.48730 10.94450 17.49510  
H 17.98950 14.26530 16.57630  
H 18.37420 14.60480 11.36590  
H 17.79370 12.50680 17.54770  
H 18.36320 12.79900 14.04730  
H 18.11390 9.33850 13.65390  
H 18.23280 10.97800 11.92670  
H 18.27900 18.97120 15.43800  
H 15.46750 5.24080 17.23440  
H 16.31950 6.33330 18.35130  
H 17.09680 5.89900 16.81600  
H 16.80830 17.88150 15.33690  
H 20.62650 17.96700 14.12740  
H 19.73900 18.28050 13.13910  
H 20.16930 16.72000 12.42120  
H 10.76880 15.56180 17.38200  
H 14.71750 8.32630 5.84090  
H 13.91850 9.65330 4.96700  
H 12.91650 8.42480 5.77200  
H 13.79630 18.26300 16.52380  
H 6.66900 18.95850 15.59740  
H 7.28480 17.28620 15.33640  
H 6.45100 18.13350 14.02520  
H 9.52500 13.38300 17.28510  
H 21.77330 13.96200 9.06360  
H 21.03320 14.26000 7.93780  
H 20.86950 12.52680 7.61800  
H 10.83580 17.17850 15.90760  
H 7.57200 16.07080 7.77400  
H 8.11380 17.56500 8.60570  
H 7.04900 16.43400 9.45650  
H 9.57980 11.44870 16.15260  
H 4.69230 11.16400 13.00680  
H 5.31950 10.18530 14.36470  
H 5.58630 9.62850 12.70460  
H 12.69720 14.42430 8.16300  
H 14.68530 13.05230 22.49210  
H 16.43850 12.78450 22.16530  
H 15.29950 11.43700 22.02280  
H 12.50450 17.72850 9.58520

172  
./Thermo\_CH3COOH\_8-H\_1.2.xyz

Ru 15.58170 13.28450 15.53030  
Ru 15.28320 13.89700 11.11060  
Ru 15.69000 11.81700 13.25250  
Ru 13.74550 15.32550 15.73050  
Ru 13.47130 15.56130 11.37660  
Ru 12.92550 12.78950 15.55160  
Ru 13.97300 13.90530 13.43190  
Ru 12.54730 12.99550 11.31600  
Ru 13.00970 11.42150 13.38380  
Ru 12.14080 15.98000 13.63930  
Ru 11.35550 13.46170 13.59570  
Ru 8.04180 13.02620 13.15830  
Ru 9.37150 15.10530 13.88110  
Ru 9.76820 10.89250 13.45340  
Ru 10.44180 17.79900 13.76150  
Ru 10.93980 13.49080 9.32830  
Ru 10.00280 12.52780 11.59500

Ru 9.77000 12.67350 15.47050  
Ru 11.50830 13.06300 17.60490  
Ru 11.94800 16.02280 9.23180  
Ru 10.79230 15.04730 11.46680  
Ru 11.08150 14.91100 15.80330  
Ru 12.51030 15.54230 17.91010  
Ru 11.76730 17.50930 11.60820  
Ru 12.97000 18.45600 13.70640  
Ru 11.92400 17.45180 15.96950  
Ru 11.74720 8.96650 13.41080  
Ru 12.61150 11.53230 9.12760  
Ru 11.50330 10.57830 11.43770  
Ru 11.39530 10.66450 15.25730  
Ru 12.90880 10.91380 17.41820  
Ru 13.61100 13.93830 9.19700  
Ru 14.27700 13.57930 17.82770  
Ru 14.44250 16.46400 9.21620  
Ru 14.82230 16.37780 13.47530  
Ru 15.06780 16.12500 17.68810  
Ru 14.38230 17.94550 11.47870  
Ru 14.62050 17.77930 15.69930  
Ru 14.52650 9.20800 13.44690  
Ru 13.19050 8.93850 15.65800  
Ru 15.19150 12.04750 8.88760  
Ru 14.27800 10.87080 11.15240  
Ru 14.76600 10.77400 15.49440  
Ru 16.27730 11.71800 17.48500  
Ru 16.15000 14.41930 8.96380  
Ru 16.50080 14.37680 13.25320  
Ru 16.87850 14.24970 17.47120  
Ru 16.11350 15.96550 11.18830  
Ru 16.44800 15.89330 15.41980  
Ru 17.18300 9.79000 13.21450  
Ru 16.97200 11.27520 10.86050  
Ru 18.20320 12.18180 12.99580  
Ru 17.33350 11.31580 15.23810  
Ru 17.80000 13.96980 11.06590  
Ru 18.29000 13.95150 15.11610  
C 13.46150 7.26200 19.47500  
C 13.38580 8.18730 18.47120  
C 14.19350 9.09250 5.82840  
C 14.08330 10.06980 6.96700  
C 8.59600 20.19380 16.87060  
C 9.49850 19.21200 16.17020  
C 20.72480 16.80750 14.55740  
C 19.23770 17.06750 14.59300  
C 20.29250 15.23680 7.69370  
C 19.09330 14.80650 8.49450  
C 7.32600 15.92650 8.85330  
C 8.59430 15.31130 9.37050  
C 9.81250 9.20580 14.02180  
C 6.99630 10.28430 13.72620  
C 15.16450 11.45650 21.69800  
C 15.24230 11.85670 20.24520  
D 10.62180 18.94130 16.71590  
D 9.07800 18.70530 15.06880  
D 15.17350 10.53250 7.46180  
D 12.91530 10.39600 7.37200  
D 13.39650 7.77500 17.18260  
D 13.34500 9.49000 18.73010  
D 18.50850 16.07680 15.17650  
D 18.71550 18.10000 14.20850  
D 17.93650 14.98250 7.98300  
D 19.29370 14.29580 9.65120  
D 9.05230 15.76650 10.48270  
D 9.15430 14.39830 8.68270  
D 8.10320 9.78730 13.62950  
D 6.61180 11.50750 13.59570  
D 14.52500 12.84700 19.87990  
D 16.02050 11.16630 19.49120  
H 6.86950 13.50670 12.18260  
H 11.46500 7.39000 13.56390  
H 7.70000 14.69430 14.00540  
H 9.00380 16.67030 13.29820  
H 8.06980 12.36000 11.63990  
H 12.07800 12.14480 17.10180  
H 10.85130 16.51780 8.16110  
H 8.84130 14.28680 12.27230  
H 9.80230 12.28780 9.80200  
H 10.78100 14.89150 17.63810  
H 11.29030 17.53530 9.82590  
H 12.80530 18.99780 11.90640  
H 12.09980 17.24030 17.73250  
H 11.21700 12.09800 8.20690  
H 10.93000 8.89380 11.82870  
H 11.66220 10.03900 9.81550  
H 10.49550 8.47300 14.28570  
H 11.75970 9.68180 16.77780  
H 11.94150 14.59850 8.15750  
H 12.58800 13.97150 18.79770  
H 13.03450 17.02300 8.24100  
H 13.75450 16.44400 18.86480  
H 14.65830 18.73730 12.98960  
H 14.47130 18.15150 9.68450  
H 16.18350 17.71000 11.55470  
H 14.21730 19.24220 14.78650

H 13.99230 10.20530 9.65170  
H 14.42750 9.20450 11.64980  
H 14.53300 7.99680 14.64190  
H 14.52650 11.78350 17.68210  
H 14.79050 15.13200 7.99110  
H 17.38900 12.87900 18.36900  
H 17.87650 15.73500 11.36100  
H 15.22700 17.85900 17.40650  
H 16.00050 8.40780 12.98020  
H 17.70580 10.34080 9.78670  
H 15.77500 10.08900 10.48710  
H 18.81530 10.52150 13.24020  
H 17.83550 11.85830 16.96060  
H 17.50030 9.47280 14.87930  
H 17.07400 11.67280 9.22560  
H 18.55350 12.14800 11.14070  
H 18.56420 14.00580 13.33410  
H 18.88900 12.32100 14.87950  
H 6.17500 12.61230 15.08030  
H 11.38450 19.23500 14.08300  
H 11.77250 11.68470 18.65190  
H 15.69600 14.67870 18.72130  
H 13.23980 8.04680 13.03460  
H 16.09550 13.10600 7.76980  
H 16.32200 16.38200 9.46970  
H 16.92650 16.98530 17.24110  
H 18.56550 14.00150 16.89350  
H 13.52050 6.20380 19.23640  
H 13.48950 7.59230 20.50930  
H 16.19600 17.63600 14.90240  
H 8.87830 15.92700 15.16428  
H 13.28080 8.49350 5.74760  
H 15.07800 8.45000 5.96670  
H 14.33030 9.65250 4.89160  
H 13.21050 18.51050 16.52530  
H 7.66700 19.68350 17.16100  
H 8.32300 21.00050 16.17770  
H 9.08400 20.60950 17.75900  
H 8.83030 13.41800 16.53180  
H 21.09900 17.00920 13.54570  
H 20.98470 15.78980 14.86240  
H 21.20630 17.52700 15.23470  
H 10.45150 16.54480 16.12960  
H 21.18100 14.67400 7.99940  
H 20.47590 16.90530 7.88450  
H 20.09980 15.11230 6.62250  
H 10.17950 18.18080 11.99640  
H 6.86200 15.27500 8.10600  
H 7.58030 16.86650 8.37930  
H 6.63400 16.13200 9.67770  
H 19.89100 13.83300 15.05010  
H 4.83000 9.75930 13.89150  
H 5.91880 8.94520 15.05760  
H 5.91630 8.41950 13.36870  
H 15.73380 10.08550 16.75780  
H 15.82030 10.60430 21.89980  
H 14.12550 11.19730 21.94300  
H 15.44980 12.31000 22.32750  
H 17.62680 9.78200 11.44210

189

./Thermo\_CH3COOH\_8-H\_1.6.xyz

Ru 15.57750 12.81670 15.45440  
Ru 15.27450 13.07350 11.08510  
Ru 15.34300 11.37600 13.19290  
Ru 14.16580 15.18880 15.68940  
Ru 13.80930 15.46050 11.35210  
Ru 12.78300 12.84380 15.59060  
Ru 14.05630 13.75400 13.41180  
Ru 12.43950 13.12600 11.30920  
Ru 12.59930 11.46350 13.34160  
Ru 12.59780 16.13500 13.58110  
Ru 11.31350 13.85450 13.57430  
Ru 8.14150 13.86400 13.83490  
Ru 9.95350 16.17200 13.88920  
Ru 9.73780 11.22900 13.49610  
Ru 11.40550 18.36750 13.94280  
Ru 11.01500 14.01400 9.31140  
Ru 9.86850 13.08300 11.55390  
Ru 10.09470 12.85850 15.61720  
Ru 11.63900 13.44050 17.77310  
Ru 12.45700 16.29130 9.22318  
Ru 11.06520 15.48830 11.48420  
Ru 11.45150 15.22500 15.82700  
Ru 12.98770 15.66400 17.90720  
Ru 12.52950 17.81730 11.63420  
Ru 14.01100 18.55020 13.72980  
Ru 12.97780 17.48350 15.97130  
Ru 11.25730 8.98900 13.24520  
Ru 12.26030 11.77720 9.04640  
Ru 11.17450 10.81050 11.30090  
Ru 11.43820 10.54600 15.41620  
Ru 12.76880 11.07150 17.58900  
Ru 13.71700 14.02600 9.17700  
Ru 14.30380 13.38800 17.00710  
Ru 15.08380 9.23260 9.23260  
Ru 15.29100 16.09150 13.45110

Ru 15.61000 15.68780 17.74010  
Ru 15.21430 17.83580 11.37680  
Ru 15.61780 17.49550 15.75240  
Ru 13.95200 9.05600 13.21840  
Ru 12.70200 8.35500 15.54800  
Ru 14.95750 11.72850 8.81350  
Ru 13.86800 10.80120 11.00250  
Ru 14.09730 10.53230 15.34420  
Ru 15.64930 11.03380 17.56920  
Ru 16.31280 13.91700 8.86440  
Ru 16.70850 13.69530 13.20330  
Ru 16.95080 13.46080 17.45770  
Ru 16.67600 15.51200 11.18600  
Ru 16.88650 15.17700 15.48560  
Ru 16.50500 9.14780 12.96700  
Ru 16.49680 10.70700 10.90100  
Ru 18.23100 11.24850 12.93530  
Ru 16.86000 10.50250 15.14290  
Ru 17.87100 13.93000 10.87030  
Ru 18.12300 12.80450 15.25290  
C 12.87000 7.18980 19.75710  
C 12.85100 8.18900 18.63000  
C 19.89880 18.43950 15.93200  
C 18.57550 17.72700 15.78950  
C 13.36180 8.53000 6.25730  
C 13.41850 9.68930 7.29390  
C 7.68050 19.32000 16.03780  
C 8.74930 18.59980 15.25860  
C 20.54730 14.48080 7.69340  
C 19.31430 14.07750 8.46530  
C 7.48400 16.55070 8.98660  
C 8.76560 15.90150 9.44090  
C 5.34830 10.39930 13.92510  
C 6.63150 11.19280 13.81590  
C 15.30480 11.55630 21.96660  
C 15.20630 11.79780 20.47450  
O 9.82950 19.23530 15.00280  
O 8.52250 17.38230 14.93080  
O 14.58500 10.07300 7.60470  
O 12.32100 10.20580 7.61770  
O 18.61130 16.48150 15.50670  
O 17.51650 18.41850 15.97960  
O 12.67600 9.41250 18.91580  
O 13.02170 7.70730 17.44110  
O 18.18480 14.39380 7.95240  
O 10.49630 13.46250 9.57350  
O 9.38150 15.15830 8.60520  
O 9.14550 16.11230 10.64490  
O 7.70780 10.51280 13.73370  
O 6.62570 12.46400 13.82500  
O 14.67400 12.88780 20.09750  
O 15.66430 10.85600 19.72280  
H 7.13750 14.94550 12.94590  
H 13.77930 20.09150 13.03820  
H 10.51050 7.58350 13.03250  
H 16.07080 19.16080 11.10770  
H 8.76500 15.16630 14.70850  
H 8.65780 12.50350 12.77090  
H 10.09670 17.79130 13.03070  
H 7.41050 14.37550 12.31910  
H 9.58580 13.16250 9.80230  
H 8.35350 13.21280 15.42710  
H 9.36850 14.83780 12.87470  
H 11.17880 15.34450 17.64070  
H 12.66830 17.44800 17.68230  
H 10.96530 17.33900 11.24340  
H 12.35600 17.96150 9.82070  
H 11.55080 19.17400 12.41210  
H 12.79700 19.10600 14.99600  
H 9.62700 9.32550 13.45990  
H 10.75120 8.96300 11.62900  
H 10.79100 11.00500 9.51240  
H 11.64030 11.94780 18.71170  
H 11.23230 10.43150 17.24350  
H 13.74270 17.13650 8.35150  
H 14.39630 16.32520 18.80850  
H 15.34500 18.01980 9.67380  
H 14.23380 20.24630 13.82060  
H 15.85500 17.39630 17.54140  
H 13.55400 12.50620 7.95440  
H 13.93080 9.11230 11.41270  
H 15.08800 9.85200 10.25340  
H 16.33380 9.53930 17.82220  
H 16.86950 15.78600 9.49130  
H 16.04580 12.72400 7.65390  
H 17.17900 11.78220 18.05700  
H 15.57600 18.73480 12.79640  
H 15.31580 7.89600 12.82700  
H 16.46250 10.82250 9.12310  
H 16.62670 8.90050 11.21330  
H 18.30400 9.63650 12.48360  
H 16.67880 9.74550 16.85810  
H 16.70650 8.79730 14.77320  
H 17.29280 12.55300 9.20040  
H 18.32030 11.28480 11.02840  
H 19.74280 10.79500 12.72990

H 18.63800 13.23530 16.89690  
H 18.19630 14.31600 14.32570  
H 19.26900 12.20400 13.92870  
H 18.28830 11.23200 16.00090  
H 9.42430 11.19200 11.66230  
H 9.63630 11.11000 15.36780  
H 10.94250 12.75500 17.40310  
H 11.10750 16.99000 8.77210  
H 12.21620 14.92350 8.17910  
H 12.79250 14.13150 18.96210  
H 13.92170 18.93430 11.06200  
H 11.08300 12.59720 8.87740  
H 12.48430 9.96330 10.34510  
H 10.89700 8.77780 14.99890  
H 15.02300 14.93830 7.98040  
H 15.33530 18.99100 14.81920  
H 15.84380 14.25450 18.74110  
H 16.89730 17.29230 11.37730  
H 12.54930 8.19130 12.30670  
H 14.30480 9.94400 17.09530  
H 12.40800 7.68400 14.03040  
H 14.21780 11.73000 18.40310  
H 17.40700 15.19770 17.30480  
H 18.09730 16.25900 11.22290  
H 17.01270 15.61300 12.94400  
H 18.96280 12.84600 12.17550  
H 12.15550 6.38230 19.54970  
H 12.63030 7.67500 20.70740  
H 13.86930 6.73580 19.81510  
H 16.45830 17.14200 14.28260  
H 19.77000 19.52830 15.81530  
H 20.61580 18.05070 15.19990  
H 20.30100 18.23700 16.93560  
H 7.12050 14.69480 14.75030  
H 12.35430 8.42280 5.85360  
H 13.63300 7.61000 6.80370  
H 14.09630 8.67200 5.46490  
H 14.31530 18.35030 16.67300  
H 6.69080 18.91900 15.79470  
H 7.72530 20.39800 15.84930  
H 7.86300 19.15230 17.11030  
H 9.84680 14.45050 16.20480  
H 21.42000 13.91900 8.83920  
H 20.72700 15.55350 7.85750  
H 20.38680 14.33100 6.61930  
H 18.21530 14.75670 11.31000  
H 7.27430 17.44850 9.57760  
H 6.65680 15.83800 9.12370  
H 7.54430 16.79380 7.91990  
H 14.33900 8.49130 14.88810  
H 4.47750 11.05150 13.80550  
H 5.31150 9.92330 14.91520  
H 5.33900 9.59950 13.17450  
H 11.24300 17.06400 15.66010  
H 15.96000 10.70680 22.18320  
H 14.29750 11.34850 22.35450  
H 15.67000 12.46200 22.46370  
H 18.58880 10.27580 14.23500

119  
./Thermo\_CH3COOH\_8.xyz

Ru 15.18650 13.15780 15.95780  
Ru 15.27950 13.00930 11.59940  
Ru 15.26900 11.53430 13.06060  
Ru 13.79750 15.34500 15.96630  
Ru 13.76570 15.31480 11.55600  
Ru 12.44580 13.00970 15.90940  
Ru 13.92000 13.84080 13.81300  
Ru 12.56300 12.99730 11.69120  
Ru 12.60080 11.41730 13.78580  
Ru 12.48030 16.10220 13.73810  
Ru 11.19350 13.71580 13.71320  
Ru 8.59130 13.66780 13.69160  
Ru 9.80150 15.86800 13.70330  
Ru 9.76120 11.22580 13.77220  
Ru 11.01530 18.21950 13.70540  
Ru 11.19900 13.49300 9.55160  
Ru 9.96700 12.80550 11.71590  
Ru 9.82000 12.94330 15.73290  
Ru 11.08880 13.75300 17.86510  
Ru 12.53370 15.96600 9.47540  
Ru 11.07700 15.17230 11.56870  
Ru 11.06000 15.24500 15.75630  
Ru 12.37250 16.06330 17.93170  
Ru 12.37780 17.49230 11.60670  
Ru 13.56930 18.39170 13.58680  
Ru 12.36850 17.64880 15.85120  
Ru 11.30800 9.15330 13.82370  
Ru 12.55950 9.59870 9.59870  
Ru 11.31030 10.67950 11.75360  
Ru 11.25150 10.69350 15.79160  
Ru 12.47780 11.46830 17.89630  
Ru 13.82800 13.63830 9.55890  
Ru 13.71200 13.76150 18.07650  
Ru 15.05050 15.87000 9.47000  
Ru 15.16300 15.30300 13.80630  
Ru 14.92700 16.12550 18.02810

Ru 14.94780 17.57750 11.64880  
Ru 14.75400 17.66350 15.97910  
Ru 14.10080 9.23050 13.81280  
Ru 12.70270 8.47380 15.67460  
Ru 15.16180 11.33150 9.64160  
Ru 13.93000 10.71120 11.69090  
Ru 13.85330 10.60800 15.90970  
Ru 15.09400 11.56320 17.95690  
Ru 16.41050 13.92280 9.52020  
Ru 16.60180 13.87320 13.84320  
Ru 16.31250 14.07050 18.04220  
Ru 16.43500 15.30480 11.64700  
Ru 16.45700 15.45280 15.99440  
Ru 16.58350 9.34400 14.02060  
Ru 16.57600 10.73750 11.78010  
Ru 17.85150 11.60330 13.84940  
Ru 16.53950 10.87350 15.97700  
Ru 17.84600 13.16480 11.74130  
Ru 17.69600 13.08500 16.04750  
C 5.39980 10.70800 13.76670  
C 6.75280 11.36780 13.72960  
C 14.53380 12.31280 22.21750  
C 14.53000 12.48000 20.71970  
C 20.49950 13.37400 8.19210  
C 19.26500 13.31530 9.06540  
C 7.81830 16.08450 8.69910  
C 9.02730 15.47430 9.34100  
C 9.45700 20.77780 16.82540  
C 10.18980 19.68450 16.09890  
C 19.30600 18.14250 14.06960  
C 18.04630 17.38020 14.30420  
C 16.04850 5.60950 15.80750  
C 15.05430 6.71170 15.35770  
C 13.82400 9.35150 5.96750  
C 13.83080 10.05400 7.29690  
O 6.78330 12.64870 13.65000  
O 7.78630 10.60780 13.77350  
O 13.91950 13.48130 20.27220  
O 15.13330 11.56800 20.02810  
O 18.13680 13.59700 8.49910  
O 19.40350 13.02330 10.29340  
O 9.33550 15.86300 10.51800  
O 9.67980 14.58900 8.67410  
O 11.10250 19.05120 16.73130  
O 9.87650 19.46250 14.86890  
O 17.07200 17.45300 13.56550  
O 18.01780 16.69280 15.46870  
O 13.94430 6.80500 15.97650  
O 15.36630 7.47400 14.35380  
O 14.96100 10.33900 7.83020  
O 12.69530 10.31150 7.84940  
H 5.49450 9.62830 13.91570  
H 4.87430 10.90580 12.82140  
H 4.79680 11.14950 14.57170  
H 15.41980 11.75650 22.54300  
H 13.64200 11.73580 22.50740  
H 14.48000 12.20500 22.71050  
H 21.31900 12.82750 8.65330  
H 20.78480 14.42850 8.07610  
H 20.27000 12.98020 7.19320  
H 7.72950 15.77800 7.65180  
H 7.85850 17.17830 8.77530  
H 6.91330 15.75720 9.24480  
H 8.47750 20.95430 16.36830  
H 10.04620 21.70450 16.74890  
H 9.35480 20.53200 17.88800  
H 20.04930 18.01350 14.86190  
H 19.07150 19.20830 13.94430  
H 19.71350 17.78250 13.11470  
H 16.76920 5.45330 15.01530  
H 15.52800 4.77130 16.13140  
H 16.59500 6.07830 16.67640  
H 12.81200 9.31280 5.55280  
H 14.20130 8.32700 6.10190  
H 14.50430 9.86200 5.27410  
H 9.55160 14.93300 11.79200  
H 16.48100 10.13470 10.11140  
H 13.80650 16.69150 8.42090  
H 10.59820 15.51450 17.72210  
H 11.83600 17.57300 9.86050  
H 13.64350 16.99170 18.90650  
H 15.50630 13.92300 17.55810  
H 18.40950 11.31100 12.18200

98  
./Thermo\_CH3COOH-H\_0\_8.xyz

Ru 14.89291 13.30263 15.18245  
Ru 14.92685 13.21500 10.87477  
Ru 14.97462 11.78195 13.07717  
Ru 13.49399 15.70087 15.19487  
Ru 13.56199 15.61775 10.83342  
Ru 12.16878 13.29652 15.20832  
Ru 13.54261 14.09833 13.04025  
Ru 12.20302 13.26664 10.87234  
Ru 12.19144 11.74029 13.01799  
Ru 12.29287 16.46490 12.97655  
Ru 10.81693 13.97438 13.02764

Ru 8.28822 14.09464 12.92350  
 Ru 9.52623 16.31451 12.94861  
 Ru 9.50201 11.68467 13.01378  
 Ru 10.67247 18.38528 12.91087  
 Ru 10.94222 13.96184 8.79117  
 Ru 9.61745 13.14210 10.86462  
 Ru 9.48760 13.29689 15.09344  
 Ru 10.74058 14.08496 17.11381  
 Ru 12.30635 16.27322 8.77805  
 Ru 10.89489 15.57767 10.94025  
 Ru 10.78244 15.63760 15.00215  
 Ru 12.06271 16.37203 17.12929  
 Ru 12.21300 17.05148 10.82172  
 Ru 13.41162 18.80489 12.94055  
 Ru 12.01177 17.94977 15.04089  
 Ru 10.93667 9.47329 13.14842  
 Ru 12.29035 11.73781 8.84468  
 Ru 10.91498 10.96725 10.93556  
 Ru 10.80714 11.01006 15.11119  
 Ru 12.02720 11.86663 17.28712  
 Ru 13.53676 13.99733 8.80171  
 Ru 13.46258 14.16501 17.33342  
 Ru 14.87314 16.15122 8.76684  
 Ru 14.94125 16.41932 12.98896  
 Ru 14.79130 16.41354 17.32433  
 Ru 14.85961 17.82308 10.90753  
 Ru 14.73716 17.91693 15.18780  
 Ru 13.63168 9.51850 13.17697  
 Ru 12.48653 8.83644 15.34634  
 Ru 14.79222 11.77444 8.82446  
 Ru 13.63118 10.94760 11.00664  
 Ru 13.48511 11.92258 15.21732  
 Ru 14.69852 11.87409 17.27478  
 Ru 16.14613 13.97150 8.86222  
 Ru 16.23005 14.20644 13.05905  
 Ru 16.02675 14.19051 17.31887  
 Ru 16.26171 15.64048 10.88082  
 Ru 16.11490 15.05266 15.18820  
 Ru 15.99646 9.47035 12.98182  
 Ru 16.24812 11.00152 10.97330  
 Ru 17.53391 11.58540 13.24076  
 Ru 16.05800 10.76291 15.29260  
 Ru 17.49245 13.30970 11.09211  
 Ru 17.40737 13.33991 15.28788  
 C 15.94108 6.68156 17.08410  
 C 15.26897 7.83507 16.37954  
 O 16.03847 8.75717 15.94094  
 O 13.99010 7.79647 16.30136  
 H 7.83064 15.84153 13.14378  
 H 10.70637 19.10656 14.53587  
 H 11.72959 18.10603 16.82717  
 H 10.74706 12.65326 18.24286  
 H 8.09469 12.54941 11.98729  
 H 7.76883 13.41423 14.45829  
 H 9.16895 13.62863 9.23742  
 H 10.51477 15.77377 9.09649  
 H 10.25447 15.09764 16.82947  
 H 11.91855 19.41892 11.92076  
 H 14.26520 19.44478 11.53628  
 H 13.35813 19.22282 14.76396  
 H 9.64051 9.96717 11.98535  
 H 11.01853 12.50232 7.76495  
 H 11.37805 10.19223 9.43934  
 H 10.76370 9.09654 15.04756  
 H 13.63807 16.99919 7.75416  
 H 13.26147 15.74070 18.43449  
 H 13.39237 12.54025 18.39926  
 H 15.05612 18.09369 13.56471  
 H 16.01759 15.67642 18.30666  
 H 16.28283 17.28057 9.94472  
 H 14.83331 18.16953 16.96048  
 H 10.56981 10.96130 16.90040  
 H 12.35832 8.19331 13.68410  
 H 16.07640 12.57713 7.73726  
 H 15.09145 10.08974 9.95470  
 H 16.27221 11.09496 17.04811  
 H 17.87993 15.00695 15.29187  
 H 17.72854 14.73805 10.03572  
 H 17.64286 13.40035 17.04315  
 H 18.00592 13.35178 13.46813  
 H 17.90296 9.92408 13.18494  
 H 18.05239 11.55577 11.50561  
 H 17.91546 11.52164 14.99415  
 H 15.36076 5.76063 16.96187  
 H 15.99010 6.91473 18.15882  
 H 16.96609 6.55216 16.72059  
 H 16.49569 17.43362 15.16836

Ru 12.36376 13.24759 11.01474  
 Ru 12.47618 11.68538 13.12862  
 Ru 12.41887 16.36140 13.26223  
 Ru 11.11920 13.94360 13.20842  
 Ru 8.37760 14.08241 13.23341  
 Ru 9.69477 16.22735 13.20458  
 Ru 9.62207 11.50435 13.15433  
 Ru 10.90559 18.40910 13.39612  
 Ru 11.03233 14.07953 9.01754  
 Ru 9.71048 13.27824 11.11751  
 Ru 9.78145 13.17925 15.29998  
 Ru 11.12303 13.81941 17.43862  
 Ru 12.30788 16.39948 9.83367  
 Ru 11.00384 15.60250 11.23890  
 Ru 11.12656 15.44481 15.31430  
 Ru 12.43004 16.13532 17.50280  
 Ru 12.33047 17.94201 11.21901  
 Ru 13.65408 18.87054 13.35388  
 Ru 12.37657 17.70290 15.40615  
 Ru 11.06508 9.30037 13.15839  
 Ru 12.38396 11.83410 8.89406  
 Ru 11.08441 10.92610 11.05377  
 Ru 11.10441 10.90163 15.20163  
 Ru 12.35741 11.49379 17.43805  
 Ru 13.67568 14.14697 8.87148  
 Ru 13.76861 13.81463 17.53820  
 Ru 14.92899 16.42112 8.91293  
 Ru 15.06003 16.39150 13.21137  
 Ru 15.03764 16.19688 17.51049  
 Ru 15.01720 18.05272 11.12708  
 Ru 15.03100 17.76864 15.37077  
 Ru 13.73918 9.29297 13.18791  
 Ru 12.52096 8.77284 15.51883  
 Ru 15.02376 11.85856 8.87378  
 Ru 13.78499 10.88948 10.99302  
 Ru 13.80590 10.84821 15.22324  
 Ru 15.08594 11.54981 17.45515  
 Ru 16.31766 14.16212 8.83030  
 Ru 16.46687 14.10168 13.13515  
 Ru 16.40119 13.93488 17.42177  
 Ru 16.43524 15.70830 11.03421  
 Ru 16.45058 15.56188 15.33186  
 Ru 16.43118 9.51064 13.10821  
 Ru 16.47308 10.96718 10.99438  
 Ru 17.95333 11.76312 13.12232  
 Ru 16.49913 10.86686 15.21390  
 Ru 17.69383 13.36070 10.95322  
 Ru 17.74044 13.25760 15.28192  
 C 12.66474 7.68549 19.74675  
 C 12.55036 8.62012 18.57395  
 O 12.32000 9.84645 18.79092  
 O 12.70609 8.08256 17.40166  
 H 6.77911 14.18963 13.29171  
 H 14.00925 20.42953 13.36365  
 H 10.39206 7.84314 13.07529  
 H 15.80008 19.37255 10.67033  
 H 7.92816 15.72701 13.39725  
 H 8.01377 12.28740 13.15717  
 H 9.23028 17.99210 13.51392  
 H 8.03226 13.95420 11.52549  
 H 9.35679 13.64091 9.39491  
 H 8.03467 13.74688 14.90265  
 H 9.61955 16.39933 10.97185  
 H 10.64423 15.61841 17.15447  
 H 11.89658 17.79336 17.20626  
 H 10.81698 18.81236 11.64688  
 H 11.84173 18.04335 9.47218  
 H 12.23541 19.78713 13.28028  
 H 10.96369 18.80967 15.09404  
 H 9.36356 9.76799 13.28512  
 H 10.54672 9.15307 11.54367  
 H 10.96410 10.88314 9.23399  
 H 11.15461 12.35254 18.44866  
 H 10.86445 10.76082 17.00290  
 H 13.56205 17.19017 8.94709  
 H 13.75215 16.91187 18.49265  
 H 15.00831 18.17595 9.38249  
 H 13.54444 19.22655 15.06143  
 H 15.41762 17.86529 17.14891  
 H 13.71047 12.53467 7.77065  
 H 14.10579 9.23740 11.41332  
 H 13.85020 10.40651 9.15803  
 H 15.26225 10.57897 18.71669  
 H 16.74231 15.96444 9.22370  
 H 16.31533 12.64064 7.90358  
 H 16.42466 12.33198 18.29705  
 H 15.90014 18.86666 12.18281  
 H 15.22692 8.25171 13.14749  
 H 16.32111 10.68841 9.22576  
 H 16.78030 9.27193 11.29920  
 H 18.18358 10.05307 13.25631  
 H 16.42665 10.53494 17.02893  
 H 16.53776 9.13375 14.90000  
 H 17.94717 13.62145 9.18502  
 H 17.97362 11.67209 10.40326  
 H 19.40434 11.31753 12.62868

H 18.12392 13.66424 16.96612  
H 18.03499 14.92263 14.65687  
H 19.06525 12.27840 14.31145  
H 17.80909 11.65546 16.06630  
H 9.30594 11.40441 11.35833  
H 9.25370 11.36162 14.85289  
H 9.42843 13.45731 17.02261  
H 10.56145 15.87004 9.43074  
H 12.29521 14.93867 7.87357  
H 12.44753 14.55709 18.59097  
H 13.79285 19.31043 11.57812  
H 11.10583 12.61795 7.95252  
H 12.40857 9.86523 10.52522  
H 10.84139 8.86011 14.86982  
H 14.98502 14.99749 7.76818  
H 15.27825 18.96893 14.00835  
H 15.12843 14.64978 18.57529  
H 16.68922 17.50948 10.97721  
H 12.32799 8.29119 12.55657  
H 14.34344 10.11266 17.00888  
H 13.31184 7.89441 14.27410  
H 13.80868 12.16792 18.54785  
H 16.87977 15.71139 17.11836  
H 18.11391 15.11749 11.00810  
H 16.93070 15.95969 12.65236  
H 18.76787 13.10707 12.39417  
H 12.00575 6.81966 19.60214  
H 12.42232 8.20260 20.67921  
H 13.69626 7.30655 19.79243  
H 16.76373 17.33169 15.13660

72

./Thermo\_Ru\_55-H\_0.4.xyz  
Ru 17.5321368644201 8.70950044713140 11.00678721844110  
Ru 17.50759140104994 8.64715866579411 6.59183538253215  
Ru 17.591623653783971 7.15135637835664 8.81061027392928  
Ru 16.12664860872319 10.87927427094774 10.99813278807313  
Ru 16.14167294165087 10.969918526083602 6.65955875409919  
Ru 14.74966725757985 8.58137351905774 10.94446911070103  
Ru 16.21979089569230 9.41794197196244 8.80624441465667  
Ru 14.88350846657431 8.54808527460965 6.68376498898339  
Ru 14.83772038052503 7.02977218167299 8.83273579048320  
Ru 14.79674249538389 11.66661243842657 8.789139230660794  
Ru 13.46499528989472 9.30884415063306 8.7280676356065  
Ru 10.94225524071470 9.44780880427879 8.67397546124550  
Ru 12.1542298990519 11.58264621244455 8.79935701428667  
Ru 12.13379381941162 6.97285883606785 8.63755973288837  
Ru 13.39114861498299 13.8072555772796 8.85754700882547  
Ru 13.53848972182131 9.32041493902879 4.59352016148126  
Ru 12.21660998760284 8.52506640495575 6.60462211621906  
Ru 12.12640483027420 8.65428900909154 10.77284315320285  
Ru 13.5078579617114 9.34592743770360 12.9464439146040  
Ru 14.73150503434145 11.65402932509633 4.61656331602421  
Ru 13.47567453995010 10.90147019289127 6.71159489257094  
Ru 13.41478408090679 10.83311417186846 10.84503433895956  
Ru 14.70183677843266 11.63625013908773 12.92711183187263  
Ru 14.72525964568609 13.2018905687582 8.82475016987541  
Ru 16.17717181917802 14.06264593565518 8.8743637869248  
Ru 14.68514755252824 13.11894986811028 10.8740137578680  
Ru 13.6549536444428 4.80380458520301 8.88770141093697  
Ru 14.92190336205061 7.10834925422194 4.63360161593760  
Ru 13.58566356835025 6.295331626083864 6.69269938192334  
Ru 13.35605045168240 6.35108090326321 10.80923307132891  
Ru 14.82315593427457 6.92737375614621 12.94581073552330  
Ru 16.08135086686419 9.48088480885110 4.58234808982881  
Ru 16.07738019193929 9.26421975460130 13.05413513503442  
Ru 17.44420444810680 11.62552046618137 4.59866348327910  
Ru 17.46600514496355 11.86343884320671 8.88485183170521  
Ru 17.24242061691737 11.66823530450494 13.07786549187816  
Ru 17.35715407972927 13.20805045123500 6.7097493182586  
Ru 17.20277884920625 13.22459696803799 11.09189228857265  
Ru 16.28146814139046 4.84123005398615 8.94632146205543  
Ru 14.8469417099810 4.5520153945455 11.38561062486051  
Ru 17.49364569859259 7.17343468930563 4.57935476728945  
Ru 16.25096110654054 6.3155400577470 6.73389627537798  
Ru 16.29240877094154 6.36516224529216 10.80565452677364  
Ru 17.5797786105559 7.14461609613864 12.97379982108890  
Ru 18.66703012644568 9.46123962762656 4.5552840154771  
Ru 18.91877537934884 9.48572667105891 8.78999694288116  
Ru 18.65715401343980 9.45728409607572 13.09691126169467  
Ru 18.72216397779193 11.02259727329204 6.74580309532429  
Ru 18.70534784359117 11.00312346297179 10.91756914968167  
Ru 18.76956594975942 4.91354935129984 8.6253904464472  
Ru 18.90196365778992 6.43415810017284 6.68036763414926  
Ru 20.17488389301650 7.12680278385903 8.84021793906452  
Ru 18.82973874085285 6.38942997771247 10.91957109463022  
Ru 20.06896262121624 8.75592703751574 6.71538639632740  
Ru 20.07961894108852 8.74119043026746 10.879580940293014  
H 11.6728676293482 13.36853237372995 8.85007947936863  
H 13.30219654747292 10.88575408462489 3.76276321488718  
H 10.74330350819916 7.78902618763390 7.67692778283346  
H 11.64732442198629 6.67186783043264 10.46982281920596  
H 16.10921178251094 14.63530202750463 7.14425452764582  
H 17.12644247948743 14.81696162566189 10.20536749586094  
H 13.81232204662302 5.71910608204637 5.0104731314260  
H 14.704413121632537 8.36920606421411 14.12978269246462  
H 14.65989807808237 5.06034374884731 13.09372325464763

H 18.73332191375118 12.75691304754383 5.71929118883749  
H 14.98207193939184 3.62390112400664 9.75569987742845  
H 18.66232651588744 8.07741156313173 3.43659851725898  
H 18.89662181567494 6.07671319648150 4.90226090724818  
H 18.86524822818906 7.96638665324798 14.02134560301326  
H 19.14254568170681 11.25155398236951 12.75556411997329  
H 21.39218176932421 7.94705135076023 9.90619639570317  
H 19.98028204986927 5.23993878962226 9.88831046044330

90  
./Thermo\_Ru\_55-H\_0.8.xyz  
Ru 17.59815 8.60514 10.93128  
Ru 17.61769 8.57221 6.62140  
Ru 17.55074 7.00620 8.75464  
Ru 16.09009 10.93691 10.98862  
Ru 16.16005 10.98944 6.60987  
Ru 14.84999 8.56359 10.89402  
Ru 16.24963 9.43777 8.75206  
Ru 14.85444 8.58294 6.60271  
Ru 14.86128 7.00742 8.74700  
Ru 14.90372 11.71453 8.77624  
Ru 13.46465 9.29688 8.75892  
Ru 10.92110 9.47997 8.57943  
Ru 12.20117 11.66240 8.76850  
Ru 12.07115 7.00339 8.60218  
Ru 13.35093 13.73015 8.63378  
Ru 13.56677 9.30345 4.54348  
Ru 12.22819 8.54071 6.59204  
Ru 12.10073 8.60765 10.76254  
Ru 13.40456 9.14733 12.86758  
Ru 14.90087 11.58593 4.54108  
Ru 13.52007 10.92408 6.71755  
Ru 13.44671 10.87513 10.81828  
Ru 14.69330 11.52063 12.96823  
Ru 14.83491 13.19432 6.68776  
Ru 16.13875 14.10571 8.82187  
Ru 14.71709 13.18911 10.94774  
Ru 13.62909 4.80443 8.79827  
Ru 14.90322 15.14638 4.53508  
Ru 13.60310 6.33267 6.60558  
Ru 13.31800 6.41707 10.71546  
Ru 14.77608 6.96849 12.88762  
Ru 16.22881 9.40917 4.56231  
Ru 16.06938 9.29183 13.09207  
Ru 17.46768 11.62510 4.55766  
Ru 17.52085 11.82364 8.84691  
Ru 17.36659 11.58275 13.16511  
Ru 17.49288 13.18489 6.71518  
Ru 17.37294 13.17166 10.97245  
Ru 16.32751 4.75758 8.99448  
Ru 14.77882 4.57785 11.32931  
Ru 17.48089 11.19237 4.55739  
Ru 16.25586 6.23267 6.67740  
Ru 16.32116 6.30322 10.89548  
Ru 17.53049 7.08543 12.96996  
Ru 18.76230 9.40982 4.55409  
Ru 18.95501 9.42422 8.84729  
Ru 10.69016 0.99409 13.09240  
Ru 18.84251 10.93245 6.71820  
Ru 18.69581 10.94708 11.00987  
Ru 18.72928 4.85056 8.82601  
Ru 18.90117 6.32997 6.77030  
Ru 20.41605 7.14658 8.88734  
Ru 18.87149 6.38651 10.88212  
Ru 20.15454 8.67231 6.75520  
Ru 20.07714 8.64563 11.04562  
H 10.47356 11.19770 8.86815  
H 13.38438 14.37085 10.46842  
H 14.40819 13.25895 12.74778  
H 13.30377 7.60890 13.76105  
H 10.70387 7.86346 7.67719  
H 10.42045 8.71012 10.11442  
H 11.87248 8.81866 4.84214  
H 13.10513 11.12017 4.86524  
H 12.92782 10.98907 12.65881  
H 14.58006 14.70264 7.76674  
H 17.01724 14.78073 7.45224  
H 15.81720 14.59580 10.51738  
H 12.39016 5.24458 7.57834  
H 13.80175 7.94661 3.40394  
H 14.70119 5.42141 5.55641  
H 12.33027 4.98075 9.90615  
H 16.18497 12.42553 3.56160  
H 15.99623 10.82698 14.21752  
H 16.04657 7.69288 14.08299  
H 17.62545 14.46474 9.63818  
H 18.63680 10.82672 14.20930  
H 18.84841 12.51480 5.65346  
H 18.68640 12.58304 12.80852  
H 14.57163 5.11557 13.02673  
H 14.86828 3.63928 9.71121  
H 18.86643 7.89228 3.56071  
H 17.71368 5.46119 5.12990  
H 18.87173 5.97802 12.65930  
H 19.37123 11.37725 11.22155  
H 20.36011 10.17598 5.81804  
H 20.47559 9.11661 12.70417

108

./Thermo\_Ru\_55-H\_1.2.xyz

H 21.28160 8.50869 8.19117  
H 20.25092 5.52779 9.80174  
H 20.64462 6.77838 7.08959  
H 21.42125 7.67246 10.24247

Ru 17.59991 8.65218 11.00122  
Ru 17.72652 8.57957 6.62072  
Ru 17.70535 7.10601 8.83091  
Ru 16.16866 10.95475 11.05082  
Ru 16.24346 11.04433 6.57500  
Ru 14.82274 8.65770 10.89337  
Ru 16.33809 9.45795 8.78029  
Ru 14.94594 8.66184 6.55129  
Ru 15.01923 7.14263 8.71461  
Ru 14.91702 11.78905 8.80781  
Ru 13.66448 9.43896 8.72183  
Ru 10.92268 9.45302 8.55849  
Ru 12.20782 11.05518 8.71354  
Ru 12.09149 6.96029 6.66887  
Ru 13.48608 13.88206 8.76212  
Ru 13.64791 9.35142 4.51454  
Ru 12.38395 8.49964 6.68548  
Ru 12.23081 8.56091 10.66245  
Ru 13.45423 9.24893 12.91879  
Ru 14.92322 11.71552 4.52758  
Ru 13.59684 10.93061 6.65561  
Ru 13.50571 10.91930 10.84099  
Ru 14.76215 11.66219 13.03667  
Ru 14.89606 13.26676 6.63685  
Ru 16.10044 14.19943 8.85283  
Ru 14.82457 13.23998 10.96277  
Ru 13.55573 4.70446 8.81023  
Ru 15.04484 7.10087 4.56386  
Ru 13.65088 6.33414 6.69540  
Ru 13.56880 6.41244 10.66978  
Ru 14.96168 6.96206 12.91365  
Ru 16.30553 9.40582 4.46907  
Ru 16.08532 9.32910 13.10428  
Ru 17.57178 11.78575 4.56816  
Ru 17.55899 11.83949 8.87997  
Ru 17.34759 11.61186 13.15698  
Ru 17.44291 13.26503 6.74744  
Ru 17.37212 13.20431 10.98527  
Ru 16.30739 4.73716 8.97412  
Ru 14.67774 4.28340 11.16446  
Ru 17.63349 7.20373 4.54951  
Ru 16.40620 6.25529 6.69802  
Ru 16.22821 6.35346 10.87542  
Ru 17.42951 7.07540 13.01409  
Ru 18.93767 9.50119 4.60783  
Ru 18.98073 9.59807 8.90924  
Ru 18.75151 9.33818 13.13268  
Ru 18.90711 11.07876 6.80196  
Ru 18.79678 11.05064 11.02895  
Ru 18.81310 4.86296 8.78281  
Ru 19.05175 6.39496 6.62487  
Ru 20.35687 7.06374 8.81298  
Ru 18.93256 6.39965 10.96909  
Ru 20.25370 8.82905 6.81246  
Ru 20.13450 8.67642 10.96755  
H 9.31488 9.49248 8.56442  
H 12.69192 3.45711 9.37356  
H 10.48032 11.12398 8.85984  
H 12.09852 13.20784 9.69157  
H 10.68622 7.91213 7.68751  
H 11.77366 8.96449 12.33471  
H 13.15222 11.16399 4.81632  
H 12.21520 13.19317 7.70419  
H 11.99601 8.85885 4.97093  
H 13.00162 11.03706 12.66453  
H 14.57088 13.40301 4.84494  
H 14.68975 14.82853 7.72214  
H 14.24933 13.30820 12.68136  
H 13.71829 7.83782 3.58085  
H 12.82868 4.74504 7.19787  
H 13.87006 5.78235 5.01008  
H 11.91555 5.13455 9.10565  
H 13.81502 5.44372 12.43895  
H 14.94515 10.14365 3.41534  
H 14.70063 10.01968 14.11023  
H 16.29670 12.49059 3.59201  
H 16.06163 12.51278 13.98542  
H 17.43416 14.72046 7.82159  
H 17.86068 13.45668 4.97264  
H 19.22617 12.76928 7.14004  
H 17.39177 14.69842 9.98916  
H 16.38092 5.03452 4.80301  
H 15.11749 4.89869 7.66128  
H 16.34519 4.50792 11.19490  
H 16.08966 6.37222 14.06750  
H 17.72355 10.23679 3.45316  
H 18.73978 7.86212 14.08533  
H 20.59200 10.58093 7.09004  
H 19.18700 12.78239 10.98208  
H 17.67125 3.56513 9.10551

125

./Thermo\_Ru\_55-H\_1.6.xyz

H 19.04566 6.10822 4.86188  
H 17.82770 5.07117 6.75735  
H 20.54746 5.35251 8.42271  
H 18.55278 5.71464 12.56840  
H 19.50378 4.66371 10.30986  
H 20.60645 9.06070 5.07598  
H 20.79489 7.07114 6.97326  
H 20.83503 8.76362 9.16782  
H 20.77621 6.88335 10.55541  
H 10.46083 8.54160 9.90585  
H 14.52617 14.79772 9.95379  
H 13.36594 7.70736 13.75673  
H 17.44223 9.97337 14.24669  
H 14.95052 3.52519 9.46978  
H 18.93486 8.04581 3.59954  
H 19.35770 11.32752 5.02444  
H 19.18223 11.18088 12.83382  
H 20.45182 9.01520 12.69767

Ru 17.66206 8.61706 10.89692  
Ru 17.67882 8.58707 6.60383  
Ru 17.61126 7.01023 8.79040  
Ru 16.23145 10.80463 11.00040  
Ru 15.20660 10.95093 6.57069  
Ru 14.87615 8.54830 10.96916  
Ru 16.30638 9.37653 8.74840  
Ru 14.85262 8.52421 6.63460  
Ru 14.92564 7.02938 8.82072  
Ru 14.93730 11.73143 8.78694  
Ru 13.60240 9.32288 8.77362  
Ru 10.82574 9.52529 8.73458  
Ru 12.21256 11.62735 8.91326  
Ru 12.02096 7.01419 8.76012  
Ru 13.45796 13.81277 8.85148  
Ru 13.55863 9.34047 4.59536  
Ru 12.19069 8.63536 6.69284  
Ru 12.16480 8.71476 10.85120  
Ru 13.53656 9.26906 12.99287  
Ru 14.86542 11.64650 4.55708  
Ru 13.52068 10.93136 6.77655  
Ru 13.59866 10.88952 10.84112  
Ru 14.88156 11.58711 13.01809  
Ru 14.87065 13.24132 6.70006  
Ru 16.19210 14.25468 8.80768  
Ru 14.93615 13.21197 10.96880  
Ru 13.45341 4.71065 9.00349  
Ru 14.87068 7.07505 4.54215  
Ru 13.52875 6.26479 6.72107  
Ru 13.30751 6.42352 10.90569  
Ru 14.85125 6.93485 12.97631  
Ru 16.19918 9.36531 4.47568  
Ru 16.18872 9.26426 13.13377  
Ru 17.48050 11.63412 4.46005  
Ru 17.58049 11.74327 8.78955  
Ru 17.50170 11.62510 13.05277  
Ru 17.56564 13.31599 6.63934  
Ru 17.48021 13.13722 10.90543  
Ru 16.15252 4.63729 8.94434  
Ru 14.83136 4.54370 11.38362  
Ru 17.52550 7.06649 4.54892  
Ru 16.23316 6.20046 6.67935  
Ru 16.40492 6.24680 10.89729  
Ru 17.54212 6.96680 13.14793  
Ru 18.83732 9.35605 4.45874  
Ru 18.96996 9.40770 8.74492  
Ru 18.82576 9.33219 13.04404  
Ru 18.94513 10.97066 6.62197  
Ru 18.92008 10.80604 10.89839  
Ru 18.85844 4.81805 8.82978  
Ru 18.93348 6.19389 6.68873  
Ru 20.41730 7.04593 8.78629  
Ru 18.94543 6.22906 10.92387  
Ru 20.19369 8.59926 6.59077  
Ru 20.19566 8.57740 10.93006  
H 9.23075 9.65752 8.67765  
H 16.57006 15.80641 8.76757  
H 12.75274 3.28346 8.80716  
H 18.36493 14.62332 6.17185  
H 10.43303 11.19930 8.86527  
H 10.42267 7.72264 8.67573  
H 11.77463 13.30322 8.85096  
H 10.54181 9.37558 7.01280  
H 11.86849 8.96619 4.96345  
H 10.46517 9.24379 10.44465  
H 12.19578 11.80185 6.45986  
H 13.10540 11.07245 12.69013  
H 14.44500 13.26984 12.68593  
H 13.36281 14.17256 7.10746  
H 14.44370 13.30926 4.92272  
H 14.78199 15.17871 8.67656  
H 13.50055 14.25305 10.57085  
H 11.76904 5.18984 9.00321  
H 13.03747 4.55592 7.34026  
H 13.46484 6.08371 4.93119  
H 13.49924 7.72342 13.86585

/HER\_Domain1\_Sitel\_1-1398\_45193734\_xyz  
 Ru 15.03867458037481 12.69513588634078 15.83285907140671  
 Ru 15.23526669779931 12.65375421643660 11.47541547253299  
 Ru 15.21157158579786 11.13022720788854 13.67898383896788  
 Ru 13.63708316632648 14.86452912468927 15.71319557209296  
 Ru 13.72129487895647 14.89482608097285 11.43594975465425  
 Ru 12.35820273774007 12.4410428039659 15.0910539667908  
 Ru 13.81404617725301 13.38830276896946 13.59143477633406  
 Ru 12.5060365091629 12.49211299435394 11.37462190227310  
 Ru 12.47020767895648 10.90086744819438 13.56263885110767  
 Ru 12.31025930892717 15.63971472079288 13.56401591915062  
 Ru 11.1455444514829 13.17967232069348 13.45017608752136  
 Ru 8.51558646111826 13.01838852873505 13.44557191843313  
 Ru 9.65899161293729 15.27912391163122 13.48858728210214  
 Ru 9.81995083337239 10.71342487926647 13.49920108902559  
 Ru 10.66277261532585 17.60167234888306 13.45483179375800  
 Ru 11.11254624055739 13.08038664768475 9.28849043900036  
 Ru 9.87614159804697 12.28195085812054 11.47447853669553  
 Ru 9.73760595764971 12.33708313026242 15.49667316184008  
 Ru 10.86628971937404 13.20199089621140 17.64576579159740  
 Ru 12.52554754460120 15.75214008362208 9.36727700762471  
 Ru 11.02105849415784 14.69026123316699 11.35100405600229  
 Ru 10.89451888458787 14.63714199292630 15.54021973283766  
 Ru 12.0594880291389 15.64702914788901 17.63626448801735  
 Ru 12.15604975356135 17.16510665969978 11.505644813476080  
 Ru 13.47495140662804 8.01869280993070 13.64378355979325  
 Ru 11.94172499524974 17.09857891495230 15.70638068688501  
 Ru 11.40128110050519 8.56426225151544 13.58086184724881  
 Ru 12.70799316585395 10.98784586820495 9.31186722095290  
 Ru 11.31215814314010 10.12261102415746 11.43398406215597  
 Ru 11.20993522404249 10.05150419299001 15.65624275332203  
 Ru 12.44161263617886 10.91716408495516 17.76979170782273  
 Ru 13.83423113655412 13.38799231684000 9.32967863370942  
 Ru 13.54087690311512 13.32401746837816 17.85668995652165  
 Ru 15.19605079431006 15.58327295467847 9.40665195294349  
 Ru 15.01197342254834 15.76637588802771 13.61000739206303  
 Ru 14.7730217986734 15.60478721361809 17.8997809317642  
 Ru 14.799876943223956 17.26763705390919 11.4603167254356  
 Ru 14.44874921247020 17.2571228808162 15.73195542838123  
 Ru 14.06841596316992 8.84966052108127 13.54335592106568  
 Ru 13.00893669912901 7.87351000576979 15.48538278187466  
 Ru 15.26156620472460 11.03543264075542 9.4713017993837  
 Ru 13.94521823735001 10.28939564362818 11.442464440660750  
 Ru 13.8102427225415 10.20732963723563 15.73215936125694  
 Ru 14.94610146806632 11.11376212544295 17.83693455460385  
 Ru 16.44568329208760 13.54137200243211 9.42222545380012

Ru 16.49407814221248 13.43669749080722 13.72052240398552  
 Ru 16.12690249992503 13.55402190727516 17.93307642301150  
 Ru 16.39680712744838 14.93462922452169 11.52042860048923  
 Ru 16.20297984124117 15.02840212983805 15.93346719759196  
 Ru 16.50652537519905 8.88267714201763 13.92025285485083  
 Ru 16.5795698775118 10.36914327380969 11.69645250861306  
 Ru 17.8730214292180 7.42235 11.15505754293378  
 Ru 16.48034932125043 10.49731275141108 15.81673478528814  
 Ru 17.76992860745193 12.7754222904354 11.59870529752690  
 Ru 17.65059558259131 12.69024094528420 15.95100596390895  
 C 5.45717400643230 9.92818997409745 13.47507450588007  
 C 6.77717615287675 10.65564915399074 13.44661724083948  
 C 14.18338481360662 11.98279553118629 22.0633868609306  
 C 14.2624425742657 12.11785228078302 20.56414056811940  
 C 20.44658724133490 12.65672736652774 8.05994642214063  
 C 19.23131118444576 12.74808569448376 8.94397529085331  
 C 7.38118057639770 15.33033704222460 8.84144729894771  
 C 8.69617325775440 14.78105012679446 9.3593526652194  
 C 9.73644599020513 20.8210836944416 16.25167335425044  
 C 10.26040890256097 19.5000190779568 15.64070731810133  
 C 19.12769588466549 17.66692730051673 14.15117593425017  
 C 17.85788775630955 16.9186832411450 14.45765803713678  
 C 16.31785114635622 4.95252092776093 15.87003180197904  
 C 15.6874934577382 6.22826470351041 15.37147770499284  
 C 14.24546645242771 9.683145306599 5.40388615308699  
 C 14.12871772350078 10.13642155220668 6.86927340079252  
 C 21.90791734803402 11.8611596713942 15.3127261852532  
 C 20.41517385158425 11.90133065347526 15.12451257547703  
 C 8.94450112290870 6.45794365339330 10.67202475001541  
 C 9.82068171328606 7.51288700415055 11.29476895189374  
 C 9.8239144948205 8.75406523938333 19.31758377881768  
 C 10.0060564253934 9.36787084939720 18.3555229375120  
 C 10.45679481917797 14.98468484893593 21.642555208697  
 C 10.83920283257601 14.7607505539198 20.20276761809650  
 C 17.32965454654688 19.28587793300903 8.51481457284692  
 C 16.49433488827133 18.22752395453906 9.18642564104078  
 C 16.4193798441936 19.41656225852722 19.01157634841232  
 C 15.6337149145025 18.30706155066508 18.24712491639329  
 C 12.19631142905559 21.62891276584001 11.54841026816824  
 C 12.40095108699242 20.18580382994103 11.93657032438659  
 C 13.40616528044029 14.84923596528477 5.1676038322119  
 C 13.41128579349770 14.75659418597727 6.67231887688399  
 C 6.73099815462197 11.94147964536348 13.40658801031654  
 C 7.84747492323214 9.9569286032607 13.4612218921301  
 C 13.58074645773723 13.04191493913154 20.9083584703162  
 C 15.00298114266859 11.26768174623160 19.94076068567413  
 C 18.11676044258134 13.06093405980069 8.36574774287642  
 C 19.35532084538382 12.53153953778967 10.18812954156069  
 C 9.17055522652777 15.31047045676202 10.41533467512668  
 C 9.213905782401619 13.79892404771251 8.72519183856529  
 C 11.05447153723935 13.8318253291010 16.35438377850282  
 C 9.89693092648305 19.25061447876992 14.45301702498682  
 C 16.87136573573970 17.04421763333314 13.6600030095498  
 C 17.8546434866263 16.16232015091618 15.49007937089775  
 C 14.50848469948496 6.50525945481064 15.78673845620411  
 C 16.39112809821765 6.93763836327119 14.50817120500797  
 C 15.21523103023829 12.2648174011726 15.2383537710000  
 C 12.95889789471400 10.27112203448134 7.37401936093400  
 C 19.73200427054375 12.61192997999670 15.94233798392037  
 C 19.90643196942436 11.20610369248013 14.17876437444994  
 C 10.31495400006535 7.24781910486542 12.45772611955179  
 C 10.01814892278358 8.59749306930153 10.60960706412176  
 C 9.7762125205155 9.3104835947492 17.11093806920232  
 C 11.05560240419972 9.92101494987618 18.87253921615717  
 C 10.43532192783747 13.68553444751849 19.64413897640652  
 C 11.52016382932866 15.68649705714179 19.62268102553390  
 C 16.15014411415584 18.43856232564205 10.40264433908498  
 C 16.19055835075803 17.18156918834879 8.51262045270187  
 C 15.24901309521736 17.3395050464745 18.8887002052901  
 C 15.41390663418520 18.5863462479136 17.0031472292280  
 C 12.06081603319689 19.29482652560412 11.08897568632092  
 C 12.88637300020086 19.9481021119477 13.10124732292002  
 C 13.0942102331171 15.82052280827444 7.32073256225533  
 C 13.7135082634785 13.6393837690485 7.20189944803783  
 H 5.60800173908206 8.8457708656393 13.5247515269387  
 H 8.7110218047078 10.1049994906005 12.5791031316090  
 H 4.87509254541742 10.2642655631173 14.34411454580800  
 H 15.1353138176585 11.61615125582623 22.46411842230101  
 H 13.40790263748835 11.23996177651278 22.30507879715240  
 H 13.90711032922839 12.9368178059685 22.52496410753369  
 H 21.2820883483973 12.20143563629969 8.60052705782408  
 H 10.73161624816925 13.6690848628542 7.73751498700866  
 H 20.2111916551450 12.07891551274377 7.15714585960005  
 H 7.16085262320445 14.9347588161504 7.84486792634013  
 H 7.42210100351032 16.42638957223418 8.82090794823753  
 H 6.57417658885718 15.04367584147143 9.53157692038336  
 H 8.85289606087595 21.17426969863340 15.71037420887114  
 H 10.52087963060909 21.59049470877315 16.1963038657220  
 H 9.50325646029057 20.66108202908794 17.31123355745928  
 H 19.71394342616126 17.82934178361072 15.06222445989753  
 H 18.89754951887984 18.61781041498947 13.65784710656513  
 H 19.72603226174182 17.05761342897532 13.45633080503794  
 H 16.81399582368755 4.4320564687023 15.0413599407145  
 H 15.57030473000000 13.30506065578359 16.340318023859  
 H 17.0928051877622 5.20451745500734 16.60987409076127  
 H 13.30440420419317 9.85580779062410 4.90293140012275

H 14.46460813501801 8.60565112840777 5.42455662126918  
H 15.07503119408503 10.19929381590747 4.94422512396801  
H 18.13970914663834 14.55082837583556 11.67355456019848  
H 16.36489641311095 9.70261018647233 10.04296028830885  
H 13.71814228073664 17.01462654878695 9.84610950955832  
H 10.30638783526580 14.90260277884486 17.32074059285319  
H 11.31511089889858 16.9472594994195 9.93297994149311  
H 9.31607902677706 12.3736788525027 17.2558902004562  
H 18.31852368920572 10.90063564641210 11.9930462500667  
H 22.40127002906086 11.47316426440648 14.41646081298454  
H 22.14099889837700 11.20134985891786 16.16244532530960  
H 22.28281537238847 12.86154633104252 15.50995306198855  
H 17.90808113122302 13.25687894712643 17.61764227798793  
H 8.79371599204907 6.66114589131920 9.60785107621994  
H 7.96911458040521 6.46123175323715 11.18057244607373  
H 9.38869012967312 5.46554354562791 10.81712066452357  
H 9.02382797490579 16.99157791075577 13.26988238495211  
H 8.76144718321769 9.48126645563595 20.09666412198504  
H 9.49380095292402 7.093076794068443 19.81485478525540  
H 8.12518276864108 8.42231309697807 18.78864048292553  
H 11.32834346452538 14.73718946869037 8.60138423890722  
H 11.04458313388686 15.7985709986459 22.07864417512320  
H 10.59397263377744 14.05921056815031 22.15165408043673  
H 9.38985046521054 15.24865289782739 21.69030253636881  
H 14.9732829259583 18.4456298622581 12.7099382615927  
H 17.38333078955483 19.10960694382957 7.4303923361278  
H 18.34601937489611 19.25790612724346 8.93441418252719  
H 16.91589666420249 20.28041982872314 8.72287420423859  
H 11.28967153163510 8.13278133225433 15.46069224894295  
H 16.51886319691561 20.34035209815711 18.43347822660911  
H 17.4209729875380 19.00943649876565 19.21636687182004  
H 15.94209476790541 19.61399171828885 19.97954863978018  
H 10.4129240896998 11.52784618190614 9.72605077381116  
H 12.69105060666605 22.29863385082741 12.25893158225051  
H 11.11825178619868 21.8450794092337 11.53382108564696  
H 12.57794110248649 21.79716617108361 10.53344478548011  
H 16.25056251874347 9.81354522465563 17.43706483593680  
H 13.90515616125556 14.03140421458530 4.7264594989972  
H 13.80141265685625 15.82097575308023 4.8485395431102  
H 12.3662936955186 14.78023468016993 4.81442228570031  
H 12.60626512301112 9.33267982251394 10.44620723926608

182  
J\_HER\_Doma'n1\_S1te\_2--1198.45779609.xyz  
H 15.330638625849 12.71784551904458 15.9486925534240  
H 15.23450639647656 12.65172779239116 11.49688085120580  
Ru 15.22399847633794 11.15365399830119 13.67971810983208  
Ru 13.61182253475060 14.90814747996307 15.73423155298106  
Ru 13.70438786794818 14.91963694344101 11.46529186432004  
Ru 12.34829926321271 17.47319401743628 15.69938267289590  
Ru 13.79976242639379 13.2647559736737 13.58968391687261  
Ru 12.50898351119155 12.511638216646 11.371759429441  
Ru 12.45416429638948 10.92025723155330 13.56711145064954  
Ru 12.29589823662627 15.63776723188716 13.53759810604880  
Ru 11.14839476336631 13.18534824727213 13.46769826462834  
Ru 8.50697824790736 13.04550935984034 13.40017797391807  
Ru 9.64333092214249 15.2774996760209 13.51694239756685  
Ru 8.0766570905556 40.715091705444 13.51473788312010  
Ru 10.65646708017612 17.60504384067791 13.48843472398444  
Ru 11.12353626367672 13.07568517370712 9.28279069348274  
Ru 9.88028268761717 12.29443749994244 11.47849838950302  
Ru 9.72758298553156 12.33978875047265 15.48573315205680  
Ru 10.82717660849298 13.15187149429633 17.63839298472858  
Ru 12.51050146139229 15.70774769027407 9.363758612249505  
Ru 11.00500996642043 14.68229387950186 11.35144316586320  
Ru 10.89559298038198 14.66209744106262 15.57081412066120  
Ru 12.0191550948668 15.57467029020168 17.78175615318097  
Ru 12.14924980230406 17.16956240681798 11.489080765710721  
Ru 13.53697759422924 18.00442075059257 13.53800253385854  
Ru 12.02104263542314 17.08042067582395 15.65197402730902  
Ru 11.40979504401032 8.57180210105720 13.50760076561773  
Ru 12.7198071802209 11.00580224446223 9.32129800287073  
Ru 11.29990181553131 10.13540466589195 11.43207435595976  
Ru 11.20769499954762 10.04660393186962 15.65581425035848  
Ru 12.41179462854486 10.93105408309683 17.7583028609185  
Ru 13.83689109796597 13.42263413471624 9.33386499973254  
Ru 13.52017294734485 13.37842910668001 17.06970991206964  
Ru 15.20305254166259 15.60219185548785 9.44623576181737  
Ru 15.00700106425984 15.75832208154620 13.63051879563461  
Ru 14.63262551869401 15.73907699259944 17.88941668145454  
Ru 14.84362834560481 17.28264116472545 11.57516854125867  
Ru 14.46552193287899 17.30293659071288 15.07964029741613  
Ru 14.07368304418883 8.86330823516576 13.5555809196582  
Ru 13.02976740219033 7.89265890484511 15.4985334876767  
Ru 15.26259799751224 11.04805582758629 9.47979097584843  
Ru 13.94357429699289 10.2800222374843 11.46201267629624  
Ru 13.8053708044694 10.23800650383321 15.73374696399095  
Ru 14.9179488207010 11.15305741860183 17.94954314709396  
Ru 15.43832557048632 13.549340720719 9.4326404591015  
Ru 16.502640875711 13.44276443930856 13.74082481713986  
Ru 16.07947457587425 13.67838434011865 17.89877603145596  
Ru 16.38825429177234 14.93884892514363 11.5349081581485  
Ru 16.24412759089297 15.03307648478361 15.895058628034689  
Ru 16.5086784642568 8.8962764192567 13.95742934416015  
Ru 16.1717171716590404 10.38576176850404 11.69769810391332  
Ru 17.87023358046915 11.18230417015770 13.79266839421360  
Ru 16.4609776223816 10.51963902059015 15.83046355922909

Ru 17.77121570507138 12.78928668798966 11.61380036770957  
Ru 17.63563523449737 12.73377854520776 15.99441784489811  
C 5.43059088460262 9.98500373742604 13.51901699835457  
C 6.75753410501474 10.69784026796319 13.47475132676264  
C 14.16591251148817 12.0240742278854 22.07132459969887  
C 14.22258736235198 12.14947466308762 20.57060884080663  
C 19.4555631488893749 12.66910539165881  
C 19.23976093721954 12.75599100894389 8.96961365351299  
C 7.38372368814501 15.31091822459299 8.81751384678458  
C 8.68669748012680 14.76676689541566 9.34529689187212  
C 9.7029894536890 20.70740940239418 16.43181494220759  
C 10.2436950821995 19.46549282831642 15.77908478213287  
C 19.99817389920007 17.75017204955820 14.0780815998871  
C 17.83953404308478 16.98817223395384 14.39336095579631  
C 16.30942242930262 4.93510236536668 15.85136505534096  
C 15.69792710065559 6.23360981071330 15.38979280305524  
C 14.24196969272712 9.61466535593856 5.47275887440817  
C 14.1312901438683 10.12140473464373 6.80554421995394  
C 21.80759316517050 11.87874938029949 15.40271638512408  
C 20.39759039705812 11.91376518447500 15.19314110906244  
C 8.97396531561295 6.44465931514882 10.67659604859986  
C 9.83359969198149 7.5059959537309 11.31133939107114  
C 9.03305400365768 8.71546595217290 19.3100314772356  
C 10.00042450756734 9.36175445216231 18.35712985609951  
C 10.98292655179827 14.77023747626839 21.630633927709  
C 10.56616745816998 4.60239436332054 20.21421863704099  
C 17.29507700786724 19.34603030985034 8.58850823842475  
C 16.44653575340218 18.27852113198593 9.235080949695113  
C 16.92058923189368 19.42234987161505 18.61576639707618  
C 16.10412339871444 18.34693857454570 17.94879047522732  
C 12.21270984147271 21.62695154525392 11.50861321011505  
C 12.42359585023788 20.1832133510795 11.08736510673403  
C 13.4219269405021 14.89353478984986 5.17520367191917  
C 13.44777359139802 14.79758330563983 6.67927149472508  
C 6.72162090831304 11.98511224436265 13.46041746832822  
D 7.82059448772875 9.98808720040977 13.45189793013765  
D 13.52338992589902 13.0599561254679 20.01717522954911  
D 14.96089743672343 11.3043279949101 19.94263106749093  
D 18.125510302739023 13.06936378544695 8.39241963808287  
D 19.36594920162143 12.53764697349285 10.21351465313939  
D 9.16599282083524 15.30502590924328 10.39857628247565  
D 9.21987229647911 13.78027766109113 8.7223947548341  
D 11.00328491832640 18.70728428372445 16.47720799353966  
D 9.9313910917032 19.24014211132545 14.55363754668022  
D 16.85428113044548 17.07304273850913 13.5903574272280  
D 17.8335216084921 16.25823131307161 15.45045823127971  
D 14.51936891047247 6.5124377873247 15.80404615369106  
D 16.416578297272547 6.95773618461439 14.61337292131456  
D 15.21990973802185 10.32576636733555 7.53261683096529  
D 12.96278514726708 10.28167821270219 7.3057942958304  
D 19.701451952570331 6.06240192793931 16.9176365161294  
D 19.90247323714104 11.24061427465648 14.22660901616282  
D 10.32477078476098 7.24190117166955 12.47428877992752  
D 10.01965077840532 8.5966443299672 10.69129867142352  
D 9.77950105306929 9.29543876829787 17.11045310174866  
D 11.0299141745098 9.9444266450116 18.0793924266658  
D 19.275906404313 11.51473788312010 13.50735759809044  
D 11.20552135324596 15.58072514657064 19.6877059340750  
D 16.11176735680925 18.46083213186929 10.46108175397383  
D 16.12157717946618 17.25211306515232 8.54535949530020  
D 15.87183868785158 17.28116700128799 18.60642625903391  
D 15.67529883471733 18.57645363349575 16.75679091947594  
D 11.87393151635065 19.29196684312768 11.1573082290754  
D 13.14549132831013 19.94026805756119 12.9249637333227  
D 13.13630108923057 15.85823850235847 7.33677698873963  
D 13.75414192267131 13.67458834402669 7.20461670328937  
H 5.57097683767126 8.90223159988716 13.50792741824683  
H 4.85467625240391 10.23081581181673 12.6182483738767  
H 4.85109064273926 10.34524213009056 14.30031251370831  
H 15.1266438679308 11.66910132424243 22.46159380883227  
H 13.40065743029554 11.27730007134317 22.33020875319921  
H 13.88798869357456 12.97983393315890 22.52081287064497  
H 21.28834046979584 12.2031182317538 8.6202776409417  
H 20.74638378437962 13.6843948216354 7.77741627738960  
H 20.21938748912078 12.10448359297210 7.1745108130054  
H 17.63162808909231 12.812938809231 7.81609097414232  
H 7.41635309742495 16.40750303981588 8.80540839917990  
H 6.57085223438577 15.01359666747100 9.49631417067764  
H 8.79968467475407 21.05449562724092 15.91981324643607  
H 10.46574163123580 21.498286876831191 16.37387275270608  
H 5.900104866255402 20.51631694739518 17.4918495030527  
H 19.7593293042424 12.933352508940 14.98767816536655  
H 18.85485450625399 18.69143384136667 13.57348396646162  
H 19.70612895811534 17.14141240882424 13.9128070144565  
H 16.75937673438991 4.41195857326088 14.99790820804312  
H 15.56146411506652 4.30199790743914 16.33823823904163  
H 17.11837530261407 5.15413345575979 16.56334400298147  
H 13.3014011943750 9.764076951015 4.0302301241318  
H 14.46447081265582 10.58718061265582 5.509167078888365  
H 15.07149656671393 10.11093421791945 4.95563236458203  
H 18.13588809600353 14.5675757032741 11.67876530785309  
H 16.38871078431499 9.73376306266593 10.03120154557517  
H 13.58564911854460 17.03375354605406 9.93809014646492  
H 10.3055060070442 14.930750501399132 14.930750501399132  
H 11.2788044788342 16.93172452252364 9.9681565331112  
H 13.2684138030545 16.6341123800721 18.5672845716687



H 9.31707993796836 12.2768855828452 17.24824083547122  
H 18.32113073971406 10.89661236945309 12.03966194775266  
H 22.39397075351712 11.48169896589807 14.51732758821924  
H 22.11230464411031 11.23368774730543 16.26520586686856  
H 22.25667772132729 12.88425951638062 15.64143880752991  
H 17.814236178669338 13.28019697954435 17.73251187385496  
H 8.8500943290886 6.62199661112855 9.604174629274  
H 7.98169324345095 6.4637875131603 11.15098656842434  
H 9.40642350694570 5.45250372965676 10.85326826980272  
H 9.02183939533281 17.01082824306487 13.36553965356160  
H 8.81353108329666 9.39639791581415 20.14476343092088  
H 9.49722231122618 7.81263689589863 19.73695326402284  
H 18.117259043166 6.43418020911829 18.79354958748439  
H 11.36795698473559 14.68077861196347 8.52733780525979  
H 10.60310257193944 15.59697158695239 22.12318396273377  
H 10.22357273307849 13.83651937688297 22.18813060496992  
H 9.00285769445103 14.98731651404700 21.6160847116515  
H 17.38183587370451 19.16434374986659 7.51215182594129  
H 18.23789391096272 19.31832361188856 9.03992544515391  
H 16.87290792337716 20.33431443304846 8.78173460941042  
H 11.30208789872369 8.12631199212154 15.45232504493662  
H 17.14187979142281 20.2325148058273 17.915893758713326  
H 17.85040516657810 18.99104620962823 19.0083396442611  
H 16.35621163301474 19.82115978148104 19.47094027953341  
H 10.4151574 11.49843745306227 9.757591557174941  
H 12.72033693128089 22.29170688546606 12.21427406298816  
H 11.13672753816933 21.84594114361203 11.49292445436028  
H 12.59395129453936 21.79845410132567 10.49310337217839  
H 16.21238923457429 9.81724565512493 17.41971104562609  
H 13.97831798945186 14.06595764849347 4.72370345366338  
H 15.82973276980196 15.85863443083715 4.84995863919276  
H 12.37510374559434 14.84302569413389 4.83096143370774  
H 12.59680890335542 9.35726273085612 10.4358782457845  
184  
./HER\_Domain1\_Site3\_-1205.70414232\_.xyz  
Ru 15.00291459047479 12.74839523935100 15.84094481497359  
Ru 15.23551144250608 12.68861158572527 11.48930877333104  
Ru 15.21873732469324 11.18706938259810 13.66524478168122  
Ru 13.5567989891880 14.92315191506187 15.74488726588793  
Ru 13.71349274322669 14.93741567832012 11.42586802335921  
Ru 12.34571146237722 12.48861676728752 15.67759376590165  
Ru 13.8035333424277 13.4177966417402 13.57889841257516  
Ru 12.51017698737438 12.52644457843324 11.36992356358122  
Ru 12.46370641325681 10.9385274571357 13.54748629821129  
Ru 12.28663924377394 15.6715474271668 13.56395054552579  
Ru 11.14182725698607 13.23228630273576 13.43953811059165  
Ru 8.51274905119515 13.05737944310098 13.39145959457313  
Ru 9.60677004861416 15.29662009886902 13.48720973364078  
Ru 9.80892795670008 10.71157142956102 13.49414331349967  
Ru 10.63635349092321 17.6884568341721 13.55725497979191  
Ru 11.1230895780895 13.6605388817541 9.20809647264114  
Ru 9.8952640515513 12.29723253829827 11.46977430024283  
Ru 9.72524004370778 12.34682698088859 15.45509746304004  
Ru 10.81652626043789 13.15623451984105 17.62231882409537  
Ru 12.52634171298571 15.70947784082454 9.32841013229871  
Ru 10.99460472582746 14.69150191944618 11.29631086502200  
Ru 10.87231517474718 14.68526520904479 15.56103792330859  
Ru 11.99555017615525 15.55100731319681 17.81881769104753  
Ru 12.18885122160839 17.18341375811098 11.48299074104477  
Ru 13.48555932382506 18.10259784934238 13.58956700241093  
Ru 12.04102825921037 17.09442183506349 15.66290236902290  
Ru 11.41928786479234 8.58636703518157 13.57051778668675  
Ru 12.72772745250946 10.99932713718150 9.32231815085291  
Ru 11.30367568039999 10.14370162331956 11.42251048077325  
Ru 11.20993604509105 10.06941917614342 15.63773209090940  
Ru 12.40378428453750 10.94905514166219 17.74142818003966  
Ru 13.85434467195641 13.40636904366772 9.31961206200348  
Ru 13.50876705415509 13.39937096396475 17.87544713858800  
Ru 15.19808060359540 15.60604720510013 9.39355045478724  
Ru 14.98478852321345 15.82625870785830 13.60657175522115  
Ru 14.6188137373951 15.74193311941368 17.89163157633691  
Ru 14.79146478650922 17.31099645382210 11.43287375645545  
Ru 14.47858366936877 17.31186771132229 15.68379485627100  
Ru 14.8905999306073 8.88735482712598 13.55768004289955  
Ru 13.0757949431531 7.91171795274836 15.40416773897161  
Ru 15.25992118732482 11.0715593085989 9.4670859070494  
Ru 13.95397663620137 10.29485493473327 11.45254623710993  
Ru 13.80167023129581 10.26530690975533 15.72486486414376  
Ru 14.90462849564997 11.17219533125972 17.84701632854703  
Ru 16.45590838357062 13.55800767458327 9.42561470901947  
Ru 16.47308001767489 13.4877537718583 13.73231536714401  
Ru 16.07615494217189 13.6836878448593 13.6836878448593  
Ru 16.37476105669066 14.97673848893808 11.52458051116114  
Ru 16.18972512556595 15.06475253981007 15.91497616467000  
Ru 16.51714594211040 9.92872444527380 13.95761991474661  
Ru 16.58713154414297 10.40407121890245 11.71679362339255  
Ru 17.06967667861098 11.23074096892323 13.79749675173021  
Ru 16.45535158612379 10.55570905925916 15.82337331273780  
Ru 17.7705836987372 12.82543614172252 11.62811353007221  
Ru 17.62085871837228 12.7719532931923 15.98235157195094  
C 5.43655086450950 9.98461827036202 13.48946150494143  
C 6.76325090739160 10.69824045482642 13.44376645087610  
C 14.14796391277114 12.02078929930933 22.07387295725853  
C 14.20761224361513 12.14801824540821 20.97248832495544  
C 20.46618300755286 12.63273084881608 8.10463568070962  
C 19.25133521712485 12.74391216720416 8.98724975435112

C 7.37171091845041 15.23517922967885 8.71681948546391  
C 8.67421887059946 14.71425497019721 9.26960725967418  
C 9.80099644847284 20.69693293468533 16.62876662207120  
C 10.31551298825351 19.46412304113966 15.93807130969384  
C 19.14965871304328 17.65163232612300 14.09300819394235  
C 17.8645757742298 16.92977643037489 14.3984706613575  
C 15.34297041396706 16.922305856404 15.88424051967323  
C 15.72676052846494 6.27295194944164 15.40643866441176  
C 14.24273465815686 9.66142768157059 5.45551032209010  
C 14.12657035836903 10.13759110740669 6.87779311701347  
C 21.87484980140800 11.89270794114511 15.43486255006230  
C 20.38853385725598 11.94441629880334 15.20510956466850  
C 8.97807187995134 6.44599620730663 10.67334009912334  
C 9.84769667557103 7.50827983196956 11.29939451406344  
C 9.02447246187472 8.74212228713257 19.29341216170394  
C 9.99937843097893 9.37581909638249 18.33690609296062  
C 10.03829417965717 14.69455286895401 21.63863872370212  
C 10.51833525999995 14.5618742661745 20.21666265401208  
C 17.32486262906216 19.29827287127564 8.45105264004949  
C 16.47081090147633 18.25281911326181 9.13862250796482  
C 16.95376548146935 19.39457137618005 18.63207643664483  
C 16.10970164354520 18.33856857248547 17.96767826268610  
C 12.14645632717347 21.6481777965401 11.44501121241626  
C 12.36495535721830 20.21555397421194 11.85851827878616  
C 13.41291326949885 14.80750469599609 5.1405523301574941  
C 13.41475809151647 4.72630962152065 6.64582583991462  
D 6.72990257120946 11.98445025881109 13.41487679916302  
D 7.82698398484854 9.98744901180389 13.43456709028207  
D 13.49484630226298 13.04903825282210 20.01945640622372  
D 14.96500138269685 11.31567460289958 19.94578697624054  
D 18.13787015145695 13.04769103839965 8.4018666570983  
D 19.37453140514766 12.951508433191 10.23505011609808  
D 9.13366487093008 15.26871578621707 10.32257561163629  
D 9.22966397796390 13.72941352553467 8.66319541584898  
D 11.04273236689653 18.65414478028818 16.61450934306550  
D 10.01708174576039 19.28855957581474 14.70717076966158  
D 16.91683811635349 16.99485121046036 13.55336521923879  
D 17.00811809504176 16.2590531339483 15.40482875602228  
D 10.54566818820281 6.5514333763878 15.8133595170720  
D 16.44579317043011 6.99250908043942 14.62551291231358  
D 15.21276859564383 10.33988247295447 7.52915786533373  
D 12.95666300178685 10.27762199601677 7.38021388363477  
D 10.68739240792586 12.64855961995602 16.0157342858363  
D 19.899134232496429 11.37098371360169 14.23570429233908  
D 10.34474686736490 7.24659455483026 12.4604023819396  
D 10.03484443233158 8.59692522036277 10.67591225284523  
D 9.78212497741258 9.30952904252144 17.09036739270340  
D 11.03230145627624 9.95274362326180 18.8610660949305  
D 10.22409454697776 13.48283930880977 19.59407308800777  
D 11.16121187555129 15.55000705273707 19.71307462925446  
D 10.34656689403405 14.98420657787 9.329332317367  
D 16.21151824348966 17.18132704315764 8.48327970105294  
D 15.85019483914136 17.28222700750974 18.62978130617510  
D 15.68917241620125 18.57551648860148 16.77371838077144  
D 11.95149248171125 19.30128431241756 11.07169547574115  
D 12.94612199068000 20.00744961179409 12.98371566465347  
D 13.070994131662516 19.7921310452788 10.2930632317367  
D 13.74209482451712 13.02109136859628 7.18982542701440  
H 5.57757763448600 8.90102719910778 13.54456523705427  
H 4.85188641439360 10.24066161138917 12.59484868052578  
H 4.86476728119751 10.33285807356590 14.36050760230441  
H 15.11024268542949 11.67243149242269 22.46600691959576  
H 13.38091756835438 11.26824676324610 22.33042411405919  
H 13.86173507105175 12.97380135131527 22.53146153265403  
H 21.29503151184324 12.16778781816278 8.64730263920910  
H 20.76617821831472 13.64010044859251 7.77993700715115  
H 20.22429751756677 12.05584503808802 7.20329700383063  
H 7.17389469508685 14.81553606276244 7.72535817368463  
H 7.4007327254975 16.3310599200035 8.67206205452996  
H 6.5567481434973 14.95066298714795 9.39892599890804  
H 8.8858777151582 21.05675134033265 16.14648408019251  
H 10.56556530847263 21.48530763577804 16.55701748422561  
H 6.62725991839969 20.49203552300132 17.69115715980623  
H 19.72412434819262 17.82776057864060 15.08868469052535  
H 18.94608378037184 18.59453123670343 15.5749504907527  
H 17.8491096130994 17.0193081649792 13.4186507230837  
H 16.8199924386387 4.45996655735876 15.04126070548491  
H 15.59319824020385 4.34409890392514 16.36185120209836  
H 17.13705786233812 5.21262323750701 16.60962694075747  
H 13.30417898827840 9.82530636939271 4.91613086425723  
H 14.46243853879480 8.53808951178578 5.45959745060071  
H 15.0751305254445 10.9164915301768 4.9515733270667  
H 18.13671853475086 14.58302745447642 11.60129175854973  
H 16.2322475996107 9.65136135190850 10.1450666711498  
H 13.68718972021453 17.01137079407189 9.75915541342559  
H 10.29016104355269 14.94131927028954 17.31373690117125  
H 11.3336359804713 16.94983251540036 9.95236670750946  
H 15.22983175925072 16.6147509090959 18.591109091071  
H 9.3259832481611 12.26190819962315 17.22097484459678  
H 18.3221020976607 10.9539074418658 12.03636574093082  
H 22.38902192515817 11.50084548998476 14.55157424356873  
H 22.08048770176717 11.23081137272256 16.29094105890519  
H 22.2507064980373 12.89073017222257 15.69141993169678  
H 17.00408033250445 12.282434537803 17.7253635329841  
H 7.8471691410604 6.6414360535842 9.60366242527037  
H 7.9929244733540 6.4670266575019 11.16275815671927

H 9.41228045111647 5.45648411011957 10.83895569946353  
H 9.00338925127595 17.05590268243594 13.64679217168742  
H 8.77078490989730 9.45065976673319 20.09225438036148  
H 9.497450909471321 7.86819108839758 19.76477787168405  
H 8.12110344514731 8.42279911473215 18.76477336625694  
H 11.11502464727030 14.71584967593821 14.57353019224048  
H 10.55572618254593 15.51444937420939 22.14676638629888  
H 10.19142661665737 13.74981006178910 22.17450427331807  
H 8.95798315484281 14.90197678230738 21.63365362957942  
H 15.01825806945792 18.47480436789688 12.69616392971563  
H 17.39226935663605 19.10271390991383 7.37624376697475  
H 18.33613912128382 19.27133854293695 8.88344878293593  
H 16.91374559211226 20.29782205972789 8.63808147793581  
H 11.31198412444877 8.14595972873677 15.43618340175430  
H 17.20356205394284 20.19482153874104 17.92879802867116  
H 17.86828109520376 18.93754843993500 19.03182649109991  
H 16.39880438736670 19.81502029899869 19.4829214958393  
H 10.48991058427597 11.48368305514813 9.70476236785067  
H 12.6177332965967 22.33676908258171 12.14913688974232  
H 11.06034083544550 21.84803359452583 11.408065207175641  
H 12.53659349136101 21.80515322993254 10.43321630021124  
H 16.21585074165186 9.85705822795537 17.41608666174046  
H 13.988571610701 13.98304349334140 4.70821699749543  
H 13.81660219802390 15.77403972690863 4.81473354258961  
H 12.3737844548 14.74400424065537 4.78441548  
H 12.6270850639046 9.34621690477726 10.46285936494558  
H 10.44464222624108 16.59543106384790 12.18388283202143  
184  
./HER\_Domain1\_Site\_n\_1205.89141565.xyz  
Ru 14.994693348591603 12.72763704504764 15.820884749704859  
Ru 15.2423807779916 12.67716080655295 11.47280496604186  
Ru 15.20646002794792 11.18041628114069 13.64809552147155  
Ru 13.57870279277722 14.91672635360361 15.74467841519437  
Ru 13.69401944438459 14.92828586289538 11.42614548798543  
Ru 12.32667819579140 12.47982473885888 15.67829414700818  
Ru 13.77844317534157 13.39834039527980 13.56204578885534  
Ru 12.48482084943845 12.53102515665671 11.36377082863113  
Ru 12.44324088290814 10.92750623870927 13.5308313143393  
Ru 12.32140215742190 15.65902115280803 13.53424178338768  
Ru 11.10813021464767 13.19535541140895 13.45180699830959  
Ru 8.49135206637371 13.11988144216853 13.34221865713958  
Ru 9.6260443623301 15.30327620739323 13.51238107499385  
Ru 9.83391136127532 10.79482454134298 13.51123299978959  
Ru 10.6636758924910 17.60733532090929 13.46320194118994  
Ru 11.14516238308645 13.11291621281946 9.25206250141746  
Ru 9.86118813191805 12.35243506658455 11.43304636421427  
Ru 9.68881413976610 12.40060601295998 15.49423390055611  
Ru 10.80709967817823 13.14889582606346 17.62828230416345  
Ru 12.52385952871107 15.73517573074874 9.33530991226095  
Ru 11.01620506457389 14.71531258838796 11.33521230987129  
Ru 10.89525420809089 14.68908754804922 15.5624468123386  
Ru 12.0092851189593 15.53971877765944 17.81699558743173  
Ru 12.2019251836921 17.18235610950065 11.49814328939600  
Ru 13.49036598133448 18.08297754532445 13.64160190397615  
Ru 12.02360949898184 17.08638106635880 15.62803899443531  
Ru 11.39336908153442 8.59368177260311 13.57911884658096  
Ru 12.7396238566350 11.0652975450853 9.4124231212017  
Ru 11.31267640170856 10.09720155457331 11.36081058883236  
Ru 11.17932192808118 10.06586514669996 15.63823693678625  
Ru 12.39306521215624 10.94182759576359 17.73781815089326  
Ru 13.86355912975772 13.43950203268717 9.30653528951412  
Ru 13.50837083091481 13.38741312954808 17.95485493395979  
Ru 15.21493795506992 15.62368824450024 9.4124231212017  
Ru 14.97708812366751 15.81670127940266 13.59691181793016  
Ru 14.63760846548485 15.72474785920655 17.89420023657647  
Ru 14.83269142497298 17.30633817884019 11.47479221258701  
Ru 14.51084797691379 17.29845740516574 15.68725349575334  
Ru 14.06481126069523 8.89340434945175 13.54920964714668  
Ru 13.01990377070168 7.90758458455246 15.47406127378511  
Ru 15.2552260467306 11.08943249711134 9.43384215530085  
Ru 13.94046442316510 10.31553096189171 11.42233953340978  
Ru 13.78704715493331 10.26076659600150 15.70046190614187  
Ru 14.89351858317048 11.14687848145767 17.82954288884349  
Ru 16.45388135245930 13.57486527642831 9.41408038864060  
Ru 16.47080497303222 13.48239416598069 13.71644462176049  
Ru 16.07641230757921 13.65766026121922 17.88038080650333  
Ru 16.37451923711212 14.08069892390672 11.52932170406376  
Ru 16.20688594063296 15.04478076502495 15.90889269760370  
Ru 16.49093151672017 8.91213832714191 13.94552069541354  
Ru 16.57078287891231 10.40745470439174 11.609292557229240  
Ru 17.8474244398851 11.2077175719949 13.7908266243995  
Ru 16.44113401270311 10.53334568299912 15.81049214635988  
Ru 17.77203236834044 12.82777370217720 11.61523136147609  
Ru 17.62631126086649 12.76369859809422 15.95644759880911  
C 5.40172368604254 10.12176467840557 13.84368867112947  
C 6.74133708605883 10.80703238473773 13.73858693971843  
C 14.15165416118638 12.00159170364766 22.0573543045406  
C 14.20491649080862 12.1309465016386 20.55612915460606  
C 20.47066520371453 12.65219103958411 8.0923529318947  
C 19.25384745356717 12.76256413251734 8.97255017635841  
C 7.38108753177148 15.30286047769765 8.7872866610892  
C 8.68380429126465 14.7742219721238 9.33103936509342  
C 9.6610768979369 20.66131732902792 16.43329755327521  
C 10.27421481457773 19.42758471345457 15.76722831532401  
C 19.1931659565987 17.64281863865130 14.15493805499710  
C 17.8995507179840 16.92239483103178 14.43287363984375

C 16.30956445093228 4.96908075650636 15.88561607241934  
C 15.69755229164484 6.26184591708951 15.40652366024895  
C 14.23045721680177 9.67818926686680 5.42649058626870  
C 14.11836760775631 10.16534480566632 6.84515539060563  
C 21.8698379896376 11.85887482290620 15.39484844636869  
C 20.38187070997284 11.52225248 11.90810038930341  
C 17.222041234763 6.29902256019656 10.65430287834  
C 9.96849810001293 7.39355397230083 11.2577916916710  
C 9.00875625937880 8.74487268718857 19.30066516192288  
C 9.98093471513896 9.3853928425136 18.34543756966552  
C 10.00919061164372 14.72444328424980 21.62822370830641  
C 10.50281999926775 14.57888813645110 20.21224071617719  
C 17.31485293068522 19.31966631369994 8.46606362429883  
C 16.47608048803935 18.2718362408322 9.14953146041005  
C 16.96250108869263 19.38417147753065 18.65093118737844  
C 16.12164847719749 18.32792133652386 17.982805067039008  
C 12.10387275417720 21.64187417025340 11.52243238517674  
C 12.34213261888265 20.20681294077094 11.91871805589929  
C 13.44036791507243 14.88759606137841 5.14150554253732  
C 13.44083554108958 14.79485853191771 6.64595796106232  
C 0.671174947006875 12.09367346524861 13.5923568100811  
C 7.78979554375743 10.09234648315300 13.78936660591006  
C 13.51072593653851 13.04767108867323 20.00746080406810  
C 14.94294095165346 11.28263979263259 19.92523240999887  
C 18.15038317444531 13.11202991334308 8.35266000000000  
C 9.36487917964459 2.52537284420964 10.2179319151519  
C 9.17349379447280 15.34690798446749 10.35806209529763  
C 9.20818097888299 13.75915200043297 8.74116775997279  
C 10.94873266527335 18.65147916391810 16.47023658272698  
C 9.92017600557580 19.22692265661437 14.53816803719267  
C 16.95998078099124 17.00378579840510 13.58472140909663  
C 17.83180918454022 12.3345453653812 15.51936611700053  
C 14.51407827078177 6.53874414965661 15.80976501983370  
C 16.42153714474625 6.98114320092975 14.63197558995465  
C 15.20597532011777 10.36435638089582 7.49621000262611  
C 12.95095560276040 10.31893101821514 7.34860252322255  
C 10.198716329292248 12.61787905155687 15.98856206582101  
C 19.08473099481650 11.22907182147380 14.2146892059015  
C 9.17369815314248 7.2104253327345 12.46674830942452  
C 10.21408567535026 8.42806263686660 10.5680186903991  
C 9.77380037435764 9.3018339887760 17.09765127469858  
C 11.00850793554397 9.98423869472314 18.86947623924286  
C 10.22479196761230 13.48834146069645 19.60153886115032  
C 11.141818181500524 15.56527478044772 19.7024662171501  
C 16.14632596633076 18.49385151586668 10.36562217037990  
C 16.16620646209590 17.22171547184827 8.4829719692633  
C 15.86663336430770 17.27004638605806 18.64034152708542  
C 15.70422498636883 18.56510693088586 16.78754054996478  
C 11.94238889685721 19.29972177387458 11.11406235957472  
C 12.92238739977269 19.90995733201168 13.0420545080803  
C 15.99052809748369 15.5624468123386 7.29356831810089  
C 13.76935846125656 13.68128290726072 7.17871920668452  
H 5.52654766893107 9.0504484655525 14.02748825324393  
H 4.84579287643644 10.27470264858719 12.90764803538263  
H 4.81217852941233 10.5796043119355 14.64913758941137  
H 15.11273214594994 11.64370725165782 22.44388086738526  
H 13.38557129569300 12.2549742207659 22.3163508603932  
H 8.8765706595200 12.95640927195300 22.5177305321295  
H 21.29662793857060 12.18261936407328 8.63534864687137  
H 20.77354686185689 13.65891713721959 7.76914954447565  
H 20.22956650519457 12.07724525897737 7.18931010201653  
H 7.18373207562821 14.9017752811962 7.78002891658766  
H 7.40633768172765 16.39921487245654 8.76610733067023  
H 6.56560463753338 15.00443047269497 9.46252929510981  
H 8.75644895023304 21.00831512629129 15.92295310554683  
H 10.4216777470367 21.45473580316071 16.37495580060854  
H 9.46131279783590 20.46507406600288 17.49276609661224  
H 19.75574245119554 17.80686615785833 15.08030756829655  
H 18.99450965700979 18.59158586223320 13.6440931007933  
H 19.79916213990764 17.01616000772226 13.48257994049828  
H 16.78458417025574 4.44723293288696 15.04512957016757  
H 15.55624941429231 4.33107048528701 16.35815283080560  
H 17.09930951451222 5.19822146134278 16.61631149593067  
H 13.29149475417308 9.84127659293016 4.88764989908314  
H 14.44644350301973 8.5992192112631 5.43792409745510  
H 15.06363245719261 17.770344677061 4.91780492779745  
H 18.13621724693335 18.8465838616043 11.5454931546043  
H 16.21527416092635 9.6572112363838 10.12574026037642  
H 13.69421934253790 17.02333534149229 9.81490758726638  
H 10.31245452764853 14.96921809964934 17.30451597259561  
H 11.30313293999116 16.93572595628849 10.00188156692557  
H 15.054029074914527 15.81049214635988 19.70424249098979  
H 9.31654234941871 12.23738906066582 17.26447717592575  
H 18.30432206033856 10.95035078487296 12.03241498579763  
H 22.37760113995861 11.45918644822641 14.51144564722258  
H 22.08194286595731 11.20732780542559 16.25552104543282  
H 22.24697143655623 12.85939734588790 15.63942200036573  
H 17.78672084102961 13.15335854902511 17.7409465201266  
H 8.12641360432880 6.33391771002416 11.10998049037762  
H 9.55944082551575 5.31741099935208 10.88476024347525  
H 9.00314630766207 17.00350435510924 13.30146576779707  
H 8.75477959565654 9.44472521688865 20.10405497612690  
H 9.40483859243733 7.86510293153401 19.70424249098979  
H 11.895787683042 8.4264240987081 18.7701523415588  
H 11.30403076961358 14.76652845600000 8.56195763173356

H 10.51487854373281 15.55482511736341 22.13164301507943  
H 10.16615847638584 13.7847780431929 22.17646854609519  
H 8.92707086168152 14.92178145486310 21.61144274522363  
H 15.01369745247059 18.49621496790804 12.72617449274728  
H 17.36705209397441 19.13271746903265 7.38886218977307  
H 15.3309959490617 19.28950724575285 8.88613576540971  
H 16.98723096068441 20.31847347399122 8.6654964248737  
H 11.28967094241406 8.13933104804661 15.43192018461495  
H 17.21087480904450 20.18715533494231 17.95028869262825  
H 17.87807389628095 18.92814652770711 19.04967526571940  
H 16.40613127079519 19.80845107358080 19.50272496829444  
H 16.65458822673481 11.44474295664834 9.6590321612918  
H 12.40206969122391 14.81737018938342 4.78425954116413  
H 11.02173689661797 21.82760627167554 11.47373492708675  
H 12.51056239853894 21.81707308158122 10.51767072641771  
H 16.22231817954746 9.84021220957762 17.40611088355897  
H 14.02376789879089 14.07244614163993 4.70172391199380  
H 13.83423786645809 15.86998598922627 4.82518607863652  
H 12.47509136046814 10.94113692067106 13.55315662732505  
H 12.65739614696407 9.29946351658491 10.52881215665204  
H 9.453080321593936 10.52383832965929 11.77203251211596  
182  
./HER\_Domain1\_Site5\_1198\_23692861.xyz  
Ru 15.80738518793485 12.76416243408346 15.84161648849896  
Ru 15.241683798098485 11.4780693681886  
Ru 15.24664824187337 11.17498433453676 13.68225478204791  
Ru 13.58029626833264 14.93396778527545 15.75410463320643  
Ru 13.70388136923671 14.92021032343007 11.43584078350157  
Ru 12.35075886928772 12.48385234822092 15.69354258849554  
Ru 13.8078455146665 13.39041133482568 13.58205544351804  
Ru 12.59033855393384 12.5437330765170 11.39284213364083  
Ru 12.40209136046814 10.94113692067106 13.55315662732505  
Ru 12.31701517733788 15.64580643392392 13.54211164248685  
Ru 11.15314522346912 13.21803643052499 13.46767022437776  
Ru 8.50916778141997 13.05863404132112 13.38413297977392  
Ru 9.63720078538512 15.28915920486203 13.51531674091579  
Ru 9.83076608139223 10.72406651126177 13.50071083322234  
Ru 10.47804755340562 17.68139916368059 13.45524301945348  
Ru 11.13359790880714 13.07831133907635 9.27911635417047  
Ru 9.88711039724711 12.31237162002087 11.48087350279304  
Ru 9.73929195295339 12.35663839425126 15.46806930583368  
Ru 10.83195949455751 13.147059339654751 17.64378533669918  
Ru 12.51384275894747 15.71860291401858 9.35207808245278  
Ru 11.00686408230145 14.79139955047655 11.34735752609794  
Ru 10.9619604879649 14.68416929396899 15.57974620899668  
Ru 12.03265940648611 15.53604386903385 17.84292083223935  
Ru 12.17841301323216 17.18006127836169 11.50328289724892  
Ru 13.50939322477681 18.08117165261564 13.63288183291908  
Ru 12.0312105145833 10.8883634688169 15.6309570900014  
Ru 11.42845105619523 7.586615357584341 13.57923492314177  
Ru 12.73616084668738 11.02806711531948 13.649467089525  
Ru 11.3228741154589 10.13814115807897 11.41871966316320  
Ru 11.22914303040125 10.06129072835623 15.65311937455436  
Ru 12.43196095205213 10.94568533585351 17.75484851073073  
Ru 13.84911660293396 13.43174915449456 9.30929208802272  
Ru 13.51287936264762 13.40572199269882 17.86460031362997  
Ru 11.20337381295811 15.68066121181799 15.40701311825178  
Ru 14.99897318265857 15.80871388351338 13.59775782112905  
Ru 14.66146428923111 15.73984091837789 17.89567548423859  
Ru 14.83363052716493 17.29464143334643 11.47132620045767  
Ru 14.51722299733274 17.31052976032682 15.67397375522181  
Ru 14.10432342968183 8.88944346150238 13.56409326250719  
Ru 13.94294099453081 7.90694447201798 15.48623773135522  
Ru 15.2536337276176 11.07617685587772 9.46265417190523  
Ru 13.96164656371585 10.30105152663415 11.46729277831333  
Ru 13.80448773130555 10.26917365178371 15.72559184649686  
Ru 14.94860417284475 11.17092058769358 17.81449956949918  
Ru 16.44243537639778 13.55783909988884 9.40182388911212  
Ru 16.48671565101345 13.48347263757972 13.71409305789124  
Ru 16.09166010377881 13.67419321165796 17.90769087460435  
Ru 16.37689427460236 14.97864048272109 11.51709958242748  
Ru 16.21730697412934 15.06473421418842 15.90925782337956  
Ru 16.54295921328132 8.91714843035467 14.01758971912788  
Ru 16.5864666857149 10.41938906406494 11.71085519039138  
Ru 17.06291629251316 11.21184992349762 13.79010580975526  
Ru 16.26446258725170 12.1354308082468 20.5661339489048  
Ru 17.76904638877723 12.82284083227584 11.60226278367922  
Ru 17.62044782285408 12.74087988268644 15.98660774633116  
C 5.44724356438972 9.98758802817018 13.53815223342350  
C 6.77154599369881 10.70595289479681 13.49627390969403  
C 14.2279747391081 11.98616173462522 22.06567023329895  
C 10.2122562910317 19.42631277858480 15.7638492800326  
C 20.46929191616145 12.68053884132308 8.08609127828624  
C 19.25033206561855 12.77294480428206 8.95977953257231  
C 7.37973940674106 15.28210648455947 8.80071495981463  
C 8.68216515703514 14.74923029043638 9.34129799436517  
C 9.66942657980165 20.6630596567243 16.42661468463485  
C 10.2122562910317 19.42631277858480 15.7638492800326  
C 19.1932172358540 17.66531279139080 14.1470381484337  
C 17.90133665184060 16.94549629575969 14.43264463674865  
C 16.30366091514822 4.9308206421298 15.87131696114286  
C 15.71554041122053 6.2449615777329 15.42266787884578  
C 14.20625627881319 9.65232628608102 5.46227949254895  
C 14.10122562910317 19.42631277858480 15.7638492800326  
C 21.87302711385471 11.86433434237086 15.8473702304326  
C 20.38556890863789 11.90772956989177 15.21773610755756

C 8.950512315660237 6.47828310175597 10.6930945388622  
C 9.82245020781797 7.53197236135681 11.32239462336329  
C 9.02972673648444 8.74474118694777 19.2873560437928  
C 10.00856424600524 9.37929718497437 18.33529920993158  
C 10.0054901645730 14.73030042344505 21.64359676941750  
C 10.50253665870395 14.57890352525031 20.22883186233494  
C 17.3374243944018495 19.3362399247983 8.46918627109554  
C 16.49201315015365 18.24278359962562 9.14921424917723  
C 16.9350957369190 19.43157560738249 18.64306162486062  
C 16.10689287429194 18.36595202505132 17.97488221359183  
C 12.130699717631923 21.643831003204295 11.51713885349851  
C 12.36879354324139 20.2078579692985 11.911347062237370  
C 13.39708066811099 14.8874303571982 12.5590265729968  
C 13.406080285481845 14.78895715204066 6.65492921417898  
C 6.72987495854980 11.99413472869782 13.47568287685072  
C 7.83725374837747 10.00134260176621 13.47846398061889  
C 13.54794079917345 13.03930455824666 20.03193778844214  
C 15.01678285116087 11.30556996550773 19.91950112598743  
C 18.14117642164707 13.0906930605526 8.37897765363263  
C 19.36468859367691 12.54216617114849 10.20258633764405  
C 9.1618118678873 15.3075351353733 10.38283027782401  
C 9.21601080847664 13.75078296981054 8.73599247510550  
C 10.95208764999842 18.64967725778489 16.46928253627228  
C 9.92416381029420 19.2223953329599 14.53536130177868  
C 16.4965987068607538 17.04449632692538 13.6017322121210  
C 17.84821577892989 16.23699266385620 15.80776770680857  
C 14.53177958163309 6.53014803335648 15.8182257698464  
C 16.4583438026388 6.97668382196564 14.67723361966796  
C 15.19660241707353 10.35158208694386 7.52133091651522  
C 12.94219206036155 10.31346309620807 7.3877733963129  
C 19.6865689961559 12.62204624463132 16.02336521382184  
C 19.8953181818193 11.22131024899057 14.25871376933817  
C 10.33466081655331 7.25989373509261 12.47407187749714  
C 9.99913355200478 6.62866278380977 10.70876697032707  
C 9.78894328298505 9.31736440867645 17.08733955324955  
C 11.004419982877861 9.94697442079638 18.86032915948507  
C 10.21341953123055 13.49539891055245 19.61523778196039  
C 11.150241564646928 15.5609200577007 19.7254522706616  
C 16.16485422801512 18.45935056039477 10.3686523946523  
C 16.16746372727463 17.20049715150593 8.47807553261696  
C 15.84716459952921 17.3111693847519 18.63967471131308  
C 15.69979572980860 18.59066085118250 16.77461603932292  
C 12.00019695335730 19.30254274304194 11.09094026580836  
C 12.3471815742123120 19.30985993083509 13.05110125650223  
C 13.06133375177484 15.8411263138838 7.30744458929536  
C 13.73806705989379 13.67388608452329 7.18249440104499  
H 5.9204812649235 8.90547386029973 13.6102840040361  
H 4.87433937935260 10.22694711492848 12.63112994558929  
H 4.86193194155689 10.34748987032824 14.390504625834951  
H 15.19286520525774 11.62429631817524 22.43887556232541  
H 17.992098992337 13.23629268982117 16.980788911116  
H 13.95547255168996 12.9347856521889 22.54108739065082  
H 21.29839794340736 12.21193357180168 8.61968852162942  
H 20.76524535466322 13.69350795779401 7.77022405903754  
H 20.23418307704245 12.11474315990242 7.17035845532783  
H 7.17577898338779 14.87560592669059 7.80501717824877  
H 11.412328270695928 12.822096707691 8.77059611969717  
H 6.56544618562256 14.9580935558929 9.48244760074958  
H 8.76367151103566 21.0090605462639 15.91733012247841  
H 10.43037519749147 21.45569089716708 16.36293992851792  
H 9.47202428722890 20.47145516872656 17.48737017978299  
H 19.76442923106607 17.82337882077795 15.06831921837194  
H 18.99204028247911 18.6172871115854 13.6427586423045  
H 19.79245441055102 17.04042594786143 13.46691061721374  
H 16.74653836595650 4.41021895946051 15.01232009820940  
H 15.54329888357962 4.30411617361637 16.34743942273875  
H 17.1153690453384 5.12557817419706 16.58747570387441  
H 13.2010636729916 9.80395125844907 4.93116809999777  
H 14.43090831337307 8.57509974202049 5.48106711710217  
H 15.03058506313408 10.1361757548727 4.9409894184858  
H 18.13452688277493 14.5908477542054 11.58482253101828  
H 16.14854285235989 9.61029383635726 10.19994165153244  
H 13.67694094511083 17.01418124444329 9.83279838651576  
H 10.33353782906531 14.93890446457329 17.3070864172007  
H 11.28660614501177 16.93117517703961 10.0089576690802  
H 17.79916436768594 13.435259149723 17.7521613610552  
H 9.3423284323838 12.2604229255917 17.24684317013222  
H 18.34693021641230 10.95087681130682 12.07349820534538  
H 22.38619678636520 11.45591105162173 14.56808991605167  
H 22.08407951547789 11.22474676247572 16.31429476673293  
H 22.24600246327491 12.8693518705991 15.67758805797579  
H 17.79916436768594 13.435259149723 17.7521613610552  
H 8.82296331215746 6.67206287440182 9.62340347060196  
H 7.96381262217372 6.49823768579035 11.17928644895204  
H 9.8120679894553 5.48320275270830 10.85086294086055  
H 9.02025202882225 16.99983428968669 13.27461783608455  
H 8.79873894468367 9.43867005897551 20.10543707008342  
H 9.48685845024631 7.84942423193154 19.73200763340095  
H 11.15194522457229 14.7188848195870 8.57596261719231  
H 10.52039523303330 15.55308752531192 22.14952965459042  
H 10.14693589765058 13.79667046557598 22.19140629846665  
H 8.92635854574347 14.9427383342871 21.62246714196966  
H 14.43090831337307 8.57509974202049 5.48106711710217  
H 17.41073229078754 19.08829210853016 7.39551267835787  
H 18.34409017478486 19.27153402870021 8.910801807803356

H 16.91811436262828 20.28560947653640 8.64901796618951  
H 11.31957339856630 8.13751614977705 15.44451713839048  
H 17.16566711275929 20.24262029952392 17.94529738207258  
H 17.86283092366083 18.987685664682170 19.029546780747205  
H 16.38192057729474 19.83276068895621 19.50340831947176  
H 10.54442556466777 11.44918715221340 9.80764023227773  
H 12.59567190215662 22.327805568229080 11.44325302180  
H 11.04755488435907 21.83073521768378 11.47969715580419  
H 12.52724601489108 21.81983335245238 10.50996510477156  
H 13.96623404385054 14.06619183208677 4.70409398438018  
H 13.80327465612853 15.856332074252799 4.83610996081336  
H 12.35557720312760 14.83439738984916 4.8061470617597  
H 12.59579131453779 9.35066752869566 10.43484360394749

117

./HER\_Domain4\_Site1\_-686.90487371.xyz

Ru 15.25104401331038 13.22485272810479 15.29701804969312  
Ru 15.27330007182797 13.46938113044031 10.89383057797424  
Ru 15.32206836613046 11.82891693686682 13.02807682952449  
H 14.74610581162278 15.52403816447324 15.05117752725497  
Ru 13.71242543634635 15.85700427353347 11.02836177209652  
Ru 12.48562714471759 13.14007730577867 15.29803252553433  
Ru 13.91305667809422 14.14717226185302 13.13035494587683  
Ru 12.49207090275532 13.44859839780053 10.90419480286976  
Ru 12.64976390837027 11.80247825634359 12.96379275883278  
Ru 12.41789263134062 16.41091161093986 12.30966322128093  
H 11.23711962456193 4.02635536286520 13.1342726812094  
Ru 8.48622593280256 13.94618039163095 13.04762811482737  
Ru 9.70639465716305 16.17208032231257 13.31412088771214  
Ru 9.780296307809575 11.53464248699224 12.99837198196802  
Ru 10.91950954831225 18.44764664100317 13.41801096239875  
Ru 11.08806619156940 14.23855872769576 8.9546899678471  
H 9.80892088339124 13.2029156652595 11.00971148022706  
Ru 9.89576191639639 13.0026949039769 15.06553676524237  
Ru 11.12707257268418 13.64327937086749 17.34508265953124  
Ru 12.32526508650079 16.61675080404663 9.05801999234890  
Ru 11.06157537668962 15.6488161365960 11.17302781227498  
Ru 11.89659742802126 15.37288749791038 15.3462021936519  
Ru 12.37612689172114 16.03258709962868 17.52255756298401  
Ru 12.30713015508655 18.02343962373540 11.23804065308026  
Ru 13.52628029986017 18.86142329282776 13.45680575762447  
Ru 12.35857811067795 17.73417455305718 15.53959561525914  
Ru 11.31349612661680 9.31301231559118 12.87740226859911  
Ru 12.55068658575647 11.99635850653777 8.80318354936382  
Ru 11.25955678080479 11.09545613722117 10.92483755257088  
Ru 11.32598902086532 8.82049258855322 4.91366493574208  
Ru 12.51135309645684 11.39405978157943 17.23720774790059  
Ru 13.74931155259980 14.36006693321196 8.80429159129907  
Ru 13.79471066303854 13.73885154524216 17.47913896661590  
Ru 14.9622588721761 16.75858063623659 9.02878136174452  
Ru 15.07591932623663 16.56909391720469 13.3090881012169  
Ru 14.30644438494020 15.16461570601366 17.5699082113550  
Ru 14.85905233684746 18.10806168415514 11.29299088145215  
Ru 14.87033776071712 17.83368378854120 15.50856402320584  
Ru 14.04799581017321 9.44930706556933 12.9911822409397  
Ru 12.55993197751379 8.69401878978206 15.16524879437986  
Ru 15.20745999921464 12.1618985632849 8.74361697147959  
Ru 14.0439028987725 11.08512325251818 10.85028919342466  
Ru 13.93317084078099 10.8998020572801 15.07387656013755  
Ru 15.29471514256008 11.5898633958185 17.20140681859925  
Ru 16.39891816906860 14.53067451438582 8.88715263130338  
Ru 16.55356243104133 14.34158026111247 13.16361067478991  
Ru 16.46165647872639 13.93709374319961 17.3859945821868  
Ru 16.38854078080729 15.95759053689020 11.17078439030226  
Ru 16.37511798383320 15.66962116367826 15.3421624230224  
Ru 16.54689873053772 9.63599210429457 12.8566699892663  
Ru 16.65072430237575 11.30918636524036 10.77858232611057  
Ru 18.01433270102474 11.91133682014233 12.94462561500238  
Ru 16.65076264736059 11.04814276489088 15.06648425340072  
Ru 17.7933182348067 13.75376364267522 10.9956093351352  
Ru 17.77820359212224 13.40104418905000 15.16683675045037  
C 12.38229478157226 7.45462704099520 19.34307600930025  
C 12.45160387797469 8.42738159355218 18.19668359278199  
C 12.35581664047265 7.91646325863405 17.01182218195023  
D 12.59989113919405 9.659776208080357 18.45199854571345  
H 6.87858086782712 13.94775144070171 13.10581666537038  
H 9.54541456220858 8.0607523209974 15.8525594548918  
H 8.01002537144111 15.58047897200795 13.50685706135776  
H 9.58043379343640 17.69187963925080 14.34265366020070  
H 8.32268272022778 12.42359221583795 12.09369878514405  
H 9.48568327952460 13.23870025756641 16.81124243175278  
H 10.56699154529128 15.9854191284134 9.34945951265328  
H 9.66318510464388 17.7187544211554 13.3778800271517  
H 9.43905381595890 13.70169304539881 9.4077517885488  
H 10.60160659284142 15.42119847597972 17.16810512684878  
H 11.76180089854408 18.22515642937541 9.51886635008531  
H 12.02249214918946 19.50321409659059 12.3791955016740  
H 11.7357256032684 17.66233147617444 17.2291330232518  
H 11.14740911738098 12.71735208708782 7.97358019030657  
H 10.53869402856190 9.46462771137577 11.2614254689618  
H 11.43560638512202 10.64951313095469 9.19887490427667  
H 9.66771337246641 9.69597252961037 13.27605452579428  
H 11.02006744218600 10.70672111463550 16.71911964990813  
H 12.37273508838666 15.12474110058999 7.84204813424328  
H 12.41470364790695 14.37603647906956 10.5349241126917  
H 13.62046678663959 17.51562007606141 8.15650156653289  
H 13.68034900757801 16.86016285067724 15.10899520245053

H 14.82439236950353 19.50597111598566 12.43473058710716  
H 15.26721338550343 18.4030647196764 9.53849066555362  
H 16.65513929710529 17.63025414902368 11.64755229763152  
H 14.7529352192686 19.40786637888844 14.62167756526748  
H 13.95084124842065 10.77163534677722 8.9840662213736  
H 12.80936340456787 9.60216245533158 11.6708363497575  
H 12.15947669077772 12.23449209077772 9.143523502180  
H 13.88996615656651 12.10957052494277 18.3546329619518  
H 15.10525602935156 15.29869877214465 7.81871163883959  
H 16.58143134746940 12.36388326863648 18.2263943295821  
H 18.09388466843605 15.8186633077138 11.36978957651057  
H 15.3808429439917 17.86282711077210 17.23310285776807  
H 15.43133455253331 8.31405536606461 13.179028265232  
H 16.64573927259888 11.13510449542221 8.99828674828181  
H 15.45189837814223 9.94317958592489 10.90583146182228  
H 18.22774839456741 10.22675715998260 12.4264971579217  
H 16.48042874691371 10.35037330063989 16.70396682802917  
H 17.29625332910276 9.37951095215601 14.35353701438640  
H 18.08311079310430 14.12055320296518 9.25793519736528  
H 18.38904337765300 12.00405090665140 11.10546361859650  
H 18.47747846434365 13.57883123286378 13.37289356261204  
H 18.46975297907484 11.61761891820871 14.63909846346328  
H 8.10532978530094 12.98442310964456 14.38979562020740  
H 11.94409652939892 19.33671511202099 14.61677885959620  
H 11.125137028048991 12.14518045170568 18.23964320522  
H 15.1308148388255 4.5695288042465 18.5537987895219  
H 12.72611292614569 8.1731918193755 13.4229844308141  
H 16.4857305530971 13.08979912333041 7.85832923617487  
H 16.7866815293114 16.3297725008661 9.38893655986488  
H 16.81625240832095 15.7870299965122 17.15162793171880  
H 18.1498255743483 13.69131947088472 16.90350247608415  
H 12.55095765284325 7.90312734314639 20.295433414575  
H 13.12120806494045 6.65631791261823 19.1936254263618  
H 11.38998976232917 6.98079528078325 19.35417197359471  
H 16.62631449007700 17.3841843655744 14.97850827944256  
H 13.8001055284861 12.87515003041445 7.67826716780433

115

./HER\_Domain5\_Site2\_-678.84020763.xyz

Ru 15.2440556543139 13.2639317458820 15.32785260074814  
Ru 15.27324034614998 13.48708381452374 10.89875962490331  
Ru 15.3414806272432 11.85978245134430 13.03545758070522  
Ru 13.72785104819692 15.4888113349442 15.46619499075671  
Ru 13.70816708859389 15.85160076881635 11.01911484668818  
Ru 12.46773021409541 14.1452570831926 15.2066309664540  
Ru 13.91385921347572 14.13873071768624 13.12830969757575  
Ru 12.50846265135405 13.44891885662957 10.91004862557618  
Ru 12.65564039688827 11.80173054261230 12.96729607687915  
Ru 12.40997311213766 16.40997759515727 13.31104330190943  
Ru 11.23794830193899 14.02995385822378 13.12564682848094  
Ru 8.4906940304813 13.9575690734792 13.02752083604046  
Ru 7.09690807738748 18.6293073210063 13.337324368080  
Ru 9.77459545454050 11.52566042738155 12.9839134920963  
Ru 10.92858945005200 18.45834287504938 13.42048627792104  
Ru 11.10835869166482 14.208949078023663 8.94780824144229  
Ru 9.91272181313730 13.18194984476377 11.05776206070733  
Ru 9.88736244724648 13.01805584764441 15.05841351293484  
Ru 11.72121819720456 16.6529431636701 13.2312165657441  
Ru 12.30788513986176 16.00218084475949 9.0542688228572  
Ru 11.05163837559166 15.6607570633070 11.17087035220846  
Ru 11.08555418133131 15.36681486970296 15.34528055979668  
Ru 12.36246497717516 16.04873547733074 17.53062359320942  
Ru 12.39468744558172 18.02106868647077 11.24690046809159  
Ru 13.53084330265659 18.8784290319855 13.45291990898549  
Ru 12.36258069450270 17.7277796063104 15.54164669299716  
Ru 11.31384439708659 9.30551039895700 12.89168764371705  
Ru 12.57749246488079 12.01162795142183 8.82075809002890  
Ru 11.27373488648114 11.07147937123815 10.91996477993408  
Ru 11.3082669824437 10.83426851449564 14.90910383498346  
Ru 12.48263591067011 11.3757398815393 17.23211604067278  
Ru 13.74421827855002 14.34975849895239 8.02185327814604  
Ru 13.79754203201579 13.74656893634721 17.48881527757680  
Ru 14.94318081272100 16.760971616870920 9.030243563613  
Ru 15.07229160784193 16.50966235074528 13.32208713450272  
Ru 14.98773756773952 16.15171007527696 17.56409318927802  
Ru 14.86222836089091 18.10812684562324 11.30798263251942  
Ru 14.83621867974436 17.821412072182660 15.5024250317440  
Ru 14.05246754542209 9.45620897798423 13.0050602417695  
Ru 12.50924262019589 8.71397845254032 15.18150010940809  
Ru 15.17097080623835 12.1963372165417 8.75876120305411  
Ru 14.01752006555570 11.10046485671199 10.87499642191031  
Ru 13.92952017012588 10.90626772883188 15.08068089571199  
Ru 15.26070877949008 17.7187800271517 17.19490826630697  
Ru 16.38374807348927 14.53857955448848 8.87266260642792  
Ru 16.56891238143974 14.34071396330726 13.14675321541531  
Ru 16.46879522679428 13.91603866944227 17.40623800527483  
Ru 16.38922331380579 15.97115258471577 11.17007037622143  
Ru 16.34168967768814 15.62768733065491 15.32540213212913  
Ru 16.54540336773703 9.65706313206137 12.0304211609446  
Ru 16.65290607812620 11.32260735716228 10.75458747316138  
Ru 18.01559672818204 11.91930676274119 12.93107020391909  
Ru 16.66236237280006 11.05580476391057 15.05911054840855  
Ru 17.79826349346285 13.76124405745898 10.97499315746652  
Ru 17.7704678072625 13.39213354563985 15.17935762596308  
Ru 12.47498631708099 18.5349241126917 19.3590931206349  
C 12.44585892673806 8.41638267638400 18.20610870868707  
D 12.38678359145602 7.9046580661664 17.0190832031126

O 12.55857181328451 9.65095948140492 18.46556331342461  
H 6.88452163020865 13.95284695345988 13.10897443330660  
H 10.52602021313537 8.01012680271115 13.46715769092607  
H 8.00001975724174 15.58672004015986 13.46166936704847  
H 9.57127000981702 17.73682879660015 14.33577235362676  
H 8.31653661030664 12.4356793146180 12.08295467518000  
H 9.480404129121272 13.21909729995103 16.80990190326809  
H 10.56336464744041 15.97233496252577 9.33844699861019  
H 9.69092114903743 17.72551852891297 12.33532138489300  
H 9.45940389921252 13.65738955101237 9.39822595657848  
H 10.59246902449953 15.42978246703574 17.17073152562084  
H 11.77773727998595 18.1297393774876 9.51812639786442  
H 12.01615557159271 19.50901594858863 12.38178059541873  
H 11.77399066451076 17.68515859345639 17.25656803881672  
H 11.20386001466443 12.74405448747578 7.92094815408355  
H 10.52312321154737 9.47493891466579 11.26980953866011  
H 11.482626298960550 10.60833076537236 9.2205672229287  
H 9.6636115471646 9.68584776466978 13.27087069713883  
H 10.9909918591250 10.66469256316602 16.72359758033960  
H 12.35792838672274 15.10556602374574 7.83970700121089  
H 12.3771313713434 14.38328929411172 13.53454170314281  
H 13.61975267666919 17.49839166848320 8.14169262863679  
H 13.66671812849365 16.88357230029452 18.408933625958899  
H 14.80191107959922 19.54302916744559 12.41368229336483  
H 15.21493587091818 18.4010509303531 18.4010509303531  
H 16.6595219035283 17.66231144389128 11.59258597985307  
H 14.83669491355798 19.37183280643722 14.58056186733375  
H 13.96817050948317 10.78053619460528 8.98174182477942  
H 12.82529336692240 9.65879473927906 11.69940280095460  
H 14.16299961973371 9.13301315301545 15.49385190977975  
H 13.86855787360207 12.09117040549805 18.34510870514557  
H 15.09724057772829 15.3029813806424 17.81367705311111  
H 16.61266045205385 12.33837099490668 18.18804641090491  
H 18.09558606701086 15.52692291055789 11.35469721159137  
H 15.52469918547516 17.83036430923116 17.14312108817238  
H 15.44538026743349 8.32448576884715 13.16618690799080  
H 16.6216732486278 11.12631610971115 8.98348483709329  
H 15.47162024164006 9.94941542413105 10.90419549493895  
H 18.24012025448321 10.23524773797541 12.42767176165584  
H 16.45709349501256 10.35501161272334 16.69053952970929  
H 17.27629834440883 9.39019559967767 14.35101183023753  
H 18.0707190810718 14.11634506176727 9.23730126284721  
H 18.3931353208469 12.01786093673363 11.08815316079384  
H 18.45130851873513 13.59916415408339 13.3025402132001  
H 18.47591087788342 11.60966810108083 14.61935615904119  
H 8.09968671228691 12.97674677647734 14.34387253107099  
H 11.93316789331389 19.34084146742240 14.63798181240902  
H 11.14623328903744 12.14692848216623 18.24811115508833  
H 15.11807201818428 14.54472814804686 18.56575971269252  
H 12.73798108365093 8.18548332790867 13.42537070993342  
H 14.10577397403207 13.13406656847367 7.80565115256626  
H 16.76540817783258 16.34068377783976 9.39737429854683  
H 16.80109316479215 15.76494500728891 17.14391810764554  
H 18.15472263580223 13.66834189747325 16.91242958779837  
H 12.54681195534840 7.94951134616799 20.30395486540970  
H 13.11432598532958 6.64314133319759 19.20282344603157  
H 11.30235817726688 6.96795731742008 19.3596156773262  
117  
./HER\_Domain4\_Site3\_-686.44302923.xyz  
Ru 15.25587928271321 13.24147063367377 15.27466844240669  
H 15.28192898996630 13.47509692267153 10.88541980165926  
Ru 15.33475721006132 11.85103915196773 13.01696917129437  
H 13.75394495319711 15.53854989904360 15.4378533583966  
Ru 13.67169693436510 15.89071257832297 11.01698563756467  
Ru 12.48117956687649 13.15850792978585 15.29886618682285  
Ru 13.90379059787725 14.15789252434167 13.12420523323787  
Ru 12.50676930783948 13.42471864108779 10.89723083136418  
Ru 12.66272724854406 11.80922721356441 12.95600597262233  
H 12.38350649759228 16.3987709260231 13.20805362252585  
Ru 11.23163147295638 14.02964961972734 13.11315457432082  
Ru 8.49743453990077 13.95466887866776 13.03143862292256  
Ru 9.68005638543072 16.17526501601356 13.37578274849044  
Ru 9.78150662048257 11.54772629276936 12.96978996935177  
Ru 10.88430085362568 18.42663627557821 13.52851161977896  
H 11.12763556757526 14.18782130715536 8.92220741957208  
Ru 11.232087058087 13.19221306101874 11.03706902301033  
Ru 9.89259233419899 13.02101026781786 15.0666551214162  
Ru 11.13105669460236 13.65958456609504 17.34628481367452  
Ru 12.35672884857967 16.57178792013796 9.000080836266443  
Ru 10.99710851692866 15.68785784162153 11.12785238052482  
H 11.10858029810615 15.37063809605954 15.33611483981203  
Ru 12.3760847051032 15.037888897454 17.53224315139473  
Ru 12.1646342310217 18.01770749226335 11.25712717986289  
Ru 13.48325104007699 18.83741025076029 13.39496717093275  
Ru 12.36760525964357 17.75710424986828 15.57573079114148  
Ru 11.30943565906123 9.32278873953085 12.85172570023179  
Ru 12.58302531399328 11.99578575976420 8.79161418359906  
H 11.20245046570930 11.08192131760352 10.90315182063026  
Ru 11.31644095139996 10.84119659953556 14.80909832987831  
Ru 12.49539703583470 11.39269626438691 17.21623209060466  
Ru 13.77071644040147 14.33093207380177 8.82555494006928  
Ru 13.80111494353127 13.74102377799793 17.46980991145168  
Ru 14.97324482058279 16.71947896685299 9.00666296596910  
H 15.04708192712588 16.5772717392447 13.27128503809445  
Ru 14.9872123897419 16.15803383459917 7.5658875577959  
Ru 14.8789401126662 18.12471419269915 11.22957680826983

Ru 14.84953379059616 17.84475568514358 15.49162140086210  
Ru 14.03716872394400 9.45640494312783 13.00337953346878  
Ru 12.54707715075682 8.72128067502982 15.19852771008536  
Ru 15.17719355889282 12.19032629222458 8.74436681533385  
Ru 14.021288899045974 11.10898577475194 10.85992594120437  
H 13.93172770252338 10.90806461068053 15.07112360074749  
H 15.20940711803204 10.5929829196493 17.17028187424257  
Ru 16.41210192720374 14.51041159813882 8.88191072145466  
Ru 16.54167093095316 14.35548181815223 13.16871438342137  
Ru 16.46935071369908 13.93780593145100 17.36308018619969  
Ru 16.36844518573950 15.94970413592147 11.16258493484301  
Ru 16.3718444082258 15.6977856697990 15.33343564996796  
Ru 16.53076601800405 10.64642147512128 12.80675629624018  
Ru 16.66294823917639 11.31483080673229 10.74430236017052  
Ru 18.01262000544118 11.89823523249885 12.93031423278858  
Ru 16.64932752077424 11.05082671743445 15.05047557156465  
Ru 17.80575466884201 13.7621150009234 11.01379566318467  
Ru 17.78127696466539 13.40548053252652 15.14675325845276  
C 12.34166217031048 7.46809414624050 19.37616900590905  
C 12.42644317104602 8.4533826842343 18.22624533768316  
O 12.35216936705276 7.93672611154947 17.04170788825848  
O 12.56669839639769 9.68693116955125 18.47605825868551  
H 6.88784463558794 13.93078274963616 12.98409768735222  
H 10.49640383452625 7.97180240062613 13.1987787829090  
H 7.9089095281497468 15.56842814031370 13.5725574961268  
H 9.84116003199615 17.47757770929167 14.6759496687393  
H 8.32312692802824 12.47997055621344 12.03649343756609  
H 9.49268609241654 13.24534263096592 16.82410326818813  
H 10.57072456768794 15.92048146064447 9.30422962925182  
H 9.35455956907138 17.86112787387962 12.77310518139082  
H 9.50646281987797 13.57851418318967 9.32615536065140  
H 11.6195645321517 15.43927435261897 17.190150512332400  
H 12.14500965497939 18.27279244583777 9.47249971801238  
H 11.87578859765999 19.4775331295030 12.40608047003289  
H 11.86413054135408 17.70683363914926 17.30998431718362  
H 11.2462023011852 12.74896454662925 7.86013428701170  
H 10.47915070196565 9.46890129194197 11.29743629912887  
H 11.48725968032529 10.6055680601638 9.19141297742720  
H 9.69904483678523 9.70166552547319 13.34848721085728  
H 11.00608723526312 10.70343908893041 16.7023832337864  
H 12.37625051892713 15.10856156200383 7.82436151828448  
H 12.42884918839133 14.36834670553201 18.53390802054397  
H 13.6365768714390 17.43889182655925 8.07302289639903  
H 13.69102076001592 16.82768118318604 18.53628760554119  
H 14.62585140840859 9.571531874875710 17.2592247658805  
H 15.37288889185411 18.3537342421517 9.49214256338552  
H 16.5494770910142 17.61973616406200 11.79752690137187  
H 14.78421336318459 19.35638248309534 14.46894799653705  
H 13.96446943473535 10.76178191523795 8.96350206960871  
H 12.8229877976028 9.60065300192717 11.968403299201  
H 16.033263515302 9.28465174084613 15.402349404904905  
H 13.8775327203788 12.10605364209216 18.32991669832776  
H 15.13642728632625 15.24768290845988 7.79920718023795  
H 16.60806531151737 12.37972172557419 18.18895686271660  
H 18.08676139171273 15.52755749591604 11.35820563712318  
H 15.31832174723229 17.86552891781968 17.22854667734365  
H 15.43768672917837 9.3153193433333 13.1419135433333  
H 16.61901461179139 11.08015451882378 8.99455069320217  
H 15.49194911340821 9.94023407295900 10.91275313039742  
H 18.25018542317362 10.20993270801539 12.46754954324219  
H 16.47122578185147 10.35480655341622 16.69432295263666  
H 17.24544273101335 9.35551532712749 14.31487013375958  
H 18.10422825704329 14.12196820067633 9.2044552922341  
H 18.40486238060866 12.0131961928374 11.09924826514048  
H 18.43394802719551 13.60207640717481 13.30750096824900  
H 18.46898749283237 11.62895388392955 14.63257836932929  
H 8.11006059956235 12.93731549351146 14.32959309414241  
H 12.0739948559741 19.35121200103782 14.61049537612690  
H 11.12743392365191 12.14059029957005 18.21674000257819  
H 15.15472031552029 14.56381771444345 18.54227069718133  
H 12.70299731662625 8.19644626634114 13.45072477434566  
H 16.45768157835423 13.09181725254415 7.82120557603589  
H 16.77512840768982 16.33516950372774 9.38318525229262  
H 16.82320427249706 15.79297414799793 17.13283789634893  
H 18.15096636799982 13.69811167207464 16.8087469041462  
H 12.40845482523152 11.03706902301033 20.3278379990006  
H 13.08798378577582 6.69160675672473 19.24400760028871  
H 11.35272557885215 7.00697369950405 19.37236431076618  
H 16.65901009806253 17.41060682630408 15.07589541872325  
H 10.53928655553885 17.44939229048993 10.90080439055803  
117  
./HER\_Domain4\_Site4\_-686.57317526.xyz  
Ru 15.25467562423538 13.22853691343518 15.30425645192430  
Ru 15.27517145150619 13.47033934411348 10.91509543250743  
Ru 15.32403782159214 11.82873879652728 13.01021200616870  
Ru 13.74720835488698 15.51017187612529 15.46519201087829  
Ru 13.71174588814166 15.82715375110429 11.04193873993633  
Ru 12.45933389921903 13.99136924771132 15.2083987090006  
Ru 13.88663558710102 14.10898135463681 13.14909027492900  
Ru 12.45045398189665 13.42952505907161 10.92794170130744  
Ru 12.62563883882264 11.75858115039663 12.96028889077324  
Ru 12.39256988071570 16.40280256933831 13.302802543108874  
Ru 11.21392197430995 14.00699434329950 13.14670406693845  
H 8.5084810874062719 13.96097460053819 13.07646151239086  
Ru 9.69896055362973 16.17943600878552 13.33793177915550  
Ru 9.80073884817053 11.50786112402623 12.98773869142723

Ru 10.90079724454347 18.45938402452478 13.44666548982845  
Ru 11.13666095396930 14.22513509392031 8.92729837861931  
Ru 9.85829848298619 13.18661657162039 11.02438596770048  
Ru 9.87795876105977 13.00474323742627 15.07946006416704  
Ru 11.15178205828565 13.65124454003788 17.363921180694421  
Ru 12.32851028275538 16.61197858628308 9.0814790690714  
Ru 11.02268046271248 15.6295197644734 11.18321750783995  
Ru 11.10818848271249 15.35259717996263 15.34189786268959  
Ru 12.37970048492571 16.03198520442111 17.52775852706652  
Ru 12.27770923907669 18.01817452819550 11.26817994548738  
Ru 13.52326122676720 18.85888517092394 14.47804419410231  
Ru 12.3128960669852 17.71702362572403 15.54562492951534  
Ru 11.30574314161376 9.31962237146404 12.9272830881966  
Ru 12.58894126337989 12.08862035911800 8.80699964576046  
Ru 11.26977404214923 10.99153475196717 10.85243719097629  
Ru 11.28479067126504 10.84664176807226 14.92450541381404  
Ru 12.49018796400126 11.39915620539792 17.25878094094193  
Ru 13.75235919504776 14.32801481103019 8.84144084779286  
Ru 13.80249125309620 13.73438887953521 17.4719805675268  
Ru 14.95134071612598 16.73286674532296 9.04176115342084  
Ru 15.05022774520061 16.53841707384703 13.30839961630613  
Ru 14.97298635395154 16.1577228255167 17.58375496077565  
Ru 14.84587687212381 18.09808111962296 11.29944880170399  
Ru 14.83240478097666 17.81266151687353 15.51337165232726  
Ru 14.05522239750126 9.439335896385 12.980335896385  
Ru 12.57056886183608 8.7093152357340 15.12445065378979  
Ru 15.16093501201318 12.17701926820193 8.76201306314918  
Ru 13.99649885957279 11.07836250991292 10.85181478278077  
Ru 13.97035457120656 10.86908981839738 15.07755953364840  
Ru 15.32287702248155 11.58496645233065 17.20182415073186  
Ru 16.38218458170443 14.51120360261578 8.8396403831054  
Ru 16.52462428610254 14.34253598621875 13.191363347897296  
Ru 16.45576387080250 13.94646719544441 17.39981040404520  
Ru 16.37673208120778 15.95723697443011 11.18784390869829  
Ru 16.36204225879650 15.67982153065148 15.36070490016575  
Ru 16.54332842644895 9.63158691796855 12.8561939426163  
Ru 16.63590971016631 11.29526935527990 10.73796997487029  
Ru 17.08660182640889 11.87142075436132 12.9173217080451  
Ru 16.66627864399487 11.04282384476222 15.04144423590495  
Ru 17.82527012973981 13.75818255242093 11.03027864150467  
Ru 17.75909513002392 13.37990663295427 15.17755263874766  
C 12.30941652991179 7.43087465199069 19.219428017631  
C 12.39634109285172 8.40823802483370 18.14907423549252  
D 12.28575631219509 7.90707190497994 16.06430131184026  
D 12.57317011642623 9.63635280537208 18.4174666165148  
H 6.91065412372281 13.99381225350456 12.84773956953512  
H 10.93489220393526 8.21859631102727 14.22640905670517  
H 8.00061627272185 15.55750434492512 13.58169574017233  
H 9.64253442745022 17.68550234800446 14.4361230995273  
H 8.32788691272752 12.46092072410205 12.11130199797934  
H 9.480321575617 13.316608129946316 16.80194386377832  
H 10.58461670129959 15.97248724455711 9.35367179514873  
H 9.56462813730341 17.80126070967126 12.46350733475755  
H 9.44528933164619 13.76935566707535 9.41336872321405  
H 10.60815981276539 15.4310847279964 17.17545520085440  
H 11.88490997868679 18.24309948527479 9.48849366389619  
H 11.97216849586366 19.48723208211955 12.3745659055068  
H 11.77456484076590 17.66981098631189 17.20952340621894  
H 11.17465541119181 12.73523942287535 9.93773269489849  
H 10.55379376013196 9.44464803723338 11.21065867107319  
H 11.53682520896187 10.49545108579997 9.20857382137354  
H 9.57680884918212 9.71304845772540 13.1163874717922  
H 10.99183014472494 10.72754316067648 16.71881163372538  
H 12.37815739126117 15.10386397970056 7.84251056560800  
H 12.41942174866822 14.36888571206435 18.54259359964190  
H 13.63311547381640 17.47519535782106 8.14229015545263  
H 13.67291064155802 16.82283594841362 18.56284070455881  
H 14.80941281345893 19.49639488445094 12.44493501548281  
H 15.21636461380896 18.3797423904263 9.52768053253293  
H 16.64377151270438 17.65078538755185 11.61282909189603  
H 14.75404564498190 19.40311694496408 14.62693526741223  
H 13.96084295148443 10.7633238149859 8.94328585138500  
H 12.74048918340844 9.77185635880874 11.6136617467496  
H 14.15054415706420 9.21535456366792 15.72727486107421  
H 15.9881090283813 12.06818160259807 18.3284455852536  
H 15.0804942937942 15.26504925918081 17.8363556236707  
H 16.54454721137001 12.40527538246856 18.2818907458242  
H 18.12434746527224 15.50839688010597 11.21447102690466  
H 15.35054542342163 17.86369633240934 17.22834013925852  
H 15.42011751229449 8.29158674640191 13.13895166876027  
H 16.59881090283813 11.0955187805557 8.96291999220674  
H 15.6452903542196 9.9301197218789 18.9446527459295  
H 18.26232011316105 19.17362376772757 12.51739468349502  
H 16.66765188800099 10.53838297865263 16.7801405224698  
H 17.21874970016857 9.32061756404904 14.38615782769904  
H 18.03958739515832 14.01086562600183 9.26319241356127  
H 18.36081665862510 11.97237952552216 11.07125809715311  
H 18.42102148120199 13.648393834351 12.7859041305514  
H 18.49164655260081 11.6864703765436 14.63264357341203  
H 8.06906128092480 13.07532963384447 14.46731609920711  
H 11.99228722242820 19.33935096858545 14.63227527995848  
H 11.10644896789494 12.12563055104866 18.2377680369610  
H 15.14061928822624 14.54416742207156 18.56339434404499  
H 12.816746879802959 9.16746879802959 13.3781618776494  
H 16.40659377107611 13.11978237649497 7.80821633489209  
H 16.76837310973966 16.31034447437230 9.3929667649113

H 16.83061888629946 15.78615158423875 17.15455920920680  
H 18.1571732516257 13.70543009414763 16.89307116659695  
H 12.45515743320011 7.93919359278072 20.24878470183437  
H 13.06427092592629 6.64427070457340 19.15951397609908  
H 11.32507793317000 6.94248809945706 19.2744237735307  
H 16.61725762857921 17.41023228689067 15.06552658636460  
H 9.79668491570554 11.64769034403342 10.12742308862932  
115  
./HER\_Domain4\_Site5\_-678.90905969.yxz  
Ru 15.25656139280151 13.27121274132443 15.28248692547273  
Ru 15.27125189866221 13.48354235054703 10.881066929079551  
Ru 15.3418990544833 11.85589728691321 13.03580275604431  
Ru 13.73881533678895 15.5361089388819 15.45601207750525  
Ru 13.71186836909026 15.86242956414784 11.02369899315686  
Ru 12.47678584948947 13.15660289730672 15.29811565870436  
Ru 13.91187986061484 14.15653150435679 13.13289847101345  
Ru 12.50139171436523 13.44827907706261 10.90695094115472  
Ru 12.66225127184839 11.81499109294089 12.96080092842929  
Ru 12.40830180607809 16.42077547340110 13.31212550155654  
Ru 11.23682784237947 14.03856220756494 13.13177430762466  
Ru 8.49266279972834 13.96299227559477 13.05490274547229  
Ru 9.70567946365064 16.19878622109871 13.31217465929070  
Ru 9.77214983104390 11.83368981005937 12.9855235818415  
Ru 10.91879684907132 18.46685369079762 13.40612709995132  
Ru 11.11381570231759 14.21165921759138 8.9406390534315  
Ru 9.81672876942935 13.19932772923406 11.07931221495829  
Ru 9.89388979745927 13.00814189917298 15.06271021852975  
Ru 11.13499727118703 13.63640280313486 17.34023916230190  
Ru 12.31519296359407 16.59583544660375 9.04404622489712  
Ru 11.05736807892903 15.66599170794969 11.17331045622217  
Ru 11.09399751179832 15.37303625044414 15.34289816663463  
Ru 12.7828235271875 16.01745691515293 17.53677720524108  
Ru 12.29528621574619 18.03726056377672 11.23035279203967  
Ru 13.52462097306623 18.86529551819335 13.46621257965524  
Ru 12.31877868716797 17.73503970836225 15.54752146884508  
Ru 11.30938243318593 9.31213364455516 12.078011146950410  
Ru 12.57683582755866 12.01134996793708 8.81420802997041  
Ru 11.27057870272335 11.087238294045 10.92265716229700  
Ru 11.31111056748003 10.83282296922433 14.89631707380747  
Ru 12.48956681326119 11.35818631667287 17.21362583031483  
Ru 13.75752875988378 14.34424539674079 8.82242464541992  
Ru 13.80272293169925 13.71174074714058 17.47832932199593  
Ru 14.95388694941807 16.74556334840524 9.01567115104885  
Ru 15.05716344478000 16.57071228930563 13.2063606654919  
Ru 14.98909386489786 16.1471239630742 17.57195424874749  
Ru 14.84092870402494 18.11060908436478 11.27622691231865  
Ru 14.86039093876409 17.82906220569101 15.51603941350997  
Ru 14.04747112894916 9.45467930191774 13.08160844964644  
Ru 12.57952640962032 8.73745969314715 15.19810660325671  
Ru 15.17382486165623 12.18825879714654 8.7544852572454  
Ru 15.39895399282625 16.80194386377832 10.8728028704012  
Ru 13.93524083582979 10.9073236154803 15.0805193712920  
Ru 15.3801513804341 11.59274345557981 17.13886215691275  
Ru 16.39303551392328 14.52081872721417 8.86598870091295  
Ru 16.54811411199845 14.35389813124134 13.15277254138363  
Ru 16.48710617996480 13.92014341912757 17.37584169527890  
Ru 16.38808739092367 19.12744565905608 17.1556591090039  
Ru 16.37886001488991 15.67239406826860 15.33685666199668  
Ru 16.54014320444806 9.6501442023315 12.8548183904050  
Ru 16.64705734082394 11.32259111713716 10.76708559325502  
Ru 18.01706639016167 11.92560097406118 12.92477813383499  
Ru 16.62686042296163 11.06656848619406 15.07541206072546  
Ru 17.798374542908145 13.76544942073365 10.9881882447720  
Ru 17.78933428068554 13.4015718591557 15.15615013758022  
C 12.35400612499331 7.43947068424912 19.35362228991311  
C 12.44249241651422 8.41644077984769 18.21202688524492  
D 12.38980485034492 7.90755478662560 17.02296624464945  
D 12.56345979373919 9.65059990970665 18.4731728132949  
H 6.80423406193022 13.9705088658957 13.0790516077007  
H 10.50626423392555 7.9806653828743 13.31045562420353  
H 8.00857878813604 15.58597465734018 13.52081056181434  
H 9.56521750924584 17.73254541220694 14.32840463677755  
H 8.30328025384741 12.45343810534481 12.10795759940367  
H 9.49203134551881 13.21908126973839 16.81416847049834  
H 10.57481550803026 15.97922336724204 9.3435395828589  
H 6.619135947338481 12.7465138705262 7.92353795696634  
H 9.47447977651331 13.66409235340441 9.3978590106636  
H 10.60338075712005 15.41307590880687 17.17688322495677  
H 11.85855955908901 18.23755065402951 9.47734922722849  
H 12.02771134617571 19.515711867699593 12.38045054266628  
H 11.8131506045794 17.66145717059428 17.29615370397271  
H 11.19135943389482 12.7465138705262 7.92353795696634  
H 10.50416084597411 9.4780253851591 11.27769677717611  
H 11.48710850973770 10.60088472557903 9.22955689750271  
H 9.674520836918845 9.68746350345521 13.30434275391501  
H 11.00186486751029 10.66478226677378 16.70930436300815  
H 12.35455369073738 15.1071288396173 7.8349262653945  
H 11.42001170903300 14.36540641024282 18.527347385762  
H 13.61733367717129 17.4785179632282 8.12464642617160  
H 13.6776924174615 16.82941131057157 18.52396474668074  
H 14.82083744931353 19.49296135922133 12.45434385121458  
H 15.24677834133982 18.39611458352218 9.52538520735184  
H 16.63218617271411 17.65094292098673 11.63095201451856  
H 14.7942165081276439 19.39895611465805 14.624462165486  
H 13.9622854066504 10.7789719337720 8.97808799404668  
H 12.80907324709173 9.6231388073796 11.713594208748617

H 14. 20477851244081 9.18776996817594 15.55441748262706  
H 13. 83966239307292 12.08170096296319 18.33622667075908  
H 15. 11238272951121 15.2759818966949 7.8010799731368  
H 16. 70827636824628 12.31680887239017 18.088928919100785  
H 18. 10802650948519 15.53566614836351 11.33939801527739  
H 15. 35303744715993 17.84503644483711 17.25482109621943  
H 15. 4473259049730 8.3238965123809 13.20394775756424  
H 16. 60606921396390 11.08044396447623 9.00357231564444  
H 15. 48768819572219 9.93730912699634 10.95380640158802  
H 18. 21573586923236 10.24922100642375 12.39125928783199  
H 17. 24759071625706 9.36714554454936 14.37469395768530  
H 18. 0828299119859 14.11662485478123 9.25147736597708  
H 18. 3857318291767 12.02849461423256 11.1442832876467  
H 18. 46721734822662 13.60247242709049 13.36602276444775  
H 18. 42983669255634 11.59229638217553 14.65377159457767  
H 8. 08996182753970 12.99778889475619 14.37744741758306  
H 11. 91802270647585 19.34635107585378 14.62900417462900  
H 11. 134347834758614 12.13359342818074 18.22985987012646  
H 15. 14089847152123 14.5295557869151 10.54211553188754  
H 12. 71614919357235 8.19583011327281 13.44355460214039  
H 16. 42808327074011 13.11184921516271 7.80570919963022  
H 16. 77066413682959 16.33134351155999 9.37817570566482  
H 16. 81693170183125 15.7778367019063 17.15091874258882  
H 18. 1759912602176 13.69439708352963 16.88814319411023  
H 12. 5180941828144 17.94534469794338 20.309211561866  
H 13. 09103161498489 6.63824759382511 19.2119569565811  
H 11. 35972914383125 6.97142789628364 19.34992254111884  
H 16. 58133869736904 17.41037862584721 14.9422446258937

56  
./HER\_Ru55\_51tel\_-428\_37917041.xyz  
Ru 11. 02838189620972 9.52962393728558 8.6802077485625  
Ru 12. 951815742409541 11.78073786808664 8.7419489456253  
Ru 12. 24383709611897 17.130554108860956 8.77347820847768  
Ru 13. 55067259992979 13.90931644701102 8.73701229851623  
Ru 13. 54908599074282 9.38577534076250 4.6008778253261  
Ru 12. 29941128561035 8.64978618918688 6.68044674841773  
Ru 13. 57768796752486 8.43322087099877 8.7598282870073  
Ru 12. 22096473411815 8.7124180187744 10.77343694247969  
Ru 13. 52646582800209 9.4392470100965 12.87566870963751  
Ru 14. 91449518971207 11.72344573190022 4.57235730186875  
Ru 13. 59671774375080 10.93950659340757 6.66232575980504  
Ru 14. 95915642477171 11.76929582473117 8.75879700640191  
Ru 13. 65935976776992 10.96210365422181 10.84306844811338  
Ru 14. 04318207120264 11.70207320240058 12.9003613810068  
Ru 14. 89765259879429 13.20842978644301 6.67119857808471  
Ru 16. 19895749574208 14.03237386488125 8.71097395625869  
Ru 14. 85585535066229 13.23991376485273 10.81526317746917  
Ru 13. 58811218712559 4.91590892243852 8.8010665377710  
Ru 14. 85959603093756 7.148836258072716 4.64904847508187  
Ru 13. 592135442400 6.3894899137217 6.99795197401765  
Ru 14. 89559783867994 7.10353377244313 8.77756385196635  
Ru 13. 58509821585986 6.40010483524953 10.8177367884182  
Ru 14. 09920811746396 7.12511478504353 12.96347654831594  
Ru 16. 17634756516533 9.41184419514829 4.56722322781540  
Ru 14. 93917583758717 8.66894456869171 6.66792686485161  
Ru 16. 28142440829661 9.45979972382054 8.80489453760674  
Ru 17. 48218020993959 6.63042076734973 10.94764744227058  
Ru 16. 12533075936358 9.41367451204365 13.00570034699408  
Ru 17. 44022851125183 11.64453584764663 4.49515695993102  
Ru 16. 27817439268889 10.95426015449940 6.61747009687789  
Ru 17. 61945279134335 11.85577382816919 8.77124175935812  
Ru 16. 25989120156513 10.98702784847976 10.9622742129440  
Ru 17. 45078047059881 11.64910156697599 13.04609638419558  
Ru 17. 49541080155767 13.18846799493748 6.64398468720852  
Ru 17. 41304646892379 13.22706604039554 10.89484324741737  
Ru 16. 35208303573009 4.90391930788622 8.85915857073163  
Ru 14. 94846088063668 4.20660746965394 10.76367193124219  
Ru 17. 44949004503793 7.14474043267263 4.58539065555992  
Ru 16. 25737423027472 6.36551948955780 6.67058217921963  
Ru 17. 61750195278713 7.16528714842935 8.80568440810233  
Ru 16. 22754546392916 6.33891361470392 10.92767274670205  
Ru 17. 52956569397631 7.1968859779072 12.93191707162168  
Ru 18. 76368367480359 9.45409848836255 4.53305778085008  
Ru 17. 57492907369687 8.65784993474831 6.57592487237362  
Ru 19. 02517571656342 9.47698990399623 8.795242728990  
Ru 20. 2118240594398 8.77855295393950 10.90462614858592  
Ru 18. 70842733555481 9.4833970389192 13.08677176484771  
Ru 18. 83726882952924 10.90304453798366 6.65396167997111  
Ru 18. 81174368726992 11.00841893373742 10.89920690457553  
Ru 18. 79018244922479 4.90579123222363 8.84358260557681  
Ru 18. 84018617797959 6.30462361797504 6.7299917536732  
Ru 20. 2118240594398 7.16448026566144 8.77325641290319  
Ru 18. 86192263579081 6.43753262419167 10.87614475944488  
Ru 20. 11843945004572 8.63651099160243 6.67901577124577  
Ru 20. 09402148564427 6.65291308532263 10.94624640145735  
H 13. 54668650357789 10.92410164067263 3.65906750863709

56  
./HER\_Ru55\_51tel\_-428\_43563036.xyz  
Ru 11. 02233382559711 9.50853392243366 8.68986185323263  
Ru 12. 34221745674371 11.70700995755478 8.75411176182592  
Ru 12. 24907012517518 7.13038022421478 8.79048424181527  
Ru 13. 54588648588958 13.9129132971524 8.79556076300041  
Ru 13. 57514349311275 9.42932350345593 4.644280476442676  
Ru 12. 294182383930 8.654138253526 6.69631186596699  
Ru 13. 57269291076440 4.45690838073764 8.76656259975019  
Ru 12. 21126724141493 8.7139290131432 10.78361022162836

Ru 13. 51123506492166 9.43183998099547 12.89001179130842  
Ru 14. 89489877597177 11.71710240004705 4.62891207299797  
Ru 13. 57608756109944 10.9577741055369 6.66460143863069  
Ru 14. 93734864641251 11.76714959150614 8.79549357331521  
Ru 13. 54235019399832 10.96304291778948 10.8666255824867  
Ru 14. 81729477409038 11.69838708075451 12.91450768407752  
Ru 14. 8702096808994 13.2073980183831 6.716357199513  
Ru 16. 19587884607939 14.03057712323643 8.76725247680041  
Ru 14. 84177024488114 13.23717850972768 10.85949101493806  
Ru 13. 58690508823120 4.92137579403425 8.78221286855495  
Ru 14. 89087144355561 7.1473413781046 4.66321314079213  
Ru 13. 59360677116265 6.39848298614629 6.68803040243751  
Ru 14. 87270060191678 7.11397189636813 8.78213974758875  
Ru 13. 58621872150262 6.3872240398366 10.81724587139596  
Ru 14. 86285172355723 7.12572113330834 12.94501635037102  
Ru 16. 20844657435194 9.4203617356082 4.5569077867535  
Ru 14. 93364948615892 8.7015916995966 6.64256674516615  
Ru 16. 27541564831334 9.45421464220572 8.89757911051048  
Ru 14. 87305994632628 8.6494197638270 10.94566150651709  
Ru 16. 10571444204561 9.39821860278509 13.02366418520850  
Ru 17. 45914274193861 11.70712493238839 4.55813779338421  
Ru 16. 25225422409694 10.96553893073215 6.6121884506539  
Ru 17. 61726863594952 11.85004733322971 8.81148279545468  
Ru 16. 25350686040814 10.97576394690056 10.9730633860680  
Ru 17. 427260296918244 11.6457592329174 13.0024744202820  
Ru 17. 4714788240138 13.20330779335697 6.69685427471139  
Ru 17. 38898793802751 13.22407006557658 10.94927089238164  
Ru 16. 34809128885318 4.91420599452230 8.87475501138879  
Ru 14. 94534447530177 4.20760134650032 10.76223820812324  
Ru 17. 43146028136916 7.11410435405235 4.62112598512916  
Ru 16. 27693581776229 6.29062932827146 6.71148028591838  
Ru 17. 6434446052457 7.13972540741824 8.82371752471732  
Ru 16. 22454468082860 6.34781930762674 10.93639789432153  
Ru 17. 49711233606880 7.17707926926247 12.94857926751611  
Ru 18. 76791663994308 9.57284641212123 4.55099523709966  
Ru 17. 61442670610425 8.67855808095651 6.57928204392658  
Ru 19. 01589412673258 9.49525274959001 8.83241319647922  
Ru 17. 5956191642105 8.770739023843 10.9915520590192  
Ru 18. 68087561934817 9.48657893654856 13.1112849294051  
Ru 18. 87046941567329 10.94771292042576 6.7083965739010  
Ru 18. 80237627561883 11.00623085925582 10.96186671489127  
Ru 18. 79307303642578 4.91269261674160 8.83622326586855  
Ru 18. 85820590376699 6.37644547509578 6.75226230967647  
Ru 20. 20035524713992 7.16602597823731 8.8048187000153  
Ru 18. 85286808510981 6.4265181035070 9.9083663817220  
Ru 20. 12390947519153 8.6756394413042 6.74920785293134  
Ru 20. 07985267958465 8.65700057614826 10.98215084687557  
H 20. 482026562421659 10.15325284836650 5.77197986398161

56  
./HER\_Ru55\_51tel\_-428\_44367052.xyz  
Ru 11. 00104748141214 4.8556562756977 8.7980275154014  
Ru 12. 31212764501519 11.67969947806161 8.81946675087854  
Ru 12. 23832321848939 7.08670540523301 8.84518982729469  
Ru 13. 48802578026393 13.88178863247340 8.8518233064493  
Ru 13. 49058699555157 9.38245562085797 4.68761645250340  
Ru 12. 24071284767599 8.6230336022364 6.70811164265175  
Ru 12. 22354562737907 8.6730814193821 4.44204483917  
Ru 13. 54519241534145 9.38349465501194 12.92952066464447  
Ru 14. 74359391379369 11.66771487342521 4.65102729017123  
Ru 13. 50787135560052 10.92966328099682 6.71418608970486  
Ru 14. 91820924394183 11.74980952780979 8.82714485211330  
Ru 13. 55388336727797 10.9212780630015 10.9065489141181  
Ru 14. 8356870935365 11.65570375270231 12.9570432218071  
Ru 14. 77721937473632 13.23481551938046 6.73612973472350  
Ru 16. 15702622073734 14.83599551130437 8.70711802847043  
Ru 14. 83279744242476 13.2268671685801 10.87384300954689  
Ru 13. 6052695193726 4.89481953270886 8.8353923810908  
Ru 14. 8526722644706 7.10939657707551 4.6524580036051  
Ru 13. 57298026799135 8.8838009494228 6.7361837234168  
Ru 14. 89382753309282 7.09492584044223 8.81178540214239  
Ru 13. 60476895629321 6.36845240499147 10.86252634436838  
Ru 14. 93663947682594 7.10023588515862 12.9808809586291  
Ru 16. 09294120736035 9.4112036557132 4.54700521094382  
Ru 14. 88744711429295 8.64139376820567 6.65723938981811  
Ru 16. 2471942020595 9.46967756929675 8.7076929172117  
Ru 14. 89525617804169 8.60673654658134 10.97069789118284  
Ru 16. 15130688084775 9.38811191389622 13.01890853993336  
Ru 17. 46235746796219 11.57278113094373 4.48705979056016  
Ru 16. 19094851473435 10.99327395640654 6.57796657927198  
Ru 17. 58018188857808 11.07281378990886 8.79324019402036  
Ru 16. 24554431154170 10.9717369309947 10.971351747468  
Ru 17. 44784819093881 11.65474687807475 13.05317452562090  
Ru 17. 41506643864149 13.20344470062322 6.67514097213315  
Ru 17. 35196560480999 13.22519369815934 10.9365563323456  
Ru 16. 37099940974671 4.90286796417906 8.86022601310445  
Ru 14. 98692677645279 4.17653306146484 10.77009466263881  
Ru 17. 46020684815908 7.14339834499947 4.61221356604312  
Ru 16. 22170846808090 6.37083555366292 6.68477608940773  
Ru 17. 60173399426595 7.17678523218967 8.78973124978642  
Ru 16. 23804014364817 6.32464649844703 10.94398282652078  
Ru 17. 57084694119357 7.18829698512270 12.91265032606412  
Ru 18. 71020166353603 9.41210483563633 4.51208475958476  
Ru 17. 51520367389301 8.70997687014424 6.57696810659699  
Ru 18. 90487012563363 9.49117640417552 8.759627576843  
Ru 17. 59898380878152 8.7695088613317 10.95573077020150

Ru 18.72977765115800 9.50891178292627 13.05379257370191  
Ru 18.74152172988826 10.98266764100103 6.64960649152348  
Ru 18.80198377425900 11.00169654628477 10.89618766192596  
Ru 18.80505186199193 4.92417753843802 8.75947471551248  
Ru 18.81209089699623 6.41276722947542 6.69496297200270  
Ru 20.20917517202068 7.19816541227713 8.79693226065825  
Ru 18.8254128615414 6.44037649560863 10.83967442861553  
Ru 20.05439956958743 8.63280382094019 6.62611524235450  
Ru 20.10248138278231 8.67446248482896 10.88648761452259  
H 14.24316123484481 13.38387663481188 5.01281728733824

56  
\_HER\_Ru55\_Site4\_-428.28924974\_xyz  
Ru 11.01794313667133 9.55854095955363 8.70842292308927  
Ru 12.33394175387685 11.71764614458055 8.74182054636044  
Ru 12.26014983662851 7.14127344536561 8.75486345983793  
Ru 13.53819402683792 13.92059525587073 7.4686407549321  
Ru 13.60478983043985 9.45743694340420 4.61579643139629  
Ru 12.27469539118528 8.69445489674685 6.66619173330479  
Ru 13.55925126459341 9.42698187475779 8.75081201202378  
Ru 12.18196536986062 8.70653406235885 10.76659922229823  
Ru 13.50662142329429 9.43457841865900 12.87564157430545  
Ru 14.89353168013453 11.71716996263682 4.64226879787567  
Ru 13.57755936319751 10.96313804906124 6.66182798300292  
Ru 14.93920272363868 11.78146874564855 8.76627561222383  
Ru 13.544762831912035 10.95317639428677 10.8353911643231  
Ru 14.77872492739469 11.68271285637059 12.90488605143753  
Ru 14.87347795630739 13.24462688824894 6.70380854792466  
Ru 16.19267235259989 14.03360326975688 8.79789508037896  
Ru 14.82019156995073 13.23035727462382 10.84207579827381  
Ru 13.61048634552836 4.90837549211378 8.79855701360819  
Ru 14.96764191173935 7.15067442471961 4.60269069749771  
Ru 13.62663712593866 6.30378297812135 6.64960628327847  
Ru 14.87356614310375 7.11366817373826 8.76176817421267  
Ru 13.56332809068148 6.38622591903587 10.82031812832415  
Ru 14.86936341038807 7.12128752929675 12.94691076129968  
Ru 16.21246113892964 9.44817572370668 4.54749658219414  
Ru 14.92473255725226 6.67871171648053 6.61707512887226  
Ru 16.25861800670623 9.46232239344594 8.7912688351510  
Ru 14.86172487450649 8.6389213377532 10.94154661285428  
Ru 16.09123384237563 9.38314847625789 13.01325207268649  
Ru 17.53079506650386 11.65592976195607 4.53929820926406  
Ru 16.28309941384652 10.97373650492366 6.60137410545183  
Ru 17.60754308209169 11.86966526419889 8.82684743353816  
Ru 16.22926138254426 10.9881537156612 10.97279809729533  
Ru 17.42519255768428 11.61581951227722 13.07834267619232  
Ru 17.46308622637579 13.21150189358368 6.7035043397567  
Ru 17.40211252306085 13.22871844129809 10.94820624228066  
Ru 16.36192015098038 4.91461174652604 8.85195248782360  
Ru 14.94367908492472 4.18985661538704 10.73879978416757  
Ru 17.53066676643564 7.16250210153796 4.63961594266243  
Ru 15.26092124618473 6.30714459098390 6.67217044585838  
Ru 17.61737813104998 7.17176686120286 8.80993687504361  
Ru 16.19870338767498 6.34565926886969 10.91349137100243  
Ru 17.50786073274562 7.16446727774650 12.92682540229108  
Ru 18.81228045585457 9.49505386877079 4.56981557589165  
Ru 17.58863954669096 8.70423895513128 6.59399261780792  
Ru 19.0058405071725 9.49013435408451 8.82948150084615  
Ru 17.58126041101349 8.76277884802027 10.96826864514794  
Ru 18.67158391124783 9.45149570913794 13.10471092976346  
Ru 18.83588800049847 10.95950396746749 6.70981190747108  
Ru 18.78399950549894 11.01572901118882 10.97178678843210  
Ru 18.7933899571396 4.92162562881518 8.78104617709385  
Ru 18.88207833525434 6.42348314891798 6.7233929534684  
Ru 20.20220424528287 7.19157938227336 8.84401437698056  
Ru 18.82500558501933 6.41135958011272 10.8460539189289  
Ru 20.12541090488835 6.65986327758939 6.72493362300674  
Ru 20.07169527159685 8.63911956431168 10.98345424621957  
H 11.75511853353246 6.79212246130622 7.02918581825009

56  
\_HER\_Ru55\_Site5\_-428.39245499\_xyz  
Ru 11.01814759984539 9.52217618308809 8.70415707870309  
Ru 12.34643618022081 11.70770221945546 8.7526346260173  
Ru 12.24036622328391 7.13694269504842 8.8053264293984  
Ru 13.54986632710480 13.91605308818023 8.80071966952221  
Ru 13.54981460016916 9.43051822601620 4.63165407830958  
Ru 12.2765188509232 8.65952179187627 6.70211954249909  
Ru 13.56842747019609 9.44585141836760 8.77242023279173  
Ru 12.22341999591187 8.71980817084578 10.78995200020675  
Ru 13.53288978240047 9.42858248996529 12.89416540286212  
Ru 14.88764954239717 11.74175500498850 4.63486737739018  
Ru 13.5591843040482 10.94579162283782 6.65873613145903  
Ru 14.94065180118797 11.76114077697349 8.78506265651847  
Ru 13.56665612885650 10.9602740952118 10.86468420709080  
Ru 14.84795747798808 11.72088295344834 12.90038551842822  
Ru 14.86709822396377 13.20529052559970 6.70782388083650  
Ru 16.20488245485072 14.02801994379307 8.70411005821698  
Ru 14.86395291442829 13.24022637652827 10.8358568225147  
Ru 13.56661754099551 4.91872131610463 8.78044170663379  
Ru 14.84463235678761 7.14355032364603 4.63674913825953  
Ru 13.57694435397247 6.39596313144223 6.69945035370670  
Ru 14.87457530347237 7.10611670309694 8.78105185254526  
Ru 13.595689958742460 6.38616875879802 10.82471983765920  
Ru 14.89382057161707 7.14146861845439 12.97413905380918  
Ru 16.1558757304619 9.42010401349370 4.55620674264641  
Ru 14.89427759505592 6.68998711789453 6.62577708049749  
Ru 16.26850645985569 9.44869364793320 8.79251423826028

Ru 14.87823562855674 8.63309347926725 10.94483124277322  
Ru 16.13181464365641 9.40571275826225 13.01874714626903  
Ru 17.44674749911071 11.64048623713006 4.48997236790540  
Ru 16.26256264589107 10.95950265252746 6.60344956636939  
Ru 17.61981193796554 11.85067222492320 8.79320092793078  
Ru 16.26128755767634 10.96529928626044 10.9593923756306  
Ru 17.44369874312904 11.65217823351092 13.04592066041619  
Ru 17.48047060472359 13.1855337380838 6.65911631927985  
Ru 17.40719172905053 13.21104189141504 10.91250807372666  
Ru 16.34152531932644 4.90272461368979 8.84250654654727  
Ru 14.94683278040848 4.18630352970301 10.72300734584400  
Ru 17.40976904444462 7.15194137769468 4.58103819340874  
Ru 16.23046792857113 6.38094195916022 6.67637508593622  
Ru 17.62399533009559 7.17253337159530 8.79288352373173  
Ru 16.21359661981691 6.33223894884313 10.92374445853219  
Ru 17.50137071657507 7.16169264304350 12.92662795392138  
Ru 18.75062907288512 9.45953251925099 4.52629131316548  
Ru 17.562214839959762 8.6651331361639 6.57990223139176  
Ru 19.02144313452749 9.47235131686450 8.77486690667400  
Ru 17.60873737498245 8.73372736086112 10.97397807202002  
Ru 18.7055428038812 9.50980474754679 13.08344056940262  
Ru 18.81182389342622 10.91990046945825 6.65333902646987  
Ru 18.81582648555712 10.97797486490727 10.91226429837254  
Ru 18.76000561331395 4.90242332713992 8.77467455941526  
Ru 18.83619415443047 6.39833076942005 6.70452043344440  
Ru 20.208802904657340 7.16319262431710 8.79011684741834  
Ru 18.89251928738019 6.39859843927917 10.86279400847340  
Ru 20.09186147068467 8.62990419657504 6.63334281716663  
Ru 20.10888260320905 8.66819754942822 10.89743989232182  
H 18.8192516051785 5.98597538669538 12.65055111716054
